# Supplementary material for: Targeting a key protein-protein interaction surface on mitogen-activated protein kinases by a precision-guided warhead scaffold
Source: PubMed Central journal article supplement — Nat Commun. 2024 Oct 4;15:8607. doi: 10.1038/s41467-024-52574-1 (PMC11452651; doi:10.1038/s41467-024-52574-1), 2024-10-04
Supplement: 41467_2024_52574_MOESM1_ESM.pdf [file 41467_2024_52574_MOESM1_ESM.pdf]

# Targeting a key protein-protein interaction surface on mitogen-activated protein kinases by a precision-guided warhead scaffold with cyclic and chiral structure

Ádám Levente Póti<sup>1,2,#</sup>, Dániel Bálint<sup>3,4,#</sup>, Anita Alexa<sup>1</sup>, Péter Sok<sup>1</sup>, Kristóf Ozsváth<sup>3</sup>, Krisztián Albert<sup>1</sup>, Gábor Turczel<sup>5</sup>, Sarolt Magyari<sup>1</sup>, Orsolya Ember<sup>1</sup>, Kinga Papp<sup>1</sup>, Sándor Balázs Király<sup>6</sup>, Tímea Imre<sup>7</sup>, Krisztina Németh<sup>7</sup>, Tibor Kurtán<sup>6</sup>, Gergő Gógl<sup>1</sup>, Szilárd Varga<sup>3</sup>, Tibor Soós<sup>3,&</sup>, Attila Reményi<sup>1,&</sup>

<sup>1</sup>Biomolecular Interaction Research Group, Institute of Organic Chemistry, Research Centre for Natural Sciences, 1117 Budapest, Hungary

<sup>2</sup>Doctoral School of Biology, Eötvös Loránd University, 1117 Budapest, Hungary

<sup>3</sup>Organocatalysis Research Group, Institute of Organic Chemistry, Research Centre for Natural Sciences, 1117 Budapest, Hungary

<sup>4</sup>Hevesy György PhD School of Chemistry, Eötvös Loránd University, 1117 Budapest, Hungary

<sup>5</sup>NMR Research Laboratory, Centre for Structural Science, Research Centre for Natural Sciences, 1117 Budapest, Hungary

<sup>6</sup>Department of Organic Chemistry, University of Debrecen, 4002 Debrecen, Hungary

<sup>7</sup>MS Metabolomic Research Laboratory, Centre for Structural Science, Research Centre for Natural Sciences, 1117 Budapest, Hungary

# Equal contribution

& Corresponding authors: [soos.tibor@ttk.hu](mailto:soos.tibor@ttk.hu) & [remenyi.attila@ttk.hu](mailto:remenyi.attila@ttk.hu)

## Supplementary Information

|                                                                     |          |
|---------------------------------------------------------------------|----------|
| Supplementary Figure 1-22                                           | p2-25    |
| Supplementary Table 1. Details of X-ray crystallography analysis    | p26      |
| Supplementary Table 2. Structures of Group1-7 compounds             | p27      |
| Supplementary Table 3. List of oligonucleotides used for cloning    | p28      |
| Supplementary Note 1 (NMR of the off-target adducts: BME, His-Test) | p29-34   |
| Supplementary Note 2 (on the ECD measurements)                      | p35-37   |
| Supplementary Note 3 (on the synthesis of the compounds)            | p38-141  |
| Supplementary References                                            | p142-143 |

**a**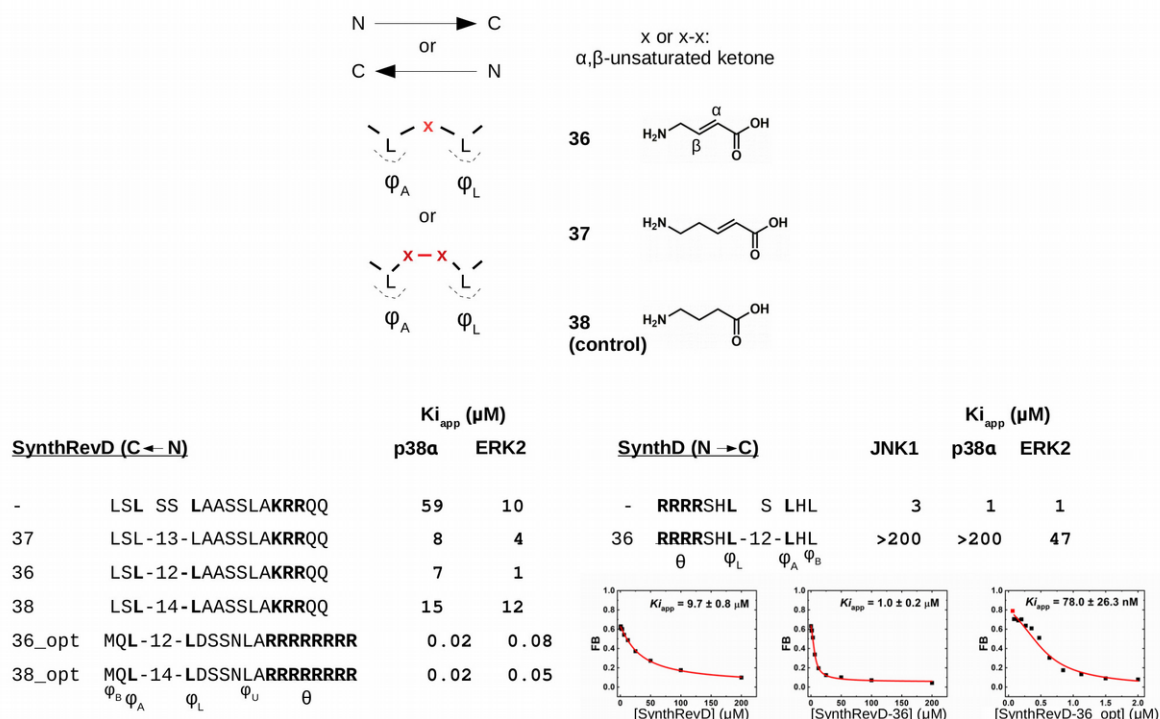**b**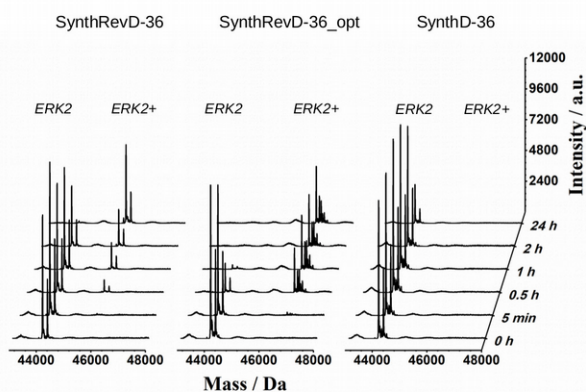

### Supplementary Fig. 1. Characterization of D-peptides containing an intrachain acrylamide Michael acceptor

(a) Different binding modes of peptides binding in the D-groove: classical (D) or reverse (revD) directions; with a spacing of one or two amino acids between  $\varphi_L$  and  $\varphi_A$  (see Fig. 1a). N and C designate N- and C-terminus, and X denotes any amino acid. **36**, **37** and **38** were used as unnatural amino acids that were coupled into peptides by chemical peptide synthesis. The distance between  $\varphi_L$  and  $\varphi_A$  in the new peptides corresponds to approximately 1.5 or 2 amino acid residues in molecules **36** and **37**, respectively. The warhead of **36** or **37**, when used as unnatural amino acid residues synthesized into artificial peptides, could align with the sulfhydryl group of Cys161. Peptides with the intrachain acrylamide warhead bound weaker to all three tested MAPKs compared to the original SynthD peptide (see Supplementary Fig. 2). In contrast, modified peptides based on the SynthRevD pattern bound about 10-fold stronger than the original. To further enhance binding affinity, SynthRevD-36 was extended with a polyarginine stretch and modified at the intervening region (SynthRevD-36\_opt;

referred to as SynthRevD<sup>COV</sup> in the main text), resulting in an ~80 nM affinity to ERK2. Interestingly, a peptide containing an analogue of **36** without the warhead (**38**) also exhibited better binding, indicating that the geometry between  $\phi_L$  and  $\phi_A$  is more optimal in the artificial peptides. (Data points show the mean of three independent experiments.  $K_{i,app}$  values indicate the parameter error estimate from weighted least square method; n=3.)

**(b)** MS analysis of trypsin-digested ERK2–SynthRevD-36 indicated irreversible covalent modification of the Cys161-containing peptide as expected and intact mass measurements were used to follow protein-peptide adduct formation in time (n=1). These measurements revealed faster covalent bond formation to ERK2 with the stronger binding SynthRevD-36<sub>opt</sub> compared to the weaker SynthRevD-36. Modified peptides with the SynthD pattern were found not linked to any of the kinases (see Supplementary Fig. 3). In conclusion, replacing the natural peptide backbone between  $\phi_L$  and  $\phi_A$  with an artificial spacer was well-tolerated, but the intrachain acrylamide warhead targeted the D-groove cysteine only in the SynthRevD context, presumably because of a better placement of the warhead next to the thiol group.

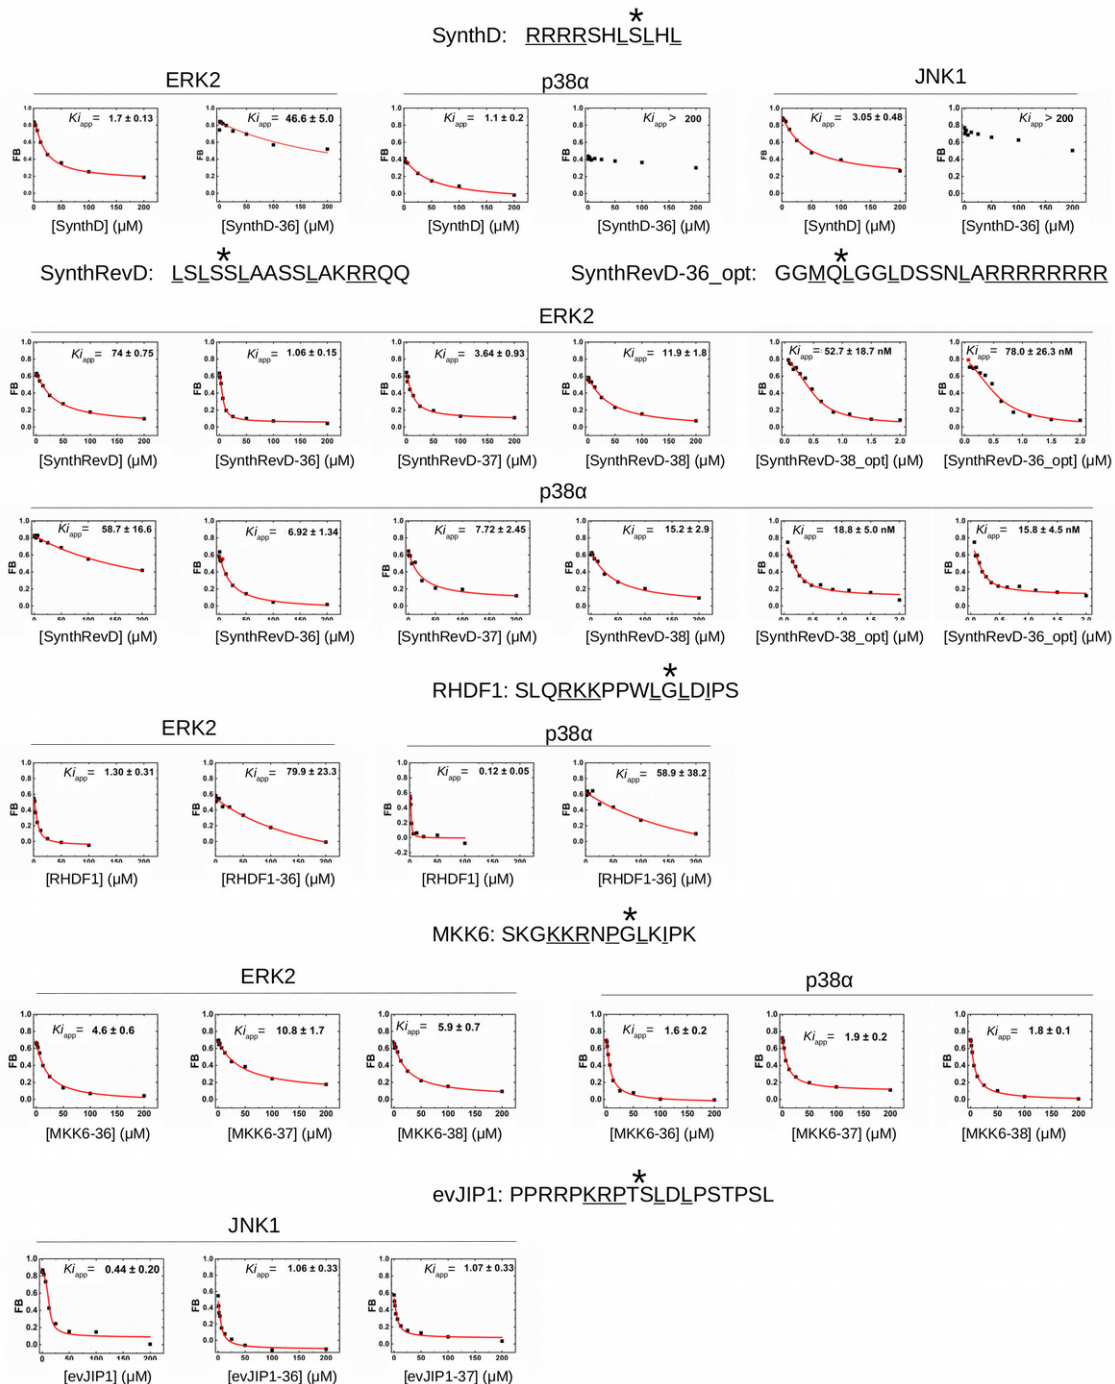

## Supplementary Fig. 2. Results and details of fluorescence polarization based protein-peptide binding assays

FP binding assay results with peptides containing an intrachain acrylamide warhead (ERK2, p38α and JNK1). Amino acid sequence of SynthD, SynthRevD, RHDF1, MKK6 and evJIP1 peptides are shown where \* shows the residue(s) between  $\varphi_L$  and  $\varphi_A$  that were replaced by **36**, **37** or **38**. Underlined amino acids indicate key contact residues ( $\theta$ ,  $\varphi_U$ ,  $\varphi_L$ ,  $\varphi_A$ ,  $\varphi_B$ ). FB: fraction bound. ( $K_{i\_app}$  values indicate the parameter error estimate from weighted least square method;  $n=3$ .)

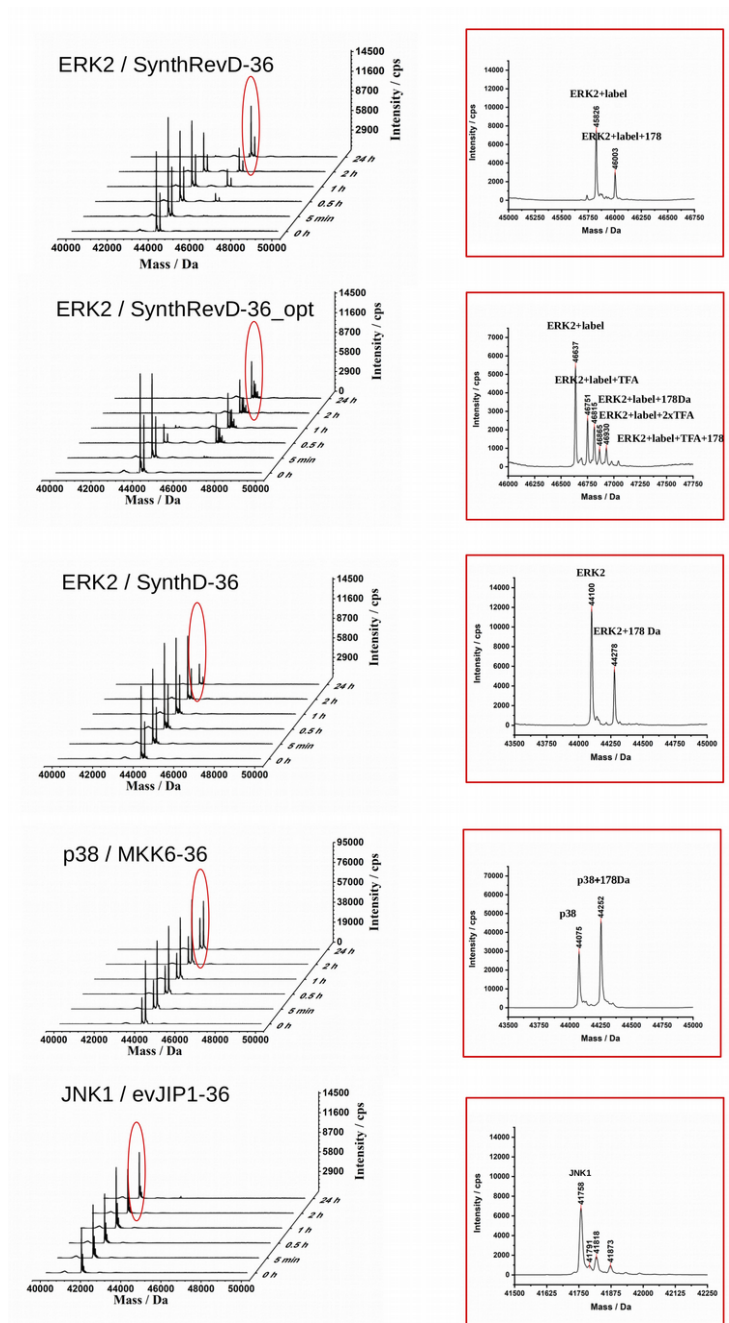

### Supplementary Fig. 3. Results and details of mass spectrometry analysis with an intrachain acrylamide warhead

Results of intact mass measurements with D-peptides containing an intrachain acrylamide warhead (ERK2, p38 and JNK1; n=1). Panels on the right show the zoomed in-view of the area circled red on the left for the sample that was incubated with the peptide for 24 hours. Peptide concentration was 50  $\mu$ M and protein concentration was 5  $\mu$ M. (A mass difference of 178Da corresponds to clipped versions of the 6xHis tagged proteins, and the mass of different ion adducts is also indicated.) “Label” indicates the covalently bound mass of the peptide and “+TFA” denotes the adduct with TFA.

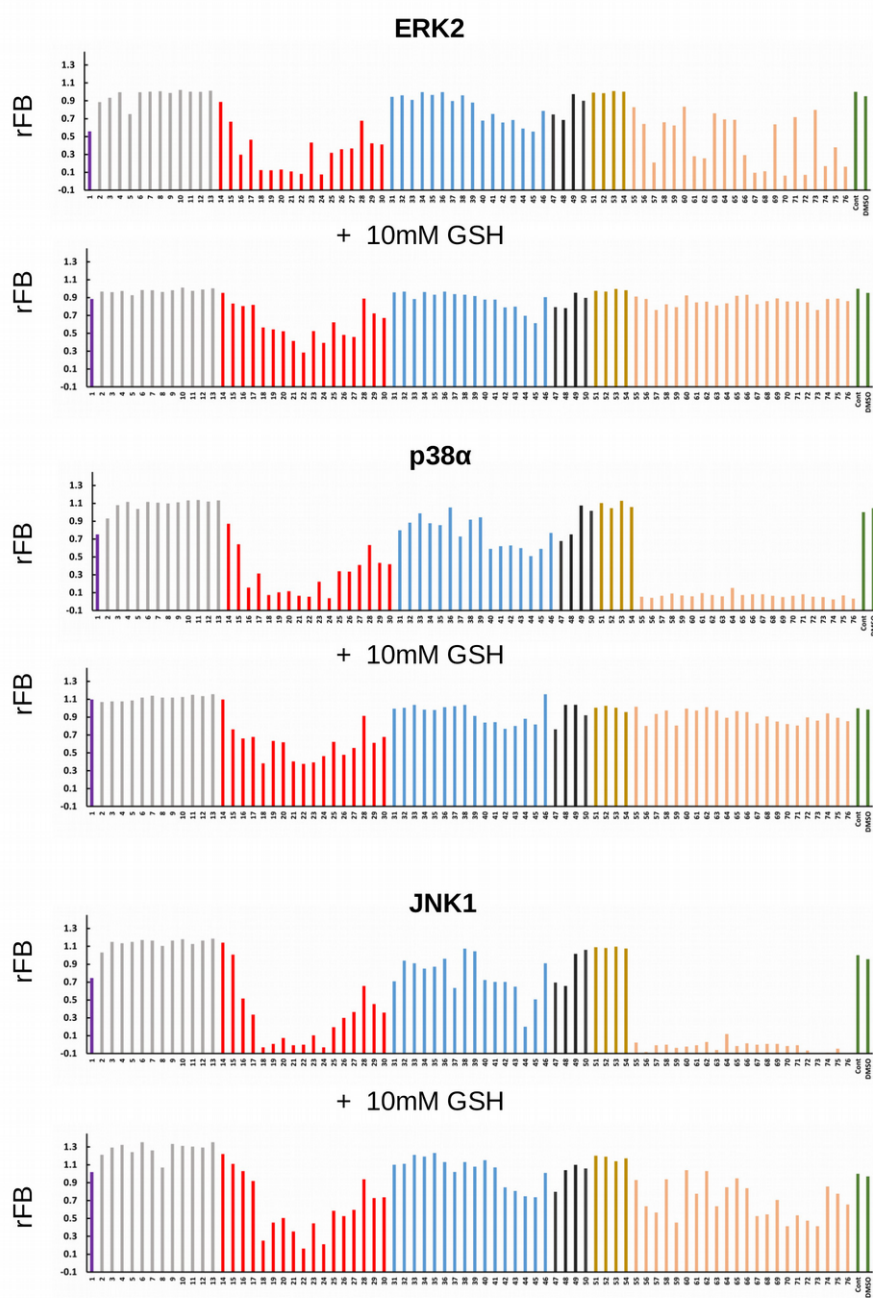

#### Supplementary Fig. 4. Fluorescence polarization based protein-peptide binding primary screen in the presence of 10 mM GSH

Results of the primary MAPK D-motif peptide displacement screen with 75 compounds (100  $\mu$ M) from Group 1-7 (colored as in Fig. 1c) in the absence (upper panels) or in the presence of 10 mM GSH (lower panels) with ERK2, p38 $\alpha$ , and JNK1. Cont: Control, where no compound or DMSO was added; DMSO: the binding mix contained the same amount of DMSO as for the compound set. Data represent the mean for three technical replicates. rFB: relative Fraction Bound compared to Control ( $FP - FP_{min} / FP_{control} - FP_{min}$ ). Lilac: Group 1 (intrachain acrylamide); gray: Group 2 (cyclohexenone); red: Group 3 (“frustrated” cyclohexenone); light blue: Group 4 (chalcone); black: Group 5 (cyanoacryl); gold: Group 6 (“frustrated” cyanoacryl); orange: Group 7 (nitroalkene); green: controls (cont: no compound added; DMSO: 1% DMSO added). Source data are provided as a Source Data file.

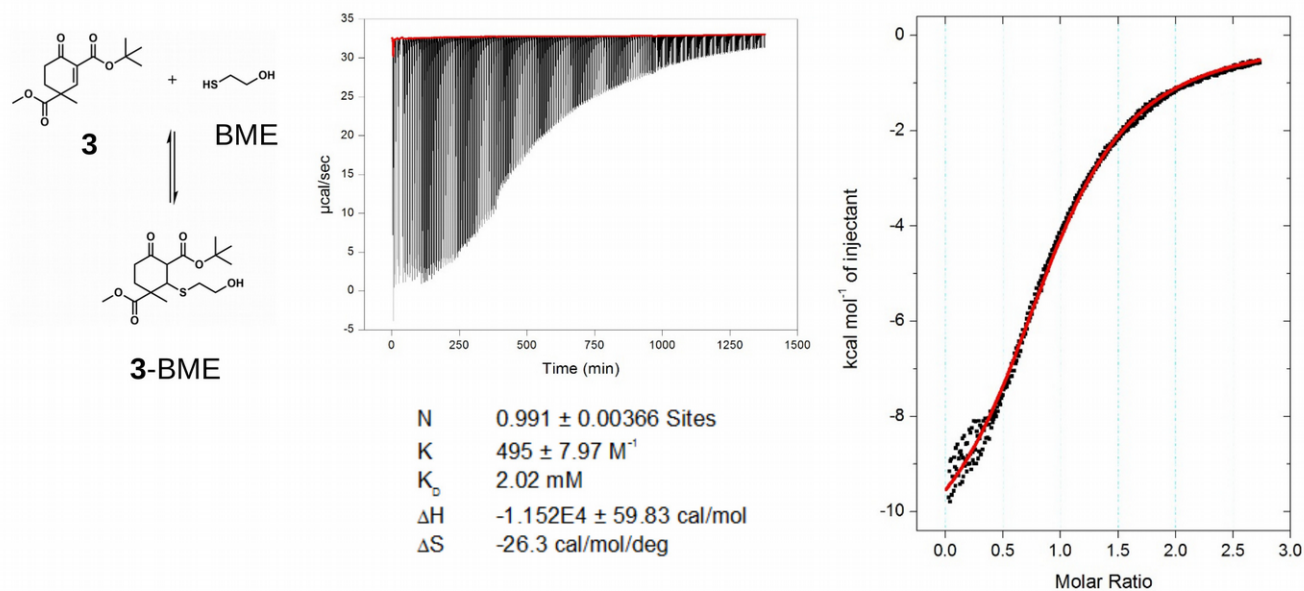

**Supplementary Fig. 5. Binding of 3 with beta-mercaptoethanol (BME) characterized by ITC**  
**3** was in 10 mM concentration (in 1x PBS with 10 % DMSO) and titration from the syringe containing 125 mM BME in the same buffer was done in small aliquots to stay within the dynamic range of the VP-ITC instrument (and delay time between injections was set to allow the system to return to the reference value; n=1).

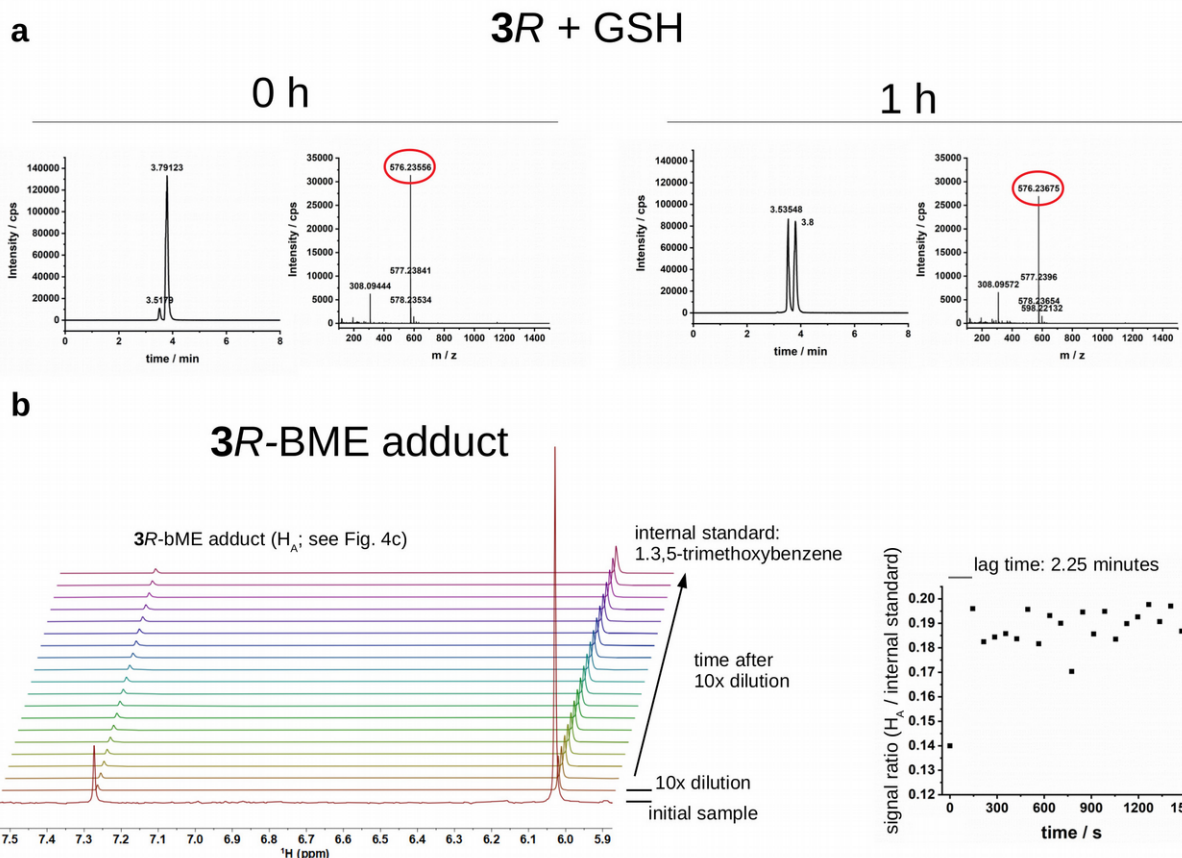

**Supplementary Fig. 6. Characterization of the 3R-GSH covalent adduct (a) by mass spectrometry and (b) the dissociation of the 3R-BME adduct by  $^1\text{H}$  NMR (jump dilution)**

(a) 10 mM GSH was mixed with 50  $\mu\text{M}$  3R in PBS (pH 7.4) and subjected to LC-MS analysis immediately (0 h, practically 5 minutes) and after 1 hour incubation (1 h). The left panel shows the total ion chromatograms while the right shows the mass spectrum corresponding to the highest peak on the ion chromatogram ( $n=1$ ). Note that the formation of the adduct generates new asymmetric centers and the two peaks on the total ion chromatogram correspond to two diastereomers of the adduct, since their mass spectra were identical. The ion chromatogram at 0 h is shown for the bigger peak (right; elution time:  $\sim 3.8$  minutes), while at the 1 h panel it is shown for the increased peak on the left (elution time:  $\sim 3.5$  minutes). The indicated peaks (red circle) in the mass spectra correspond to the exact mass of the 3R-GSH adduct (576 Da). It appears that the adduct forms rapidly under these conditions since there was no significant difference in the combined peak area between 0 or 1 hour incubation, however one of the diastereomers forms faster than the other (possibly due to less activation energy), but the  $\sim 50$ -50% ratio observed after 1 hour incubation did not change even after longer incubation times ( $\sim 4$  hours), suggesting that the two diastereomer adducts may energetically be equal.

(b) The 3R-BME adduct was formed by mixing 81.6 mM 3R with 97.9 mM BME and this initial sample (also containing 23.9 mM 1,3,5-trimethoxybenzene) was diluted by 10-fold with a solution of DMSO:PBS (3:1) mixture ( $n=1$ ). The 6.02 ppm proton signal from 1,3,5-trimethoxybenzene was used as an internal standard. The plot on the right shows the ratio of  $\text{H}_A$  proton (see Fig. 4c) and the internal standard signal from spectra recorded at different time points after the jump dilution. The lag time for recording the first spectrum after the jump dilution was 2.25 minutes. This data suggest that the dissociation of the 3R-BME adduct is fast.



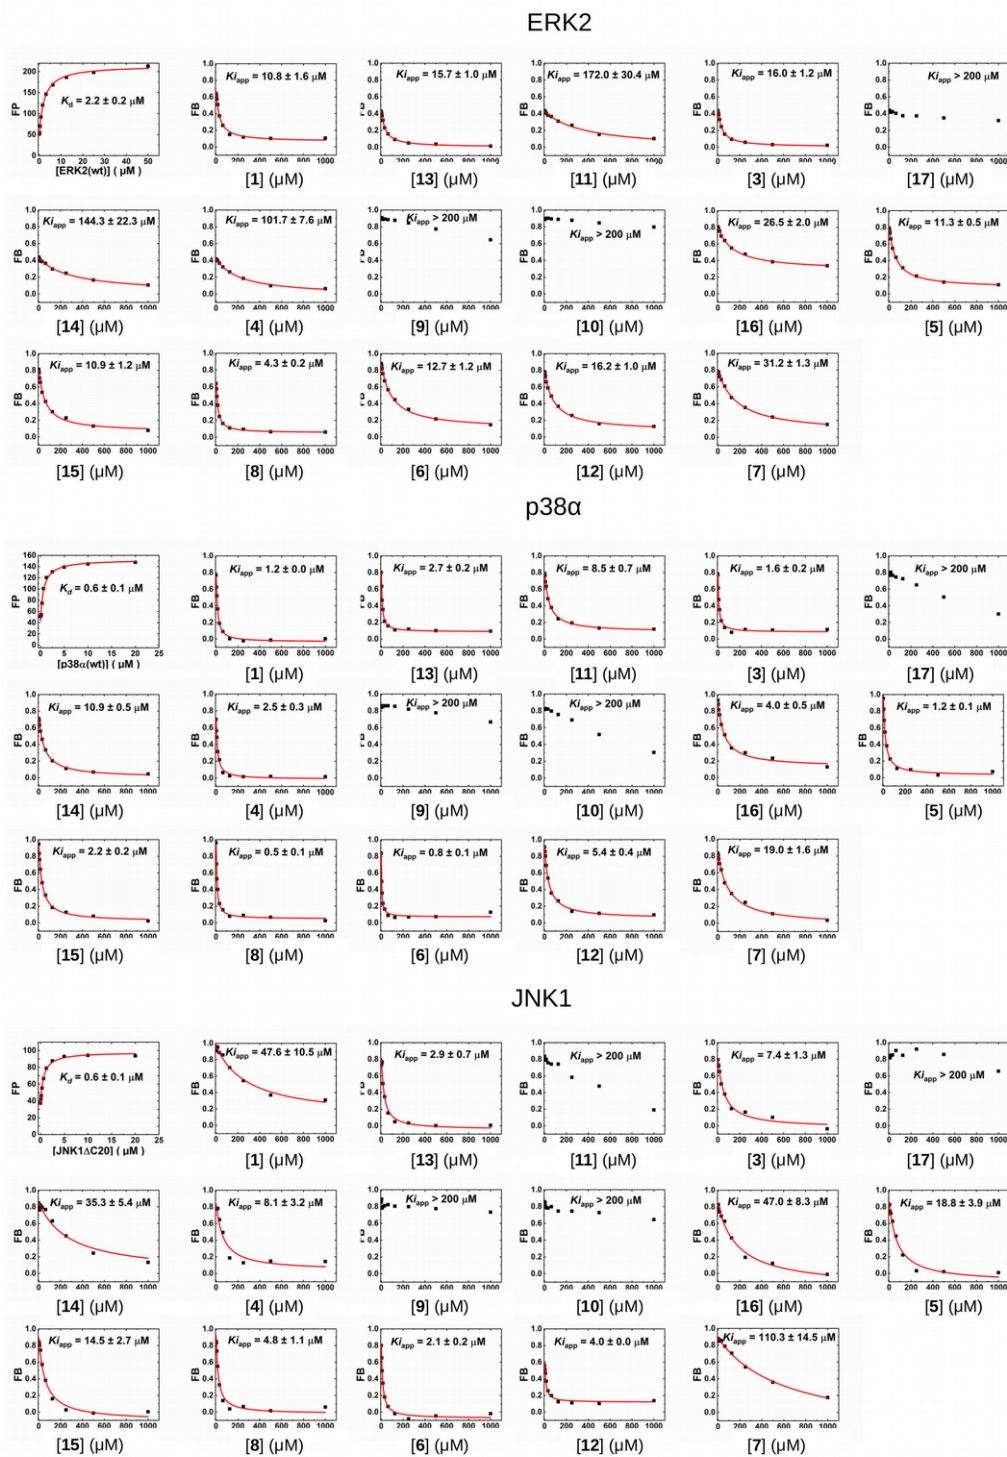

**Supplementary Fig. 7. FP binding results with ERK2, p38α and JNK1**

The first panels on the left for each series show the direct binding titration curve while the rest of the panels show competitive binding curves (see Table 1 for the summary) (FP: fluorescence polarization in arbitrary units; FB: fraction bound). ( $K_{i,app}$  values indicate the parameter error estimate from weighted least square method;  $n=3$ .)

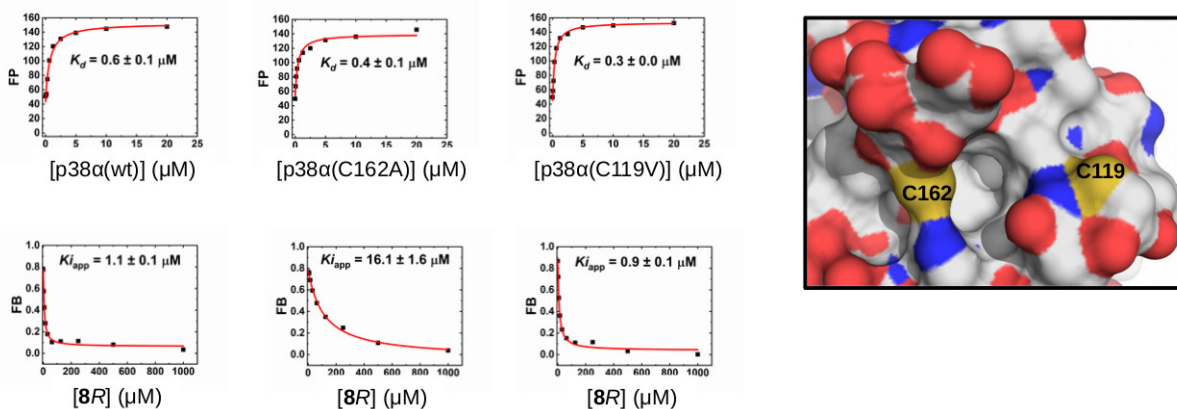

### Supplementary Fig. 8. FP binding results with the p38α C162A or C119V mutants and 8R

The structural panel on the right shows the surface of p38α where surface cysteines – C162 corresponding to C161 in ERK2 and C119 located close but outside of the D-groove – are colored in yellow. (C, O, N, and S atoms are colored in gray, red, blue and yellow, respectively.) Note that C162A mutation greatly reduces 8R binding while mutating C119 does not have such an adverse affect. Upper panels show direct binding titration experiments which demonstrate that C162A or C119V mutations do not interfere with reporter peptide binding. FB: fraction bound. ( $K_{i,app}$  values indicate the parameter error estimate from weighted least square method;  $n=3$ .) Source data are provided as a Source Data file.

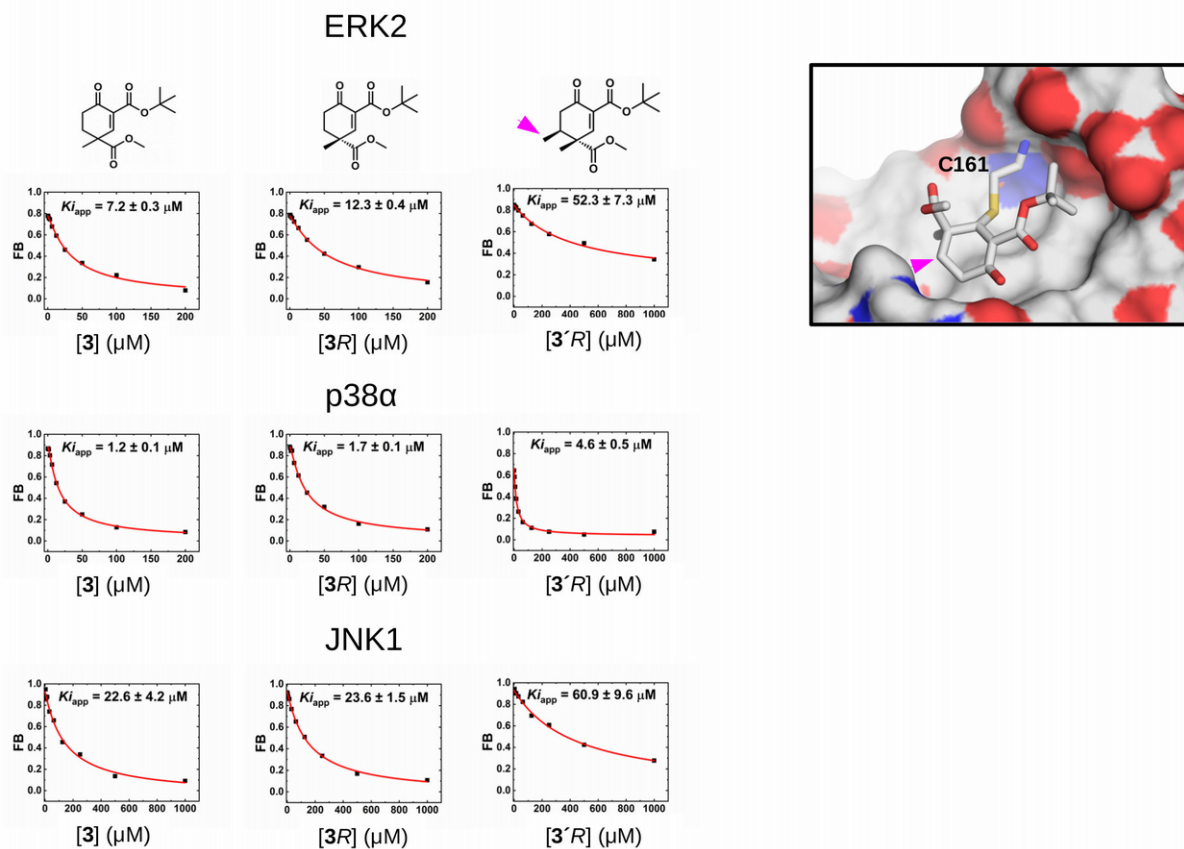

**Supplementary Fig. 9. FP binding results with the 5-methyl derivative of 3R**

Panels show competitive FP binding assay results with ERK2, p38 $\alpha$ , or JNK1 and 3 (racemic), 3R, and 3'R (5-methyl derivative of 3R). The structural panel on the right shows the crystal structure of the ERK2-3R complex. The magenta arrowhead indicates the position of the 5-methyl group which would clash with the rim of the hydrophobic pocket. (C, O, N, and S atoms are colored in gray, red, blue and yellow, respectively. FB: fraction bound.) ( $K_{i,app}$  values indicate the parameter error estimate from weighted least square method; n=3.) Source data are provided as a Source Data file.

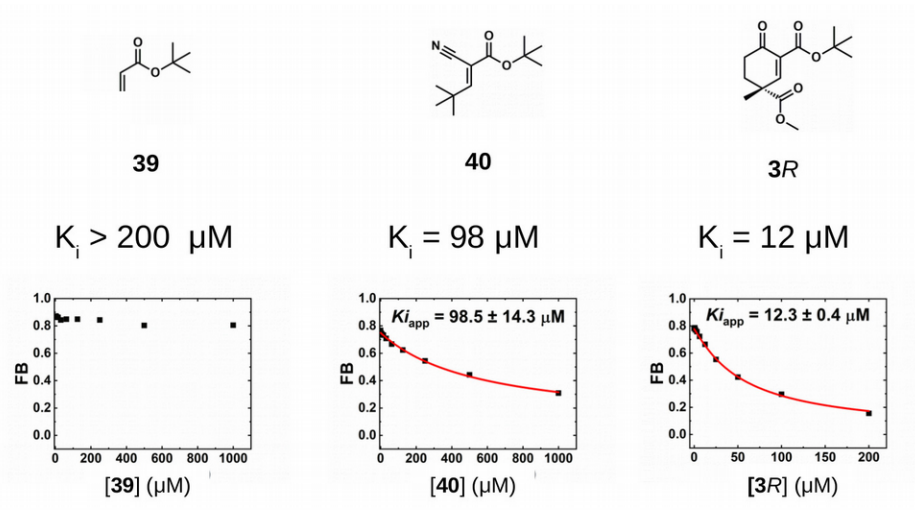

**Supplementary Fig. 10. The cyclic cyclohexenone warhead (3R) is more efficient in targeting the MAPK D-groove cysteine compared to open-chain acryl- or cyanoacrylester**

Panels show the results of FP competitive binding experiments with ERK2. FB: fraction bound.

( $K_{i_{app}}$  values indicate the parameter error estimate from weighted least square method;  $n=3$ .) Source data are provided as a Source Data file.

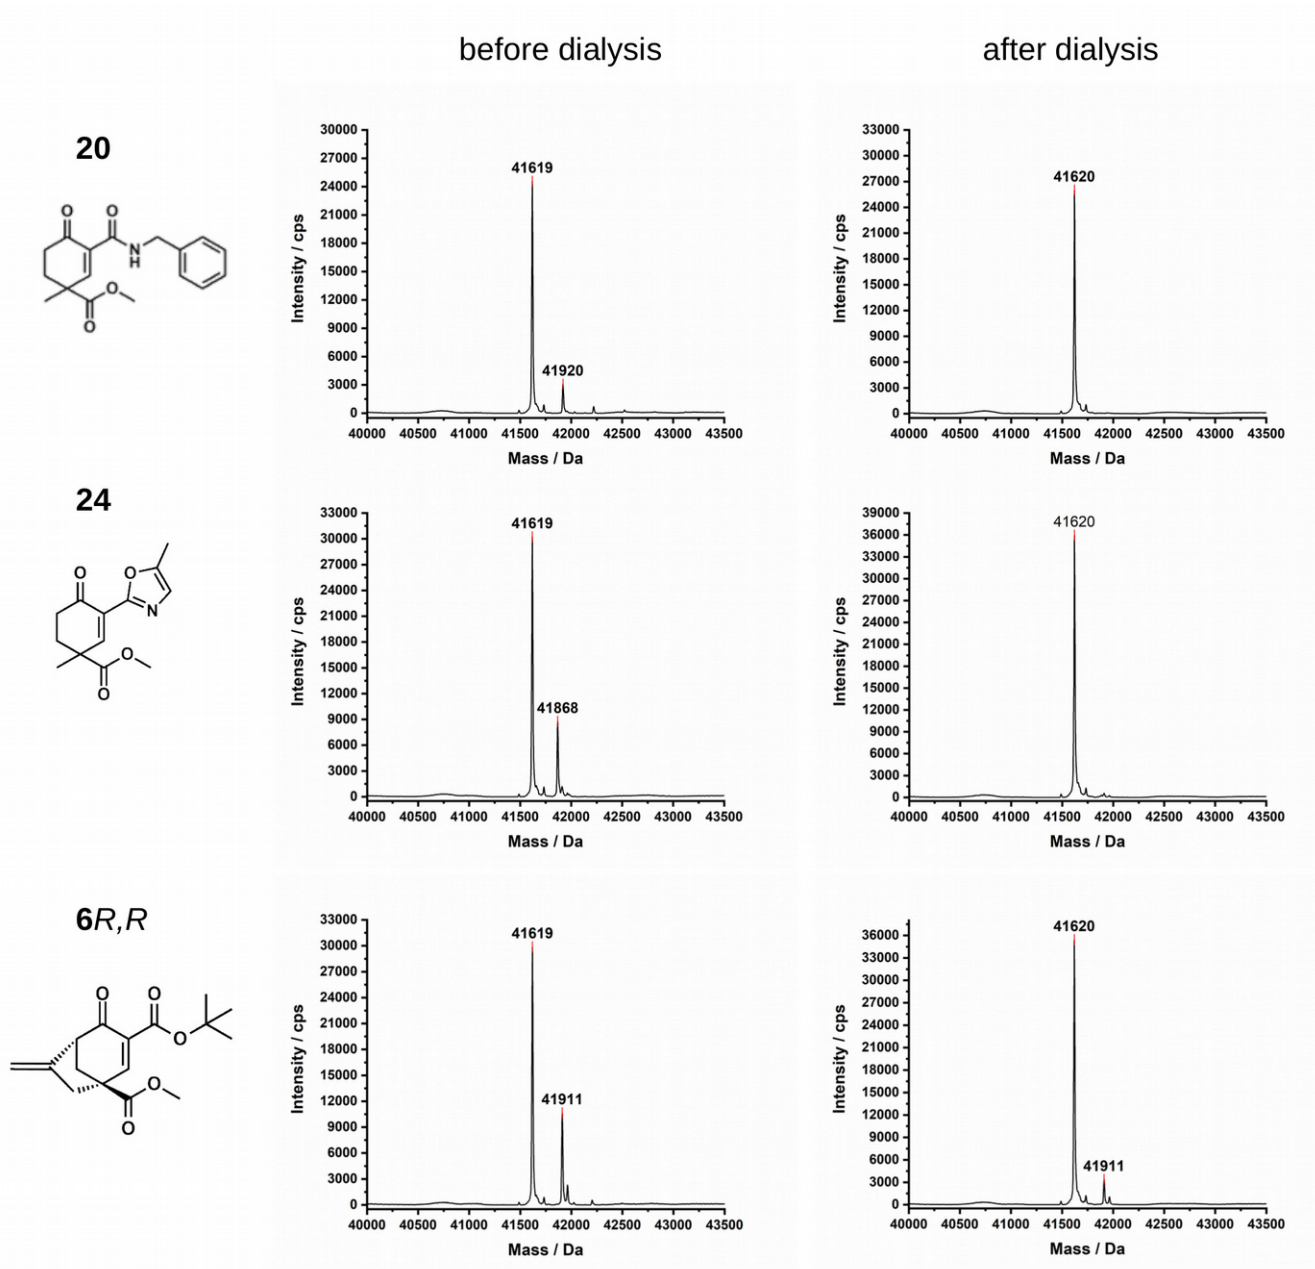

### Supplementary Fig. 11. Reversibility of ERK2-cyclohexenone adduct formation

Panels show the intact mass before (left) and after dialysis (right) for ERK2-**20**, -**24** and -**6R,R** complexes (n=1). 5  $\mu$ M ERK2 was mixed with 50  $\mu$ M compounds and analyzed by LC-MS, then the sample was dialyzed in buffer (20 mM Tris pH=8, 200 mM NaCl, 2 mM TCEP) overnight and analyzed by LC-MS again. Notice that the ratio of the ERK2 intact mass after the dialysis increases, and the ratio of the adduct decreases in the deconvoluted mass spectrum, indicating that protein-adduct formation is reversible.

## ERK2

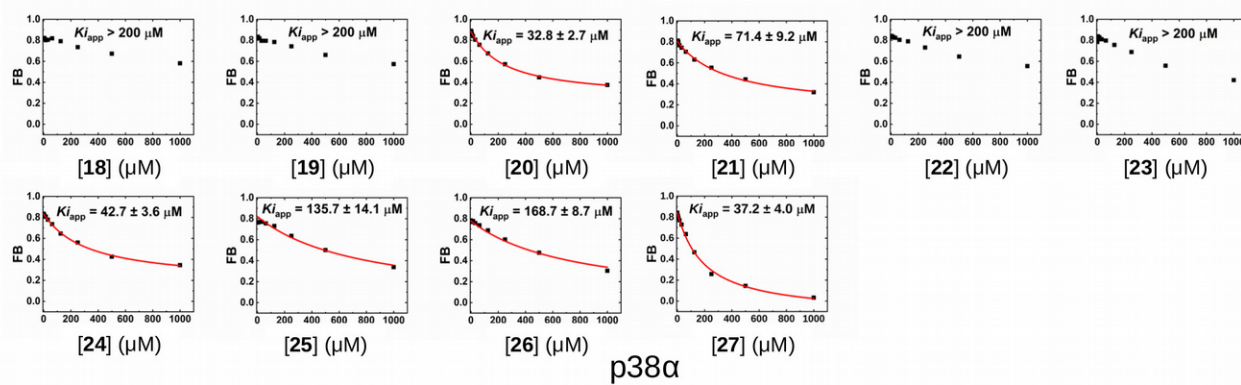

## p38 $\alpha$

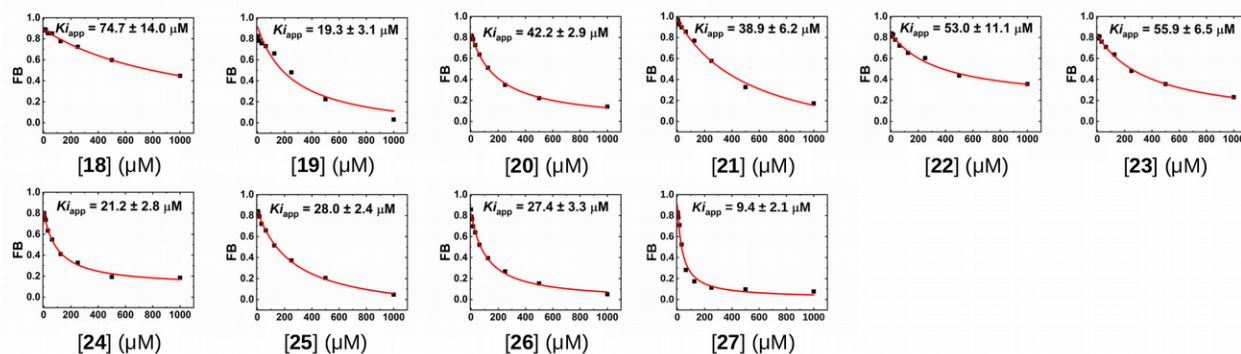

## JNK1

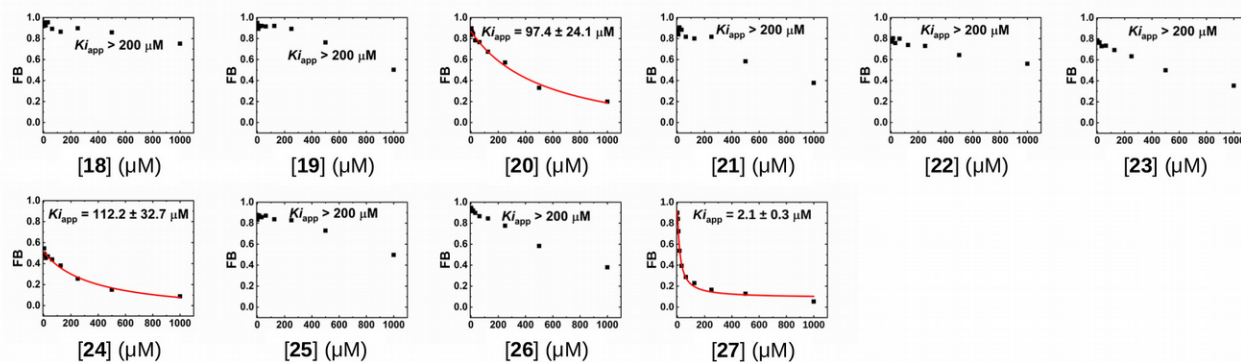

### Supplementary Fig. 12. FP binding results with compounds containing different electron withdrawing groups at C2 or with the cyclopentenone scaffold

Panels show the competitive binding curves for all the measurements summarized in Table 2. FB: fraction bound. ( $K_{i,app}$  values indicate the parameter error estimate from weighted least square method;  $n=3$ .) Source data are provided as a Source Data file.

## ERK2

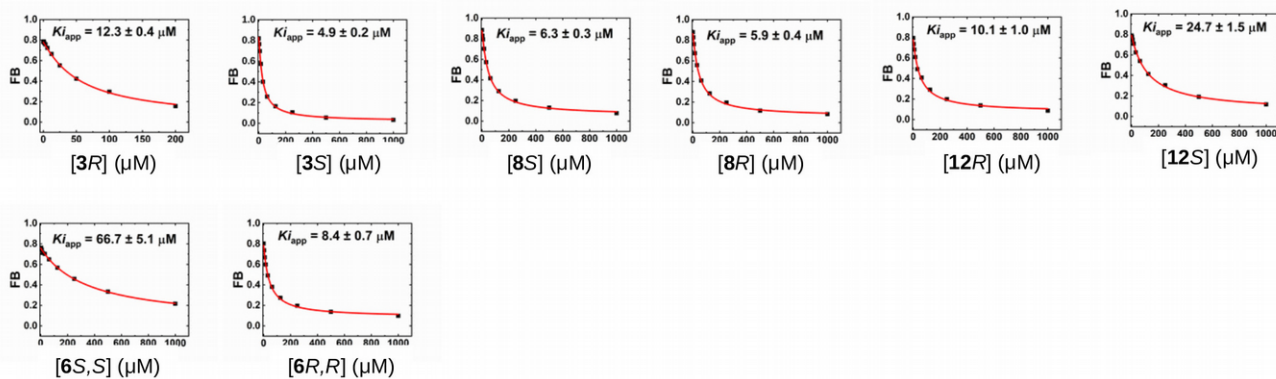

## p38 $\alpha$

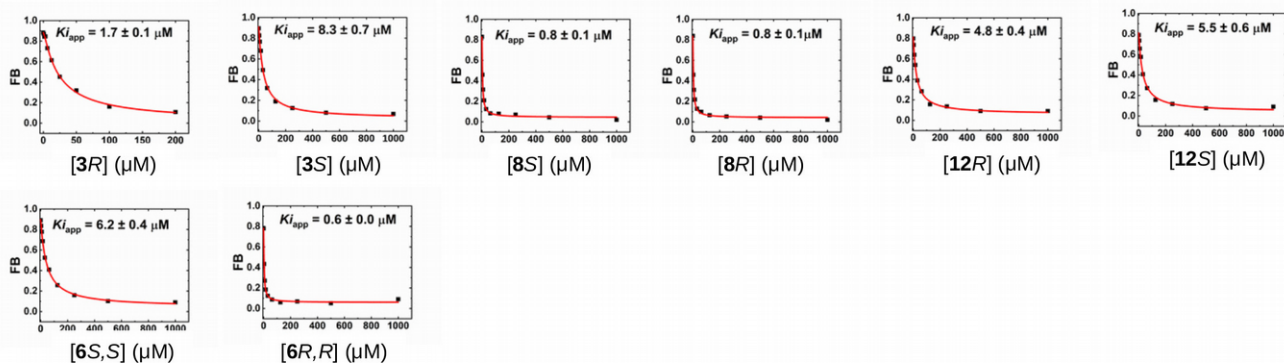

## JNK1

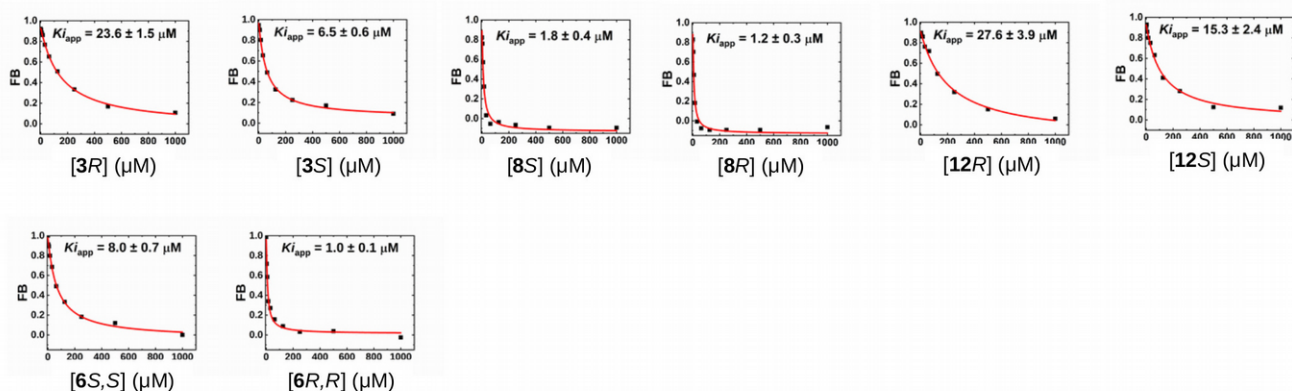

### Supplementary Fig. 13. FP binding assay results with cyclohexenone enantiomers (3R/S, 8R/S, 12R/S, 6S,S/R,R)

Panels show the competitive binding curves for the measurements with ERK2, p38 $\alpha$ , JNK1 and stereoisomers shown in Table 3. FB: fraction bound. ( $K_{i_{app}}$  values indicate the parameter error estimate from weighted least square method;  $n=3$ .) Source data are provided as a Source Data file.

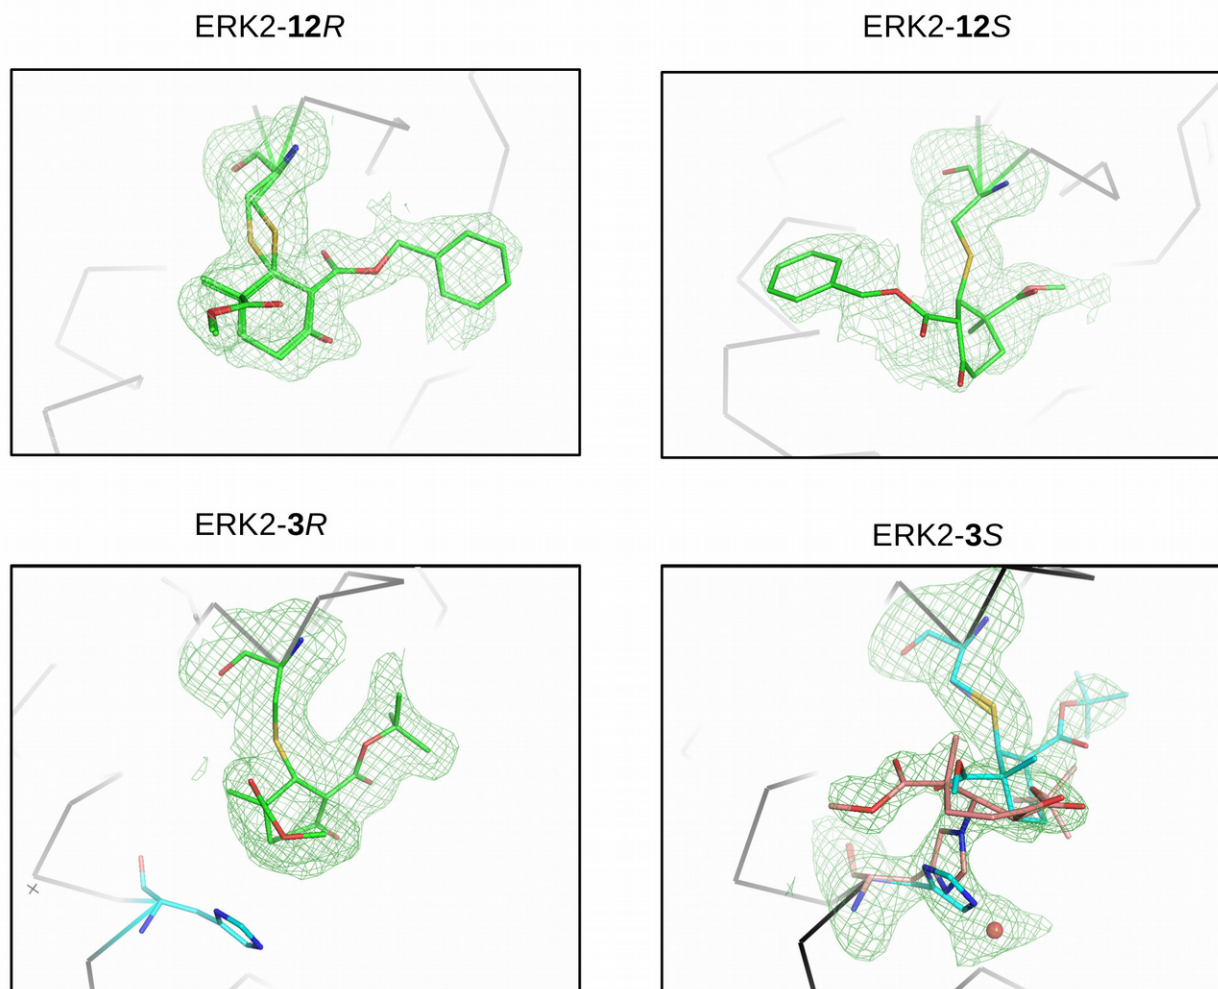

**Supplementary Fig. 14. Simulated annealed omit maps for the ERK2-12R/S and ERK2-3R/S complexes**

Maps are contoured at  $2\sigma$  around the amino acid covalent adducts (Cys161 or His125). In the final crystallographic model for the ERK2-3S complex the molecule forms an adduct with Cys161 (cyan) or with His125 (salmon). The red sphere in the ERK2-3S complex shows a water molecule H-bonded with the 3S-His125 adduct and with the protein backbone (Ser122). The occupancy of these two alternate conformations of the amino acid adducts are roughly equal; set to 0.42-0.58 occupancy by Phenix atomic occupancy refinement.



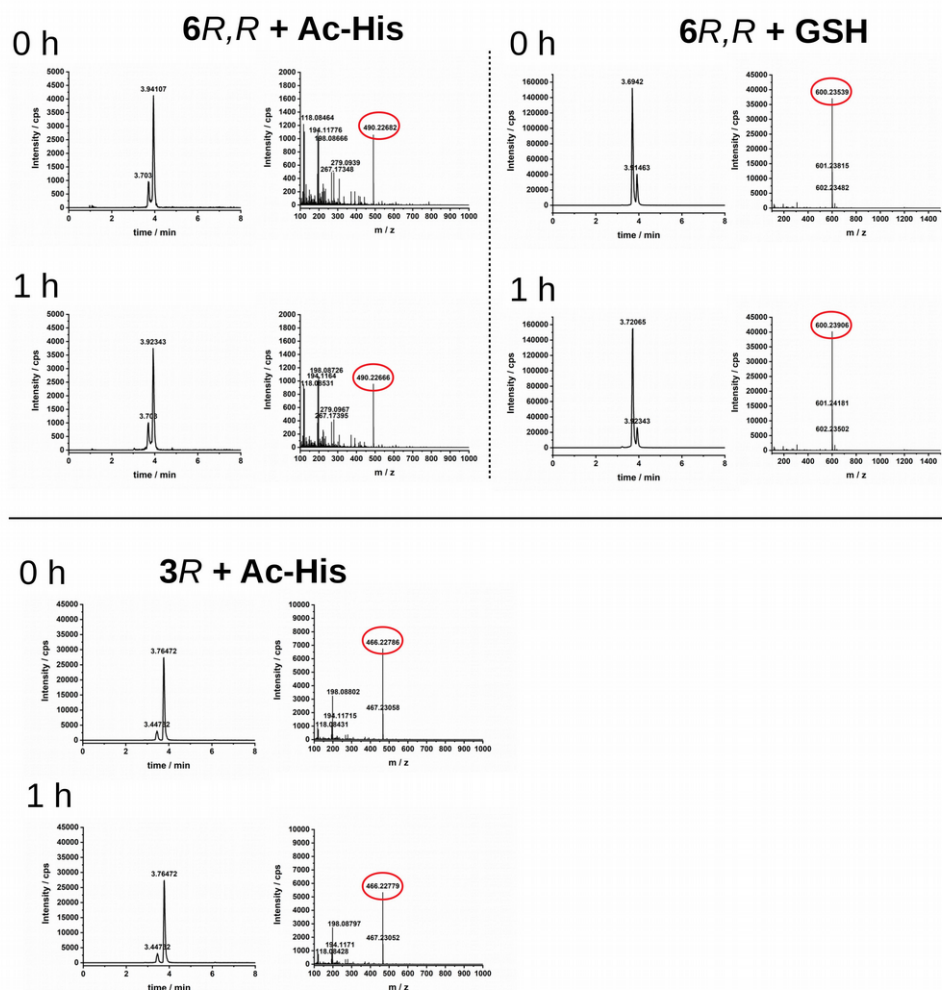

**Supplementary Fig. 15. Covalent adduct formation of 6*R,R* and 3*R* with free histidine (*N*-acetyl-L-histidine, Ac-His) analyzed by mass spectrometry**

10 mM Ac-His (left) was mixed with 50  $\mu$ M 6*R,R* in PBS (pH 7.4) and subjected to LC-MS analysis immediately (0 h, practically 5 minutes) and after 1 hour incubation (1 h). The left panels show the total ion chromatogram while the mass spectra corresponding to the highest peak is shown on the right ( $n=1$ ). Note that the two peaks on the total ion chromatogram correspond to two diastereomers of the adduct, since their mass spectra were identical. The indicated peaks (red circle) in the mass spectra correspond to the exact mass of the 6*R,R*-Ac-His adduct (490 Da). It appears that the adduct forms rapidly under these conditions since there was no significant difference in the combined peak area between 0 or 1 hour incubation (and the spectra did not change after an even longer ( $\sim$  4 hours) incubation time). Note that the enantiomeric excess (ee) of 3*R* or 6*R,R* was  $>99\%$  (see Supplementary Note 3) but adduct formation generates new asymmetric centers. The experiment on the right panels ( $n=1$ ; shown right of the vertical dashed line) shows the same analysis for the 6*R,R*-GSH adduct (600 Da). Here 10 mM GSH was mixed with 50  $\mu$ M 3*R* in PBS (pH 7.4) and subjected to LC-MS analysis the same way as above ( $n=1$ ). The experiment shown on the lower panels ( $n=1$ ) below the solid line demonstrates that the 3*R*-Ac-His adduct (466 Da) can also form and was detected by LC-MS analysis similarly as shown for the 3*R*-GSH adduct (see Supplementary Fig. 6). Here 10 mM GSH was mixed with 50  $\mu$ M 3*R* in PBS (pH 7.4) and subjected to LC-MS analysis the same way as above.

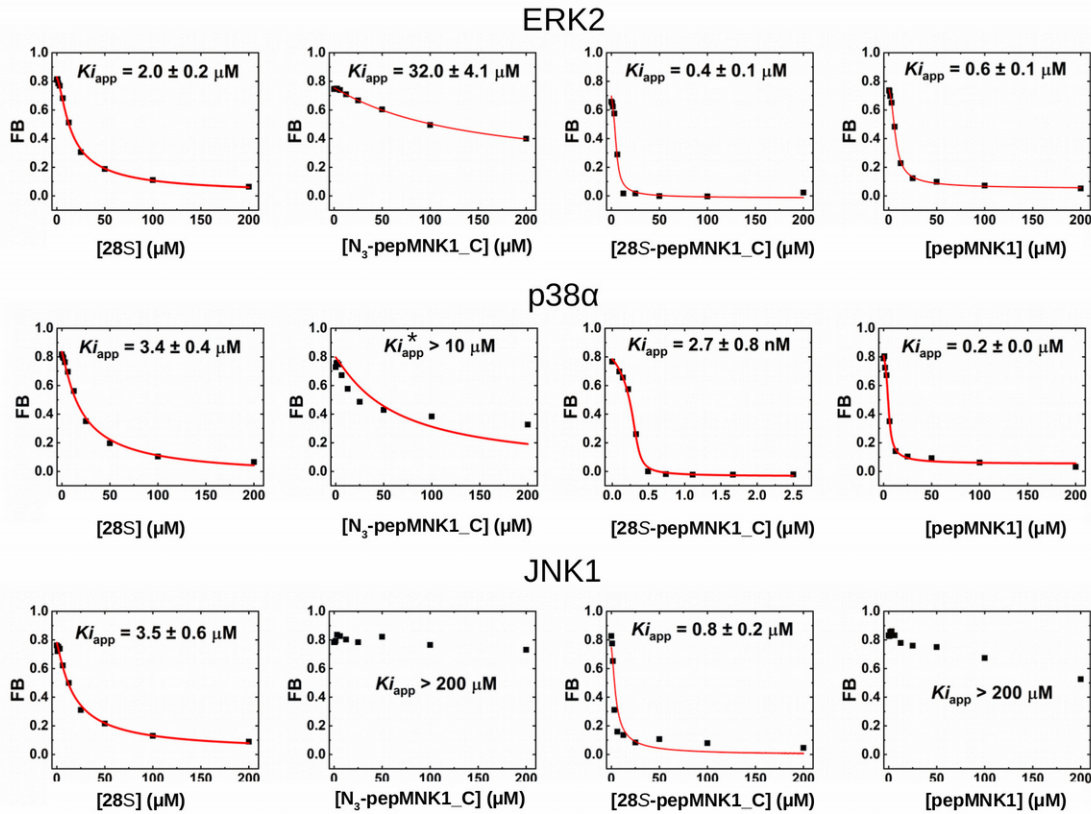

| Name \ Ki (μM)            | ERK2 | p38α         | JNK1 |
|---------------------------|------|--------------|------|
| 28S                       | 2.0  | 3.4          | 3.5  |
| N <sub>3</sub> -pepMNK1_C | 32   | >10          | >200 |
| 28S-pepMNK1_C             | 0.4  | <b>0.003</b> | 0.8  |
| pepMNK1                   | 0.6  | 0.2          | >200 |

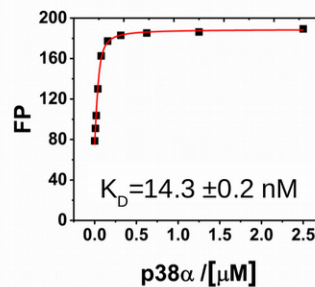

**Supplementary Fig. 16. FP binding results with 28S, peptides and 28S-peptide chimeras**  
 Panels show the competitive binding curves for the measurements with ERK2, p38α, and JNK1 summarized in the table below. FB: fraction bound. \*: competition is incomplete,  $K_{i,app}$  is only estimated. The panel on the right to the table shows the results of a direct binding experiment with p38α and carboxyfluorescein labeled 28S-pepMNK1\_C peptide. This confirms the low nanomolar binding affinity of the 28S-peptide chimera in a direct binding experiment (FP: fluorescence polarization in arbitrary units;  $K_D = 14 \text{ nM}$ ;  $n=3$ ). ( $K_{i,app}$  values indicate the parameter error estimate from weighted least square method;  $n=3$ .) Source data are provided as a Source Data file.

## 28S-pepMNK1\_C

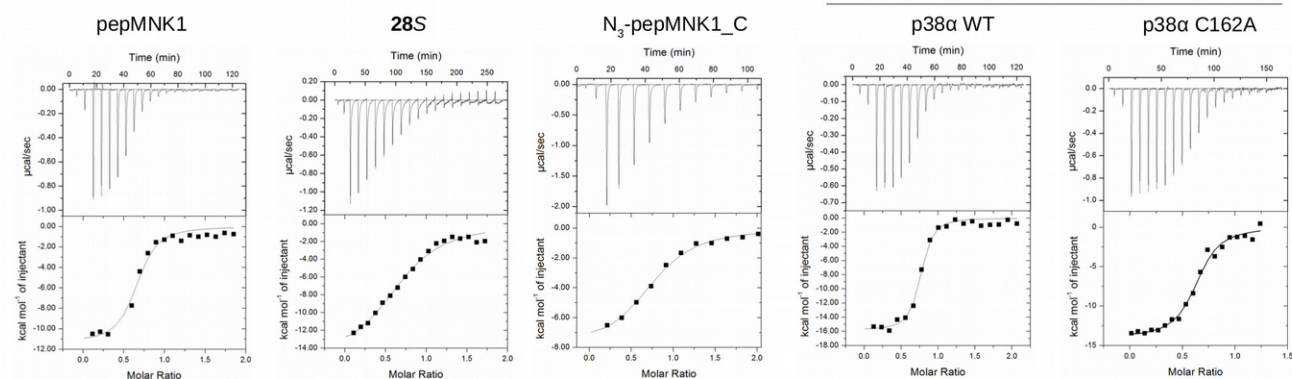

p38α WT

p38α C162A

|                                   | pepMNK1                                     | 28S                                         | N <sub>3</sub> -pepMNK1_C                   | 28S-pepMNK1_C                               | 28S-pepMNK1_C                               |
|-----------------------------------|---------------------------------------------|---------------------------------------------|---------------------------------------------|---------------------------------------------|---------------------------------------------|
| N                                 | 0.64 ± 0.02                                 | 0.71 ± 0.03                                 | 0.73 ± 0.02                                 | 0.73 ± 0.01                                 | 0.63 ± 0.01                                 |
| K <sub>a</sub> (M <sup>-1</sup> ) | 2.11*10 <sup>6</sup> ± 7.54*10 <sup>5</sup> | 1.13*10 <sup>5</sup> ± 2.04*10 <sup>4</sup> | 1.72*10 <sup>5</sup> ± 2.31*10 <sup>4</sup> | 1.18*10 <sup>7</sup> ± 2.90*10 <sup>6</sup> | 1.68*10 <sup>6</sup> ± 3.37*10 <sup>5</sup> |
| K <sub>d</sub> (µM)               | 0.47                                        | 8.85                                        | 5.81                                        | 0.085                                       | 0.596                                       |
| ΔH (kcal/mol)                     | -11.34 ± 0.50                               | -15.42 ± 0.88                               | -8.12 ± 0.32                                | -15.83 ± 0.33                               | -14.00 ± 0.33                               |
| -TΔS (kcal/mol)                   | 2.48                                        | 7.81                                        | 0.90                                        | 5.65                                        | 5.42                                        |

**Supplementary Fig. 17. Results of ITC measurements with p38α.**

Isothermal calorimetry (ITC) can be used to measure the contribution of enthalpy (ΔH) and the entropic cost (TΔS) of binding free energy (ΔG). N: stoichiometry of binding (~1), K<sub>a</sub> and K<sub>d</sub>: equilibrium association and dissociation constants, respectively (n=1).

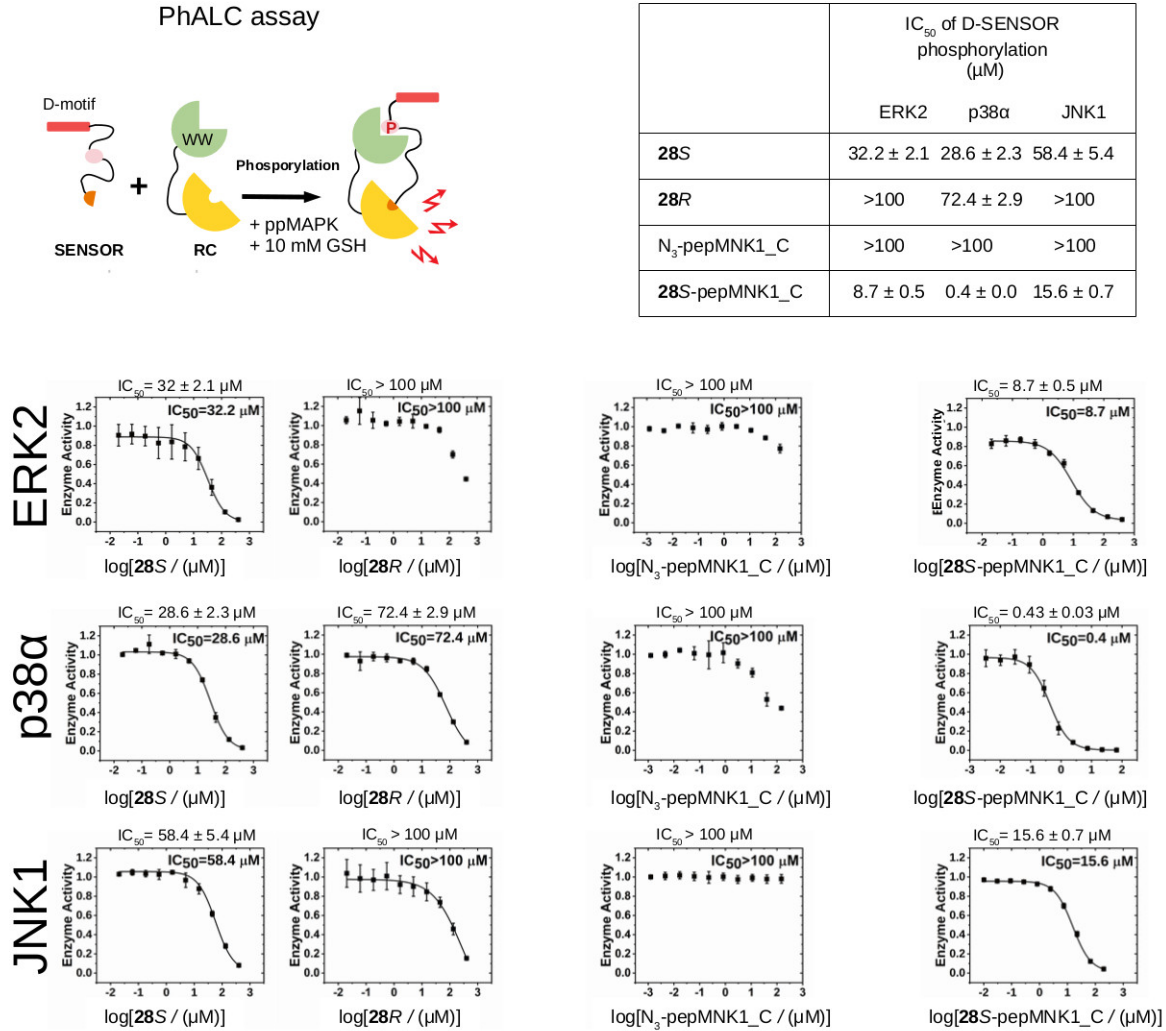

**Supplementary Fig. 18. Results of MAPK IC<sub>50</sub> measurements carried out using the PhALC assay.** The scheme shows the concept of the luciferase complementation based PhALC assay and the table on the right shows the summary of the IC<sub>50</sub> values; while the panels below show the IC<sub>50</sub> curves determined with this kinase activity assay. The assay was carried out using the D-SENSOR (MEF2A) in the presence of 10 mM GSH with pepMNK1, **28S**, N<sub>3</sub>-pepMNK1\_C, **28S-pepMNK1\_C** and MAPKs (see Fig. 5c). (Data points show the mean and error bars show the SD based on three independent experiments. IC<sub>50</sub> values above the panels indicate the parameter error estimate from weighted least square method; n=3) Source data are provided as a Source Data file.

## ERK2

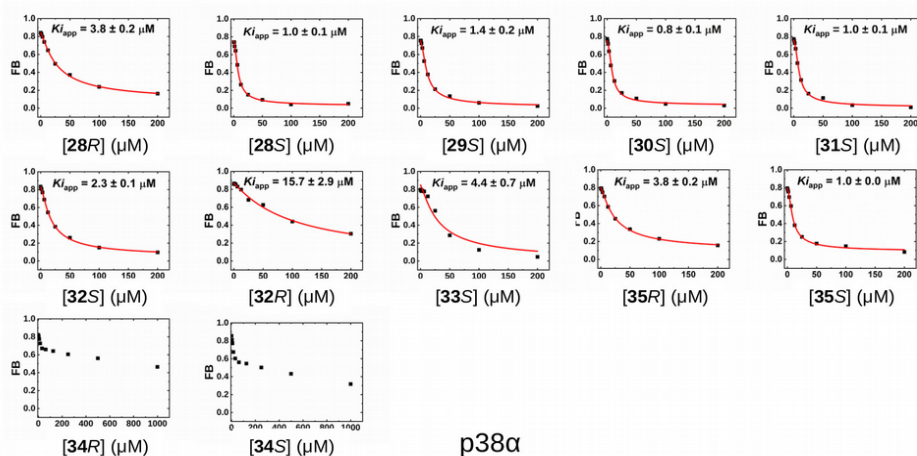

## p38 $\alpha$

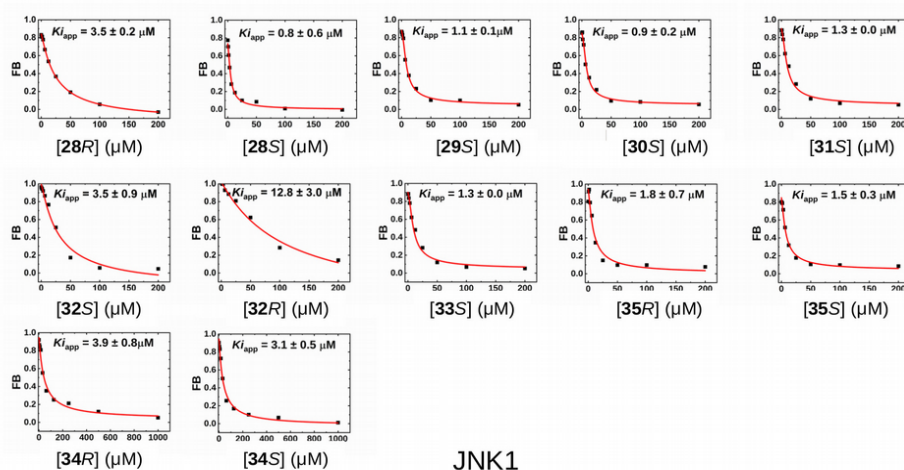

## JNK1

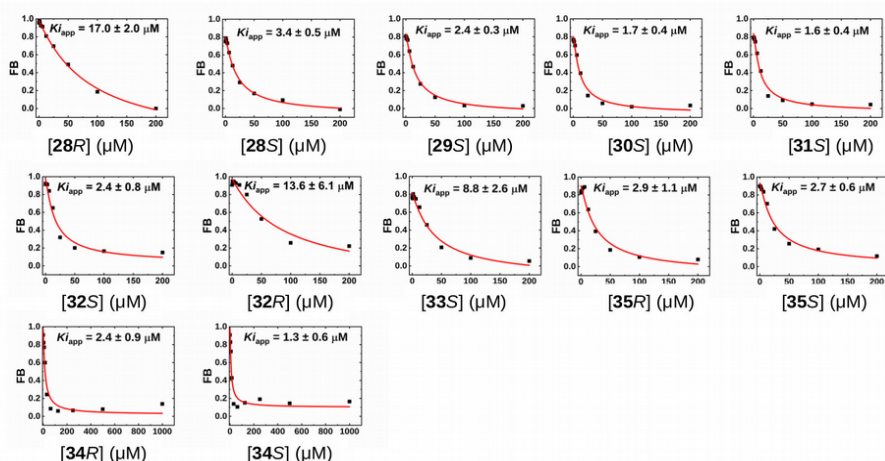

### Supplementary Fig. 19. FP binding results with extended cyclohexenone scaffold containing compounds

Panels show the competitive binding curves for the measurements with ERK2, p38 $\alpha$ , and JNK1 summarized in Table 4. FB: fraction bound. ( $K_{i\text{app}}$  values indicate the parameter error estimate from weighted least square method;  $n=3$ .) Source data are provided as a Source Data file.

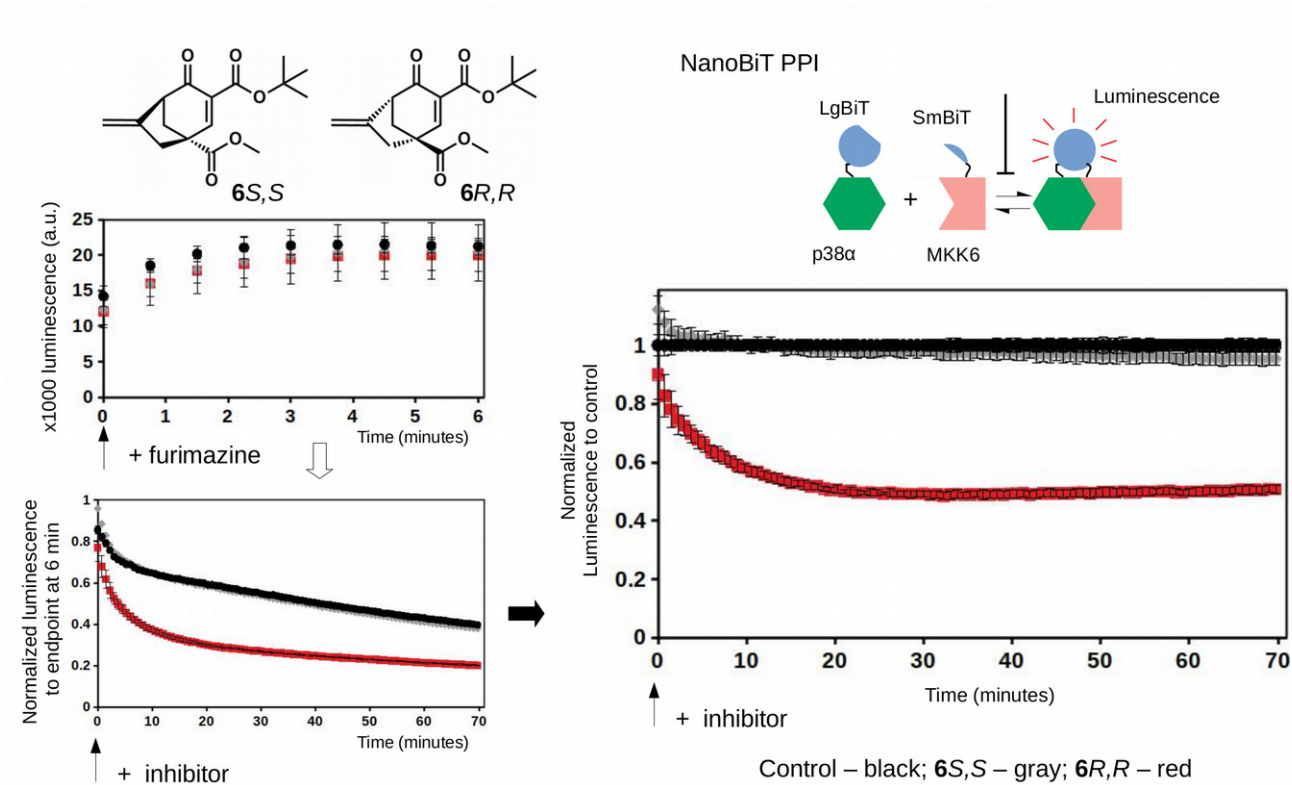

**Supplementary Fig. 20. NanoBiT protein-protein interaction (PPI) assay in live HEK293T cells to monitor inhibitor uptake (6R,R) and target engagement in time**

Cells were transfected with p38α-LgBit and MKK6-SmBiT construct and furimazine (a stable luciferase substrate) was added to cells after 24 hours (upper left panel; up to this point all wells were treated the same, albeit colored differently in triplicates to indicate wells destined for different later treatments: control, +6S,S or +6R,R). After the luminescence signal reached a steady level (~ 6 minutes), 10 μM inhibitor (or DMSO, 0.05%; Control) was added to cells and the signal was normalized to the luminescence value obtained at 6 minutes (left panel below). The panel on the right shows the luminescence signal normalized to Control. 6R,R efficiently blocks MKK6-p38 binding already after 15 minutes, while its enantiomer (6S,S) does not affect this interaction. (Note that the fast drop at the second panel is because of dilution of the media with the inhibitor, and the shallow decrease of the signal later is due to constant time-dependent degradation of furimazine, which are all corrected for in the last panel.) Data represents the mean and error bars indicate SD (n=3; luminescence is measured in arbitrary units). Source data are provided as a Source Data file.

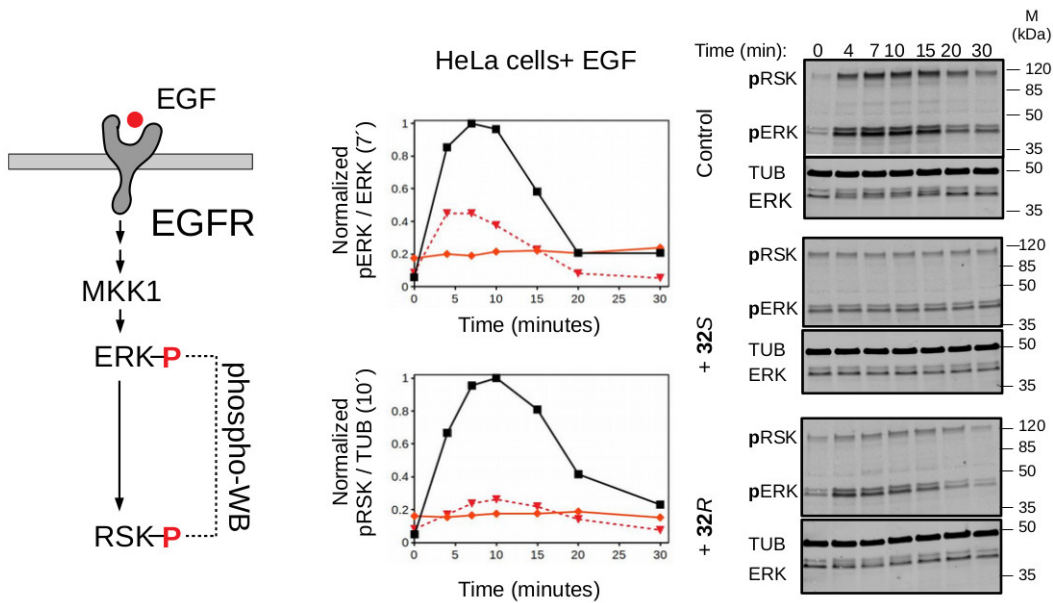

**Supplementary Fig. 21. EGF stimulation of HeLa cells and the effect of 32S or 32R on ERK and RSK phosphorylation**

HeLa cells were incubated with inhibitors (10  $\mu$ M) for 1.5 hours before stimulation with 100 ng/mL EGF. The plots show the western blot (WB) signal of pERK/ERK normalized to control (Cont) at 7 minutes or the pRSK/tubulin signal normalized to the control at 10 minutes. Panels at the right show one set of western blot results. (pRSK: phosphoRSK antibody, pERK: phosphoERK antibody, ERK: anti-ERK antibody, TUB: anti-tubulin antibody as load control). Experiments were done in duplicates (n=2), data represents the mean. Source data are provided as a Source Data file.

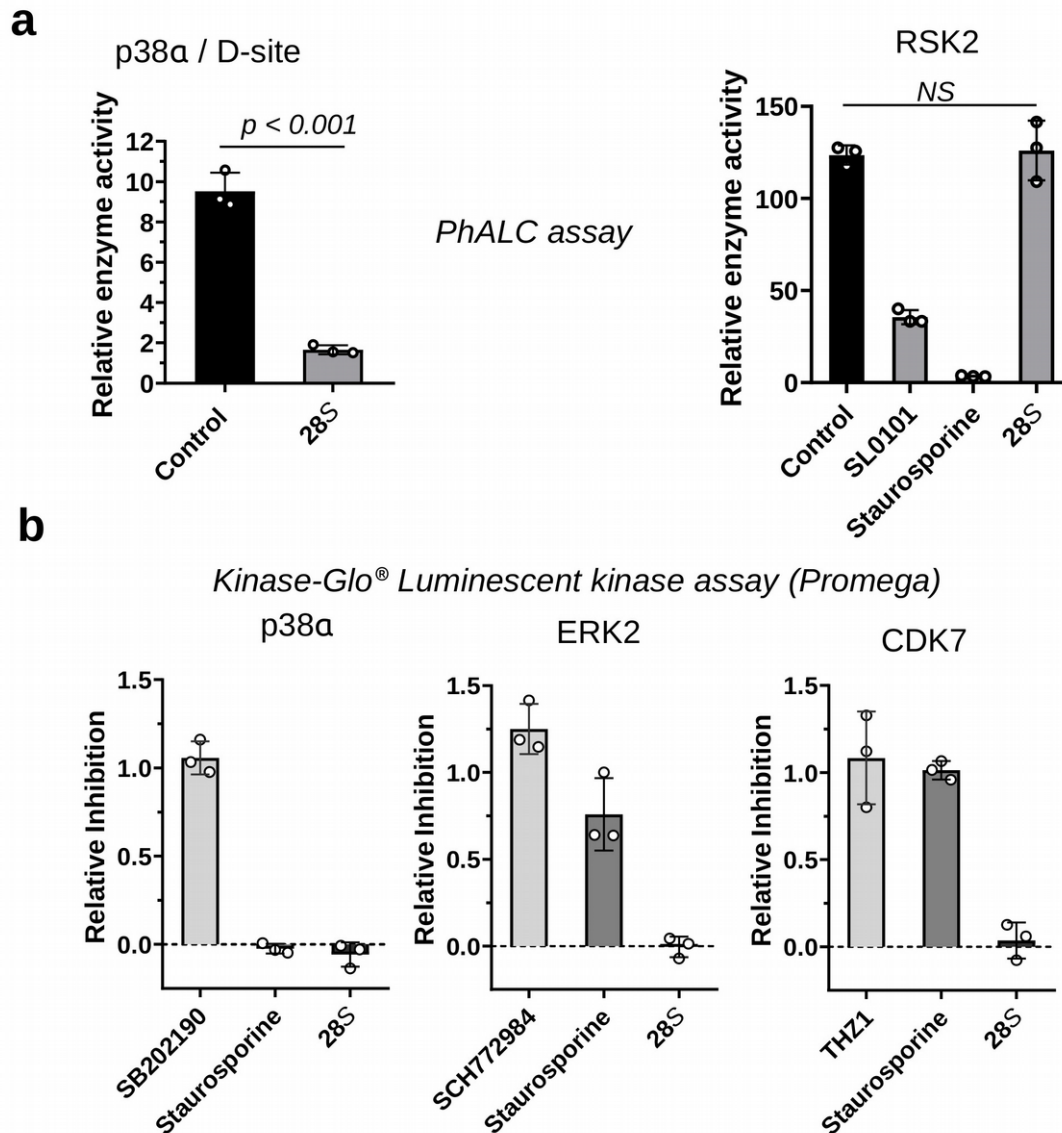

**Supplementary Fig. 22. Results of selectivity tests with 28S.**

(a) The left panel shows the results of in vitro PhALC assay experiments with a D-SENSOR construct whose phosphorylation is dependent on intact p38 docking<sup>1</sup>. (Control shows the relative activity for the reaction with active kinase normalized to the signal of the test without kinase added; **28S**: 10  $\mu$ M inhibitor was added that efficiently blocked docking and thus inhibited phosphorylation assisted luciferase complementation (PhALC); Relative enzyme activity: the luminescence kinetic slope was normalized to that of the reaction which did not have active enzyme added.) The right panel shows a PhALC experiment with RSK-SENSOR (capable of detecting RSK2-mediated phosphorylation<sup>1</sup>. (Control shows the relative activity for the uninhibited reaction; this was normalized to the reaction which did not have any active kinase added; SL0101, staurosporine, and **28S** show the results with an RSK-specific or nonselective ATP-competitive inhibitor, or with the MAPK docking inhibitor respectively, all used in 10  $\mu$ M concentration). Data represents the mean and error bars show SD (n=3). Notice, that the ATP-competitive inhibitors both inhibit RSK2 activity, while **28S** does not have this effect, as expected. (p-value: two-sided, unpaired t-test; NS: not significant).



(b) Results of Kinase-Glo Luminescent kinase assay with p38 $\alpha$ , ERK2 and CDK7. Note that this assay monitors kinase activity by monitoring ATP co-factor decrease and the graphs show relative inhibition compared to the test containing no kinase. The experiments were carried out using specific inhibitors (e.g., SB202190, SCH772984, or THZ1 for p38 $\alpha$ , ERK2 and CDK7, respectively), the non-specific ATP-competitive staurosporine as well as the MAPK D-groove binding **28S** compound. All compounds were used in 10  $\mu$ M concentration. Note that **28S** did not inhibit the intrinsic kinase activity of the kinases, while the specific inhibitors or staurosporine, depending on its specificity profile, were effective. Data represents the mean and error bars show SD (n=3).

The more detailed description of the Kinase-Glo experiments is the following: The Kinase-Glo Max assay kit (Promega, Madison, WI; catalog no. V6071) was used to screen compounds for inhibition of CDK7/cyclin H/MNAT1, p38 $\alpha$ , and ERK2. The enzymes CDK7/cyclin H/MNAT1 (catalog no. VA7402) were purchased from Promega, and the active MAPKs (p38 $\alpha$  and ERK2) were produced in-house as previously described<sup>1</sup>. The kinase reaction system contained 25 ng/ $\mu$ L CDK7/cyclin H kinase, 10  $\mu$ M of compounds, and 167  $\mu$ g/ $\mu$ L kinase substrate (Native Swine Myelin Basic Protein) with 20  $\mu$ M ATP in the case of CDK7 and 50  $\mu$ M in the case of MAPKs. The reaction in each well was started immediately by adding ATP, followed by incubation for one hour at 25  $^{\circ}$ C. Then, 6  $\mu$ L of Kinase-Glo Max reagent was added to each well, followed by 10 minutes of incubation. The luminescence signal was measured using a BioTek Cytation 3 microplate reader. After the signal was stable, the data were collected for five minutes. Data averages were normalized against control measurements both with and without kinase. Subsequently, the normalized data were plotted using the GraphPad Prism 8.0.1. software. Source data are provided as a Source Data file.

**Supplementary Table 1. Details of crystallization, crystallographic data collection and structure refinement**

|                                                       | ERK2-<br>SynthRev<br>D <sup>COV</sup> | ERK2-<br>8S                                   | ERK2-<br>8R                                   | ERK2-<br>12R                                  | ERK2-<br>12S                                  | ERK2-<br>3R                                   | ERK2-<br>3S                                   | ERK2-<br>6R,R                                 |
|-------------------------------------------------------|---------------------------------------|-----------------------------------------------|-----------------------------------------------|-----------------------------------------------|-----------------------------------------------|-----------------------------------------------|-----------------------------------------------|-----------------------------------------------|
| <b>Data collection</b>                                |                                       |                                               |                                               |                                               |                                               |                                               |                                               |                                               |
| Space group                                           | P6 <sub>5</sub>                       | P2 <sub>1</sub> 2 <sub>1</sub> 2 <sub>1</sub> |
| Cell dimensions<br><i>a</i> , <i>b</i> , <i>c</i> (Å) | 62.13,<br>62.13,<br>214.98            | 41.47,<br>77.39,<br>127.22                    | 41.90,<br>78.33,<br>127.14                    | 41.49,<br>77.05,<br>123.39                    | 41.58,<br>77.15,<br>123.68                    | 41.65,<br>76.86,<br>124.92                    | 41.44,<br>76.84,<br>123.32                    | 41.94,<br>78.47,<br>122.74                    |
| $\alpha$ , $\beta$ , $\gamma$ (°)                     | 90, 90,<br>120                        | 90, 90,<br>90                                 |
| Resolution range<br>(Å)                               | 43.03-<br>1.85                        | 49.14-<br>2.0                                 | 49.36-<br>2.55                                | 38.52 -<br>1.65                               | 48.25 -<br>1.8                                | 48.47 -<br>1.9                                | 61.66-<br>1.95                                | 48.34 -<br>1.80                               |
| CC <sub>1/2</sub> *                                   | 0.998<br>(0.783)                      | 0.998<br>(0.871)                              | 0.998<br>(0.636)                              | 0.999<br>(0.718)                              | 0.999<br>(0.780)                              | 0.999<br>(0.693)                              | 0.999<br>(0.567)                              | 1.000<br>(0.560)                              |
| R <sub>merge</sub> †                                  | 0.19<br>(1.75)                        | 0.16<br>(1.68)                                | 0.16<br>(1.52)                                | 0.097<br>(1.42)                               | 0.12<br>(1.32)                                | 0.06<br>(0.81)                                | 0.13<br>(3.42)                                | 0.063<br>(2.041)                              |
| <i>I</i> / $\sigma$ <i>I</i>                          | 12.0<br>(1.6)                         | 10.5<br>(1.6)                                 | 11.8<br>(1.5)                                 | 14.0<br>(1.4)                                 | 13.4<br>(1.6)                                 | 12.8<br>(1.7)                                 | 12.3<br>(0.9)                                 | 20.3<br>(1.4)                                 |
| Completeness (%)                                      | 99.7<br>(99.3)                        | 100<br>(100)                                  | 99.9<br>(100)                                 | 100<br>(100)                                  | 100<br>(100)                                  | 91.7<br>(90.8)                                | 100<br>(100)                                  | 100<br>(100)                                  |
| Redundancy                                            | 20.0<br>(19.9)                        | 11.8<br>(11.4)                                | 11.6<br>(12.1)                                | 12.5<br>(12.6)                                | 12.7<br>(12.4)                                | 4.6<br>(3.9)                                  | 13.4<br>(13.7)                                | 13.3<br>(13.2)                                |
| No. reflections                                       | 39751                                 | 28489                                         | 14259                                         | 48499                                         | 37729                                         | 29741                                         | 29520                                         | 38411                                         |
| <b>Refinement</b>                                     |                                       |                                               |                                               |                                               |                                               |                                               |                                               |                                               |
| R <sub>work</sub> / R <sub>free</sub>                 | 0.1795 /<br>0.2056                    | 0.1892 /<br>0.2147                            | 0.1897 /<br>0.2318                            | 0.1768 /<br>0.2069                            | 0.1791 /<br>0.2064                            | 0.1904 /<br>0.2240                            | 0.2039 /<br>0.2354                            | 0.1867/<br>0.2222                             |
| No. atoms                                             | 3346                                  | 2912                                          | 2832                                          | 3340                                          | 3206                                          | 2921                                          | 2917                                          | 3032                                          |
| Protein                                               | 3025                                  | 2755                                          | 2761                                          | 2962                                          | 2939                                          | 2738                                          | 2756                                          | 2810                                          |
| Ligand/ion                                            | 37                                    | 52                                            | 52                                            | 81                                            | 53                                            | 46                                            | 86                                            | 70                                            |
| Water                                                 | 284                                   | 105                                           | 19                                            | 297                                           | 214                                           | 137                                           | 75                                            | 152                                           |
| B-factors (Å <sup>2</sup> )                           | 41.66                                 | 53.46                                         | 70.57                                         | 38.27                                         | 44.87                                         | 52.45                                         | 48.93                                         | 44.14                                         |
| Protein                                               | 41.72                                 | 53.56                                         | 70.77                                         | 37.82                                         | 44.64                                         | 52.47                                         | 49.15                                         | 43.74                                         |
| Ligand/ion                                            | 25.48                                 | 57.93                                         | 63.05                                         | 39.67                                         | 58.67                                         | 58.36                                         | 46.37                                         | 59.24                                         |
| Water                                                 | 43.18                                 | 48.43                                         | 62.40                                         | 42.42                                         | 44.73                                         | 50.10                                         | 44.08                                         | 44.43                                         |
| <b>Ramachandran</b>                                   |                                       |                                               |                                               |                                               |                                               |                                               |                                               |                                               |
| Favored (%)                                           | 96.97 %                               | 96.41 %                                       | 97.32 %                                       | 97.98 %                                       | 97.69 %                                       | 96.94 %                                       | 98.18 %                                       | 97.35 %                                       |
| Allowed (%)                                           | 3.03 %                                | 3.59 %                                        | 2.68 %                                        | 2.02 %                                        | 2.31 %                                        | 3.06 %                                        | 1.82 %                                        | 2.65 %                                        |
| Outliers (%)                                          | 0.00 %                                | 0.00 %                                        | 0.00 %                                        | 0.00 %                                        | 0.00 %                                        | 0.00 %                                        | 0.00 %                                        | 0.00 %                                        |
| <b>R.m.s deviations</b>                               |                                       |                                               |                                               |                                               |                                               |                                               |                                               |                                               |
| Bond lengths (Å)                                      | 0.008                                 | 0.004                                         | 0.008                                         | 0.012                                         | 0.009                                         | 0.006                                         | 0.006                                         | 0.011                                         |
| Bond angles (°)                                       | 0.995                                 | 0.617                                         | 1.021                                         | 1.163                                         | 1.049                                         | 0.769                                         | 0.931                                         | 1.061                                         |
| PDB ID                                                | 8PSR                                  | 8PSW                                          | 8PSY                                          | 8PT0                                          | 8PT1                                          | 8PST                                          | 8PT5                                          | 8PT3                                          |

\*Values for the highest resolution bin is shown in parentheses

†R<sub>merge</sub> =  $\sum_{hkl} \sum_i |I_i(hkl) - \langle I(hkl) \rangle| / \sum_{hkl} \sum_i I_i(hkl)$

**Supplementary Table 2. Structures of Group1-7 compounds**

|      |  |      |  |      |  |         |  |         |  |         |
|------|--|------|--|------|--|---------|--|---------|--|---------|
| MA1  |  |      |  |      |  | Group 1 |  |         |  |         |
| MA2  |  | MA3  |  | MA4  |  | MA5     |  | MA6     |  |         |
| MA7  |  | MA8  |  | MA9  |  | MA10    |  | MA11    |  | Group 2 |
| MA12 |  | MA13 |  |      |  |         |  | Group 2 |  |         |
| MA14 |  | MA15 |  | MA16 |  | MA17    |  | MA18    |  | Group 3 |
| MA19 |  | MA20 |  | MA21 |  | MA22    |  | MA23    |  |         |
| MA24 |  | MA25 |  | MA26 |  | MA27    |  | MA28    |  |         |
| MA29 |  | MA30 |  |      |  |         |  |         |  |         |
| MA31 |  | MA32 |  | MA33 |  | MA34    |  | MA35    |  | Group 4 |
| MA36 |  | MA37 |  | MA38 |  | MA39    |  | MA40    |  |         |
| MA41 |  | MA42 |  | MA43 |  | MA44    |  | MA45    |  |         |
| MA46 |  |      |  |      |  |         |  |         |  |         |
| MA47 |  | MA48 |  | MA49 |  | MA50    |  | MA51    |  | Group 5 |
| MA52 |  | MA53 |  | MA54 |  |         |  |         |  | Group 6 |
| MA55 |  | MA56 |  | MA57 |  | MA58    |  | MA59    |  | Group 7 |
| MA60 |  | MA61 |  | MA62 |  | MA63    |  | MA64    |  |         |
| MA65 |  | MA66 |  | MA67 |  | MA68    |  | MA69    |  |         |
| MA70 |  | MA71 |  | MA72 |  | MA73    |  | MA74    |  |         |
| MA75 |  | MA76 |  |      |  |         |  |         |  |         |

**Supplementary Table 3. List of oligonucleotides used for cloning**

|                               |                                                                                                                                                                                                                                   |
|-------------------------------|-----------------------------------------------------------------------------------------------------------------------------------------------------------------------------------------------------------------------------------|
| <b>Mutagenesis oligos</b>     | On wild-type bacterial expression plasmids                                                                                                                                                                                        |
| ERK2_H125R_Forw               | ACA CAA CAC CTC AGC AAT GAC AGG ATC TGC TAT TTT CTC TAC CAG                                                                                                                                                                       |
| ERK2_H125R_Rev                | CTG GTA GAG AAA ATA GCA GAT CCT GTC ATT GCT GAG GTG TTG TGT                                                                                                                                                                       |
| ERK2_H1254R_Forw              | CACCTCAGCAATGACCGTATCTGCTATTTTTCTCTACC                                                                                                                                                                                            |
| ERK2_H1254R_Rev               | GGTAGAGAAAATAGCAGATACGGTCATTGCTGAGGTG                                                                                                                                                                                             |
| p38a_H126L_Forw               | CAGAAGCTTACAGATGACCTTGTTTCAGTTCCTTATCTAC                                                                                                                                                                                          |
| p38a_H126L_Rev                | GTAGATAAGGAAGTGAACAAGGTCATCTGTAAGCTTCTG                                                                                                                                                                                           |
| p38a_C162A_Forw               | CTAGCTGTGAATGAAGACAGTGAGCTGAAGATTCTGG                                                                                                                                                                                             |
| p38a_C162A_Rev                | CCAGAATCTTCAGCTCACTGTCTTCATTCACAGCTAG                                                                                                                                                                                             |
| p38a_C119V_Forw               | CTGAACAACATTGTGAAAGTTCAGAAGCTTACAGATGACC                                                                                                                                                                                          |
| p38a_C119V_Rev                | GGTCATCTGTAAGCTTCTGAACTTTCACAATGTTGTTTCAG                                                                                                                                                                                         |
|                               |                                                                                                                                                                                                                                   |
| <b>For Nanobit constructs</b> | Promega NanoBiT® MCS Starter System (N2014);<br>Cloned into the following plasmids:<br>pBiT1.1-N[TK/LgBiT] for p38a and JNK<br>pBiT1.1-C[TK/LgBiT] for ERK2<br>pBiT2.1-N[TK/SmBiT] for partners (MKK1, MKK6, MKK7, RSK1 and MKP3) |
| ERK2_LC_NheI_Forw             | TAT ATA GCT AGC CAC CAT GGC GGC GGC GGC G                                                                                                                                                                                         |
| ERK2_LC_Xho_R_Forw            | TTA ATT CTC GAG CCA GAT CTG TAT CCT GGC TGG AAT C                                                                                                                                                                                 |
| JNK1_LN_XhoI_Forw             | TTA ATT CTC GAG CGG TAT GAG CAG AAG CAA GCG TGA C                                                                                                                                                                                 |
| JNK1_LN_NheI_Rev              | TAT ATA GCT AGC TCA CTG CTG CAC CTG TGC TAA AG                                                                                                                                                                                    |
| p38a_LN_XhoI_Forw             | TTATCTCTCGAGCGGTA TGTCTCAGGA GAGGCCACG                                                                                                                                                                                            |
| p38a_LN_NheI_Rev              | AGATAAGCTAGCTCAGGACTCCATCTCTTCTTGGTC                                                                                                                                                                                              |
| MKK1_SN_XhoI_Forw             | TTATCTCTCGAGCATGCCCAAGAAGAAGCCGACG                                                                                                                                                                                                |
| MKK1_noStop_SN_NheI_Rev       | AGATAAGCTAGCGACGCCAGCAGCATGGGTTG                                                                                                                                                                                                  |
| MKK6_SN_XhoI_Forw             | TTATCTCTCGAGCATGTCTCAGTCGAAAGGCAAG                                                                                                                                                                                                |
| MKK6_noStop_SN_NheI_Rev       | AGATAAGCTAGCGTCTCCAAGAATCAGTTTTACAAAAGATGC                                                                                                                                                                                        |
| MKK7_SN_XhoI_Forw             | TTATCTCTCGAGCATGGCGGCGTCTCCCTGG                                                                                                                                                                                                   |
| MKK7_nostop_SN_NheI_Rev       | AGATAAGCTAGCCCTGAAGAAGGGCAGGTGGG                                                                                                                                                                                                  |
| RSK1_SN_XhoI_Forw             | TTATCTCTCGAGCATGCCGCTCGCCAGCTCAAGG                                                                                                                                                                                                |
| RSK1_SN_NheI_Rev              | AGATAAGCTAGCTCACAGGGTGGTGGATGGCAACTTC                                                                                                                                                                                             |
| MKP3_SN_XhoI_Forw             | TTATCTCTCGAGCATGATAGATACGCTCAGACCCGTGC                                                                                                                                                                                            |
| MKP3_noStop_SN_NheI_Rev       | AGATAAGCTAGCCGTAGATTGCAGAGAGTCCACCTG                                                                                                                                                                                              |

## SUPPLEMENTARY NOTE 1 (on the adduct formation NMR experiments)

The adduct formation NMR experiments were conducted on Varian NMR System spectrometers with inverse detection probes, operating at 400 MHz and 600 MHz.  $^1\text{H}$  and  $^{13}\text{C}$  assignment assignments were established using a combination of two-dimensional  $^1\text{H}$ - $^1\text{H}$  COSY,  $^1\text{H}$ - $^1\text{H}$  TOCSY,  $^1\text{H}$ - $^1\text{H}$  ROESY,  $^1\text{H}$ - $^{13}\text{C}$  HSQC and  $^1\text{H}$ - $^{13}\text{C}$  HMBC measurements.

### Titration of **3R** with **BME**:

2.28 mg (8.5 mmol) **3R** was dissolved in 3:1 mixture of DMSO- $d_6$ -PBS ( $\text{D}_2\text{O}$ ) buffer (575  $\mu\text{L}$ ). The mixture was transferred to an NMR tube. After the initial  $^1\text{H}$  NMR measurement, **BME** (0.84 mmol, 0.1 equiv., 12  $\mu\text{L}$  of 70.4 mM in DMSO- $d_6$ -PBS ( $\text{D}_2\text{O}$ ) buffer) was added to the sample and  $^1\text{H}$  NMR spectra was acquired after 5 minutes of equilibration time. This step was repeated until the sample contained 1.4 equiv. of **BME**.

### Summary of NMR data for diastereomeric adducts of **3R** and **BME**:

The (*S,S*)-diastereomeric adduct of **3R** and **BME** (seen in green in **Supplementary Fig. 23**):

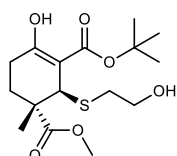

$^1\text{H}$  NMR (400 MHz, DMSO- $d_6$ -PBS):  $\delta$  3.87 (d,  $J = 2.1$  Hz, 1H), 3.52 (s, 3H), 3.55 – 3.48 (m, 2H), 2.70 – 2.66 (m, 2H), 2.21 – 2.09 (m, 2H), 1.89 – 1.81 (m, 1H), 1.79 – 1.74 (m, 1H), 1.43 (s, 9H), 1.22 (s, 3H).

$^{13}\text{C}$  NMR (101 MHz, DMSO- $d_6$ -PBS):  $\delta$  176.3, 171.1, 170.62, 102.8, 83.0, 60.98, 52.6, 48.1, 47.2, 37.6, 28.18, 26.3, 25.9, 24.9;

The (*S,R*)-diastereomeric adduct of **3R** and **BME** (seen in blue in **Supplementary Fig. 23**):

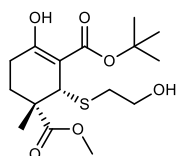

$^1\text{H}$  NMR (400 MHz, DMSO- $d_6$ -PBS):  $\delta$  3.60 (d,  $J = 2.0$  Hz, 1H), 3.59 (s, 3H), 3.41 – 3.37 (m, 2H), 2.65 – 2.56 (m, 2H), 2.27 – 2.20 (m, 2H), 2.01 – 1.90 (m, 1H), 1.72 – 1.64 (m, 1H), 1.43 (s, 9H), 1.06 (s, 3H).

$^{13}\text{C}$  NMR (101 MHz, DMSO- $d_6$ -PBS):  $\delta$  176.0, 171.4, 170.57, 100.4, 82.7, 60.98, 52.2, 48.4, 46.8, 36.8, 28.18, 25.2, 24.0, 21.3;



### Jump dilution measurement of **3R** with **BME**:

13.36 mg (49.8  $\mu\text{mol}$ ) **3R** was dissolved in 3:1 mixture of DMSO- $d_6$ -PBS ( $D_2O$ ) buffer (546  $\mu\text{L}$ ). A solution of **BME** (27  $\mu\text{L}$ , 3.5 M in DMSO- $d_6$ -PBS ( $D_2O$ ) buffer, 1.2 equiv.) and an internal standard solution (37  $\mu\text{L}$ , 394.2 mM, 1,3,5-trimethoxybenzene in DMSO- $d_6$ -PBS ( $D_2O$ ) buffer) were added to the substrate, and the mixture was transferred to an NMR tube. The sample was allowed to equilibrate for one hour while monitoring the isomerization of the formed diastereomers. The final diastereomer ratio of 1:1 was reached after 30 minutes. 60  $\mu\text{L}$  of the sample was diluted to 600  $\mu\text{L}$  with DMSO- $d_6$ -PBS ( $D_2O$ ) buffer, and the first measurement point was taken after 145 seconds, followed by scans every 35 seconds.

### Titration of **6R,R** with **BME**:

2.59 mg (8.8  $\mu\text{mol}$ ) **6R,R** was dissolved in 3:1 mixture of DMSO- $d_6$ -PBS ( $D_2O$ ) buffer (573  $\mu\text{L}$ ). A solution of internal standard (27  $\mu\text{L}$ , 354.1 mM, 1,3,5-trimethoxybenzene in DMSO- $d_6$ -PBS ( $D_2O$ ) buffer) was added to the sample and the mixture was transferred to an NMR tube. After the initial  $^1\text{H}$  NMR measurement, **BME** (0.84 mmol, 0.1 equiv., 12  $\mu\text{L}$  of 70.4 mM in DMSO- $d_6$ -PBS ( $D_2O$ ) buffer) was added to the sample and  $^1\text{H}$  NMR spectra was acquired after 5 minutes of equilibration time. This step was repeated until the sample contained 2.4 equiv. of **BME**.

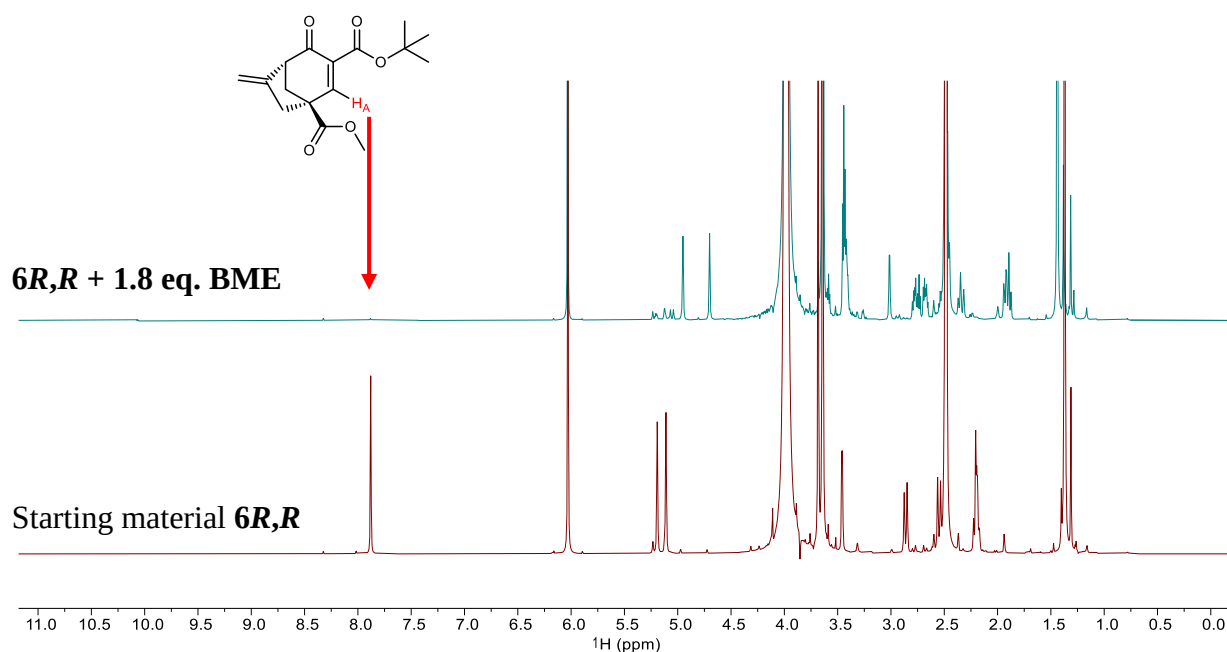

**Supplementary Fig. 24.** The  $^1\text{H}$  NMR (600 MHz) spectra of **6R,R** before (lower spectrum) and after (upper spectrum) the addition of 1.8 eq. **BME** in DMSO- $d_6$ -PBS ( $D_2O$ ) buffer. The disappearance of the  $H_A$  alkene hydrogen and the emergence of a new signal set indicating the Michael adduct formation

Summary of NMR data for diastereomeric adducts of **6R,R** and **BME**:

The (*S,S,R*)-diastereomeric adduct of **6R,R** and **BME** (seen in green in **Supplementary Fig. 25.**):

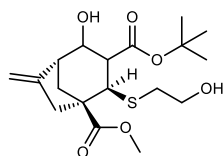

$^1\text{H}$  NMR (600 MHz, DMSO- $d_6$ -PBS)  $\delta$  4.96 (s, 1H), 4.71 (s, 1H), 3.66 – 3.65 (m, 1H), 3.64 (s, 3H), 3.44 – 3.42 (m, 2H), 3.02 (d,  $J$  = 3.9 Hz, 1H), 2.79 (dd,  $J$  = 12.4, 6.5 Hz, 1H), 2.72 – 2.65 (m, 1H), 2.48 – 2.44 (m, 1H), 2.33 (d,  $J$  = 17.9 Hz, 1H), 1.94 – 1.93 (m, 1H), 1.89 (d,  $J$  = 12.1 Hz, 1H), 1.44 (s, 9H).

$^{13}\text{C}$  NMR (151 MHz, dmsO)  $\delta$  174.80, 172.87, 171.95, 149.43, 107.97, 98.13, 83.49, 61.33, 55.01, 53.01, 51.46, 49.05, 39.90, 37.99, 33.15, 28.73.

The (*S,R,R*)-diastereomeric adduct of **6R,R** and **BME** (seen in blue in **Supplementary Fig. 25.**):

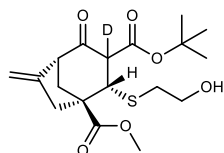

$^1\text{H}$  NMR (600 MHz, DMSO- $d_6$ -PBS)  $\delta$  5.07 (s, 1H), 5.05 (s, 1H), 3.66 (s, 3H), 3.62 – 3.61 (m, 1H), 3.42 – 3.37 (m, 2H), 3.27 (d,  $J$  = 5.4 Hz, 1H), 2.95 (d,  $J$  = 18.3 Hz, 1H), 2.72 – 2.65 (m, 1H), 2.55 (t,  $J$  = 7.2 Hz, 2H), 2.25 (dd,  $J$  = 12.8, 5.5 Hz, 1H), 1.95 – 1.94 (m, 1H), 1.39 (s, 9H).

$^{13}\text{C}$  NMR (151 MHz, DMSO- $d_6$ -PBS)  $\delta$  202.01, 173.81, 168.66, 145.66, 112.14, 83.32, 61.24, 60.78, 57.88, 55.90, 53.30, 52.84, 40.91, 35.93, 35.25, 28.44.

The deuterated  $\alpha$ -carbon is only discernible in the  $^1\text{H}$ - $^{13}\text{C}$  HMBC measurement.



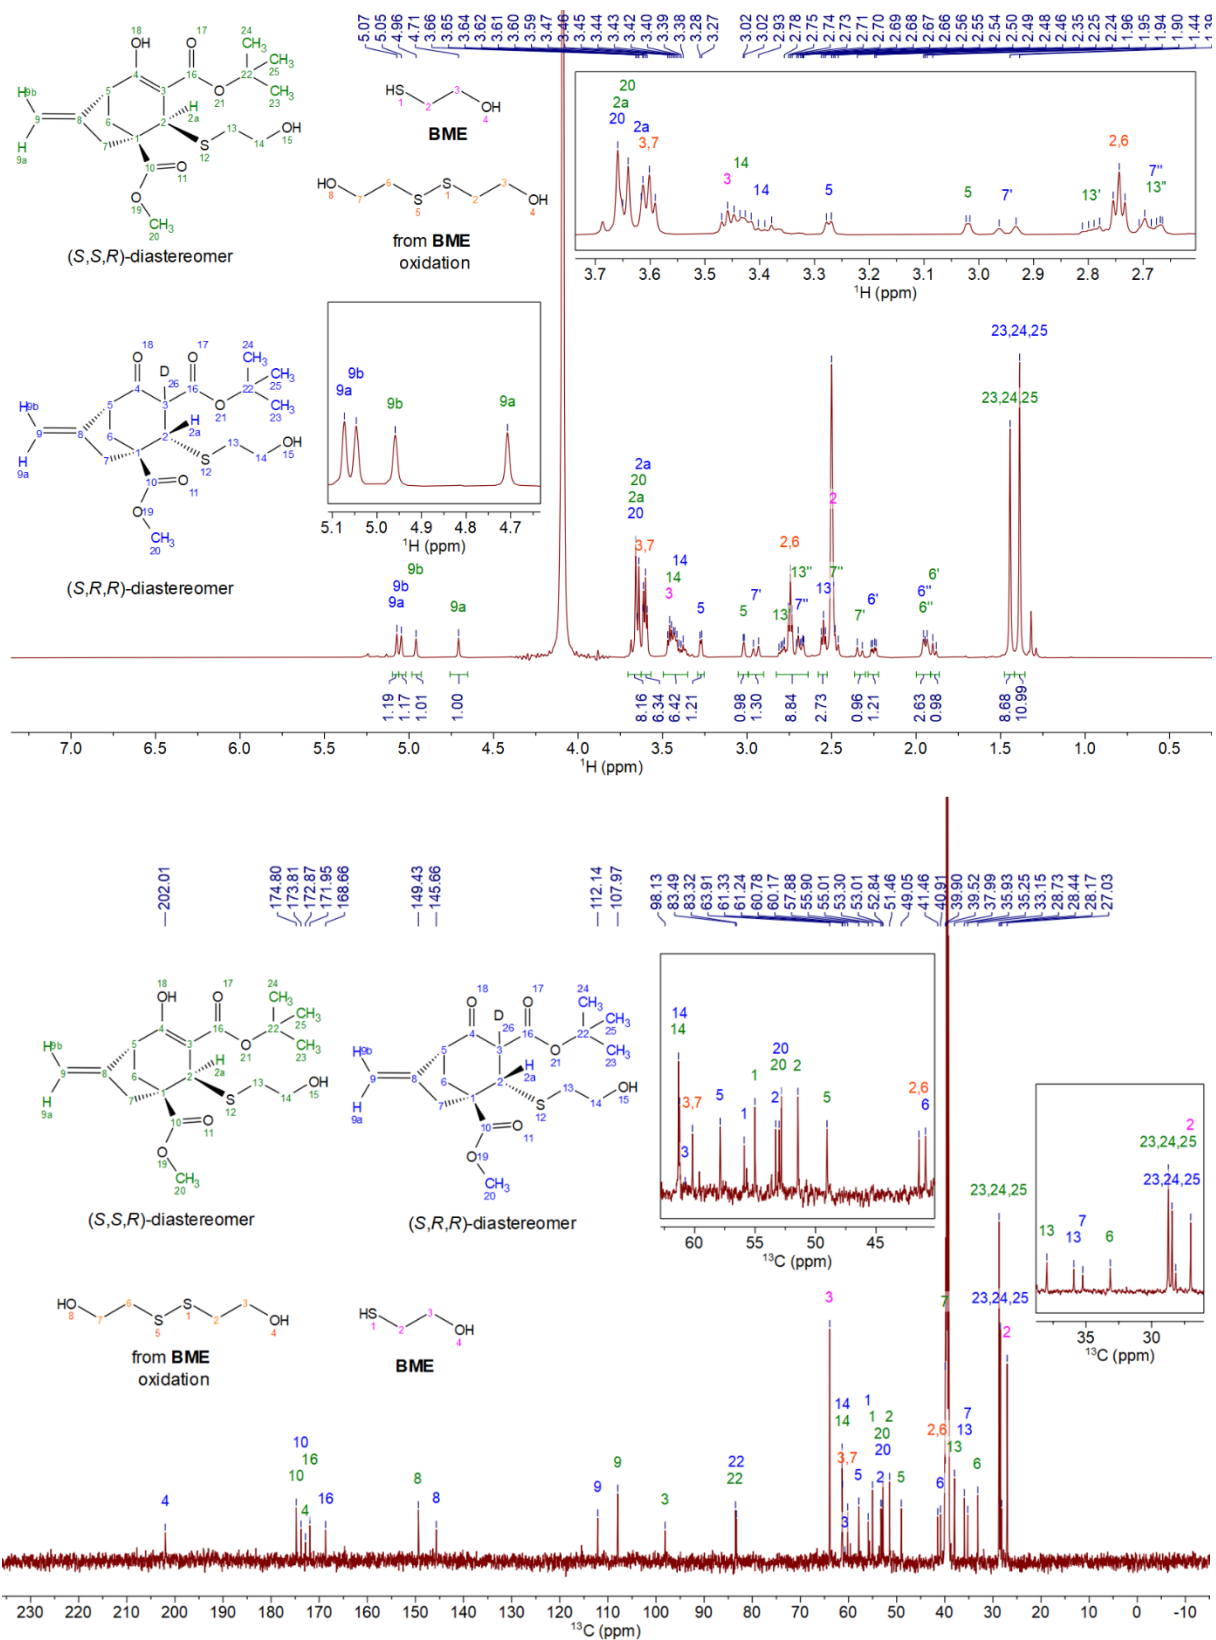

**Supplementary Fig. 25.** The <sup>1</sup>H-NMR (600 MHz) and <sup>13</sup>C-NMR (151 MHz) spectra and assignment of the isomeric **BME** adducts of **6R,R** in DMSO-d<sub>6</sub>-PBS (D<sub>2</sub>O) buffer

#### Titration of **6R,R** with **His-Test**:

2.65 mg (9.1 mmol) **6R,R** was dissolved in 3:1 mixture of DMSO- $d_6$ -PBS ( $D_2O$ ) buffer (578  $\mu$ L). A solution of internal standard (22  $\mu$ L, 154.9 mM, 1,3,5-trimethoxybenzene in DMSO- $d_6$ -PBS ( $D_2O$ ) buffer) was added to the sample and the mixture was transferred to an NMR tube. After the initial  $^1H$  NMR measurement, **His-Test** (1.1 mmol, 0.1 equiv., 10  $\mu$ l of 109.3 mM in DMSO- $d_6$ -PBS ( $D_2O$ ) buffer) was added to the sample and  $^1H$  NMR spectra was acquired after 5 minutes of equilibration time. This step was repeated until the sample contained 2.6 equiv. of **His-Test**.

The *N*-acetyl-L-histidine methyl ester (**His-Test**) was added at different concentrations into the solution of the compound **6R,R** during the NMR titration experiment. The concentrations of the reactants (compound **6R,R** and *N*-acetyl-L-histidine methyl ester) and the adduct were determined relative to the internal standard. The  $K_{chem\_off}$  was determined for the various concentrations of *N*-acetyl-L-histidine methyl ester (using the following equation:  $K_{chem\_off} = [reactant1] \times [reactant2] / [product]$ ). The average and standard deviation of the  $K_{chem}$  values, determined in the presence of histidine derivatives greater than 5 mM, have been calculated, assuming that equilibrium is established at those concentrations.

## Supplementary Note 2 (on the ECD measurements)

The ECD spectrum of **3R** had an intense positive Cotton effect (CE) at 236 nm and a negative one at 209 nm, which were governed by the (*R*) absolute configuration of its quaternary chirality center. Upon addition of the 2-sulfanylethanol (BME) reagent, both of these two ECD transitions began diminishing and a new positive weaker CE appeared at 225 nm (**Supplementary Fig. 26a**). The change of the 236 nm positive CE was monitored in the function of the equivalent of 2-sulfanylethanol, which produced a smoothly decreasing curve. The curve fitting of the titration points gave the equilibrium constant with the value of  $643\pm 41$  ( $M^{-1}$ ) (**Supplementary Fig. 26b**).

The substrate **6R,R** had two chirality centers and a bridged skeleton, which were expected to induce remarkable diastereoselectivity during the conjugate addition. **6R,R** had an intense positive CEs at 341 nm and a negative one at 233 nm, the magnitude of which was decreasing continuously with the increasing amount of the reagent (**Supplementary Fig. 26c**). Simultaneously, a new negative ECD band at 265 nm and a positive one at 295 nm appeared, which could be attributed to the addition product. With an excess of the 2-sulfanylethanol reagent, the initial 341 nm CE of **6R,R** was converted to the baseline and monitoring the change of  $\Delta\epsilon$  at 341 nm allowed determining the equilibrium constant as  $409\pm 68$  ( $M^{-1}$ ) (**Supplementary Fig. 26d**).

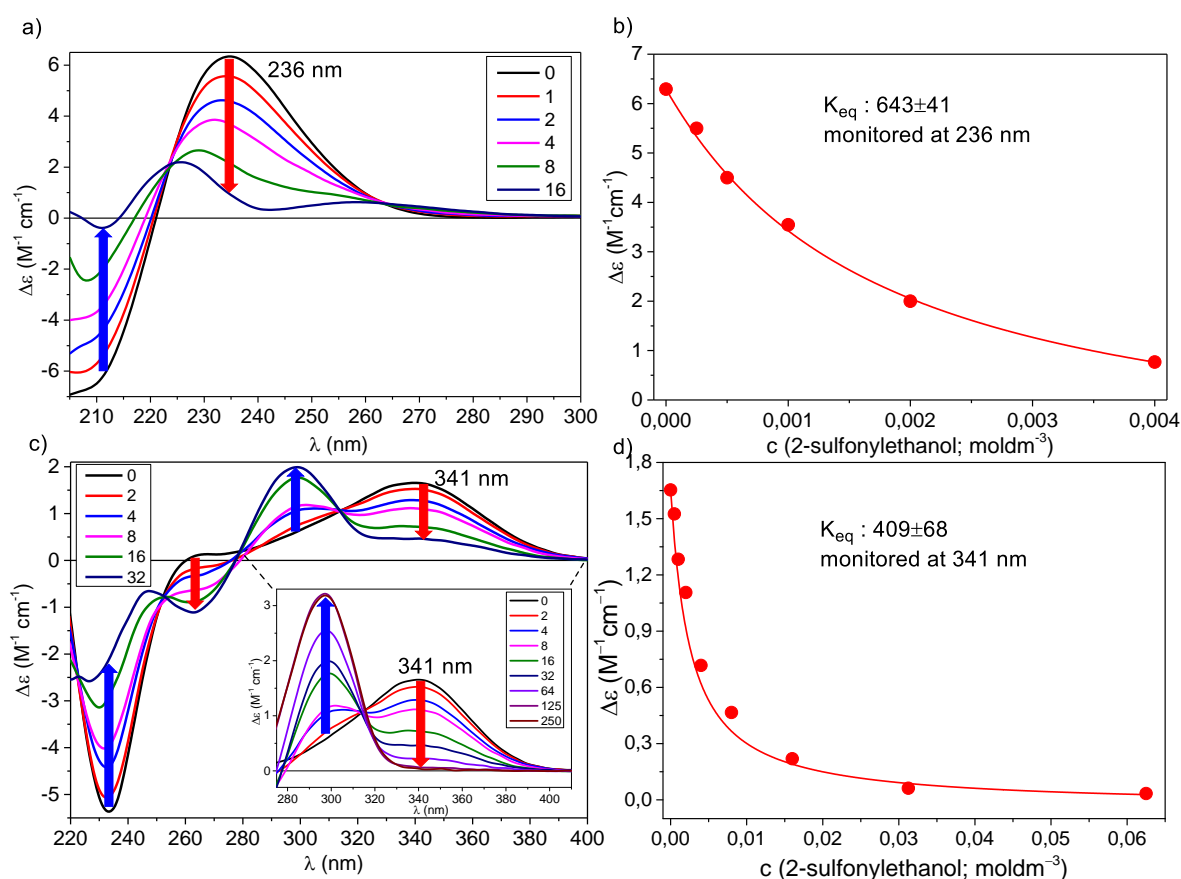

**Supplementary Fig. 26.** a) ECD spectrum of **3R** (black) in phosphate buffer saline compared (PBS) with those produced by addition of different equivalents of 2-sulfanylethanol (from 1 to 16 equivalents). b) Change of the ECD signal ( $\Delta\epsilon$ ) of **3R** in the function of the increasing concentration of 2-sulfanylethanol monitored at 236 nm. Curve fitting produced the value of  $643\pm 41$  ( $M^{-1}$ ) for the equilibrium constant. c) ECD spectrum of **6R,R** (black) in PBS compared with those produced by addition of different equivalents of 2-sulfanylethanol (from 2 to 32

equivalents). Inset figure shows the enlarged 275-410 nm wavelength range with 0-250 equivalents of 2-sulfonylethanol. d) Change of the ECD signal of **6R,R** ( $\Delta\epsilon$ ) in the function of the increasing concentration of 2-sulfanylethanol monitored at 341 nm. Curve fitting produced the value of  $409\pm 68$  ( $M^{-1}$ ) for the equilibrium constant.

Experimental data

**3R**: ECD [nm ( $\Delta\epsilon$ ), PBS] (67  $\mu\text{g}/1$  ml): 329 (0.14), 236 (6.34), 209 (-6.57).

**6R,R**: ECD [nm ( $\Delta\epsilon$ ), PBS] (73  $\mu\text{g}/1$  ml): 341 (1.66), 233 (-5.37), 209 (2.07).

**19'S**: ECD [nm ( $\Delta\epsilon$ ), PBS] (89.5  $\mu\text{g}/1$  ml): 236 (3.78), 212sh (-4.11), 206 (-4.57).

**18R**: ECD [nm ( $\Delta\epsilon$ ), PBS] (67  $\mu\text{g}/1$  ml): 331 (0.20), 236 (5.74), 208 (-6.36).

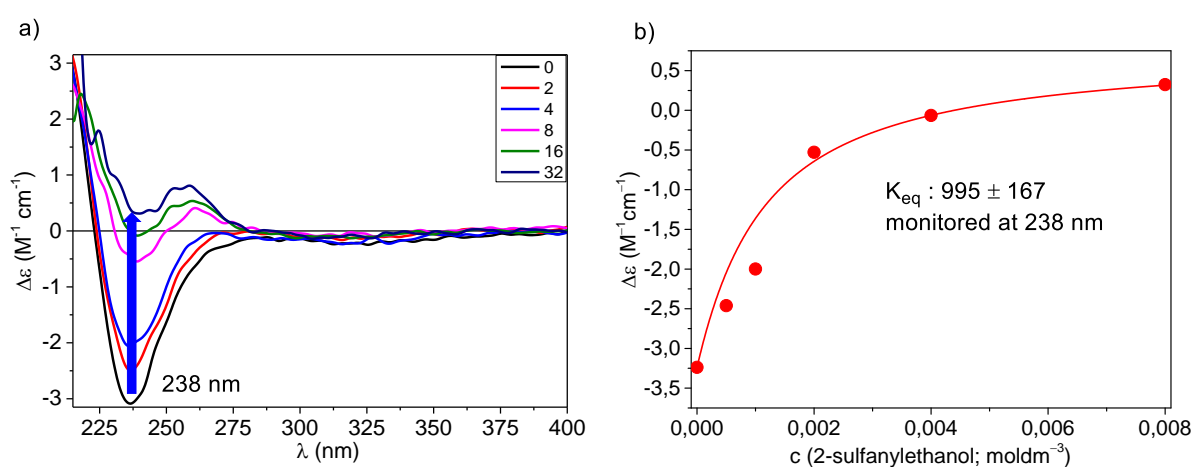

**Supplementary Fig. 27.** a) ECD spectrum of **19'S** (black) in phosphate buffer saline compared (PBS) with those produced by addition of different equivalents of 2-sulfonylethanol (from 2 to 32 equivalents). b) Change of the ECD signal ( $\Delta\epsilon$ ) of **19'S** in the function of the increasing concentration of 2-sulfanylethanol monitored at 238 nm. Curve fitting produced the value of  $995\pm 167$  ( $M^{-1}$ ) for the equilibrium constant.

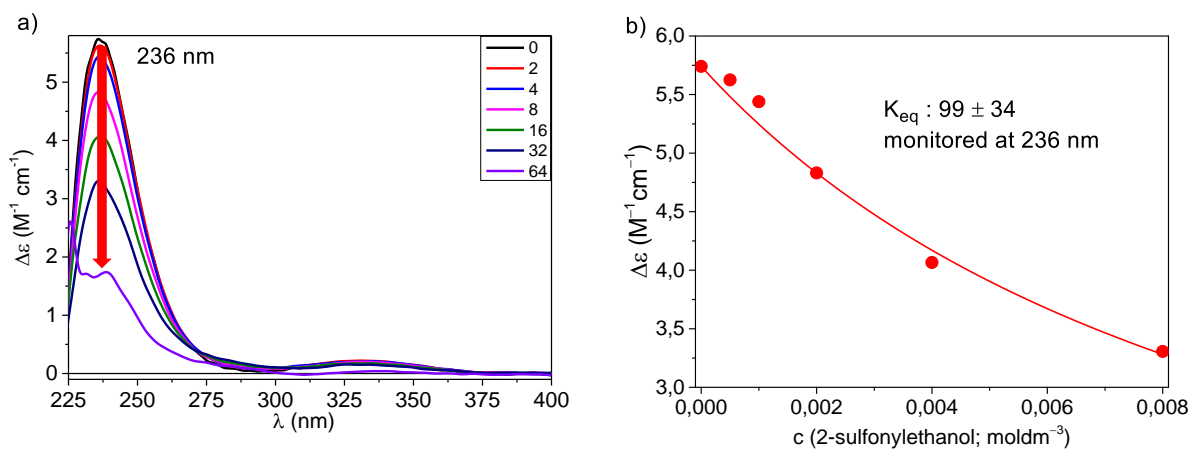

**Supplementary Fig. 28.** a) ECD spectrum of **18R** (black) in phosphate buffer saline compared (PBS) with those produced by addition of different equivalents of 2-sulfonylethanol (from 2 to 32 equivalents). b) Change of the ECD signal ( $\Delta\epsilon$ ) of **18R** in the function of the increasing concentration of 2-sulfonylethanol monitored at 238 nm. Curve fitting produced the value of  $99 \pm 34$  ( $M^{-1}$ ) for the equilibrium constant.

## SUPPLEMENTARY NOTE 3 (on the synthesis of the compounds)

### General procedure A for synthesizing cyclohexenone warhead compounds:

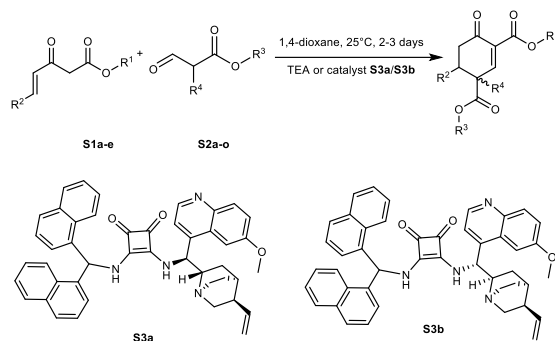

Compound **S1a-e** (1.0 eq.), compound **S2a-o** (1.1 eq.) and the catalyst (triethylamine (0.10 eq.) for racemic mixtures or catalyst **S3a** or **S3b** (0.02 eq.) for the enantiomerically enriched compounds respectively) was dissolved in 1,4-dioxane (1.0 M) and the reaction mixture was stirred at room temperature for 2-3 days. When the reaction was completed removal of the volatile compounds under reduced pressure was followed by purification by flash chromatography on silica gel (hexanes 0-25% ethyl acetate) giving the products as a yellow oil.

Compounds **S1a-e**, **S2a-j**, **S3a**, **S3b** were synthesized according to the literature procedures.<sup>1,2</sup>

Compound **1** was synthesized according to the literature procedure.<sup>2</sup>

Compounds **4**, **11** were synthesized according to the literature procedure.<sup>1</sup>

Compound **39** was purchased from Sigma.

#### *N*-(2-(2-(2-(2-azidoethoxy)ethoxy)ethoxy)ethyl)-5-((3*S*,4*S*,6*R*)-2-oxohexahydro-1*H*-thieno[3,4-*d*]imidazol-4-yl)pentanamide (**S4**):

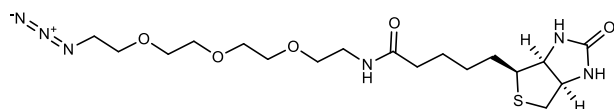

Compound **S4** was purchased from TCI.

**Preparation of 1-(*tert*-butyl) 3-(4-(1-(13-oxo-17-((3*a*S,4*S*,6*a*R)-2-oxohexahydro-1*H*-thieno[3,4-*d*]imidazol-4-yl)-3,6,9-trioxa-12-azaheptadecyl)-1*H*-1,2,3-triazol-4-yl)butyl) (S)-3-methyl-6-oxocyclohex-1-ene-1,3-dicarboxylate (2-biotin):**

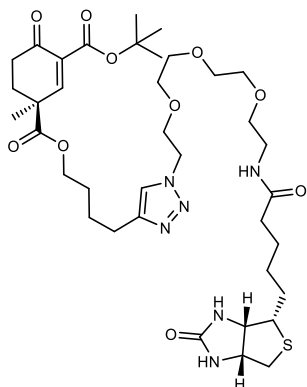

To the solution of **31S** (18.0 mg, 0.040 mmol, 1 eq.) in methylene chloride (162  $\mu$ L) was added compound **S4** (20.3 mg, 0.061 mmol, 1.5 eq.). To this mixture was added the solution of copper(II) sulfate pentahydrate (5.1 mg, 0.020 mmol, 0.5 eq.) and sodium ascorbate (0.8 mg, 0.004 mmol, 0.1 eq.) in water (162  $\mu$ L) and methanol (81  $\mu$ L). The reaction mixture was vigorously stirred at 25°C. After 3 hours the mixture was diluted with methylene chloride and water then the aqueous phase was washed with methylene chloride two times. The combined organic phases were washed with brine then dried over anhydrous Na<sub>2</sub>SO<sub>4</sub>, filtered, and evaporated under reduced pressure. The crude product was purified by preparative RP-HPLC using a gradient method on a Gemini® 5 $\mu$ m C18 110 Å column (H<sub>2</sub>O:MeCN = 95:5 (0.1 % HCOOH) to 100% MeCN (0.1 % HCOOH)). Compound **2-biotin** was obtained as a colorless oil (11.2 mg, 36%).

**HRMS** (ESI-TTOF)  $m/z$  [M+H]<sup>+</sup> calculated for C<sub>37</sub>H<sub>59</sub>N<sub>6</sub>O<sub>10</sub>S 779.4007 found 779.3990

**<sup>1</sup>H NMR** (600 MHz, CDCl<sub>3</sub>):  $\delta$  7.49 (s, 1H), 7.34 (s, 1H), 6.76 (s, 1H), 4.52 (t,  $J$  = 5.2 Hz, 2H), 4.49 (dd,  $J$  = 7.8, 4.9 Hz, 1H), 4.31 (dd,  $J$  = 7.8, 4.6 Hz, 1H), 4.21 – 4.14 (m, 2H), 3.88 (t,  $J$  = 5.2 Hz, 2H), 3.60 – 3.60 (m, 2H), 3.60 – 3.59 (m, 2H), 3.59 – 3.57 (m, 4H), 3.54 (t,  $J$  = 5.1 Hz, 2H), 3.44 – 3.38 (m, 2H), 3.13 (td,  $J$  = 7.3, 4.4 Hz, 1H), 2.89 (dd,  $J$  = 12.8, 4.9 Hz, 1H), 2.74 – 2.73 (m, 2H), 2.73 – 2.72 (m, 1H), 2.56 – 2.45 (m, 2H), 2.43 (dt,  $J$  = 12.8, 6.2 Hz, 1H), 2.21 (t,  $J$  = 7.4 Hz, 2H), 1.97 (ddd,  $J$  = 14.0, 9.1, 5.4 Hz, 1H), 1.73 (s, 2H), 1.73 (s, 2H), 1.73 – 1.72 (m, 1H), 1.67 – 1.66 (m, 2H), 1.64 – 1.63 (m, 1H), 1.50 (s, 9H), 1.47 (s, 3H), 1.45 – 1.37 (m, 2H).

**<sup>13</sup>C NMR** (151 MHz, CDCl<sub>3</sub>):  $\delta$  193.7, 173.4, 173.3, 163.8, 163.7, 154.2, 147.2, 133.2, 122.1, 82.2, 70.5, 70.39, 70.35, 70.0, 69.9, 69.5, 65.4, 61.8, 60.2, 55.5, 50.2, 44.2, 40.5, 39.1, 35.8, 35.3, 31.9, 28.1, 28.04, 28.02, 25.7, 25.6, 25.1, 24.6;

**Preparation of 1-(tert-butyl) 3-methyl 3-methyl-6-oxocyclohex-1-ene-1,3-dicarboxylate (3, 3R/3S):**

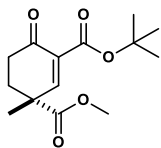

Following the **General Procedure A** using: **S1a** (2.50 g, 14.7 mmol), **S2b** (1.88 g, 16.2 mmol) and TEA (206  $\mu$ L, 1.47 mmol) or **S3a/S3b** (201.0 mg, 0.29 mmol) in 1,4-dioxane (15 mL, 1.0 M) at room temperature for 2 days. After removal of the volatile compounds under reduced pressure, purification by flash chromatography on silica gel (hexanes 0-25% ethyl acetate) gave the product as a yellow oil (2.25 g, 57% for **3**, 2.81 g, 71% for **3R**, 2.78 g, 71% for **3S**).

*ee*: 99% with catalyst **S3a** (**3R**)

*ee*: -89% with catalyst **S3b** (**3S**)

**HRMS** (ESI-TTOF)  $m/z$   $[M+H]^+$  calculated for  $C_{14}H_{21}O_5$  269.1379 found 269.1383

**$^1H$  NMR** (500 MHz,  $CDCl_3$ ):  $\delta$  7,31 (s, 1H); 3,73 (s, 3H); 2,53-2,45 (m, 2H); 2,44–2,37 (m, 1H); 2,00–1,90 (m, 1H); 1,48 (s, 9H); 1,45 (s, 3H).

**$^{13}C$  NMR** (125 MHz,  $CDCl_3$ ):  $\delta$  193,6; 173,9; 163,7; 153,9; 133,3; 82,2; 52,9; 44,2; 35,4; 32,1; 28,1; 24,7;

**Preparation of 1-(tert-butyl) 3-methyl (3R,4S)-3,4-dimethyl-6-oxocyclohex-1-ene-1,3-dicarboxylate (3'R):**

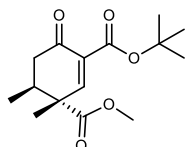

Following the **General Procedure A** using: **S1b** (184 mg, 1.0 mmol), **S2b** (174 mg, 1.5 mmol), and **S3a** (27,4 mg, 0.04 mmol) in 1,4-dioxane: hexanes 9:1 (1.0 mL, 1.0 M) at room temperature for 6 days. After removal of the volatile compounds under reduced pressure, purification by flash chromatography on silica gel (hexanes 0-25% ethyl acetate) gave the product as a yellow oil (52 mg, 18%).

*dr*: >20:1

*ee*: 89% with catalyst **S3a**

**HRMS** (ESI-TTOF)  $m/z$   $[M+H]^+$  calculated for  $C_{15}H_{23}O_5$  283.1545 found 283.1551

**$^1H$  NMR** (500 MHz,  $CDCl_3$ ):  $\delta$  7.27 (s, 1H), 3.75 (s, 3H), 2.70 (dq,  $J = 11.3, 6.9, 4.4$  Hz, 1H), 2.47 (dd,  $J = 16.8, 4.4$  Hz, 1H), 2.30 (dd,  $J = 16.8, 11.7$  Hz, 1H), 1.50 (s, 9H), 1.33 (s, 3H), 0.99 (d,  $J = 6.9$  Hz, 3H).

**$^{13}C$  NMR** (125 MHz,  $CDCl_3$ ):  $\delta$  193.6, 174.2, 163.6, 154.8, 132.7, 82.3, 52.9, 48.5, 42.8, 34.7, 28.2, 16.7, 16.2;



**Preparation of 3-(*tert*-butyl) 1-methyl 4-oxo-5,6-dihydro-[1,1'-biphenyl]-1,3(4*H*)-dicarboxylate (5):**

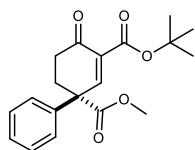

Following the **General Procedure A** using: **S1a** (85 mg, 0.5 mmol), **S2d** (98 mg, 0.55 mmol), and TEA (14  $\mu$ L, 0.1 mmol) in 1,4-dioxane (0.5 mL, 1.0 M) at room temperature for 2 days. After removal of the volatile compounds under reduced pressure, purification by flash chromatography on silica gel (hexanes 0-25% ethyl acetate) gave the product as a yellow oil (62 mg, 38%).

**HRMS** (ESI-TTOF)  $m/z$   $[M+H]^+$  calculated for  $C_{19}H_{23}O_5$  331.1540 found 331.1544

**$^1H$  NMR** (500 MHz,  $CDCl_3$ ):  $\delta$  7.70 (s, 1H), 7.37 – 7.34 (m, 2H), 7.31 – 7.29 (m, 1H), 7.26 – 7.24 (m, 2H), 3.74 (s, 3H), 2.75 – 2.69 (m, 1H), 2.56 – 2.50 (m, 1H), 2.39 – 2.29 (m, 2H), 1.53 (s, 9H).

**$^{13}C$  NMR** (125 MHz,  $CDCl_3$ ):  $\delta$  193.5, 172.0, 163.8, 152.0, 139.9, 135.2, 129.2, 128.1, 126.3, 82.5, 53.2, 52.7, 35.4, 33.4, 28.2;

**Preparation of 3-(*tert*-butyl) 1-methyl 6-methylene-4-oxobicyclo[3.2.1]oct-2-ene-1,3-dicarboxylate (6, 6*S,S*/6*R,R*):**

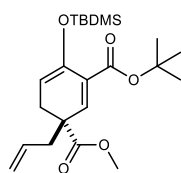

A flame-dried vial was charged with an anhydrous toluene solution (3.5 mL) of **13/13R/13S** (1.00 g, 3.40 mmol, 1 eq.) and TEA (940  $\mu$ L, 6.79 mmol, 2 eq.) under a nitrogen atmosphere. The reaction mixture was cooled to 0°C then TBDMSOTf (936  $\mu$ L, 4.08 mmol, 1.2 eq.) was added dropwise, and it was stirred at 0°C for 2 hours. When the reaction was completed, the mixture was diluted with water and extracted with *n*-Hexane three times. The combined organic phases were washed two times with saturated  $NaHCO_3$  solution and once with brine, dried over anhydrous  $Na_2SO_4$ , filtered and the solvent was removed under reduced pressure. The silyl-enol ether intermediate was obtained as a colorless oil (1.307 g, 94%) and was used without further purification in the next step.

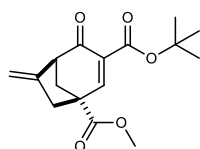

To an anhydrous dimethyl sulfoxide (18 mL) solution of the intermediate were added 4Å molecular sieves, and  $Pd(OAc)_2$  (71.8mg, 320.0 mg, 0.1 eq.), and the atmosphere was charged with 3 bars of  $O_2$ . The reaction mixture was stirred at 60°C for 18 hours. After completion, the reaction mixture was cooled to 25°C and 50 mL of diethyl-ether was added and it was stirred for a further 1 hour. The reaction mixture was filtered through a pad of Celite then it was

washed with water twice. The aqueous phase was extracted with 30 mL of diethyl-ether three times, then the combined organics were washed three times with brine. The organic phase was dried over anhydrous Na<sub>2</sub>SO<sub>4</sub>, filtered and the solvent was removed under reduced pressure. Purification by flash chromatography on silica gel (hexanes, 0-25% ethyl acetate) to give the product as white solid (268.5 mg, 57% for **6**, 214,8 mg, 46% for **6S,S**, 179.0 mg, 38% for **6R,R**).

*ee*: 99+% with catalyst **S3a** (**6S,S**)

*ee*: -99+% with catalyst **S3b** (**6R,R**)

**HRMS** (ESI-TTOF) *m/z* [M+H]<sup>+</sup> calculated for C<sub>16</sub>H<sub>21</sub>O<sub>5</sub> 293.1383 found 293.1377

**<sup>1</sup>H NMR** (500 MHz, CDCl<sub>3</sub>): δ 8.02 (d, *J* = 1.9 Hz, 1H), 5.36 (s, 1H), 5.13 (s, 1H), 3.81 (s, 3H), 3.59 (d, *J* = 4.6, 1H), 2.96 (dt, *J* = 15.9, 2.7 Hz, 1H), 2.64 (d, *J* = 18.1 Hz, 1H), 2.37 – 2.29 (m, 2H), 1.50 (s, 9H).

**<sup>13</sup>C NMR** (125 MHz, CDCl<sub>3</sub>): δ 192.0, 163.0, 155.7, 142.0, 131.0, 114.0, 82.2, 58.5, 52.9, 51.8, 42.2, 41.1, 28.2;

#### Preparation of *tert*-butyl 3,3-dimethyl-6-oxocyclohex-1-ene-1-carboxylate (**7**):

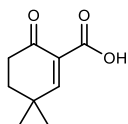

Compound **S5** was prepared according to the literature procedures.<sup>3,4</sup>

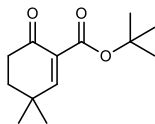

Compound **S5** (100.0 mg, 0.595 mmol, 1 eq.) was dissolved in anhydrous dimethylformamide (5.5 mL) in a flame-dried vial under a nitrogen atmosphere, HBTU (225.5 mg, 0.595 mmol, 1.5 eq.) and *N*-methylmorpholine (131 μL, 0.825 mmol, 2.0 eq.) were added and the mixture was stirred at 25°C. After 30 minutes *tert*-butyl alcohol (114 μL, 0.275 mmol, 2 eq.) was added and the reaction mixture was stirred at 25°C for 3 days. The reaction was monitored by HPLC-MS and when the starting material was consumed the reaction mixture was diluted with ethyl acetate, washed two times with a 5% citric acid solution, two times with a saturated aqueous Na<sub>2</sub>CO<sub>3</sub> solution, and two times with brine. The organic phase was dried over anhydrous Na<sub>2</sub>SO<sub>4</sub>, filtered, then evaporated under reduced pressure. The resulting crude product was purified by preparative RP-HPLC using a gradient method on a Gemini<sup>®</sup> 5μm C18 110 Å column (H<sub>2</sub>O:MeCN = 95:5 (0.1 % HCOOH) to 100% MeCN (0.1 % HCOOH)). Compound **7** was obtained as a yellow solid (19.4 mg, 14.5%).

**HRMS** (ESI-TTOF) *m/z* [M+H]<sup>+</sup> calculated for C<sub>13</sub>H<sub>20</sub>O<sub>3</sub>Na 247.1304 found 247.1297

**<sup>1</sup>H NMR** (500 MHz, CDCl<sub>3</sub>): δ 7.17 (t, *J* = 0.9 Hz, 1H), 2.51 (t, *J* = 6.8 Hz, 2H), 1.88 (dt, *J* = 6.8, 1.0 Hz, 2H), 1.52 (s, 9H), 1.22 (s, 6H).

**<sup>13</sup>C NMR** (125 MHz, CDCl<sub>3</sub>): δ 194.7, 164.3, 162.4, 131.8, 81.8, 35.7, 35.4, 33.4, 28.2, 27.6;

**Preparation of 1-(*tert*-butyl) 3-methyl-3-benzyl-6-oxocyclohex-1-ene-1,3-dicarboxylate (8, 8*R*/8*S*):**

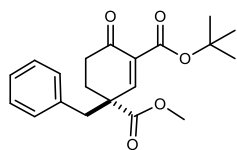

Following the **General Procedure A** using: **S1a** (85 mg, 0.5 mmol), **S2f** (106 mg, 0.55 mmol), and TEA (7  $\mu$ l, 0.05 mmol) or **S3a/S3b** (6.9 mg, 0.01 mmol) in 1,4-dioxane (0.5 mL, 1.0 M) at room temperature for 2 days. After removal of the volatile compounds under reduced pressure, purification by flash chromatography on silica gel (hexanes 0-25% ethyl acetate) gave the product as a yellow oil (110.0 mg, 64% for **8**, 91.0 mg, 56% for **8*R***, 98.7 mg, 61% for **8*S***).

*ee*: -76% with catalyst **S3b (8*R*)**

*ee*: 92% with catalyst **S3a (8*S*)**

**HRMS** (ESI-TTOF)  $m/z$   $[M+H]^+$  calculated for  $C_{20}H_{25}O_5$  345.1696 found 345.1694

**$^1H$  NMR** (500 MHz,  $CDCl_3$ ):  $\delta$  7.42 (s, 1H), 7.26 (m, 3H), 7.10 – 7.05 (m, 2H), 3.68 (s,  $J = 4.8$  Hz, 3H), 3.10 (s, 2H), 2.51 – 2.47 (m, 2H), 2.42 – 2.33 (m, 1H), 2.08 – 2.00 (m, 1H), 1.51 (s,  $J = 4.6$  Hz, 9H).

**$^{13}C$  NMR** (125 MHz,  $CDCl_3$ ):  $\delta$  193.5, 172.5, 163.5, 153.0, 135.0, 133.6, 129.8, 128.5, 127.49, 82.1, 52.5, 49.4, 44.5, 35.3, 30.0, 28.1;

**Preparation of methyl 1-methyl-4-oxocyclohex-2-ene carboxylate (9):**

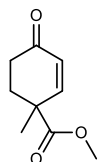

To methyl vinyl ketone (500  $\mu$ L, 6.00 mmol, 1 eq.), dissolved in 6 mL of 1,4-dioxane, was added **S2b** (770.0 mg, 6.60 mmol, 1.1 eq.) and triethylamine (170  $\mu$ L, 1.5 mmol, 0.25 eq.). The reaction mixture was stirred at room temperature and monitored by TLC. Upon completion, *p*-toluenesulfonic acid (630 mg, 3.3 mmol, 0.55 eq.) along with 3 mL of 1,4-dioxane was added, and the reaction was stirred at 100°C until complete conversion of the intermediate product. After removal of the solvent under reduced pressure, the residue was purified by flash column chromatography on silica gel (hexanes 0-25% ethyl acetate) to afford compound **9** as a yellow oil (131 mg, 51%).

**HRMS** (ESI-TTOF)  $m/z$   $[M+H]^+$  calculated for  $C_9H_{13}O_3$  169.0859 found 169.0865

**$^1H$  NMR** (500 MHz,  $CDCl_3$ ):  $\delta$  6.87 (d,  $J = 10.2$  Hz, 1H), 5.98 (d,  $J = 10.2$  Hz, 1H), 3.74 (s, 3H), 2.56 – 2.43 (m, 3H), 2.00 – 1.95 (m, 1H), 1.44 (s, 3H).

**$^{13}C$  NMR** (125 MHz,  $CDCl_3$ ):  $\delta$  198.2, 174.5, 151.5, 128.6, 52.5, 43.8, 34.5, 32.5, 24.8;

### 3-(methoxycarbonyl)-3-methyl-6-oxocyclohex-1-ene-1-carboxylic acid (**10**, **10R/10S**):

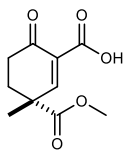

Trifluoroacetic acid (811  $\mu\text{L}$ , 10.53 mmol, 3 eq.) was added to a solution of compound **3/3R/3S** (942 mg, 3.51 mmol, 1 eq.) in methylene chloride (20 mL) and then the mixture was stirred at 25°C for 3 hours. The reaction was monitored by TLC and when it was completed the reaction mixture was evaporated. The remaining trifluoroacetic acid was removed by redissolving the mixture in toluene and evaporating to dryness at 50°C three times. Compound **10**, **10R/10S** was obtained as a yellow oil in quantitative yield (745.0 mg) and was used in the next step without further purification.

**HRMS** (ESI-TTOF)  $m/z$   $[\text{M}+\text{H}]^+$  calculated for  $\text{C}_{10}\text{H}_{13}\text{O}_5$  213.0757 found 213.0759

**$^1\text{H}$  NMR** (500 MHz,  $\text{CDCl}_3$ ):  $\delta$  8.30 (s, 1H), 3.79 (s, 3H), 2.78 – 2.65 (m, 2H), 2.58 – 2.53 (m, 1H), 2.08 – 2.02 (m, 1H), 1.56 (s, 1H).

**$^{13}\text{C}$  NMR** (125 MHz,  $\text{CDCl}_3$ ):  $\delta$  202.1, 172.6, 165.2, 163.4, 126.0, 53.2, 45.4, 34.6, 31.8, 24.5;

### Preparation of 1-benzyl 3-methyl-3-methyl-6-oxocyclohex-1-ene-1,3-dicarboxylate (**12**, **12R/12S**):

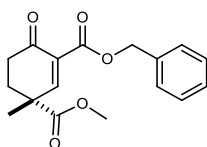

Following the **General Procedure A** using: **S1c** (300 mg, 1.5 mmol), **S2b** (190 mg, 1.6 mmol), and TEA (41  $\mu\text{l}$ , 0.3 mmol) or **S3a/S3b** (20.8 mg, 0.03 mmol) in 1,4-dioxane (1.5 mL, 1.0 M) at room temperature for 2 days. After removal of the volatile compounds under reduced pressure, purification by flash chromatography on silica gel (hexanes 0-25% ethyl acetate) gave the product as a yellow oil (99.0 mg, 22% for **12**, 155.8 mg, 35% for **12R**, 180.4 mg, 41% for **12S**).

**ee**: 92% with catalyst **S3a** (**12R**)

**ee**: -80% with catalyst **S3b** (**12S**)

**HRMS** (ESI-TTOF)  $m/z$   $[\text{M}+\text{H}]^+$  calculated for  $\text{C}_{17}\text{H}_{19}\text{O}_5$  303.1227 found 303.1224

**$^1\text{H}$  NMR** (500 MHz,  $\text{CDCl}_3$ ):  $\delta$  7.51 (s, 1H), 7.43 – 7.39 (m, 2H), 7.36 (ddd,  $J = 5.9, 3.5, 1.2$  Hz, 2H), 7.32 (dt,  $J = 5.4, 2.1$  Hz, 1H), 5.25 (d,  $J = 3.4$  Hz, 2H), 3.74 (s, 3H), 2.61 – 2.51 (m, 2H), 2.51 – 2.43 (m, 1H), 1.98 (ddd,  $J = 14.0, 9.4, 5.0$  Hz, 1H), 1.47 (s, 3H).

**$^{13}\text{C}$  NMR** (125 MHz,  $\text{CDCl}_3$ ):  $\delta$  193.2, 173.5, 164.1, 155.9, 135.5, 131.7, 128.6, 128.6, 128.3, 128.2, 67.1, 52.9, 44.4, 35.3, 32.0, 24.6;

**Preparation of 1-(tert-butyl) 3-methyl-3-allyl-6-oxocyclohex-1-ene-1,3-dicarboxylate (13, 13R/13S):**

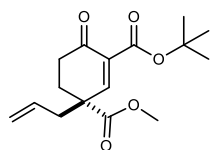

Following the **General Procedure A** using: **S1a** (14.3 g, 83.8 mmol), **S2e** (13.1 g, 92.2 mmol) and TEA (1.17 mL, 8.38 mmol) or catalyst **S3a/S3b** (1.15 g, 1.68 mmol) in 1,4-dioxane (84 mL, 1.0 M) at room temperature for 2 days. After removal of the volatile compounds under reduced pressure, purification by flash chromatography on silica gel (hexanes 0-25% ethyl acetate) gave the product as a yellow oil (12.17 g, 50% for **13**, 18.4 g, 75% for **13R**, 12.1 g, 49% for **13S**).

*ee*: 99+% with catalyst **S3a** (**13S**)

*ee*: -99+% with catalyst **S3b** (**13R**)

**HRMS** (ESI-TTOF)  $m/z$   $[M+H]^+$  calculated for  $C_{16}H_{23}O_5$  295.1540 found 295.1543

**$^1H$  NMR** (500 MHz,  $CDCl_3$ ):  $\delta$  7.30 (d,  $J = 1.27$  Hz, 1H), 5.71 – 5.6 (m, 1H), 5.1 – 5.12 (m, 2H), 3.73 (s, 3H), 2.57-2.51 (m, 3H), 2.49 (t,  $J = 5.76$  Hz, 1H), 2.45 – 2.38 (m, 1H), 2.03 – 1.97 (m, 1H), 1.50 (s, 9H).

**$^{13}C$  NMR** (125 MHz,  $CDCl_3$ ):  $\delta$  193.7, 172.6, 163.7, 152.8, 133.9, 131.5, 120.2, 82.3, 52.7, 48.2, 42.8, 35.4, 29.8, 28.1;

**Preparation of ethyl 3-benzoyl-3-methyl-6-oxocyclohex-1-ene-1-carboxylate (14):**

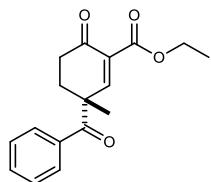

Following the **General Procedure A** using: **S1d** (426.5 mg, 3.0 mmol), **S2i** (535.3 mg, 3.0 mmol), and TEA (42  $\mu$ l, 0.3 mmol) in 1,4-dioxane (3 mL, 1.0 M) at room temperature for 2 days. After removal of the volatile compounds under reduced pressure, purification by flash chromatography on silica gel (hexanes 0-25% ethyl acetate) gave the product as a yellow oil (409.0 mg, 48%).

**HRMS** (ESI-TTOF)  $m/z$   $[M+H]^+$  calculated for  $C_{17}H_{19}O_4$  287.1277 found 287.1289

**$^1H$  NMR** (500 MHz,  $CDCl_3$ ):  $\delta$  7.77 (d,  $J = 7.7$  Hz, 1H), 7.72 (s, 1H), 7.54 (t,  $J = 7.5$  Hz, 1H), 7.45 (t,  $J = 7.7$  Hz, 1H), 4.28 (q,  $J = 7.2$  Hz, 1H), 2.74 – 2.68 (m, 1H), 2.66 – 2.56 (m, 2H), 2.12 – 2.07 (m, 1H), 1.62 (s, 3H), 1.32 (t,  $J = 7.1$  Hz, 3H).

**$^{13}C$  NMR** (125 MHz,  $CDCl_3$ ):  $\delta$  201.3, 193.3, 164.2, 156.9, 136.6, 132.6, 131.3, 128.6, 128.5, 61.4, 49.8, 35.2, 32.9, 30.0, 14.1;

### Preparation of *tert*-butyl 3-benzoyl-3-methyl-6-oxocyclohex-1-ene-1-carboxylate (15):

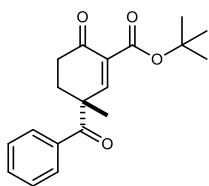

Following the **General Procedure A** using: **S1a** (85 mg, 0.5 mmol), **S2i** (89 mg, 0.55 mmol), and TEA (14  $\mu$ l, 0.1 mmol) in 1,4-dioxane (0.5 mL, 1.0 M) at room temperature for 2 days. After removal of the volatile compounds under reduced pressure, purification by flash chromatography on silica gel (hexanes 0-25% ethyl acetate) gave the product as a yellow oil (72.0 mg, 46%).

**HRMS** (ESI-TTOF)  $m/z$   $[M+H]^+$  calculated for  $C_{19}H_{23}O_4$  315.1590 found 315.1596

**$^1H$  NMR** (500 MHz,  $CDCl_3$ ):  $\delta$  7.77 – 7.72 (m, 2H), 7.56 (s, 1H), 7.54 – 7.49 (m, 1H), 7.47 – 7.39 (m, 2H), 2.70 – 2.62 (m, 1H), 2.56 (tdt,  $J = 17.1, 8.3, 4.3$  Hz, 2H), 2.08 – 2.00 (m, 1H), 1.57 (s, 3H), 1.49 (s, 9H).

**$^{13}C$  NMR** (125 MHz,  $CDCl_3$ ):  $\delta$  201.7, 193.5, 163.7, 155.4, 136.7, 132.6, 128.7, 128.6, 82.3, 58.0, 49.7, 35.4, 33.1, 28.1, 24.1;

### Preparation of 3-(*tert*-butyl) 1-ethyl (*S*)-4-oxo-[1,1'-bi(cyclohexan)]-2-ene-1,3-dicarboxylate (16):

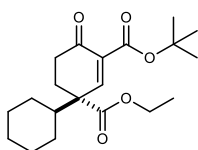

Following the **General Procedure A** using: **S1a** (85.1 mg, 0.50 mmol), **S2j** (109 mg, 0.55 mmol), and DBU (15  $\mu$ L, 0.10 mmol) in 1,4-dioxane (0.50 mL, 1.0 M) at room temperature for 2 days. After removal of the volatile compounds under reduced pressure, purification by flash chromatography on silica gel (hexanes 0-25% ethyl acetate) gave the product as a yellow oil (39.0 mg, 22%).

**HRMS** (ESI-TTOF)  $m/z$   $[M+H]^+$  calculated for  $C_{20}H_{31}O_5$  351.2166 found 351.2172

**$^1H$  NMR** (500 MHz,  $CDCl_3$ ):  $\delta$  7.49 (d,  $J = 1.7$  Hz, 1 H), 4.28 (q,  $J = 7.1$  Hz, 2 H), 4.26 – 4.13 (m, 2 H), 2.59 – 2.48 (m, 2 H), 2.40 – 2.35 (m, 1 H), 2.04 (dt,  $J = 13.2, 5.3$  Hz, 1 H), 1.90 (tt,  $J = 12.1, 2.9$  Hz, 1 H), 1.83 – 1.77 (m, 2 H), 1.69 (d,  $J = 12.9$  Hz, 1 H), 1.64 – 1.57 (m, 2 H), 1.33 (t,  $J = 7.1$  Hz, 3 H), 1.28 (t,  $J = 7.1$  Hz, 4 H), 1.24 – 1.01 (m, 4 H).

**$^{13}C$  NMR** (125 MHz,  $CDCl_3$ ):  $\delta$  194.4, 171.1, 163.9, 154.8, 133.9, 82.1, 61.4, 652.1, 46.1, 36.1, 28.2, 28.1, 27.9, 27.7, 26.7, 26.2, 26.0, 14.3;

### Preparation of 3-ethyl 1-methyl 3-methyl-6-oxocyclohexa-1,4-diene-1,3-dicarboxylate (17):

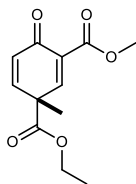

To a stirred solution of compound **11** (1.01 g, 4.2 mmol) in anhydrous 1,4-dioxane (40 mL) were added 4Å molecular sieves and camphorsulfonic acid (0.54 g, 2.3 mmol). DDQ (1.16 g, 5.1 mmol) was added portionwise with vigorous stirring. The reaction mixture was heated to reflux and stirred for 48 hours. Upon completion, the mixture was cooled to 0°C, filtered through a pad of Celite, washed with 1,4-dioxane, and the solvent was evaporated under reduced pressure. The residue was dissolved in toluene, distilled water was added, then the pH was adjusted to 7-8 with a saturated NaHCO<sub>3</sub> solution. The organic layer was washed with brine, dried over Na<sub>2</sub>SO<sub>4</sub>, the solvent was removed under reduced pressure to give the product as a yellow oil (0.65 g, 65%).

**HRMS** (ESI-TTOF) *m/z* [M+H]<sup>+</sup> calculated for C<sub>12</sub>H<sub>15</sub>O<sub>5</sub> 239.0914 found 239.0917

**<sup>1</sup>H NMR** (500 MHz, CDCl<sub>3</sub>): δ 7.67 (d, *J* = 3.0 Hz, 1H), 7.01 (dd, *J* = 10.1, 3.0 Hz, 1H), 6.31 (d, *J* = 10.1 Hz, 1H), 4.19 (q, *J* = 7.2 Hz, 2H), 3.84 (s, 3H), 1.59 (s, 3H), 1.26 (t, *J* = 7.1 Hz, 3H).

**<sup>13</sup>C NMR** (125 MHz, CDCl<sub>3</sub>): δ 180.6, 169.8, 164.8, 153.7, 147.6, 131.7, 129.6, 62.8, 52.5, 48.5, 24.9, 14.1;

### Preparation of methyl 2-formyl-3-(pyridin-4-yl)propanoate (S2k):

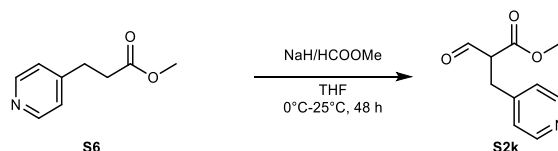

Compound **S6** was synthesized according to literature procedures.<sup>5</sup>

A flame-dried vial under a nitrogen atmosphere was charged with NaH (73.0mg, 3.00mmol, 1 eq.) anhydrous THF (9 mL) and methyl-formate (1.90 mL, 30.0 mmol, 10 eq.). The reaction mixture was cooled to 0°C then a THF solution (3 mL) of compound **S6** was added dropwise and was stirred for 10 minutes at 0°C. The reaction mixture was warmed to 25°C where it was stirred for 2 days. When the reaction was completed, the reaction was quenched with 50 mL of water and extracted with diethyl ether three times. The pH of the aqueous phase was adjusted to 7 by the addition of 10% citric acid solution then it was extracted three times with ethyl acetate. The combined ethyl acetate phases were dried over anhydrous Na<sub>2</sub>SO<sub>4</sub>, filtered and the solvent was removed under reduced pressure. Compound **S2k** was obtained without further purification as a yellow solid (205 mg, 35%).

**<sup>1</sup>H NMR** (500 MHz, CDCl<sub>3</sub>): δ 8.46-8.44 (m, 2H), 8.03 (s, 1H), 7.31 (d, *J* = 5.1 Hz, 2H), 3.69 (s, 3H), 3.68 (s, 1H), 3.40 (s, 2H)

**<sup>13</sup>C NMR** (125 MHz, CDCl<sub>3</sub>) partial: δ 150.4, 149.3, 123.9, 51.8, 51.1, 32.9;

### Preparation of 1-(*tert*-butyl) 3-methyl (*S*)-6-oxo-3-(pyridin-4-ylmethyl)cyclohex-1-ene-1,3-dicarboxylate (**S7**):

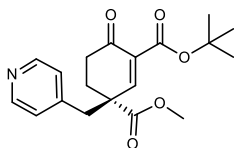

Following the **General Procedure A** using: **S1a** (201 mg, 1.18 mmol), **S2k** (209 mg, 1.08 mmol), and **3a** (14,7 mg, 0.02 mmol) in 1,4-dioxane (1.1 mL, 1.0 M) at room temperature for 6 days. After removal of the volatile compounds under reduced pressure, purification by flash chromatography on silica gel (hexanes 0-25% ethyl acetate) gave the product as a yellow oil (120.0 mg, 32%).

**ee**: 90% with catalyst **S3a** (**S7**)

**HRMS** (ESI-TTOF)  $m/z$   $[M+H]^+$  calculated for  $C_{19}H_{24}NO_5$  346.1648 found 346.1656

**$^1H$  NMR** (500 MHz,  $CDCl_3$ ):  $\delta$  8.53 (d,  $J = 5.3$  Hz, 2H), 7.32 (s, 1H), 7.03 (d,  $J = 6.0$  Hz, 2H), 3.71 (d,  $J = 5.4$  Hz, 3H), 3.08 (d,  $J = 13.1$  Hz, 2H), 2.59 – 2.46 (m, 2H), 2.43 – 2.35 (m, 1H), 2.03 (dq,  $J = 9.3, 5.7$  Hz, 1H), 1.50 (s, 9H).

**$^{13}C$  NMR** (125 MHz,  $CDCl_3$ ):  $\delta$  193.0, 172.1, 163.4, 151.5, 150.1, 144.1, 134.2, 125.1, 82.5, 52.9, 48.9, 43.6, 35.2, 30.3, 28.1;

### General procedure B for the amidation of compound **10**:

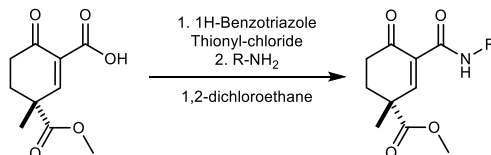

1*H*-benzotriazole (4 eq.) was dissolved in 1,2-dichloroethane (0.75 M) under a nitrogen atmosphere and was left to stir for 10 minutes at 25°C. To this solution thionyl chloride (1.1 eq.) was added dropwise and was stirred for 30 minutes at 25°C. The reaction mixture was cooled to 0°C and was stirred for 15 minutes. A 1,2-dichloroethane solution of compound **10** (0.88 M, 1 eq.) was added dropwise to the reaction mixture which was stirred at 0°C for 24 hours. When the carboxylic acid was completely consumed the reaction mixture was filtered, the filtrate was washed two times with 1,2-dichloroethane, and the organic phase was washed three times with a saturated  $NaHCO_3$  solution. The organic phase was dried over anhydrous  $Na_2SO_4$ , filtered, then the corresponding amine (1.2 eq.) was added, and the reaction mixture was stirred for 1 hour. After the reaction was completed, the mixture was washed two times with a 10% HCl solution, two times with a saturated  $Na_2CO_3$  solution, and once with brine. The organic phase was dried over anhydrous  $Na_2SO_4$ , filtered, the solvent was removed under reduced pressure. The product was purified with flash chromatography (hexanes 0-25% ethyl acetate) if necessary.



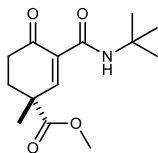

Compound **18/18R** was synthesized according to the **General procedure B** using: 1*H*-benzotriazole (560 mg, 4.72 mmol, 4 eq.), thionyl chloride (94.0  $\mu$ L, 1.30 mmol, 1.1 eq.), compound **10/10R** (250.0 mg, 1.18 mmol, 1 eq.), *tert*-butylamine (149.0  $\mu$ L, 1.41 mmol, 1.2 eq.) and was obtained as a yellow oil (177.0 mg, 56%).

**HRMS** (ESI-TTOF)  $m/z$   $[M+H]^+$  calculated for  $C_{14}H_{22}NO_4$  268.1543 found 268.1550

**$^1H$  NMR** (500 MHz,  $CDCl_3$ ):  $\delta$  8.60 (s, 1H), 8.09 (s, 1H), 3.74 (s, 3H), 2.65 – 2.53 (m, 2H), 2.52 – 2.45 (m, 1H), 1.98 – 1.92 (m, 1H), 1.50 (s, 3H), 1.40 (s, 9H).

**$^{13}C$  NMR** (125 MHz,  $CDCl_3$ ):  $\delta$  199.4, 173.7, 161.4, 159.6, 130.0, 52.9, 51.2, 44.9, 36.1, 32.2, 28.8, 24.8;

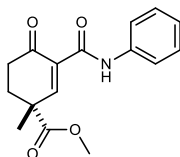

Compound **19** was synthesized according to the **General procedure B** using: 1*H*-benzotriazole (560 mg, 4.72 mmol, 4 eq.), thionyl chloride (94.0  $\mu$ L, 1.30 mmol, 1.1 eq.), compound **10** (250.0 mg, 1.18 mmol, 1 eq.), aniline (129.0  $\mu$ L, 1.41 mmol, 1.2 eq.) and was obtained as an orange oil (267.0 mg, 79%).

**HRMS** (ESI-TTOF)  $m/z$   $[M+H]^+$  calculated for  $C_{16}H_{18}NO_4$  288.1230 found 288.1234

**$^1H$  NMR** (500 MHz,  $CDCl_3$ ):  $\delta$  10.68 (s, 1H), 8.20 (s, 1H), 7.66 – 7.64 (m, 2H), 7.36 – 7.32 (m, 2H), 7.14 – 7.11 (m, 1H), 3.77 (s, 3H), 2.74 – 2.61 (m, 2H), 2.56 – 2.51 (m, 1H), 2.05 – 1.99 (m, 1H), 1.55 (s, 3H).

**$^{13}C$  NMR** (125 MHz,  $CDCl_3$ ):  $\delta$  199.6, 173.5, 161.5, 160.4, 138.0, 129.3, 129.1, 124.6, 120.6, 53.0, 45.2, 36.0, 32.2, 24.8;

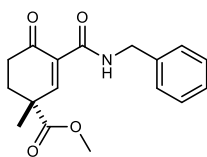

Compound **20** was synthesized according to the **General procedure B** using: 1*H*-benzotriazole (337 mg, 2.83 mmol, 4 eq.), thionyl chloride (56.5  $\mu$ L, 0.78 mmol, 1.1 eq.), compound **10** (150.0 mg, 0.71 mmol, 1 eq.), benzylamine (92.0  $\mu$ L, 0.85 mmol, 1.2 eq.) and was obtained as a yellow oil (168.0 mg, 79%).

**HRMS** (ESI-TTOF)  $m/z$   $[M+H]^+$  calculated for  $C_{17}H_{20}NO_4$  302.1386 found 302.1379

**$^1H$  NMR** (500 MHz,  $CDCl_3$ ):  $\delta$  8.99 (s, 1H), 8.17 (s, 1H), 7.35-7.30 (m, H), 4.56 (dd,  $J$  = 5.8, 2.5 Hz, 2H), 3.75 (s, 3H), 2.66 – 2.55 (m, 2H), 2.53 – 2.46 (m, 1H), 2.00 – 1.94 (m, 1H), 1.51 (s, 3H).

<sup>13</sup>C NMR (125 MHz, CDCl<sub>3</sub>): δ 199.2, 173.6, 162.6, 160.7, 138.3, 129.1, 128.7, 127.8, 127.4, 53.0, 45.0, 43.7, 36.0, 32.2, 24.8;

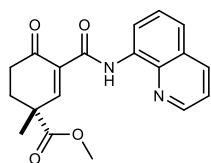

Compound **21** was synthesized according to the **General procedure B** using: 1H-benzotriazole (532 mg, 4.47 mmol, 4 eq.), thionyl chloride (89.0 μL, 0.15 mmol, 1.1 eq.), compound **10** (237.0 mg, 1.12 mmol, 1 eq.), quinoline-8-amine (193 mg, 1.34 mmol, 1.2 eq.) and was obtained as a brown oil (237.0 mg, 63%).

**HRMS** (ESI-TTOF) m/z [M+H]<sup>+</sup> calculated for C<sub>19</sub>H<sub>19</sub>N<sub>2</sub>O<sub>4</sub> 339.1339 found 339.1333

<sup>1</sup>H NMR (500 MHz, CDCl<sub>3</sub>): δ 12.50 (s, 1H), 8.94 (dd, *J* = 4.2, 1.7 Hz, 1H), 8.87 (dd, *J* = 6.5, 2.5 Hz, 1H), 8.26 (s, 1H), 8.11 (dd, *J* = 8.3, 1.7 Hz, 1H), 7.53 – 7.49 (m, 2H), 7.42 (dd, *J* = 8.2, 4.2 Hz, 1H), 3.74 (s, 3H), 2.77 – 2.65 (m, 2H), 2.55 – 2.50 (m, 1H), 2.06 – 1.99 (m, 1H), 1.54 (s, 3H).

<sup>13</sup>C NMR (125 MHz, CDCl<sub>3</sub>): δ 198.8, 173.6, 160.9, 160.8, 148.9, 139.6, 136.2, 135.2, 130.2, 128.2, 127.2, 122.4, 121.6, 118.1, 52.9, 45.1, 36.0, 32.1, 24.8;

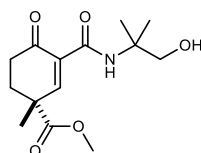

Compound **22** was synthesized according to the **General procedure B** using: 1H-benzotriazole (674 mg, 5.66 mmol, 4 eq.), thionyl chloride (113.0 μL, 1.56 mmol, 1.1 eq.), compound **10** (300.0 mg, 1.41 mmol, 1 eq.), 2-amino-2-methyl-1-propanol (168.0 mg, 1.70 mmol, 1.2 eq.) and was obtained as a yellow oil (220.0 mg, 55%).

**HRMS** (ESI-TTOF) m/z [M+H]<sup>+</sup> calculated for C<sub>14</sub>H<sub>22</sub>NO<sub>5</sub> 284.1492 found 284.1486

<sup>1</sup>H NMR (300 MHz, CDCl<sub>3</sub>): δ 8.96 (s, 1H), 8.13 (s, 1H), 3.76 (s, 3H), 3.62 (d, *J* = 4.1 Hz, 2H), 2.65 – 2.55 (m, 2H), 2.54 – 2.41 (m, 1H), 2.05 – 1.90 (m, 1H), 1.51 (s, 3H), 1.34 (s, 6H).

<sup>13</sup>C NMR (75 MHz, CDCl<sub>3</sub>): δ 199.3, 173.4, 162.9, 160.7, 129.1, 70.8, 56.4, 53.0, 45.0, 35.9, 32.1, 29.8, 24.8, 24.74, 24.71;

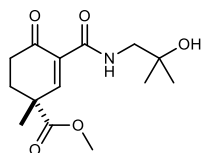

Compound **23** was synthesized according to the **General procedure B** using: 1H-benzotriazole (1.15g, 9.69 mmol, 4 eq.), thionyl chloride (194.5 μL, 2.66 mmol, 1.1 eq.), compound **10** (514.0 mg, 2.42 mmol, 1 eq.), 1-amino-2-methylpropan-2-ol (259.1 mg, 2.91 mmol, 1.2 eq.) and was obtained as a yellow oil (386.0 mg, 56%).

**HRMS** (ESI-TTOF) m/z [M+H]<sup>+</sup> calculated for C<sub>14</sub>H<sub>22</sub>NO<sub>5</sub> 284.1492 found 284.1486

<sup>1</sup>H NMR (300 MHz, CDCl<sub>3</sub>): δ 9.00 (s, 1H), 8.15 (s, 1H), 3.75 (s, 3H), 3.39 (dd, *J* = 5.9, 2.6 Hz, 2H), 2.66-2.57 (m, 2H), 2.50 – 2.44 (m, 1H), 2.04 – 1.92 (m, 1H), 1.52 (s, 3H), 1.25 (s, 6H).

<sup>13</sup>C NMR (75 MHz, CDCl<sub>3</sub>): δ 199.1, 173.5, 163.9, 160.7, 128.9, 71.1, 52.9, 50.9, 45.0, 43.5, 35.9, 32.1, 27.5, 27.4, 24.7;

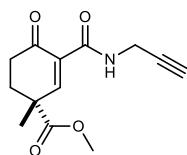

Compound **S8** was synthesized according to the **General procedure B** using: 1*H*-benzotriazole (1.12 g, 9.43 mmol, 4 eq.), thionyl chloride (189 μL, 2.60 mmol, 1.1 eq.), compound **10** (500.0 mg, 2.36 mmol, 1 eq.), propargylamine (181 μL, 1.34 mmol, 1.2 eq.) and was obtained as a red oil (182.0 mg, 30%).

**HRMS** (ESI-TTOF) *m/z* [M+H]<sup>+</sup> calculated for C<sub>13</sub>H<sub>16</sub>NO<sub>4</sub> 250.1073 found 250.1078

<sup>1</sup>H NMR (500 MHz, CDCl<sub>3</sub>): δ 8.89 (s, 1H), 8.16 (s, 1H), 4.17 – 4.14 (m, 2H), 3.75 (s, 3H), 2.88 (s, 1H), 2.64 – 2.57 (m, 2H), 2.53 – 2.47 (m, 1H), 2.24 – 2.22 (m, 1H), 1.51 (s, 3H).

<sup>13</sup>C NMR (125 MHz, CDCl<sub>3</sub>): δ 198.9, 173.4, 162.5, 161.1, 128.7, 71.4, 53.0, 45.0, 38.7, 35.9, 32.1, 29.2, 24.8;

#### Preparation of 3-amino-*N,N*-dimethylbenzamide (**S9**):

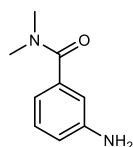

Compound **S9** was prepared according to the literature procedures.<sup>6,7</sup>

#### Preparation of methyl (*S*)-3-((3-(dimethylcarbamoyl)phenyl)carbamoyl)-1-methyl-4-oxocyclohex-2-ene-1-carboxylate (**19'S**):

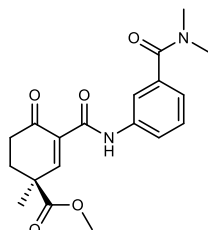

Compound **10S** (50.0 mg, 0.236 mmol, 1 eq.) was dissolved in anhydrous dimethylformamide (0.50 mL) in a flame-dried vial under a nitrogen atmosphere, HBTU (89.4 mg, 0.236 mmol, 1 eq.) and *N*-methylmorpholine (51.8 μL, 0.471 mmol, 2.0 eq.) were added and the mixture was stirred at 25°C. After 30 minutes an anhydrous DMF solution (0.50 mL) of compound **S9** (48.4 mg, 0.295 mmol, 1.25 eq.) was added and the reaction mixture was stirred at 25°C for 3 days. The reaction was monitored by HPLC-MS and when the starting material was consumed the reaction mixture was diluted with ethyl acetate, washed two times with a 5% citric acid solution, two times with a saturated aqueous Na<sub>2</sub>CO<sub>3</sub> solution, and two times with brine. The organic phase was dried over anhydrous Na<sub>2</sub>SO<sub>4</sub>, filtered, then evaporated under reduced pressure. The resulting crude product was purified by preparative RP-HPLC using a gradient method on a Gemini<sup>®</sup> 5μm C18 110 Å column (H<sub>2</sub>O:MeCN = 95:5 (0.1 % HCOOH) to 100% MeCN (0.1 % HCOOH)). Compound **19'S** was obtained as a yellow oil (62.7 mg, 74.2%).

**HRMS** (ESI-TTOF) *m/z* [M+H]<sup>+</sup> calculated for C<sub>19</sub>H<sub>23</sub>N<sub>2</sub>O<sub>5</sub> 359.1601 found 359.1594

**<sup>1</sup>H NMR** (500 MHz, CDCl<sub>3</sub>): δ 10.77 (s, 1H), 8.25 (s, 1H), 7.76 (t, *J* = 1.9 Hz, 1H), 7.67 (dt, *J* = 8.2, 1.6 Hz, 1H), 7.37 (t, *J* = 7.9 Hz, 1H), 7.19 (dt, *J* = 7.6, 1.3 Hz, 1H), 3.77 (s, 3H), 3.11 (s, 3H), 3.00 (s, 3H), 2.74 – 2.61 (m, 2H), 2.56 – 2.51 (m, 1H), 2.05 – 2.00 (m, 1H), 1.55 (s, 3H).

**<sup>13</sup>C NMR** (125 MHz, CDCl<sub>3</sub>) partial: δ 199.5, 173.3, 171.1, 161.7, 160.5, 137.9, 137.2, 129.2, 129.1, 123.2, 121.5, 119.2, 53.0, 45.1, 35.9, 32.0, 24.7;

**Preparation of methyl 1-methyl-3-(5-methyloxazol-2-yl)-4-oxocyclohex-2-ene-1-carboxylate (24):**

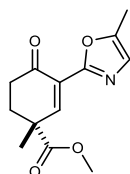

Compound **S7** (75.0 mg, 0.301 mmol, 1 eq.) was dissolved in 1,4-dioxane (0.50 mL), TfOH was added (80 μL, 0.903 mmol, 1.1 eq.) and the reaction mixture was stirred at 90°C for 3 hours. After the reaction was completed, the mixture was diluted with ethyl acetate then washed two times with a saturated NaHCO<sub>3</sub> solution. The organic phase was washed with brine then dried over anhydrous Na<sub>2</sub>SO<sub>4</sub>, filtered, and evaporated under reduced pressure. The crude product was purified by column chromatography (hexane: ethyl acetate) and compound **24** was obtained as a yellow oil (26.0 mg, 35%).

**HRMS** (ESI-TTOF) *m/z* [M+H]<sup>+</sup> calculated for C<sub>13</sub>H<sub>16</sub>NO<sub>4</sub> 250.1073 found 250.1067

**<sup>1</sup>H NMR** (500 MHz, CDCl<sub>3</sub>): δ 7.53 (s, 1H), 6.79 (d, *J* = 1.1 Hz, 1H), 3.75 (s, 3H), 2.68 – 2.60 (m, 2H), 2.54 – 2.49 (m, 1H), 2.34 (d, *J* = 1.1 Hz, 3H), 2.05 – 2.00 (m, 1H), 1.51 (s, 3H).

**<sup>13</sup>C NMR** (125 MHz, CDCl<sub>3</sub>): δ 193.8, 174.0, 156.5, 152.1, 149.5, 127.3, 124.1, 52.9, 44.6, 35.6, 32.2, 25.1, 11.0;

**Preparation of methyl 3,3-dimethyl-5-oxocyclopent-1-ene-1-carboxylate (25):**

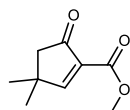

Compound **25** was prepared according to the literature procedures.<sup>8-10</sup>

**Preparation of tert-butyl 3,3-dimethyl-5-oxocyclopent-1-ene-1-carboxylate (26):**

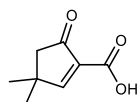

Compound **S10** was prepared according to the literature procedures.<sup>8-10</sup>

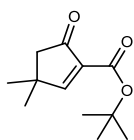

Compound **S10** (50.0 mg, 0.324 mmol, 1 eq.) was dissolved in anhydrous dimethylformamide (2.50 mL) in a flame-dried vial under a nitrogen atmosphere, HBTU (123.0 mg, 0.324 mmol, 1 eq.) and *N*-methylmorpholine (71.3  $\mu$ L, 0.649 mmol, 2.0 eq.) were added and the mixture was stirred at 25°C. After 30 minutes *tert*-butyl alcohol (62.0  $\mu$ L, 0.649 mmol, 2 eq.) was added and the reaction mixture was stirred at 25°C for 3 days. The reaction was monitored by HPLC-MS and when the starting material was consumed the reaction mixture was diluted with ethyl acetate, washed two times with a 5% citric acid solution, two times with a saturated aqueous Na<sub>2</sub>CO<sub>3</sub> solution, and two times with brine. The organic phase was dried over anhydrous Na<sub>2</sub>SO<sub>4</sub>, filtered, then evaporated under reduced pressure. The resulting crude product was purified by preparative RP-HPLC using a gradient method on a Gemini® 5 $\mu$ m C18 110 Å column (H<sub>2</sub>O:MeCN = 95:5 (0.1 % HCOOH) to 100% MeCN (0.1 % HCOOH)). Compound **26** was obtained as a yellow oil (40.0 mg, 58.7%).

**HRMS** (ESI-TTOF) *m/z* [M+H]<sup>+</sup> calculated for C<sub>12</sub>H<sub>19</sub>O<sub>3</sub> 211.1328 found 211.1324

**<sup>1</sup>H NMR** (500 MHz, CDCl<sub>3</sub>):  $\delta$  7.97 (s, 1H), 2.39 (s, 2H), 1.53 (s, 9H), 1.27 (s, 6H).

**<sup>13</sup>C NMR** (125 MHz, CDCl<sub>3</sub>):  $\delta$  202.9, 178.7, 161.2, 135.1, 81.9, 51.4, 38.6, 28.2, 27.6;

#### Preparation of dimethyl 3-methyl-5-oxocyclopent-1-ene-1,3-dicarboxylate (**S16**):

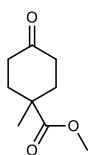

Compound **9** (517 mg, 3.07 mmol, 1 eq.) was dissolved in ethyl acetate (3.11 mL) in a vial under a nitrogen atmosphere. 20.0 mg of 10% palladium on carbon was added and the reaction mixture was purged with hydrogen with the use of a balloon. After purging the atmosphere, three hydrogen balloons were attached to the vial and the mixture was vigorously stirred for 16 hours at 25°C. The reaction was monitored by HPLC-MS and when the starting material was consumed the reaction mixture was diluted with ethyl acetate and filtered through a pad of Celite which was washed two times with ethyl acetate. The solvent was evaporated under reduced pressure affording compound **S11** as a colorless oil without further purification (463.0 mg, 88%).

**HRMS** (ESI-TTOF) *m/z* [M+H]<sup>+</sup> calculated for C<sub>9</sub>H<sub>15</sub>O<sub>3</sub> 171.1021 found 171.1023

**<sup>1</sup>H NMR** (500 MHz, CDCl<sub>3</sub>):  $\delta$  3.76 (s, 3H), 2.47 – 2.37 (m, 4H), 2.36 – 2.27 (m, 2H), 1.75 – 1.63 (m, 2H), 1.31 (s, 3H).

**<sup>13</sup>C NMR** (125 MHz, CDCl<sub>3</sub>):  $\delta$  210.9, 176.8, 52.2, 42.5, 38.5, 35.3, 25.7;

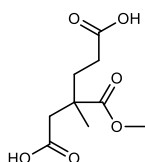

To a suspension of compound **S11** (400.0 mg, 2.35 mmol, 1 eq.) and  $\text{KMnO}_4$  (742.8 mg, 4.70 mmol, 2 eq.) in water (14 mL) was added a solution of  $\text{NaOH}$  (35.0 mg, 0.869 mmol, 0.36 eq.) in water (2 mL). The reaction was stirred at 25°C for 16 h, over which time the solid dissolved. A saturated aqueous  $\text{NaHSO}_3$  solution was added until the purple color disappeared. The reaction mixture was filtered through a pad of Celite which was washed two times with diethyl ether to remove the brown solid. The filtrate was acidified with conc.  $\text{HCl}$  until pH 1. The reaction was washed with diethyl ether three times, and the combined extracts were dried over anhydrous  $\text{Na}_2\text{SO}_4$ , the solvent was evaporated under reduced pressure, affording compound **S12** as a colorless oil without further purification (240.0 mg, 47%).

**HRMS** (ESI-TTOF)  $m/z$   $[\text{M}+\text{H}]^+$  calculated for  $\text{C}_9\text{H}_{15}\text{O}_6$  219.0868 found 219.0871

**$^1\text{H}$  NMR** (500 MHz,  $\text{CDCl}_3$ ):  $\delta$  3.70 (s, 3H), 2.77 (d,  $J = 16.5$  Hz, 1H), 2.58 (d,  $J = 16.4$ , 1.4 Hz, 1H) 2.38 (t,  $J = 8.1$  Hz, 2H), 2.03 (ddd,  $J = 14.1$ , 9.2, 6.8 Hz, 1H), 1.94 (ddd,  $J = 14.1$ , 9.4, 6.5 Hz, 1H), 1.30 (s, 3H).

**$^{13}\text{C}$  NMR** (125 MHz,  $\text{CDCl}_3$ ):  $\delta$  179.5, 177.4, 175.9, 52.4, 43.3, 42.5, 33.3, 29.4, 21.7;

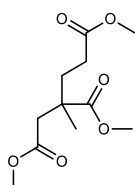

To compound **S12** (240.0 mg, 1.10 mmol, 1 eq.) in toluene (2.5 mL) was added  $\text{MeOH}$  (245  $\mu\text{L}$ , 6.05 mmol, 5.5 eq.) and cc.  $\text{H}_2\text{SO}_4$  (91  $\mu\text{L}$ , 1.70 mmol, 1.6 eq.). The reaction was stirred for 16 hours at 90°C and after cooling to room temperature the organic solvent was removed under reduced pressure. The residue was diluted with ethyl acetate and washed with a saturated  $\text{NaHCO}_3$  solution and brine two times. The organic layer was dried over anhydrous  $\text{Na}_2\text{SO}_4$ , the solvent was evaporated under reduced pressure affording compound **S13** as a yellow oil without further purification (163.0 mg, 60%).

**HRMS** (ESI-TTOF)  $m/z$   $[\text{M}+\text{H}]^+$  calculated for  $\text{C}_{11}\text{H}_{19}\text{O}_6$  247.1181 found 247.1189

**$^1\text{H}$  NMR** (500 MHz,  $\text{CDCl}_3$ ):  $\delta$  3.70 (s, 3H), 3.67 (s, 3H), 3.66 (s, 3H), 2.76 (d,  $J = 15.9$  Hz, 1H), 2.46 (d,  $J = 15.9$  Hz, 1H), 2.38 – 2.23 (m, 2H), 2.01 (ddd,  $J = 14.0$ , 10.3, 6.0 Hz, 1H), 1.89 (ddd,  $J = 14.0$ , 10.2, 6.4 Hz, 1H), 1.27 (s, 3H).

**$^{13}\text{C}$  NMR** (125 MHz,  $\text{CDCl}_3$ ):  $\delta$  175.9, 173.5, 171.4, 52.2, 51.8, 51.7, 43.7, 42.7, 33.9, 29.5, 21.7;

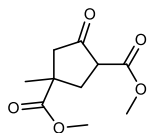

A solution of KO<sup>t</sup>Bu (111.4 mg, 0.993 mmol, 1.5 eq.) in anhydrous THF (1 mL) was cooled to 0 °C and compound **S13** in anhydrous THF (1.5 mL) was added dropwise. The reaction was allowed to stir at 25°C for 1.5 hours, during which time it turned brown. Glacial acetic acid (0.20 mL) was added, resulting in a brownish solution containing a white precipitate. A solution of 0.40 g Na<sub>2</sub>HPO<sub>4</sub> in 1.45 mL of water was added, causing the suspension to become homogeneous. The organic layer was separated, and the aqueous layer was washed with chloroform three times. The combined organic layers were washed with brine, dried over anhydrous Na<sub>2</sub>SO<sub>4</sub>, the solvent was evaporated under reduced pressure. The resulting crude product was purified by flash chromatography (hexanes: ethyl acetate) to give compound **S14** as inseparable diastereomers as a yellow oil (50.0 mg, 35%).

**HRMS** (ESI-TTOF) *m/z* [M+H]<sup>+</sup> calculated for C<sub>10</sub>H<sub>15</sub>O<sub>5</sub> 215.0919 found 215.0922

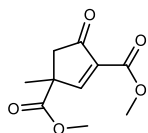

To a solution of compound **S14** (50.0 mg, 0.233 mmol, 1 eq.) in methylene chloride (0.1 mL) at 0°C was added pyridine (23 μL, 0.280 mmol, 1.2 eq.). After 5 min, a solution of phenylselenenyl chloride (53.6 mg, 0.280 mmol, 1.2 eq.) in methylene chloride (0.1 mL) was added dropwise. After 16 hours the reaction mixture was quenched with a saturated aqueous solution of ammonium chloride and washed twice with ethyl acetate. The combined organic layers were washed with water two times and dried over anhydrous Na<sub>2</sub>SO<sub>4</sub>. The solvent was evaporated under reduced pressure affording **S15**.

To a solution of the above prepared **S15** in methylene chloride (1 mL) was added *m*-CPBA (138.1 mg, 0.560 mmol, 2.4 eq.) at 0°C in small amounts. After 16 hours, water was added and the mixture was washed three times with methylene chloride. The organic layers were washed with a 5% NaHCO<sub>3</sub> solution and brine two times, dried over anhydrous Na<sub>2</sub>SO<sub>4</sub>. The solvent was evaporated under reduced pressure. The resulting crude product was purified by flash chromatography (hexanes: ethyl acetate) to give compound **S16** as a yellow oil (26.3 mg, 53%).

**HRMS** (ESI-TTOF) *m/z* [M+H]<sup>+</sup> calculated for C<sub>10</sub>H<sub>13</sub>O<sub>5</sub> 213.0762 found 213.0763

**<sup>1</sup>H NMR** (500 MHz, CDCl<sub>3</sub>): δ 8.20 (s, 1H), 3.82 (s, 3H), 3.73 (s, 3H), 3.11 (d, *J* = 18.9 Hz, 1H), 2.41 (d, *J* = 18.9 Hz, 1H), 1.53 (s, 3H).

**<sup>13</sup>C NMR** (125 MHz, CDCl<sub>3</sub>): δ 200.2, 172.9, 171.9, 161.9, 135.6, 53.2, 52.3, 49.0, 47.2, 24.4;

### Preparation of 1-benzyl 3-methyl 3-methyl-5-oxocyclopent-1-ene-1,3-dicarboxylate (27):

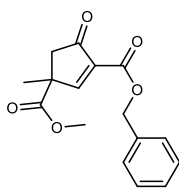

To a solution of compound **S16** (120.0 mg, 0.566 mmol, 1 eq.) in toluene (2.4 mL) was added benzyl-alcohol (588  $\mu$ L, 5.66 mmol, 10 eq.) and the resulting mixture was stirred at 110 °C for 48 hours. After the starting material was fully consumed the volatiles were evaporated under reduced pressure. The crude product was purified by flash chromatography (hexanes: ethyl acetate) to give compound **27** as a yellow oil (72.0 mg, 44%).

**HRMS** (ESI-TTOF)  $m/z$   $[M+H]^+$  calculated for  $C_{16}H_{17}O_5$  289.1075 found 289.1079

**$^1H$  NMR** (500 MHz,  $CDCl_3$ ):  $\delta$  8.20 (s, 1H), 7.43 (m, 2H), 7.40 – 7.31 (m, 3H), 5.28 (d,  $J$  = 2.3 Hz, 2H), 3.74 (s, 3H), 3.14 (d,  $J$  = 18.9 Hz, 1H), 2.42 (d,  $J$  = 18.9 Hz, 1H), 1.54 (s, 3H).

**$^{13}C$  NMR** (125 MHz,  $CDCl_3$ ):  $\delta$  200.1, 172.8, 171.6, 161.1, 135.4, 135.3, 128.6, 128.43, 128.41, 66.8, 53.1, 48.9, 47.0, 24.3;

### Preparation of 3-(methoxycarbonyl)-3-methyl-5-oxocyclopent-1-ene-1-carboxylic acid (S17):

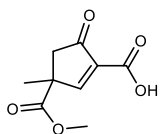

To a solution of compound **27** (450.0 mg, 1.56 mmol, 1 eq.) in methylene chloride (9 mL) was added TFA (1.19 mL, 15.6 mmol, 10 eq.) and 98% sulfuric acid (10 drops, 0.5 mL) and the resulting mixture was stirred at 25°C for 10 minutes. After the starting material was consumed, the reaction mixture was diluted with 150 mL of water and was washed with methylene chloride three times. The combined organic layers were washed two times with brine, dried over anhydrous  $Na_2SO_4$ . The solvent was evaporated under reduced pressure affording compound **S17** as an off-white solid (309.0 mg, 99 %).

**HRMS** (ESI-TTOF)  $m/z$   $[M+Na]^+$  calculated for  $C_9H_{10}O_5Na$  221.0425 found 221.0428

**$^1H$  NMR** (500 MHz,  $CDCl_3$ ):  $\delta$  8.48 (s, 1H), 3.78 (s, 3H), 3.32 (d, 1H), 2.57 (d, 1H), 1.61 (s, 3H).

**$^{13}C$  NMR** (125 MHz,  $CDCl_3$ ):  $\delta$  206.2, 175.0, 172.1, 161.1, 133.1, 53.3, 49.7, 46.4, 24.0;

### General procedure C for the transesterification of compound S18:

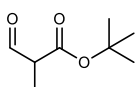

Compound **S18** was synthesized according to literature procedures.<sup>11</sup>



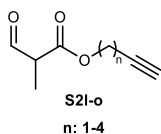

Compound **S18** (1.00 g, 6.321 mmol, 1 eq.) was dissolved in toluene (30 mL) then the appropriate propargyl alcohol derivative (1.5 eq.) was added, and the mixture was heated to 110°C where it was kept for until full conversion was achieved (1-3 hours). The mixture was cooled to room temperature and then concentrated under reduced pressure at 30°C. Compounds **S21-o** were obtained by vacuum distillation as colorless oils.

n: 1; Prop-2-yn-1-yl 2-methyl-3-oxopropanoate: (624.0 mg, 68%) **S2l**

<sup>1</sup>H NMR (500 MHz, CDCl<sub>3</sub>) enol-form: δ 11.04 (d, *J* = 12.8 Hz, 1H), 7.03 (dq, *J* = 12.8, 1.2 Hz, 1H), 4.79 (d, *J* = 2.5 Hz, 2H), 2.50 (t, *J* = 2.5 Hz, 1H), 1.72 (d, *J* = 1.2 Hz, 3H).

<sup>13</sup>C NMR (125 MHz, CDCl<sub>3</sub>) enol form: δ 196.6, 171.5, 99.6, 75.6, 75.1, 51.8, 12.1;

n: 2; But-3-yn-1-yl 2-methyl-3-oxopropanoate: (444.0 mg, 46%) **S2m**

<sup>1</sup>H NMR (500 MHz, CDCl<sub>3</sub>) enol form: δ 11.14 (d, *J* = 12.6 Hz, 1H), 7.01 (dq, *J* = 12.6, 1.2 Hz, 1H), 4.30 (t, *J* = 6.8 Hz, 2H), 2.58 (dtd, *J* = 7.3, 6.8, 2.6 Hz, 2H), 2.01 (td, *J* = 2.7, 1.5 Hz, 1H), 1.70 (d, *J* = 1.2 Hz, 3H).

<sup>13</sup>C NMR (125 MHz, CDCl<sub>3</sub>) enol form: δ 197.0, 160.6, 79.6, 70.3, 63.0, 52.6, 28.1, 12.4;

n: 3; Pent-4-yn-1-yl 2-methyl-3-oxopropanoate: (574.0 mg, 54%) **S2n**

<sup>1</sup>H NMR (300 MHz, CDCl<sub>3</sub>) enol form: δ 11.25 (d, *J* = 12.5 Hz, 1H), 7.00 (dd, *J* = 12.6, 1.2 Hz, 1H), 4.29 (t, *J* = 6.2 Hz, 2H), 2.34 – 2.29 (m, 2H), 1.97 (dt, *J* = 5.0, 2.7 Hz, 1H), 1.95 – 1.88 (m, 2H), 1.68 (d, *J* = 1.2 Hz, 3H).

<sup>13</sup>C NMR (75 MHz, CDCl<sub>3</sub>) enol form: δ 197.3, 162.9, 89.3, 69.6, 61.6, 52.7, 27.2, 21.5, 15.1;

n: 4; Hex-5-yn-1-yl 2-methyl-3-oxopropanoate: (641.0 mg, 56%) **S2o**

<sup>1</sup>H NMR (300 MHz, CDCl<sub>3</sub>) enol form: δ 11.28 (d, *J* = 12.5 Hz, 1H), 7.00 (dq, *J* = 12.5, 1.2 Hz, 1H), 4.22 (t, *J* = 6.41 Hz, 2H), 2.27 – 2.23 (m, 2H), 1.97 – 1.94 (m, 1H), 1.86 – 1.7 (m, 2H), 1.68 (d, *J* = 1.2 Hz, 3H), 1.66-1.59 (m, 2H).

<sup>13</sup>C NMR (75 MHz, CDCl<sub>3</sub>) enol form: δ 197.3, 169.9, 83.7, 69.0, 62.4, 52.7, 31.71, 27.6, 24.9, 18.1;

**Preparation of 1-(*tert*-butyl) 3-(prop-2-yn-1-yl) 3-methyl-6-oxocyclohex-1-ene-1,3-dicarboxylate (28R/28S):**

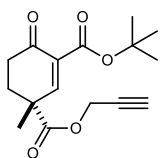

Following the **General Procedure A** using: **S1a** (300.0 mg, 1.76 mmol), **S2l** (271.7 mg, 1.94 mmol) and catalyst **S3a/S3b** (24.14 mg, 0.0353 mmol) in 1,4-dioxane (1.8 mL, 1.0 M) at room temperature for 3 days. After removal of the volatile compounds under reduced

pressure, purification by flash chromatography on silica gel (hexanes 0-25% ethyl acetate) gave the product as a colorless oil (442.7 mg, 86% for **28R**, 433.0 mg, 84% for **28S**).

*ee*: 92% with catalyst **S3a** (**28R**)

*ee*: -87% with catalyst **S3b** (**28S**)

**HRMS** (ESI-TTOF)  $m/z$   $[M+H]^+$  calculated for  $C_{16}H_{21}O_5$  293.1388 found 293.1393

**$^1H$  NMR** (300 MHz,  $CDCl_3$ ):  $\delta$  7.35 (s, 1H), 4.74 (dd,  $J = 5.6, 2.5$  Hz, 2H), 2.58-2.53 (m, 2H), 2.50 (s, 1H), 2.48-2.43 (m, 1H) 2.04-1.96 (m, 1H), 1.52 (s, 9H), 1.50 (s, 3H).

**$^{13}C$  NMR** (75 MHz,  $CDCl_3$ ):  $\delta$  199.5, 172.7, 163.7, 153.3, 133.7, 82.4, 75.6, 53.2, 44.2, 35.3, 32.0, 28.5, 28.2, 24.5;

**Preparation of 3-(but-3-yn-1-yl) 1-(tert-butyl) (S)-3-methyl-6-oxocyclohex-1-ene-1,3-dicarboxylate (29S):**

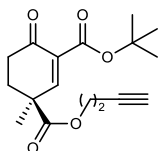

Following the **General Procedure A** using: **S1a** (400.0 mg, 2.35 mmol), **S2m** (400.0 mg, 2.59 mmol) and catalyst **S3b** (24.57 mg, 0.047 mmol) in 1,4-dioxane (2.35 mL, 1.0 M) at room temperature for 3 days. After removal of the volatile compounds under reduced pressure, purification by flash chromatography on silica gel (hexanes 0-25% ethyl acetate) gave the product as a colorless oil (394.0 mg, 55%).

*ee*: -84% with catalyst **S3b**

**HRMS** (ESI-TTOF)  $m/z$   $[M+H]^+$  calculated for  $C_{17}H_{23}O_5$  307.1545 found 307.1545

**$^1H$  NMR** (300 MHz,  $CDCl_3$ ):  $\delta$  7.34 (s, 1H), 4.26 (m, 2H), 2.55 (m, 2H), 2.51 (m, 1H), 2.47 (s, 1H), 2.44 (m, 1H), 1.98 (m, 2H), 1.50 (s, 9H), 1.49 (s, 3H).

**$^{13}C$  NMR** (75 MHz,  $CDCl_3$ ):  $\delta$  193.5, 173.0, 163.6, 153.7, 133.4, 82.1, 79.4, 70.2, 63.0, 44.2, 35.3, 31.9, 28.1, 24.6, 18.9;

**Preparation of 1-(tert-butyl) 3-(pent-4-yn-1-yl) (S)-3-methyl-6-oxocyclohex-1-ene-1,3-dicarboxylate (30S):**

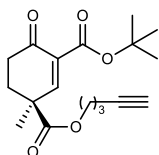

Following the **General Procedure A** using: **S1a** (370.0 mg, 2.17 mmol), **S2n** (402.0 mg, 2.39 mmol) and catalyst **S3b** (22.7 mg, 0.043 mmol) in 1,4-dioxane (2.10 mL, 1.0 M) at room temperature for 3 days. After removal of the volatile compounds under reduced pressure, purification by flash chromatography on silica gel (hexanes 0-25% ethyl acetate) gave the product as a colorless oil (354.0 mg, 51%).

**ee:** -81% with catalyst **S3b**

**HRMS** (ESI-TTOF)  $m/z$   $[M+H]^+$  calculated for  $C_{18}H_{25}O_5$  321.1701 found 321.1702

**$^1H$  NMR** (300 MHz,  $CDCl_3$ ):  $\delta$  7.35 (s, 1H), 4.27 (t,  $J = 6.9$  Hz, 2H), 2.57-2.51 (m, 2H), 2.47-2.43 (m, 1H), 2.29 (td,  $J = 6.9$  Hz, 2.3 Hz, 2H), 2.03-2.00 (m, 1H), 1.99-1.97 (m, 1H), 1.91-1.86 (m, 2H), 1.52 (s, 9H), 1.49 (s, 3H).

**$^{13}C$  NMR** (75 MHz,  $CDCl_3$ ):  $\delta$  193.6, 173.3, 163.7, 153.9, 133.4, 82.6, 82.3, 69.5, 64.3, 44.4, 35.4, 32.1, 28.2, 27.4, 24.7, 15.3;

**Preparation of 1-(tert-butyl) 3-(hex-5-yn-1-yl) (S)-3-methyl-6-oxocyclohex-1-ene-1,3-dicarboxylate (31S):**

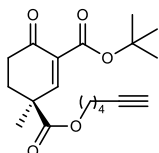

Following the **General Procedure A** using: **S1a** (510.0 mg, 3.00 mmol), **S2o** (600.6 mg, 3.30 mmol) and catalyst **S3b** (31.3 mg, 0.020 mmol) in 1,4-dioxane (3.00 mL, 1.0 M) at room temperature for 3 days. After removal of the volatile compounds under reduced pressure, purification by flash chromatography on silica gel (hexanes 0-25% ethyl acetate) gave the product as a colorless oil (359.0 mg, 36%).

**ee:** -86% with catalyst **S3b**

**HRMS** (ESI-TTOF)  $m/z$   $[M+H]^+$  calculated for  $C_{19}H_{27}O_5$  335.1858 found 335.1864

**$^1H$  NMR** (300 MHz,  $CDCl_3$ ):  $\delta$  7.35 (s, 1H), 4.20-4.16 (m, 2H), 2.54-2.51 (m, 2H), 2.47-2.42 (m, 1H), 2.23 (dt,  $J = 6.6, 3.3$  Hz, 2H), 2.03-1.98 (m, 1H), 1.96 (s, 1H), 1.82 – 1.75 (m, 2H), 1.61-1.56 (m, 2H), 1.51 (s, 9H), 1.48 (s, 3H).

**$^{13}C$  NMR** (75 MHz,  $CDCl_3$ ):  $\delta$  193.7, 173.4, 163.7, 154.1, 133.3, 82.3, 69.1, 63.4, 44.4, 35.5, 32.1, 28.5, 28.2, 27.7, 25.0, 24.7, 18.2;

### Preparation of 4-azido-*N,N*-dimethylaniline (**S19**):

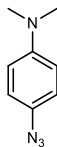

4-azido-*N,N*-dimethylaniline (**S19**) was synthesized according to the literature procedure.<sup>12</sup>

### Preparation of 1-(*tert*-butyl) 3-((1-(4-(dimethylamino)phenyl)-1*H*-1,2,3-triazol-4-yl)methyl) 3-methyl-6-oxocyclohex-1-ene-1,3-dicarboxylate

(**32R/32S**):

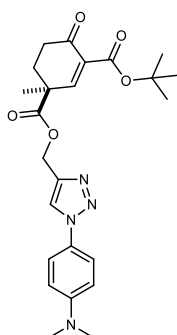

To the solution of **28R/28S** (30.0 mg, 0.103 mmol, 1 eq.) in methylene chloride (0.2 mL) was added compound **S19** (16.2 mg, 0.103 mmol, 1 eq.). To this mixture was added the solution of copper(II) sulfate pentahydrate (2.6 mg, 0.010 mmol, 0.1 eq.) and sodium ascorbate (10.2 mg, 0.051 mmol, 0.5 eq.) in water (0.2 mL) and methanol (0.1 mL). The reaction mixture was vigorously stirred at 25°C. After 3 hours the mixture was diluted with methylene chloride and water then the aqueous phase was washed with methylene chloride two times. The combined organic phases were washed with brine then dried over anhydrous Na<sub>2</sub>SO<sub>4</sub>, filtered, and evaporated under reduced pressure. The crude product was purified by preparative RP-HPLC using a gradient method on a Gemini® 5µm C18 110 Å column (H<sub>2</sub>O:MeCN = 95:5 (0.1 % HCOOH) to 100% MeCN (0.1 % HCOOH)). Compound **32R/32S** was obtained as a yellow solid (36.1 mg, 77% for **32R**, 36.5 mg, 78% for **32S**).

**HRMS** (ESI-TTOF) *m/z* [M+H]<sup>+</sup> calculated for C<sub>24</sub>H<sub>31</sub>N<sub>4</sub>O<sub>5</sub> 455.2294 found 455.2304

**<sup>1</sup>H NMR** (500 MHz, CDCl<sub>3</sub>): δ 7.89 (s, 1H), 7.52 (d, *J* = 9.0 Hz, 2H), 7.34 (s, 1H), 6.75 (d, *J* = 9.1 Hz, 2H), 5.35 (q, *J* = 12.7 Hz, 2H), 3.00 (s, 6H), 2.56 – 2.47 (m, 2H), 2.46 – 2.40 (m, 1H), 2.03 – 1.94 (m, 1H), 1.49 (s, 9H), 1.47 (s, 3H).

**<sup>13</sup>C NMR** (125 MHz, CDCl<sub>3</sub>): δ 193.5, 173.4, 163.7, 153.6, 150.9, 133.6, 126.5, 122.1, 122.0, 112.4, 82.3, 59.0, 44.3, 40.5, 35.3, 32.0, 28.2, 28.1, 24.5, 24.4;

## Preparation of 6-(3-azidophenyl)-5,8-dimethyl-1,2,3,4-tetrahydroisoquinoline (S23):

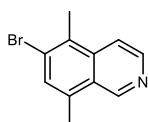

Compound **S20** was synthesized according to the literature procedures.<sup>13</sup>

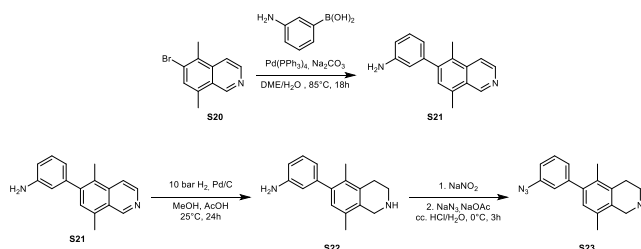

A pressure vessel was charged with compound **S20** (0.750 g, 3.19 mmol 1 eq.), (3-aminophenyl) boronic acid (0.655 g, 4.78 mmol, 1.5 eq.), Na<sub>2</sub>CO<sub>3</sub> (0.676 g, 6.38 mmol, 2 eq.), Pd(PPh<sub>3</sub>)<sub>4</sub> (0.220 g, 0.19 mmol, 0.059 eq.), 9.6 mL dimethoxyethane and 4.8 mL water and the reaction mixture was stirred at 85°C for 18 hours under a N<sub>2</sub> atmosphere. After completion the reaction mixture was cooled to 25°C and water and ethyl acetate was added to it. After phase separation the aqueous phase was extracted 3 times with ethyl acetate. The combined organic phase was washed with water and brine, then it was dried over anhydrous Na<sub>2</sub>SO<sub>4</sub>, filtered and the solvent was evaporated under reduced pressure. The crude product was purified by flash column chromatography giving compound **S21** as brownish crystals (0.680 g, 86%).

**HRMS** (ESI-TTOF) *m/z* [M+H]<sup>+</sup> calculated for C<sub>17</sub>H<sub>17</sub>N<sub>2</sub> 249.1391 found 249.1394

**<sup>1</sup>H NMR** (500 MHz, CDCl<sub>3</sub>): δ 9.52 (s, 1H), 8.58 (d, *J* = 7.5 Hz, 1H), 7.75 – 7.72 (m, 1H), 7.40 (s, 1H), 7.21 (td, *J* = 7.7, 1.9 Hz, 1H), 6.72 – 6.67 (m, 2H), 6.65 – 6.63 (m, 1H), 2.64 (s, 3H), 2.61 (s, 3H).

**<sup>13</sup>C NMR** (125 MHz, CDCl<sub>3</sub>): δ 150.2, 146.4, 142.9, 142.6, 140.5, 135.2, 133.2, 130.9, 129.7, 129.3, 128.3, 120.2, 117.3, 116.2, 114.0, 18.4, 15.4;

A pressure vessel was charged with a solution of compound **S21** (0.400 g, 1.61 mmol, 1 eq.) in 8 mL methanol and 94 μL 98% acetic acid. The atmosphere was changed to N<sub>2</sub> then palladium on carbon was added (0.171 g, 0.161 mmol, 0.1 eq.) and vessel was charged with 10 bar H<sub>2</sub> and the reaction mixture was stirred at 25°C for 24 hours. After completion the reaction mixture was filtered on a pad of Celite then evaporated. The crude mixture was dissolved in methylene chloride then washed 2 times with a 10% NaOH solution. The organic phase was washed with water and brine, then it was dried over anhydrous Na<sub>2</sub>SO<sub>4</sub>, filtered and the solvent was evaporated under reduced pressure giving compound **S22** as an orange oil (0.230g, 56%).

**HRMS** (ESI-TTOF) *m/z* [M+H]<sup>+</sup> calculated for C<sub>17</sub>H<sub>21</sub>N<sub>2</sub> 253.1704 found 253.1708

**<sup>1</sup>H NMR** (500 MHz, CDCl<sub>3</sub>): δ 7.17 (t, *J* = 7.7 Hz, 1H), 6.96 (s, 1H), 6.67 – 6.67 (m, 2H), 6.59 (s, 1H), 4.00 (s, 2H), 3.19 (t, *J* = 6.1 Hz, 2H), 2.72 (t, *J* = 6.1 Hz, 2H), 2.22 (s, 3H), 2.06 (s, 3H).

**<sup>13</sup>C NMR** (125 MHz, CDCl<sub>3</sub>): δ 146.2, 143.5, 140.1, 133.7, 132.0, 129.4, 129.1, 129.0, 120.1, 116.4, 113.5, 46.8, 43.1, 29.8, 26.9, 19.0, 15.4;

A solution of compound **S22** (0.320 g, 1.26 mmol, 1 eq.) in 6 mL conc. HCl was cooled to 0°C, then a solution of NaNO<sub>2</sub> (0.200 g, 2.9 mmol, 2.3 eq.) in 6 mL water was added dropwise, and the reaction mixture was stirred for 2 hours at 0°C. After this, a solution of NaN<sub>3</sub> (0.188g, 2.9 mmol, 2.3 eq.) and NaOAc (2.62g, 3.19 mmol, 2.5 eq.) in 6 mL water was added dropwise, and the reaction mixture was stirred for a further 1 hour at 0°C. The pH was set to 7 with an aqueous NaHCO<sub>3</sub> solution, and the aqueous phase was extracted 3 times with chloroform. The combined organic phase was washed with water and brine, then it was dried over anhydrous Na<sub>2</sub>SO<sub>4</sub>, filtered, and the solvent was evaporated under reduced pressure, giving compound **S23** as a white solid without further purification (0.110 g, 67%).

**HRMS** (ESI-TTOF) *m/z* [M+H]<sup>+</sup> calculated for C<sub>17</sub>H<sub>19</sub>N<sub>4</sub> 279.1609 found 279.1611

**<sup>1</sup>H NMR** (500 MHz, CDCl<sub>3</sub>): δ 7.37 (t, *J* = 7.8 Hz, 1H), 7.05 (dt, *J* = 7.7, 1.3 Hz, 1H), 6.99 (ddd, *J* = 8.0, 2.4, 1.0 Hz, 1H), 6.94 (t, *J* = 2.0 Hz, 1H), 6.93 (s, 1H), 3.98 (s, 2H), 3.18 (t, *J* = 6.0 Hz, 2H), 2.71 (t, *J* = 6.0 Hz, 2H), 2.23 (s, 3H), 2.04 (s, 3H).

**<sup>13</sup>C NMR** (125 MHz, CDCl<sub>3</sub>): δ 144.4, 139.9, 138.6, 134.9, 134.0, 133.1, 129.5, 129.3, 128.8, 126.4, 120.2, 117.4, 47.4, 43.5, 27.5, 19.0, 15.4;

**Preparation of 1-(*tert*-butyl 3-((1-(3-(5,8-dimethyl-1,2,3,4-tetrahydroisoquinolin-6-yl)phenyl)-1H-1,2,3-triazol-4-yl)methyl) (S)-3-methyl-6-oxocyclohex-1-ene-1,3-dicarboxylate (33S):**

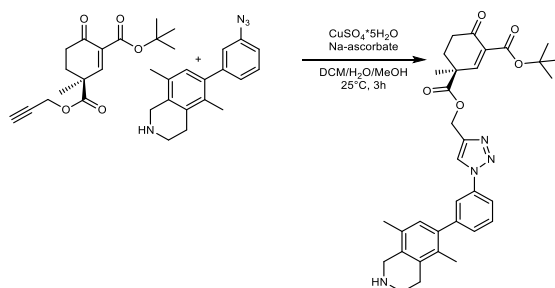

To the solution of **28S** (100.0 mg, 0.340 mmol, 1 eq.) in *tert* butyl alcohol (1.0 mL) was added compound **S23** (95.0 mg, 0.340 mmol, 1 eq.). To this mixture was added the solution of copper(II) sulfate pentahydrate (16.0 mg, 0.068 mmol, 0.2 eq.) and sodium ascorbate (33.0 mg, 0.170 mmol, 0.5 eq.) in water (1.0 mL). The reaction mixture was vigorously stirred at 25°C. After 3 days the mixture was diluted with methylene chloride and water then the aqueous phase was washed with methylene chloride two times. The combined organic phases were washed with brine then dried over anhydrous Na<sub>2</sub>SO<sub>4</sub>, filtered, and evaporated under reduced pressure. Compound **33S** was obtained as a green oil and was used without further purification (160.0 mg, 83%).

**HRMS** (ESI-TTOF) *m/z* [M+H]<sup>+</sup> calculated for C<sub>33</sub>H<sub>39</sub>N<sub>4</sub>O<sub>5</sub> 571.2920 found 571.2925

**<sup>1</sup>H NMR** (500 MHz, CDCl<sub>3</sub>): δ 8.05 (s, 1H), 7.72 – 7.71 (m, 1H), 7.65 (t, *J* = 2.0 Hz, 1H), 7.55 (t, *J* = 7.8 Hz, 1H), 7.37 (d, *J* = 7.6 Hz, 1H), 7.34 (s, 1H), 6.98 (s, 1H), 5.38 (q, *J* = 12.8 Hz, 2H), 3.78 – 3.67 (m, 1H), 2.88 – 2.66 (m, 2H), 2.54 – 2.49 (m, 3H), 2.48 – 2.43 (m, 2H), 2.25 (s, 3H), 2.07 (s, 3H), 2.04 – 1.98 (m, 2H), 1.49 (s, 9H), 1.48 (s, 3H).

<sup>13</sup>C NMR (125 MHz, CDCl<sub>3</sub>) partial: δ 193.5, 173.5, 163.8, 153.4, 144.6, 143.1, 136.8, 134.3, 133.8, 131.0, 130.4, 129.6, 128.9, 122.1, 121.7, 118.9, 82.4, 58.9, 44.3, 35.3, 32.0, 29.9, 28.2, 28.1, 24.6, 22.8, 19.0, 15.5;

**Preparation of 1-(*tert*-butyl) 3-(3-(4-(dimethylamino)phenyl)prop-2-yn-1-yl) 3-methyl-6-oxocyclohex-1-ene-1,3-dicarboxylate (34R/34S):**

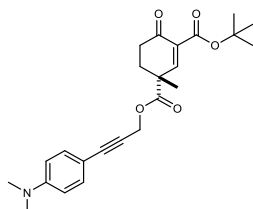

Into a flame-dried vial under a nitrogen atmosphere was added Pd(PPh<sub>3</sub>)<sub>2</sub>Cl<sub>2</sub> (14.4 mg, 0.020 mmol, 0.06 eq.) and CuI (7.2 mg, 0.038 mmol, 0.11 eq.). To this vial was added a solution of compound **28R/28S** (100.0 mg, 0.171 mmol, 1 eq.) and 4-iodo-*N,N*-dimethylaniline (84.5 mg, 0.342 mmol, 1 eq.) in anhydrous tetrahydrofuran (1.0 mL) and diisopropylamine (1.0 mL). The reaction mixture was stirred at 25°C for 1 hour and when the starting material was consumed it was filtered through a pad of Celite then evaporated. The residue was purified by flash column chromatography on silica gel using hexane: ethyl acetate = 1:1 as eluent to afford **34R/34S** as yellow oils (26.9 mg, 19% for **34R**, 40.2 mg, 29% for **34S**).

**HRMS** (ESI-TTOF) *m/z* [M+H]<sup>+</sup> calculated for C<sub>24</sub>H<sub>30</sub>NO<sub>5</sub> 412.2123 found 412.2137

<sup>1</sup>H NMR (500 MHz, CDCl<sub>3</sub>): δ 7.40 (s, 1H), 7.32 (d, *J* = 8.9 Hz, 2H), 6.61 (d, *J* = 8.9 Hz, 2H), 4.97 (q, *J* = 15.4 Hz, 2H), 2.98 (s, 6H), 2.63 – 2.56 (m, 1H), 2.55 – 2.46 (m, 2H), 2.03 – 1.99 (m, 1H), 1.54 (s, 3H), 1.52 (s, 9H).

<sup>13</sup>C NMR (125 MHz, CDCl<sub>3</sub>): δ 193.6, 172.9, 163.7, 153.7, 150.6, 133.2, 130.3, 111.8, 108.6, 88.5, 82.3, 80.2, 54.6, 44.3, 40.2, 35.4, 32.0, 28.2, 24.5;

**Preparation of 1-(*tert*-butyl) 3-(3-(pyridin-4-yl)prop-2-yn-1-yl) 3-methyl-6-oxocyclohex-1-ene-1,3-dicarboxylate (35R/35S):**

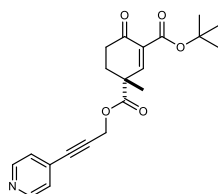

Into a flame-dried vial under a nitrogen atmosphere was added Pd(PPh<sub>3</sub>)<sub>2</sub>Cl<sub>2</sub> (7.2 mg, 0.010 mmol, 0.06 eq.) and CuI (3.6 mg, 0.019 mmol, 0.11 eq.). To this vial was added a solution of compound **28R/28S** (50.0 mg, 0.171 mmol, 1 eq.) and 4-iodopyridine (35.1 mg, 0.171 mmol, 1 eq.) in anhydrous tetrahydrofuran (0.375 mL) and diisopropylamine (0.375 mL). The reaction mixture was stirred at 25°C for 4 hours and when the starting material was consumed it was filtered through a pad of Celite then evaporated. The residue was purified by flash column chromatography on silica gel using hexane: ethyl acetate = 1:1 as eluent to afford **35R/35S** as yellow oils (24.9 mg, 40% for **35R**, 39.1 mg, 62% for **35S**).

**HRMS** (ESI-TTOF) *m/z* [M+H]<sup>+</sup> calculated for C<sub>21</sub>H<sub>24</sub>NO<sub>5</sub> 370.1654 found 370.1660

**<sup>1</sup>H NMR** (500 MHz, CDCl<sub>3</sub>): δ 8.60 (s, 2H), 7.37 (s, 1H), 7.30 (d, *J* = 5.0 Hz, 2H), 5.03 – 4.95 (m, 2H), 2.63 – 2.48 (m, 3H), 2.07 – 1.95 (m, 1H), 1.54 (s, 3H), 1.52 (s, 9H).

**<sup>13</sup>C NMR** (125 MHz, CDCl<sub>3</sub>): δ 210.0, 193.3, 172.6, 154.2, 153.0, 149.9, 133.8, 86.9, 84.4, 82.3, 53.5, 44.2, 35.2, 31.9, 28.1, 24.5;

### Preparation of unnatural amino acids (36-38):

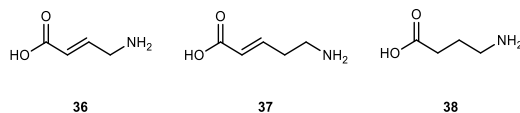

Compounds **36**, **37**, **38** were synthesized according to literature procedures<sup>14-18</sup> as fluorenylmethoxycarbonyl (Fmoc) protected amino acids and unnatural peptides were chemically synthesized using solid phase peptide synthesis (on Rink Amid resin, PS3 peptide synthesizer, Protein Technologies) with Fmoc/<sup>t</sup>Bu strategy and purified by RP-HPLC using a Jupiter 300 Å C18 column (Phenomenex). The quality of the peptides was verified by HPLC-MS (Shimadzu LCMS-2020).

### Preparation of azido pepMNK1 (S24):

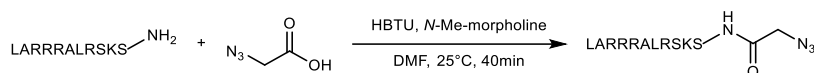

Azidoacetic acid was synthesized according to literature procedure.<sup>19</sup>

The peptide was chemically synthesized using solid phase peptide synthesis (on Rink Amid resin, PS3 peptide synthesizer, Protein Technologies) with Fmoc/<sup>t</sup>Bu strategy and purified by RP-HPLC using a Jupiter 300 Å C18 column (Phenomenex). The quality of the peptide was verified by HPLC-MS (Shimadzu LCMS-2020).

**HRMS** (ESI-TTOF) *m/z* [M+H]<sup>+</sup> calculated for C<sub>56</sub>H<sub>106</sub>N<sub>27</sub>O<sub>15</sub> 1396.8356 found 1396.8422

### Preparation of 28S-pepMNK1\_C:

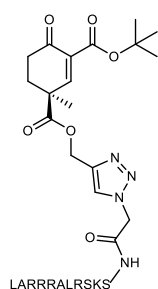

To the solution of **28S** (20.0 mg, 0.068 mmol, 1 eq.) in *tert*-butyl alcohol (0.15 mL) was added **S24** (96.0 mg, 0.068 mmol, 1 eq.). To this mixture was added the solution of copper(II) sulfate pentahydrate (17.0 mg, 0.068 mmol, 1 eq.) and sodium ascorbate (14.0 mg, 0.068 mmol, 1 eq.) in water (0.1 mL). The reaction mixture was vigorously stirred at 25°C. After 3 days the mixture was diluted with water then filtered using a syringe filter and the target compound was purified by a semi-preparative HPLC giving the title compound as white solid.

**HRMS** (ESI-TTOF) *m/z* [M+H]<sup>+</sup> calculated for C<sub>72</sub>H<sub>126</sub>N<sub>27</sub>O<sub>20</sub> 1688.9666 found 1688.9762



### Preparation of 28S-pepMNK1\_K\_CF:

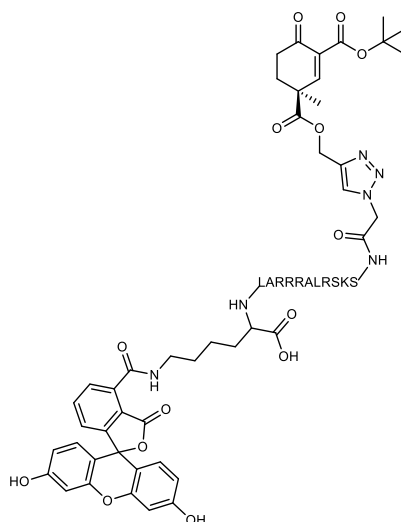

The azide group containing peptide was chemically synthesized using solid-phase peptide synthesis (on Rink Amide resin (low loading 0.2 mmol/g), PS3 peptide synthesizer, Protein Technologies) with the Fmoc/<sup>t</sup>Bu strategy. The C-terminal lysine side chain protecting group, 1-(4,4-dimethyl-2,6-dioxocyclohex-1-ylidene)ethyl (Dde), was removed using 2% hydrazine in *N,N*-dimethylformamide. 5(6)-Carboxyfluorescein was coupled to the side chain of the lysine on the resin using a PS3 peptide synthesizer. The peptide cleavage was carried out by a TFA/H<sub>2</sub>O/Tris (95/2.5/2.5) mixture and the peptide was purified by RP-HPLC using a Jupiter 300 Å C18 column (Phenomenex). The quality of the peptide was verified by HPLC-MS (Shimadzu LCMS-2020). Then, the solution of 28S (3.6 mg, 0.012 mmol, 1 eq.) in tert-butyl alcohol (0.15 mL) was added to azido-pepMNK1\_K-CF (23.0 mg, 0.012 mmol, 1 eq.). To this mixture was added the solution of copper(II) sulfate pentahydrate (3.0 mg, 0.012 mmol, 1 eq.) and sodium ascorbate (2.5 mg, 0.012 mmol, 1 eq.) in water (0.1 mL). The reaction mixture was vigorously stirred at 25°C. After 3 days, the mixture was diluted with water, then filtered using a syringe filter, and the target compound was purified by semi-preparative HPLC, yielding the title compound as a yellow solid.

### Preparation of tert-butyl (E)-2-cyano-4,4-dimethylpent-2-enoate (**40**):

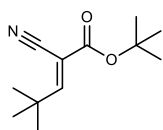

A mixture of pivaldehyde (1.22 g, 14.2 mmol), tert-butyl cyanoacetate (1.00 g, 7.1 mmol), acetic acid (0.406 mL, 7.1 mmol) and pyridine (0.573 mL, 7.1 mmol) was heated at reflux for 1 h. A second portion of pivaldehyde (1.22 g, 14.2 mmol) was added. The refluxing of the mixture was continued for 18 h. After cooling, the mixture was poured into 1N aqueous HCl (50 mL). The resulting mixture was extracted with EtOAc (3\*50 mL). The combined organic layers were washed with 1N aqueous HCl, dried over anhydrous Na<sub>2</sub>SO<sub>4</sub> and concentrated to give a colorless oil. The oil was purified by flash chromatography on SiO<sub>2</sub> using hexane-EtOAc (9:1) as the eluent to give compound **40** as a colorless oil (1.00 g, 68% yield).

**HRMS** (ESI-TTOF) *m/z* [M+H]<sup>+</sup> calculated for C<sub>12</sub>H<sub>20</sub>NO<sub>2</sub> 210.1494 found 210.1499

**<sup>1</sup>H NMR** (500 MHz, CDCl<sub>3</sub>): δ 7.54 (s, 1H), 1.54 (s, 9H), 1.30 (s, 9H).

**<sup>13</sup>C NMR** (125 MHz, CDCl<sub>3</sub>): δ 170.5, 161.0, 114.4, 107.3, 83.5, 34.8, 28.9, 27.9;

### Preparation of methyl acetyl-L-histidinate (**S25**):

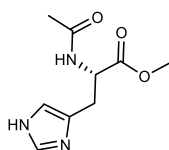

Compound **S25** was prepared according to the literature procedures.<sup>20</sup>

### Preparation of 3-(tert-butyl) 1-methyl (1R)-1-methyl-4-oxocyclohexane-1,3-dicarboxylate (**3''R**):

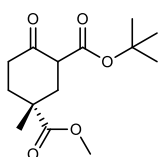

To the solution of compound **3R** (100.0 mg, 0.373 mmol, 1 eq.) in anhydrous pyridine (0.573 mL) was added NaBH<sub>4</sub> (14.1 mg, 0.373 mmol, 1 eq.) at 0°C. The reaction mixture was stirred at 0°C for 15 minutes. 10 mL of saturated NH<sub>4</sub>Cl solution was added to the reaction mixture and it was stirred for 5 minutes. The aqueous phase was washed with diethyl ether three times. The combined organic phases were washed with brine two times then dried over anhydrous Na<sub>2</sub>SO<sub>4</sub>, filtered, and evaporated under reduced pressure. Purification by flash chromatography on silica gel (hexanes 0-25% ethyl acetate) gave compound **3''R** as a colorless oil (49.0 mg, 49%).

**HRMS** (ESI-TTOF) *m/z* [M+Na]<sup>+</sup> calculated for C<sub>14</sub>H<sub>22</sub>O<sub>5</sub>Na 293.1364 found 293.1372

**<sup>1</sup>H NMR** (500 MHz, CDCl<sub>3</sub>): δ 12.36 (s, 1H), 3.69 (s, 3H), 2.72 (dd, *J* = 16.1, 1.4 Hz, 1H), 2.41 – 2.22 (m, 2H), 2.13 – 1.99 (m, 2H), 1.65 – 1.58 (m, 1H), 1.51 (s, 9H), 1.24 (s, 3H).

$^{13}\text{C}$  NMR (125 MHz,  $\text{CDCl}_3$ ):  $\delta$  177.4, 172.4, 170.0, 97.1, 81.3, 52.1, 41.4, 32.2, 30.6, 28.4, 26.6, 24.4;

**Preparation of 3-(*tert*-butyl) 1-methyl (1*S*,5*R*)-6-methylene-4-oxobicyclo[3.2.1]octane-1,3-dicarboxylate (6''*R,R*):**

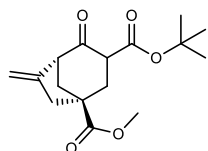

To the solution of compound **6*R,R*** (50.0 mg, 0.171 mmol, 1 eq.) in anhydrous pyridine (0.263 mL) was added  $\text{NaBH}_4$  (6.5 mg, 0.171 mmol, 1 eq.) at  $0^\circ\text{C}$ . The reaction mixture was stirred at  $0^\circ\text{C}$  for 15 minutes. 5 mL of saturated  $\text{NH}_4\text{Cl}$  solution was added to the reaction mixture and it was stirred for 5 minutes. The aqueous phase was washed with diethyl ether three times. The combined organic phases were washed with brine two times then dried over anhydrous  $\text{Na}_2\text{SO}_4$ , filtered, and evaporated under reduced pressure. Purification by flash chromatography on silica gel (hexanes 0-25% ethyl acetate) gave compound **6''*R,R*** as a colorless oil (10.6 mg, 21%).

**HRMS** (ESI-TTOF)  $m/z$   $[\text{M}+\text{Na}]^+$  calculated for  $\text{C}_{16}\text{H}_{22}\text{O}_5\text{Na}$  317.1364 found 317.1375

$^1\text{H}$  NMR (500 MHz,  $\text{CDCl}_3$ ):  $\delta$  12.17 (s, 1H), 5.05 (t,  $J = 2.4$  Hz, 1H), 4.76 (t,  $J = 2.2$  Hz, 1H), 3.73 (s, 3H), 3.06 (d,  $J = 4.3$  Hz, 1H), 2.79 (dt,  $J = 17.1, 2.2$  Hz, 1H), 2.68 (dd,  $J = 15.9, 1.8$  Hz, 1H), 2.48 – 2.43 (m, 1H), 2.35 (dd,  $J = 15.9, 1.5$  Hz, 1H), 2.08 (ddd,  $J = 11.1, 4.4, 1.5$  Hz, 1H), 1.92 (dd,  $J = 11.1, 2.0$  Hz, 1H), 1.49 (s, 9H).

$^{13}\text{C}$  NMR (125 MHz,  $\text{CDCl}_3$ ):  $\delta$  202.9, 176.4, 173.5, 150.6, 106.0, 81.4, 59.0, 52.2, 48.6, 48.4, 41.0, 36.8, 34.4, 28.4;

# NMR Spectra

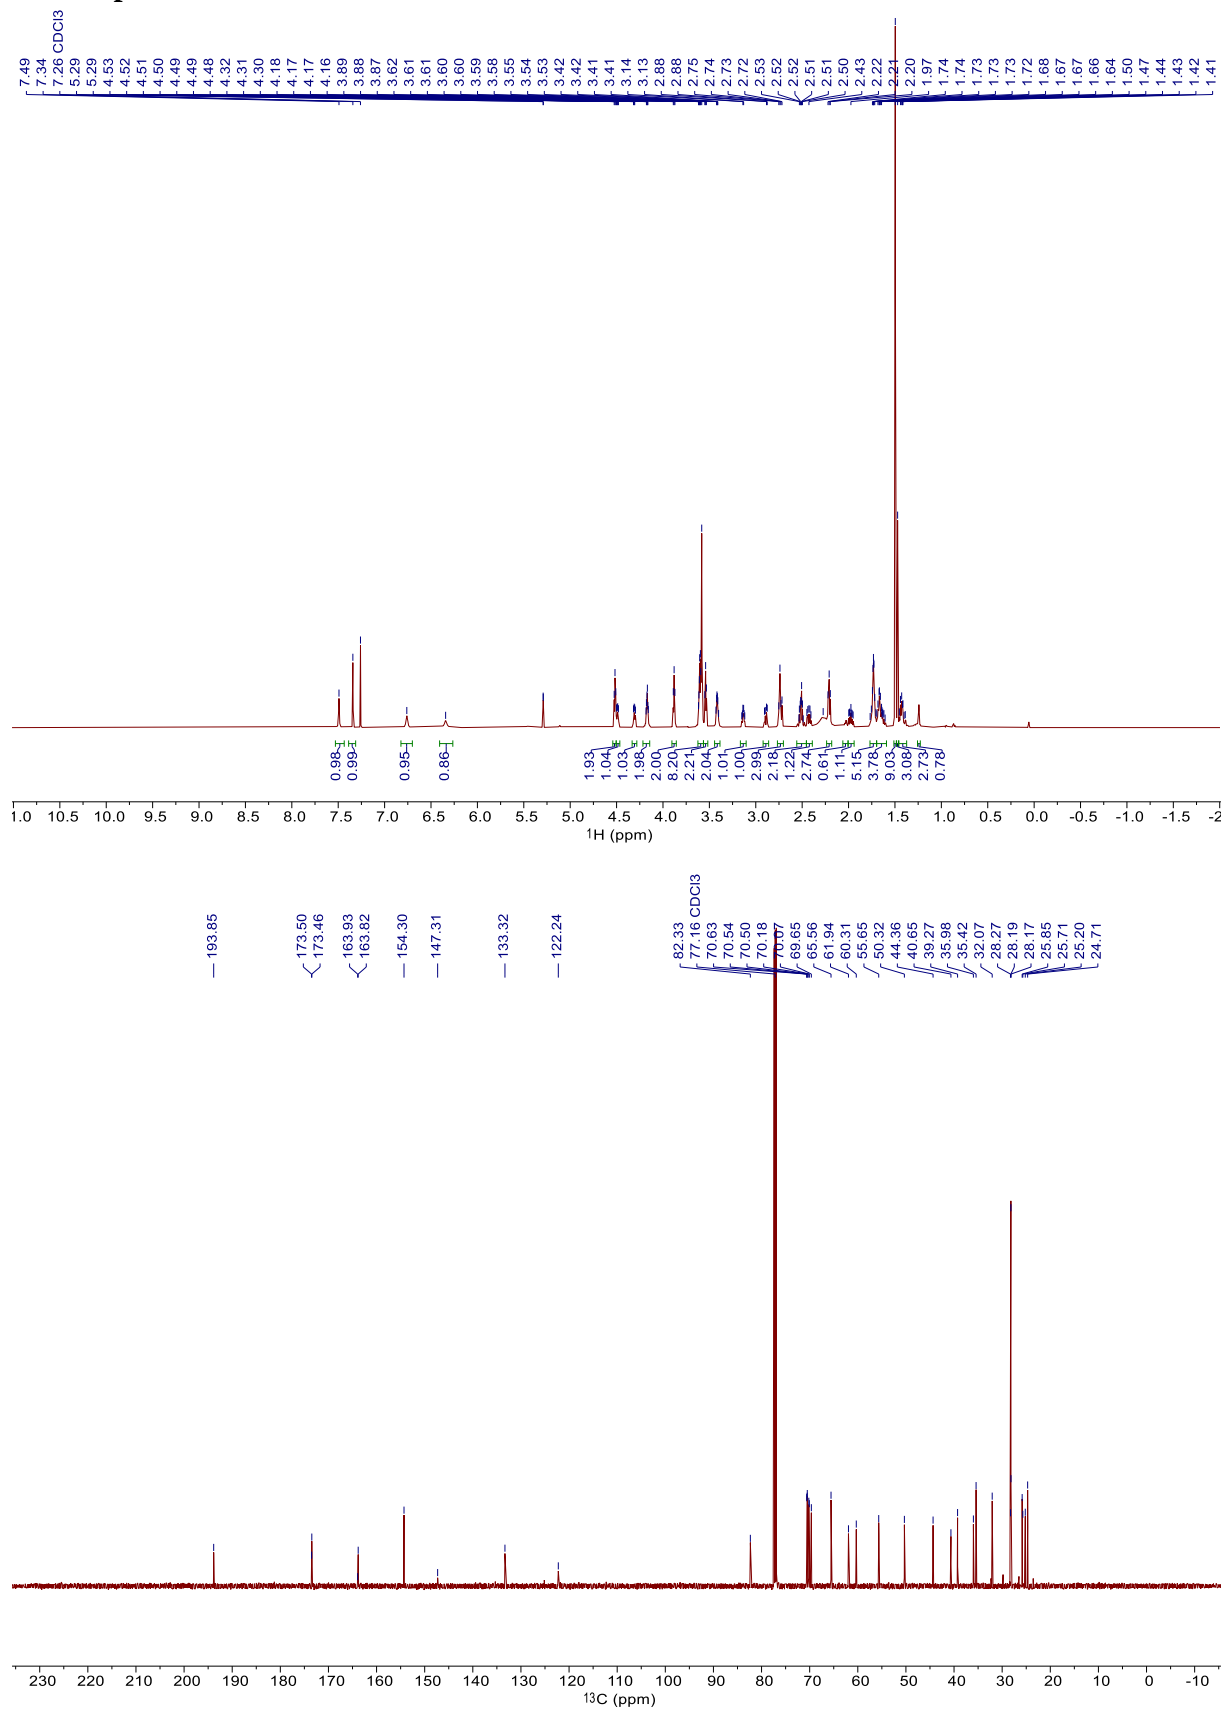

**Supplementary Fig. 29.** The <sup>1</sup>H-NMR (600 MHz) and <sup>13</sup>C-NMR (151 MHz) spectra of compound **2-biotin** in CDCl<sub>3</sub>

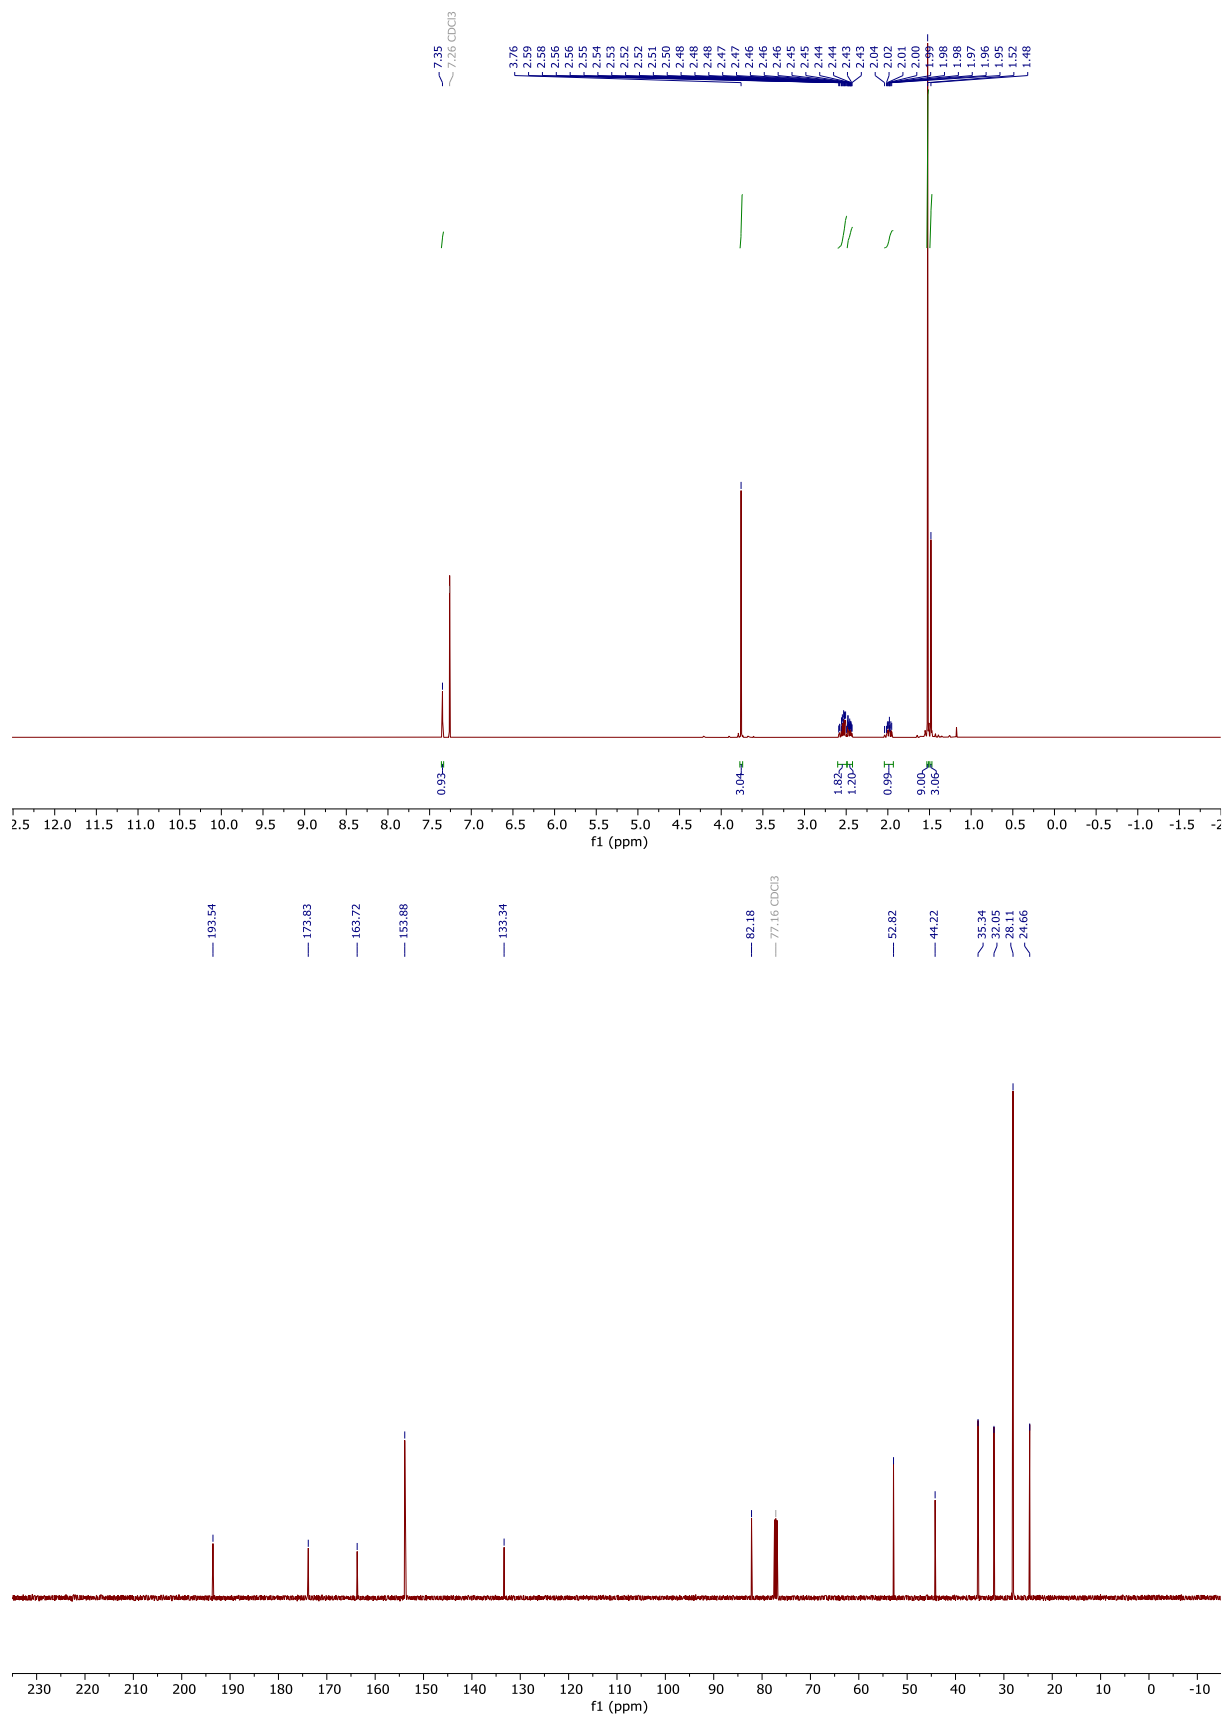

**Supplementary Fig. 30.** The <sup>1</sup>H-NMR (500 MHz) and <sup>13</sup>C-NMR (125 MHz) spectra of compound 3, 3R/3S in CDCl<sub>3</sub>

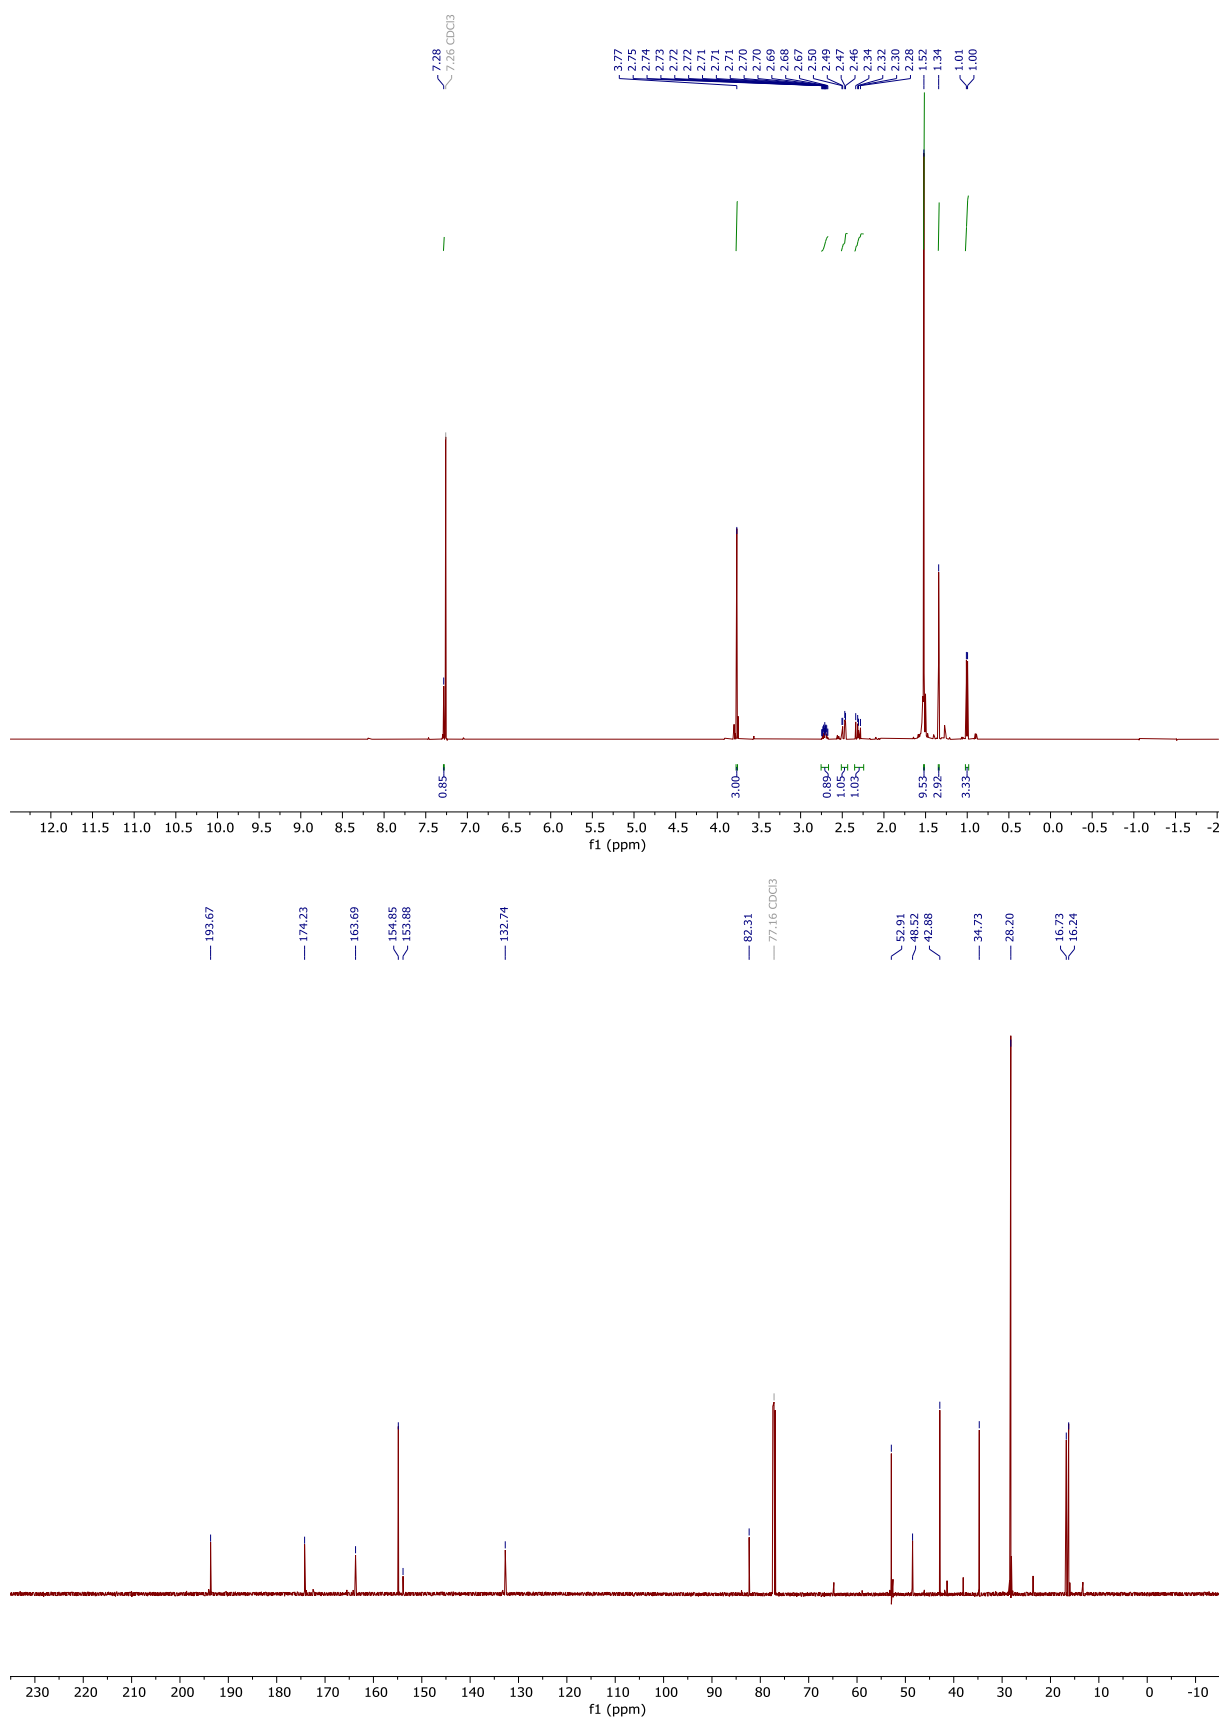

**Supplementary Fig. 31.** The <sup>1</sup>H-NMR (500 MHz) and <sup>13</sup>C-NMR (125 MHz) spectra of compound **3'R** in CDCl<sub>3</sub>

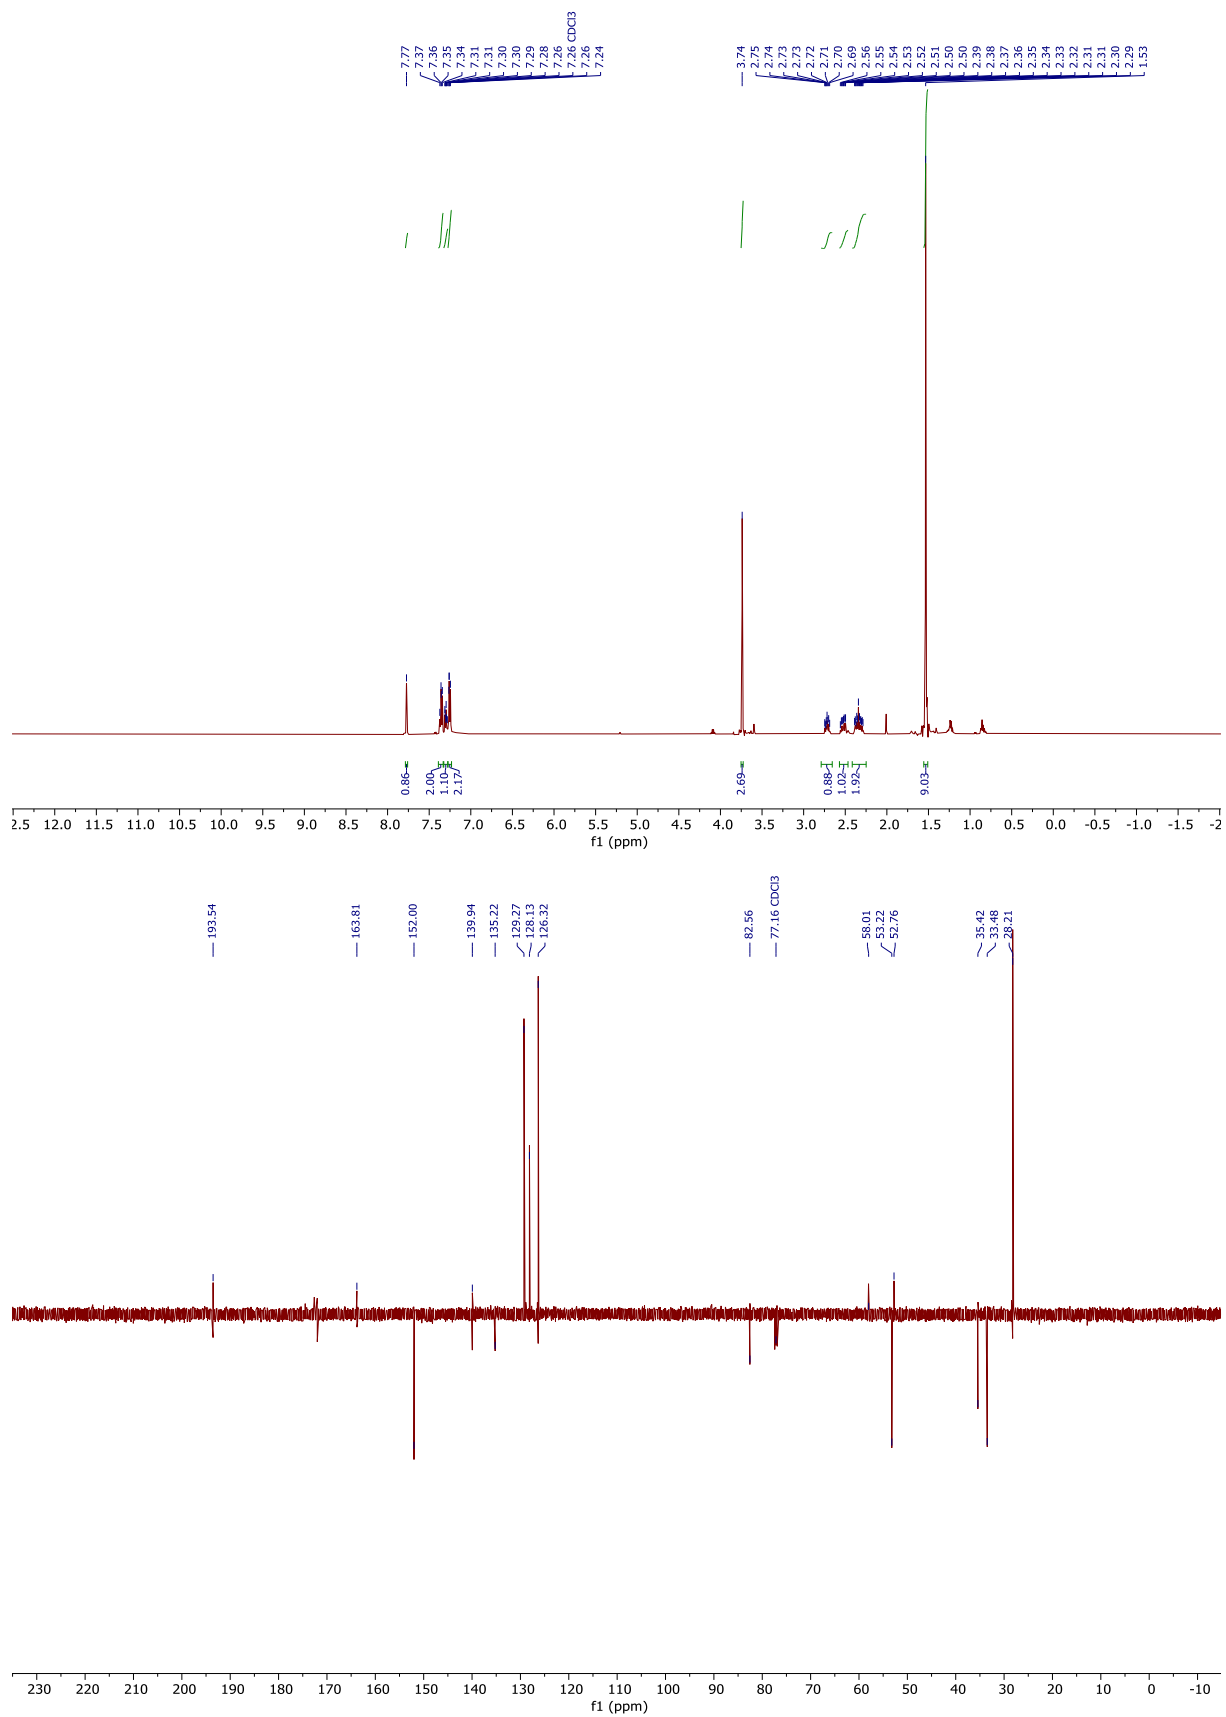

**Supplementary Fig. 32.** The <sup>1</sup>H-NMR (500 MHz) and APT-NMR (125 MHz) spectra of compound 5 in CDCl<sub>3</sub>

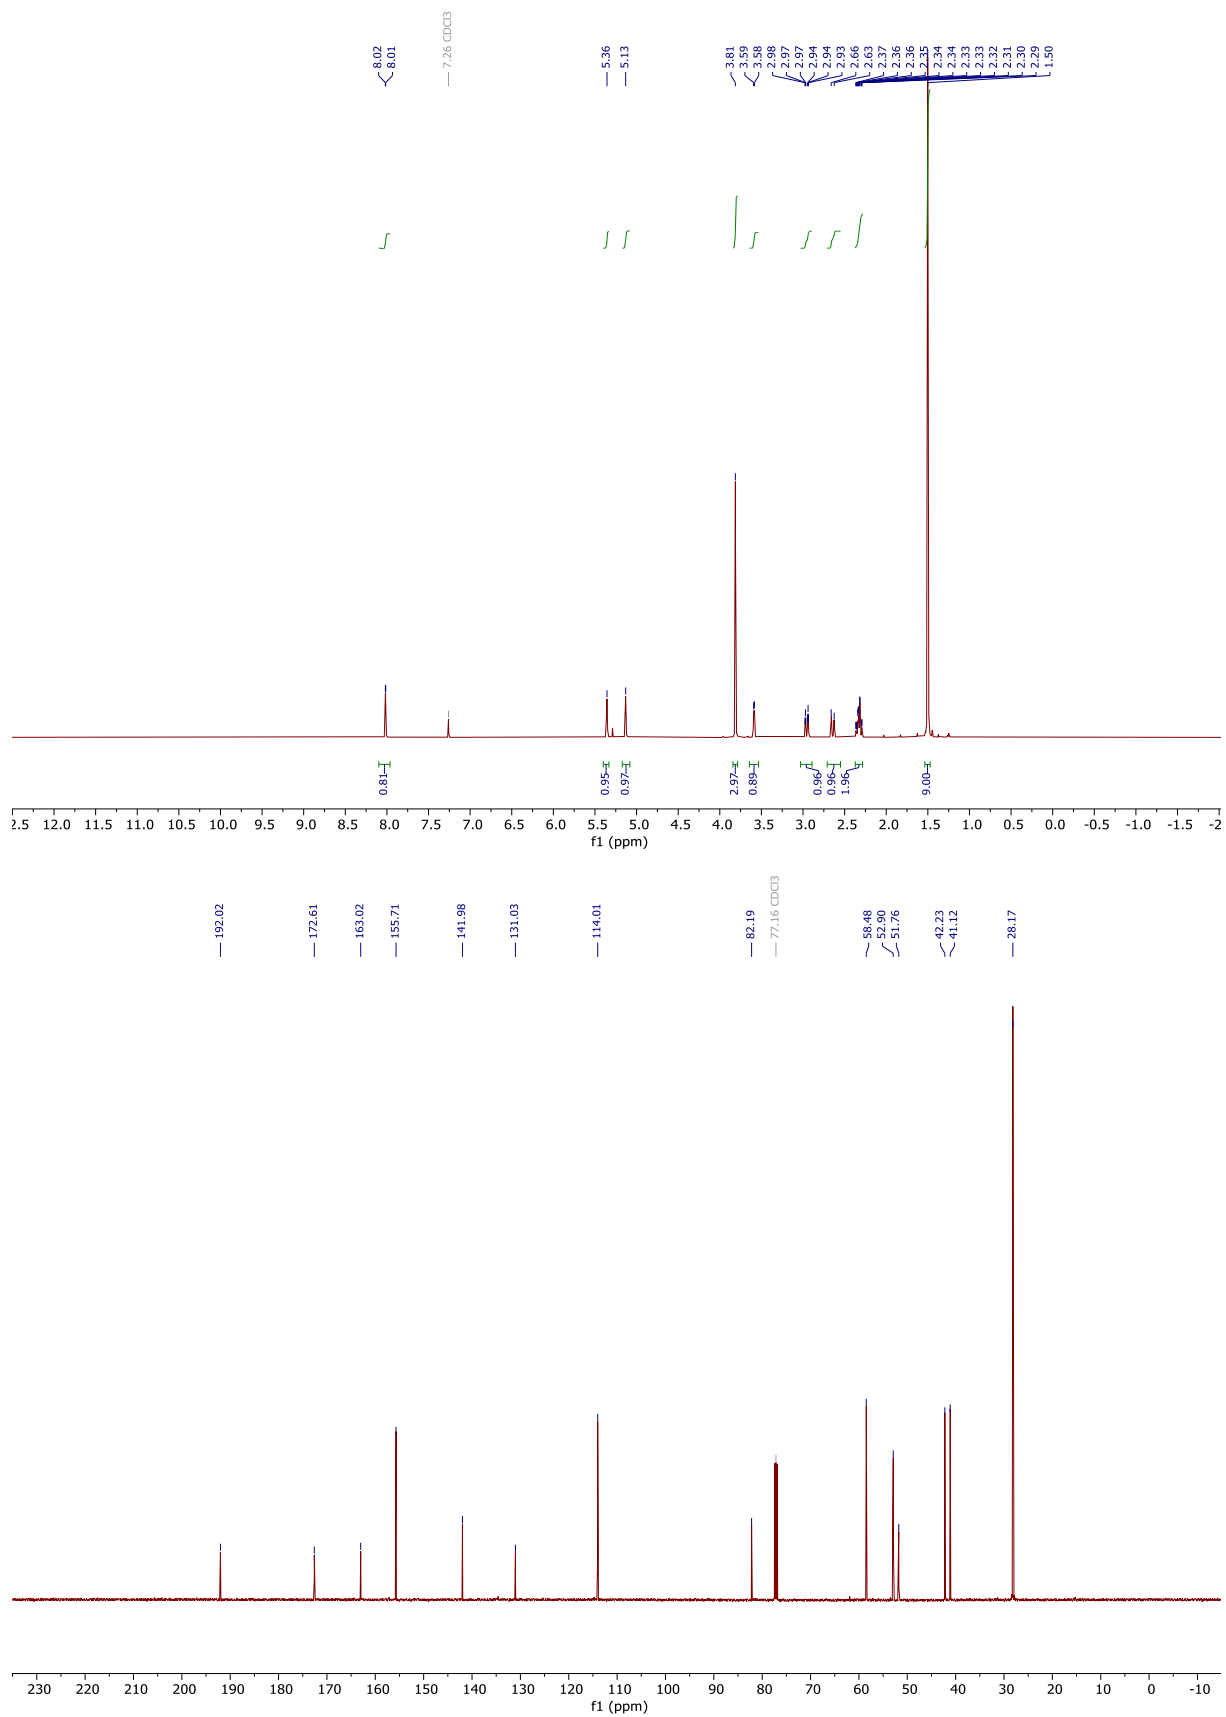

**Supplementary Fig. 33.** The <sup>1</sup>H-NMR (500 MHz) and <sup>13</sup>C-NMR (125 MHz) spectra of compound 6, 6R,R/6S,S in CDCl<sub>3</sub>



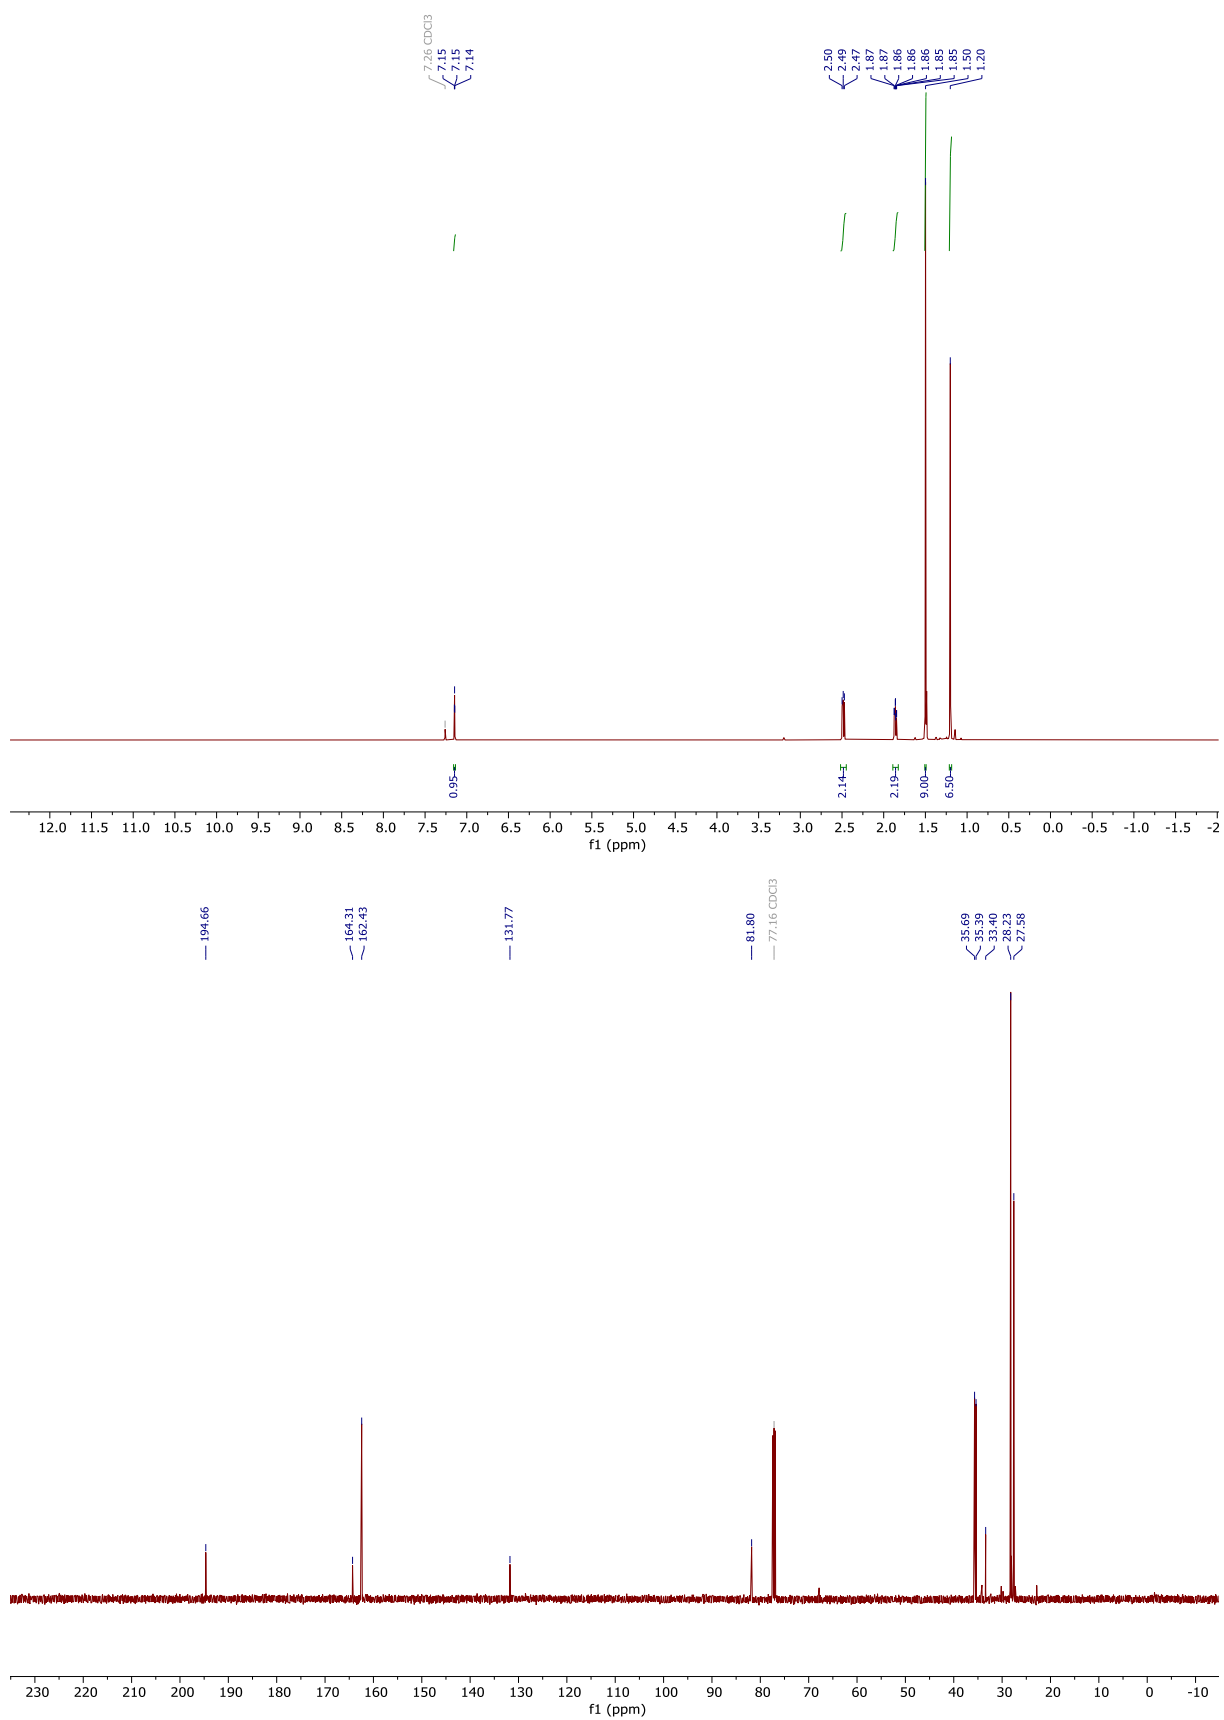

**Supplementary Fig. 34.** The <sup>1</sup>H-NMR (500 MHz) and <sup>13</sup>C-NMR (125 MHz) spectra of compound 7 in CDCl<sub>3</sub>

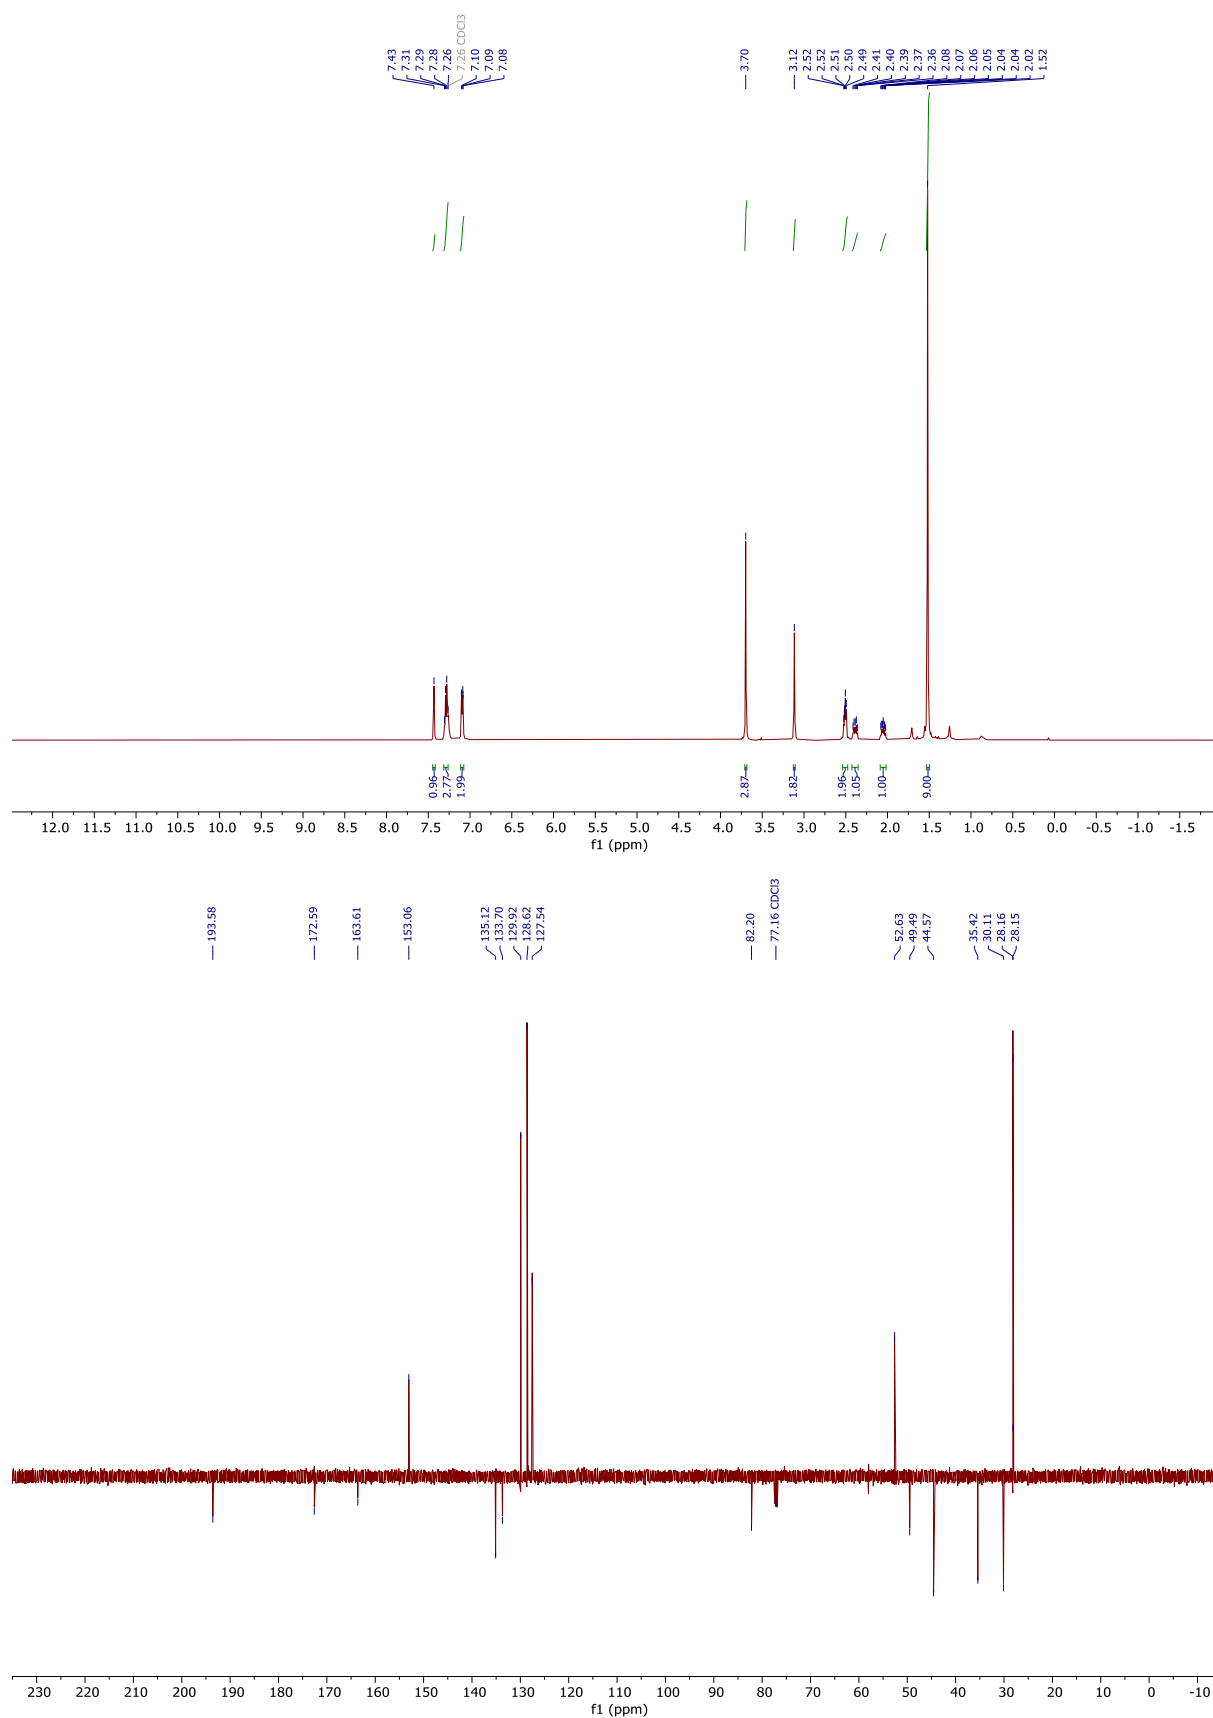

**Supplementary Fig. 35.** The <sup>1</sup>H-NMR (500 MHz) and APT-NMR (125 MHz) spectra of compound 8, 8R/8S in CDCl<sub>3</sub>

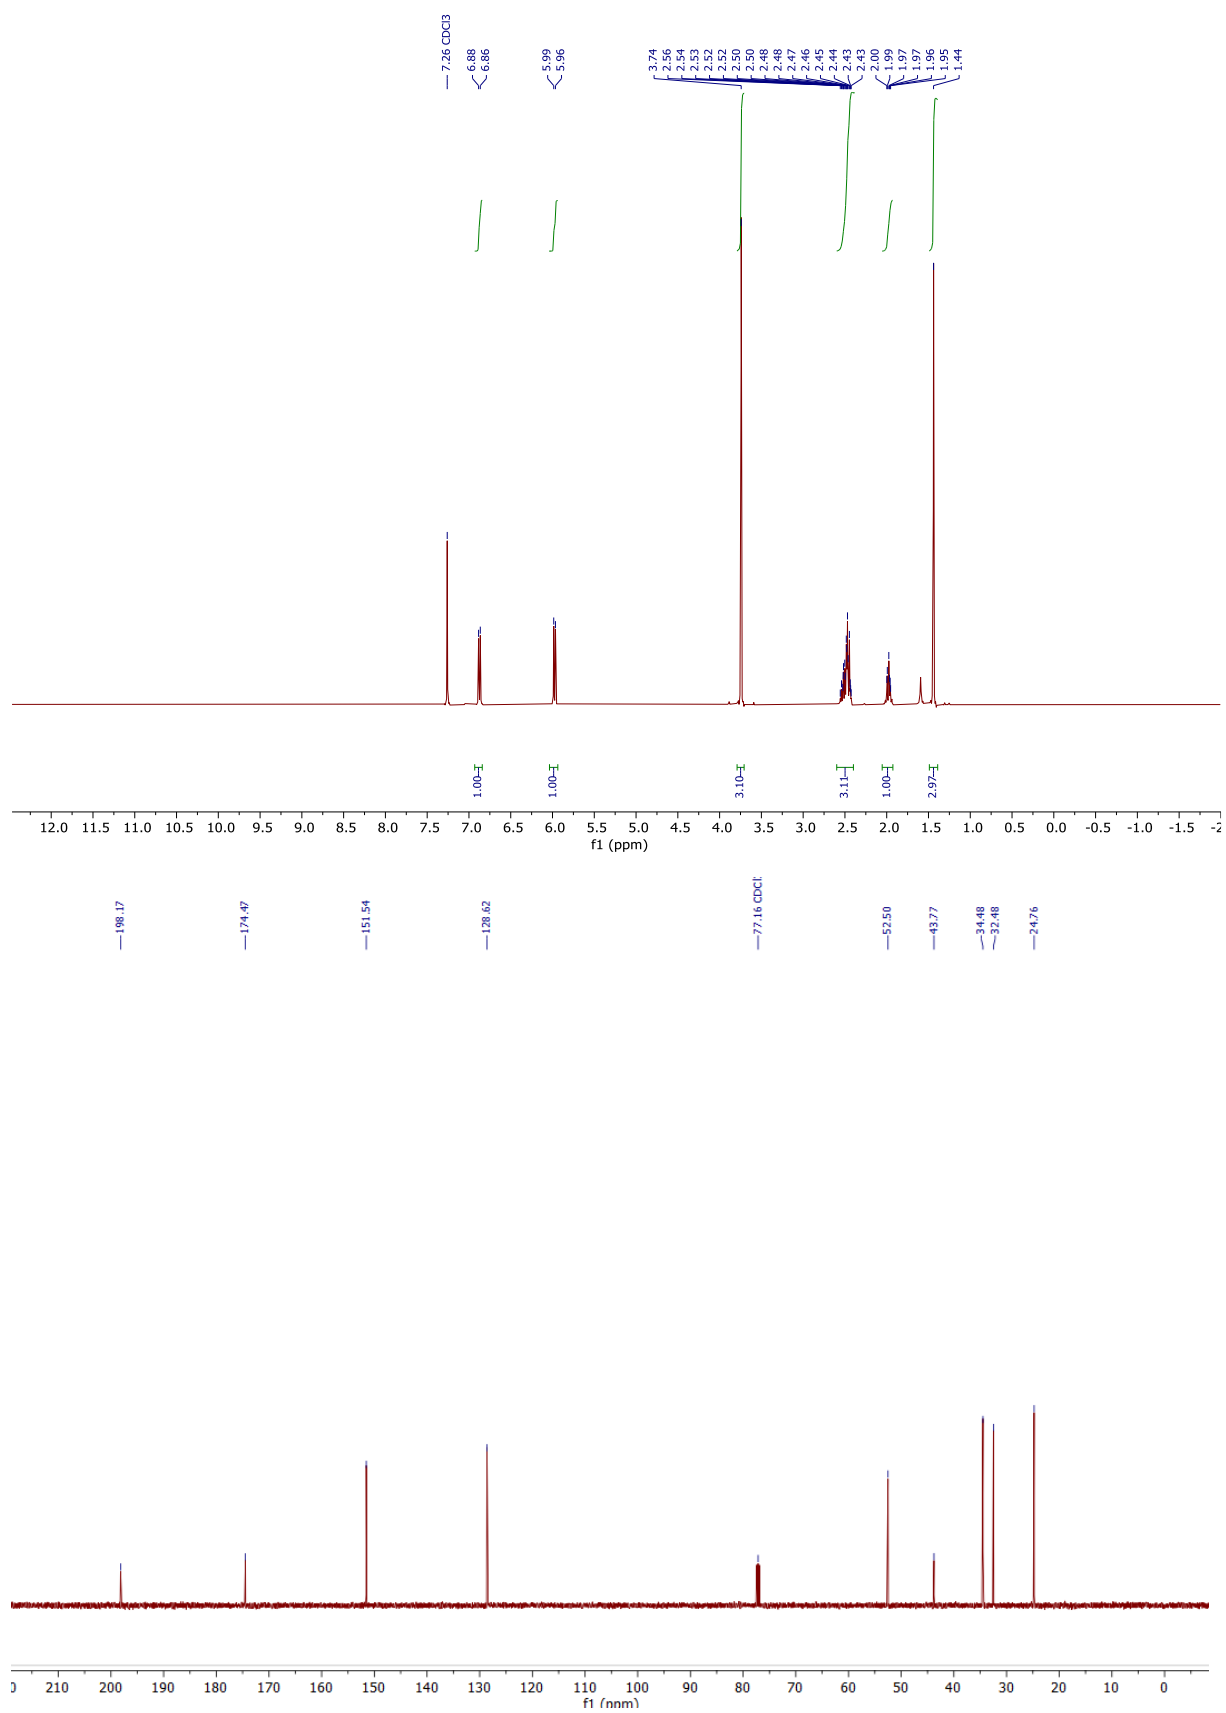

**Supplementary Fig. 36.** The  $^1\text{H-NMR}$  (500 MHz) and  $^{13}\text{C-NMR}$  (125 MHz) spectra of compound **9** in  $\text{CDCl}_3$

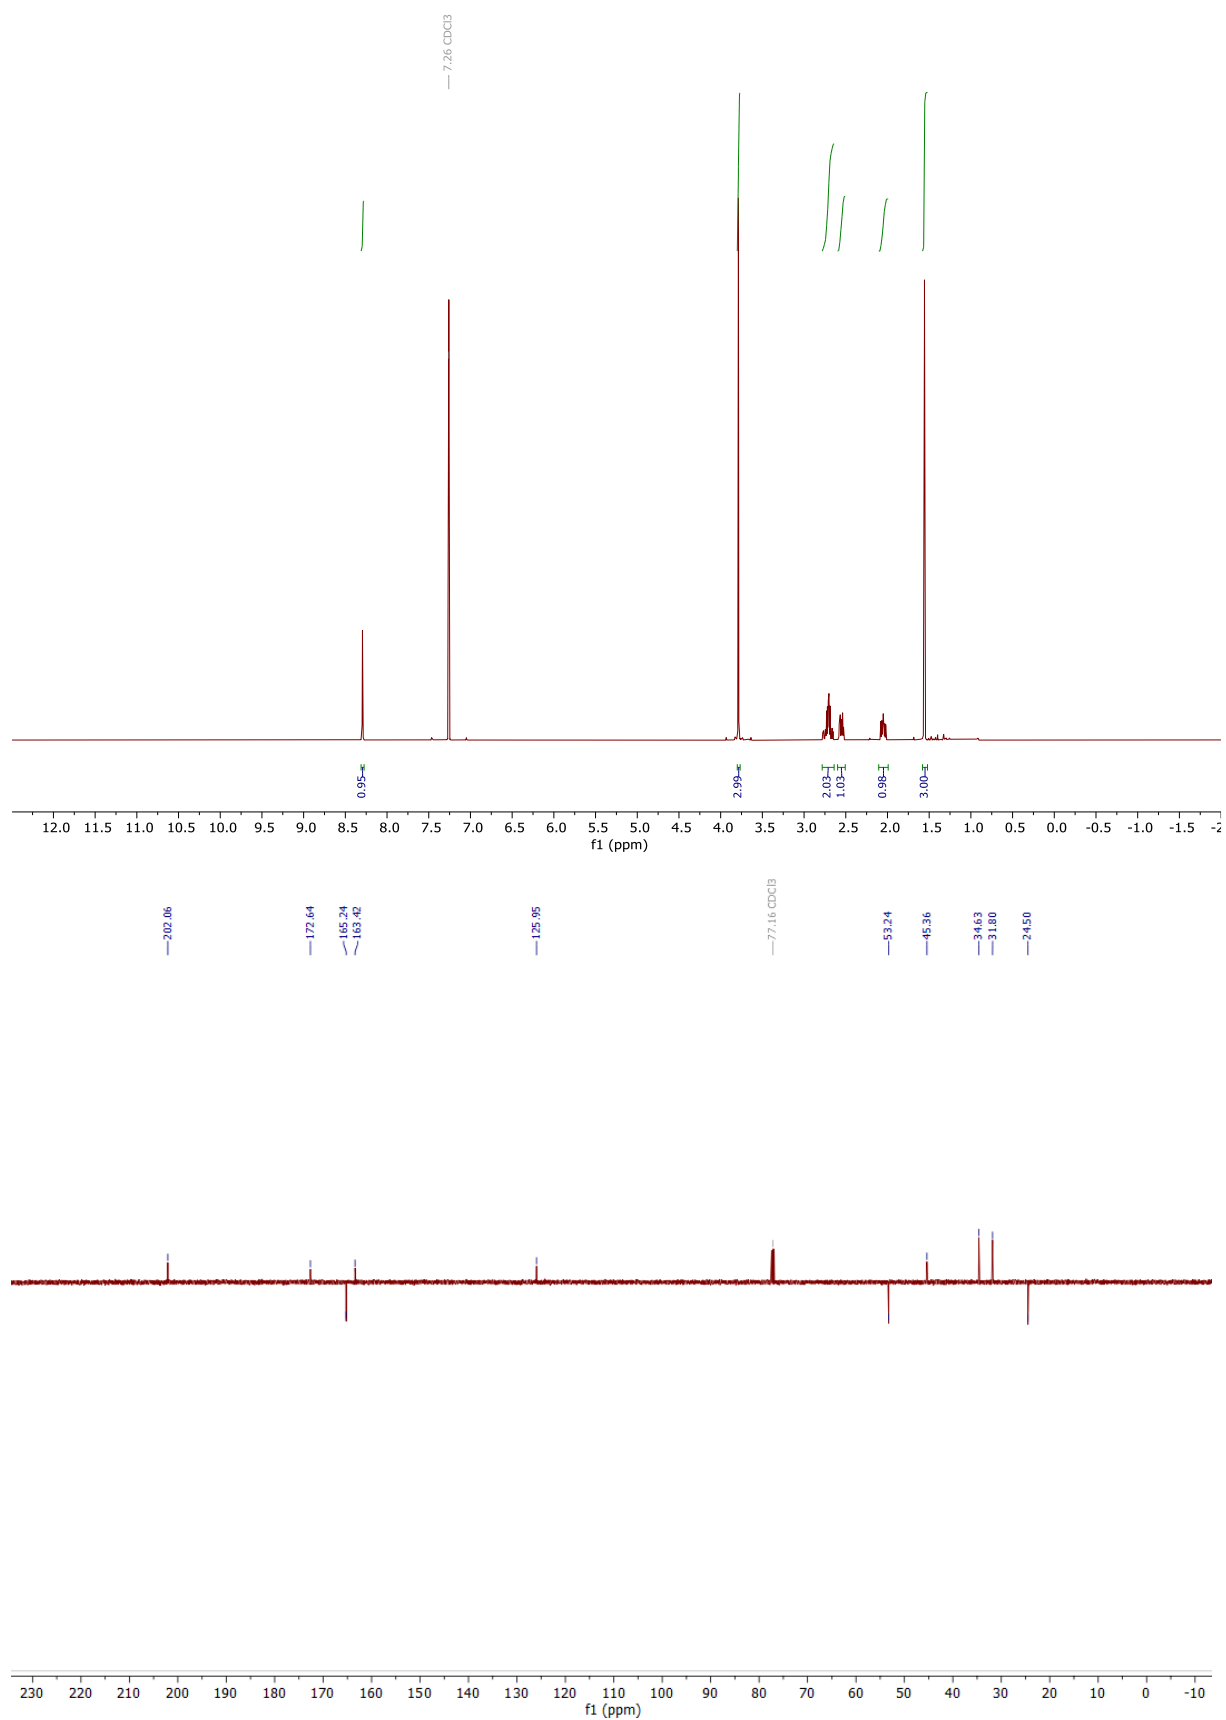

**Supplementary Fig. 37.** The <sup>1</sup>H-NMR (500 MHz) and APT-NMR (125 MHz) spectra of compound 10,10R/10S in CDCl<sub>3</sub>

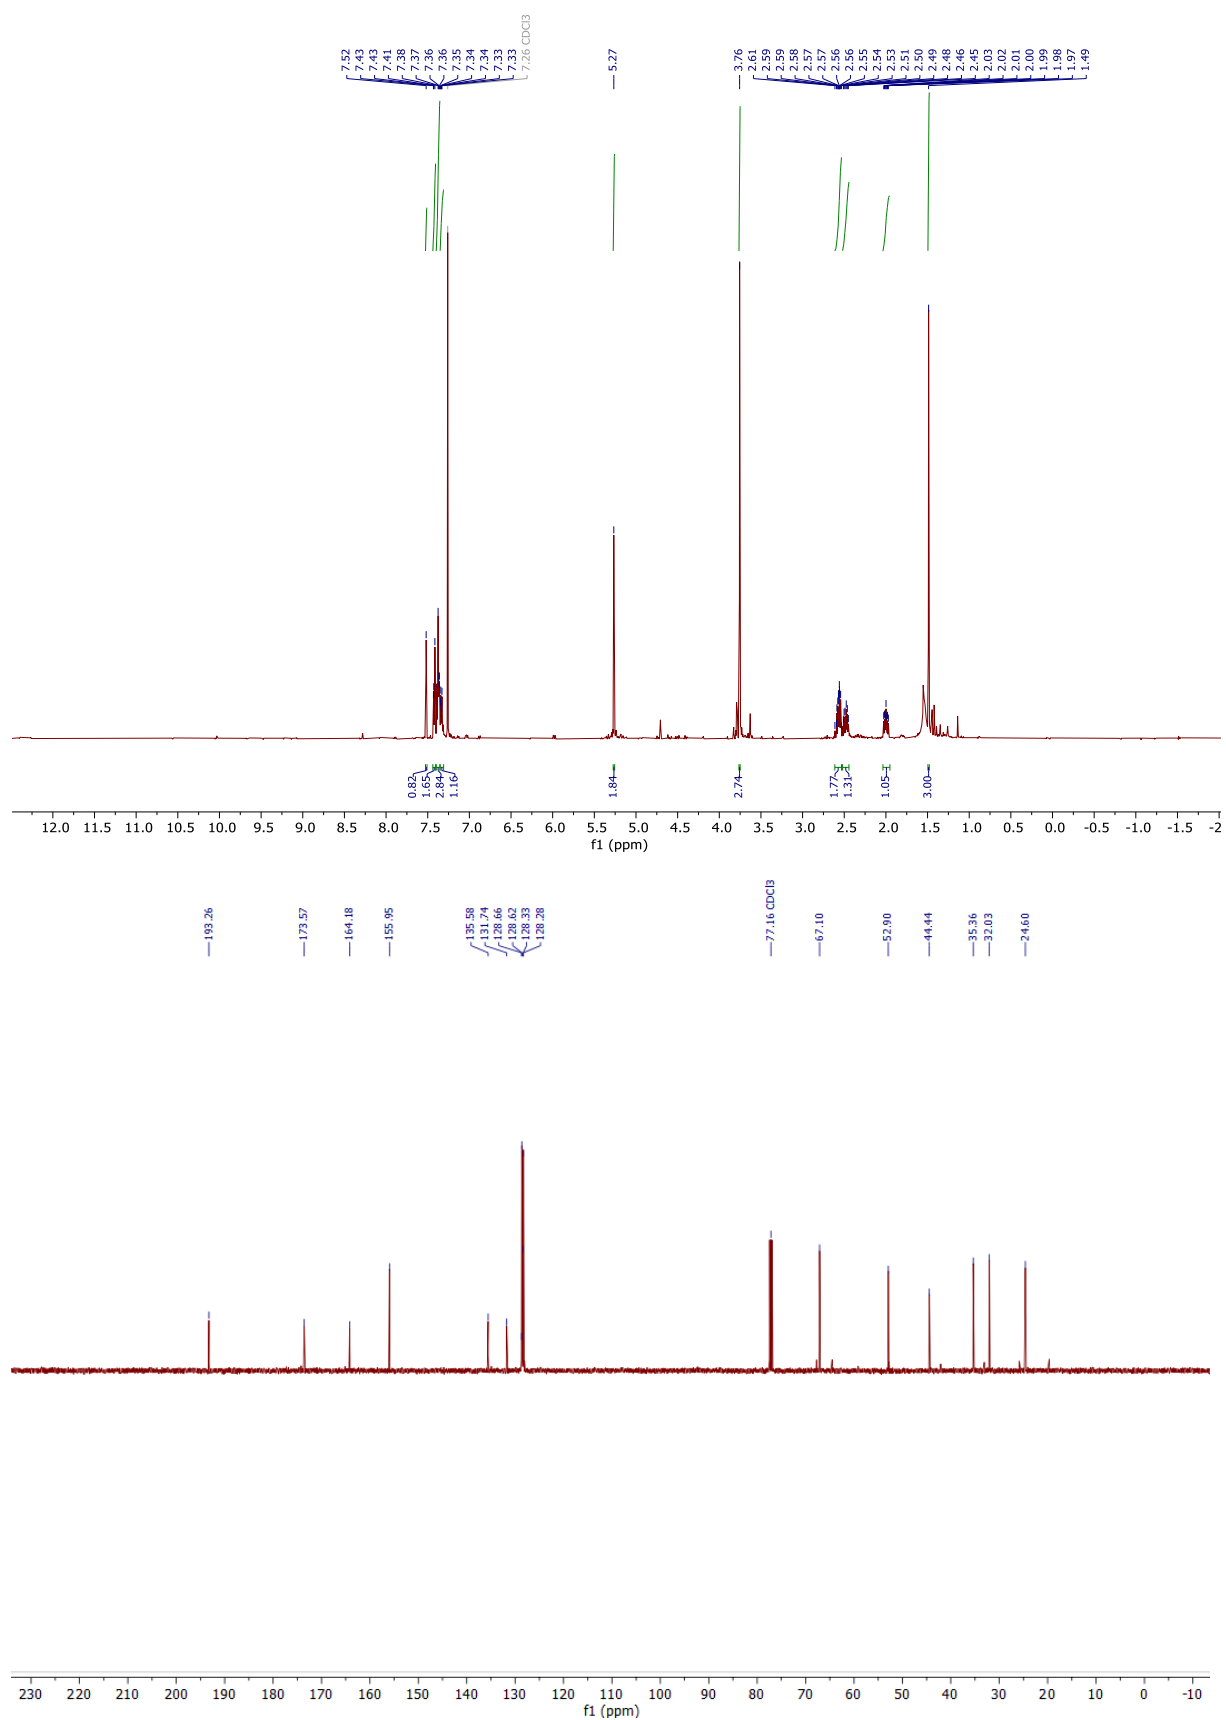

**Supplementary Fig. 38.** The <sup>1</sup>H-NMR (500 MHz) and <sup>13</sup>C-NMR (125 MHz) spectra of compound 12, 12R/12S in CDCl<sub>3</sub>

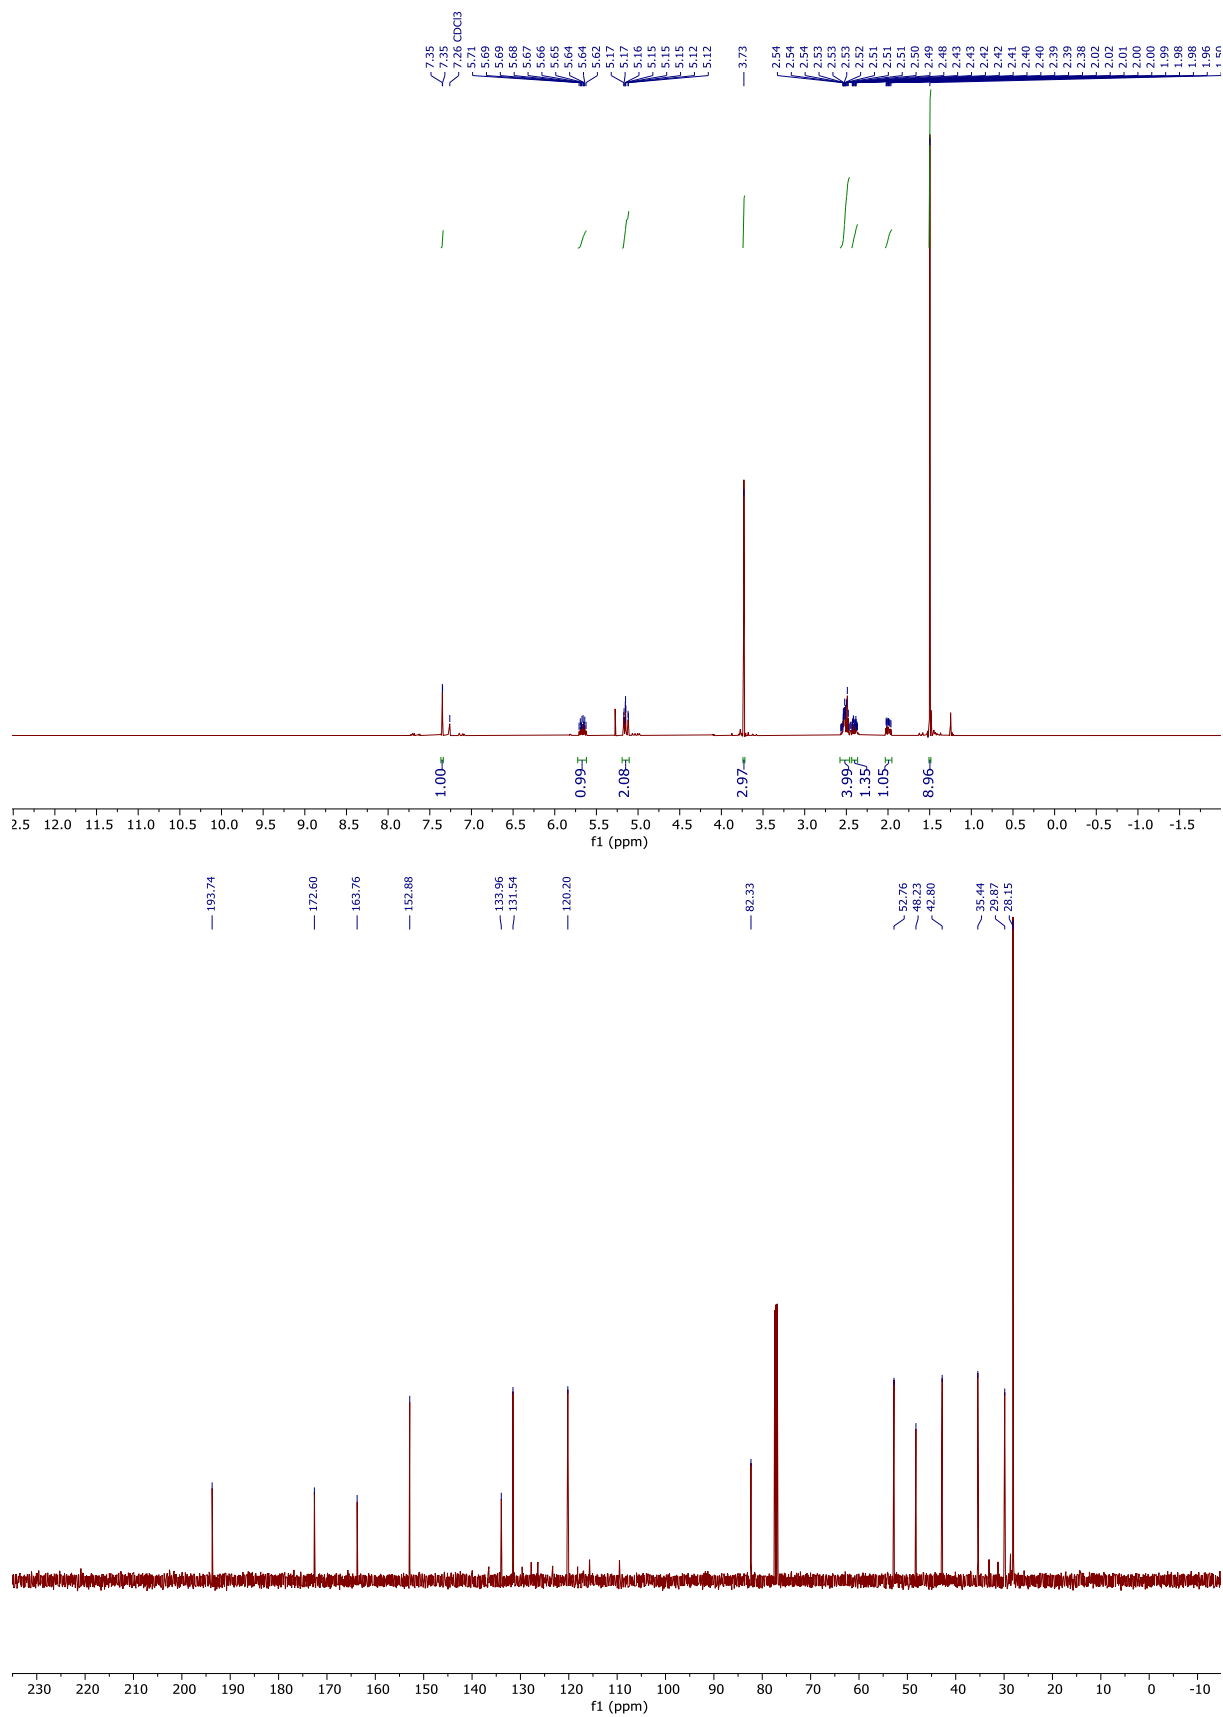

**Supplementary Fig. 39.** The <sup>1</sup>H-NMR (500 MHz) and <sup>13</sup>C-NMR (125 MHz) spectra of compound 13, 13R/13S in CDCl<sub>3</sub>

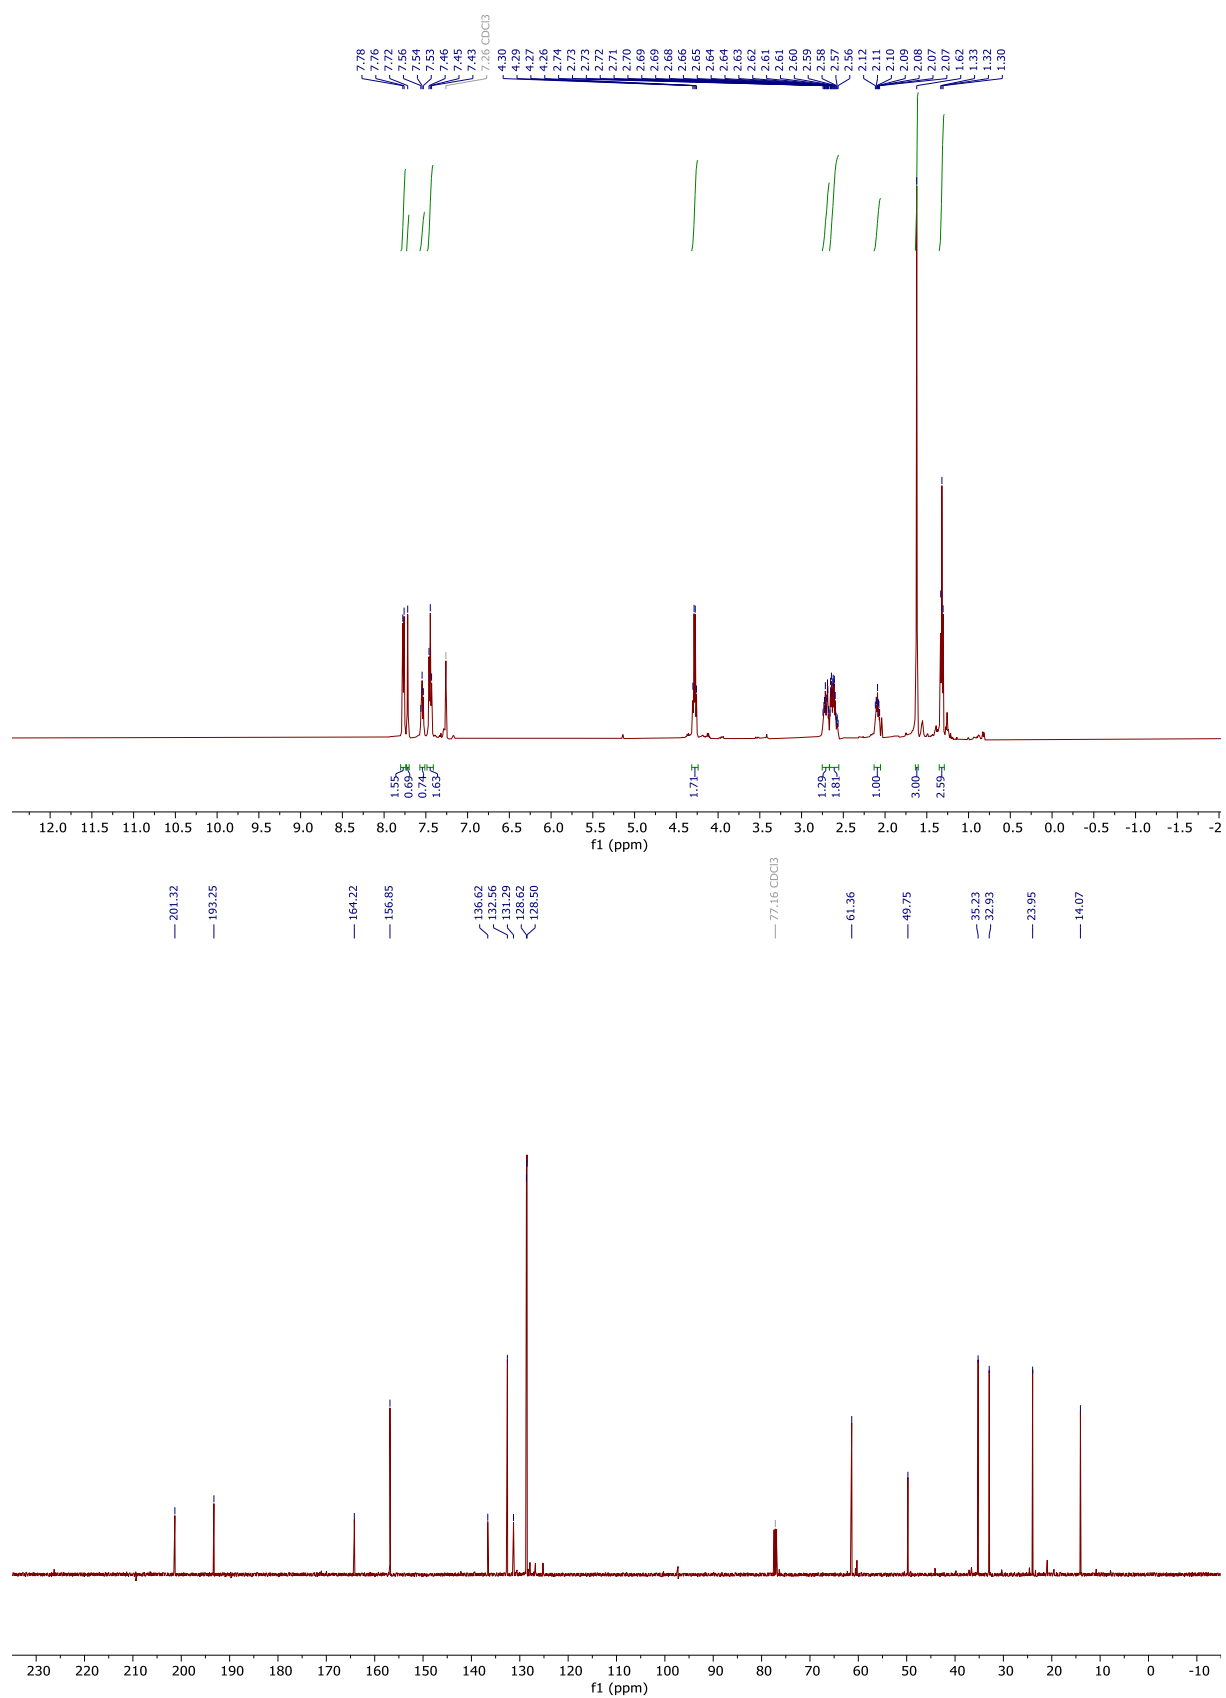

**Supplementary Fig. 40.** The <sup>1</sup>H-NMR (500 MHz) and <sup>13</sup>C-NMR (125 MHz) spectra of compound **14** in CDCl<sub>3</sub>

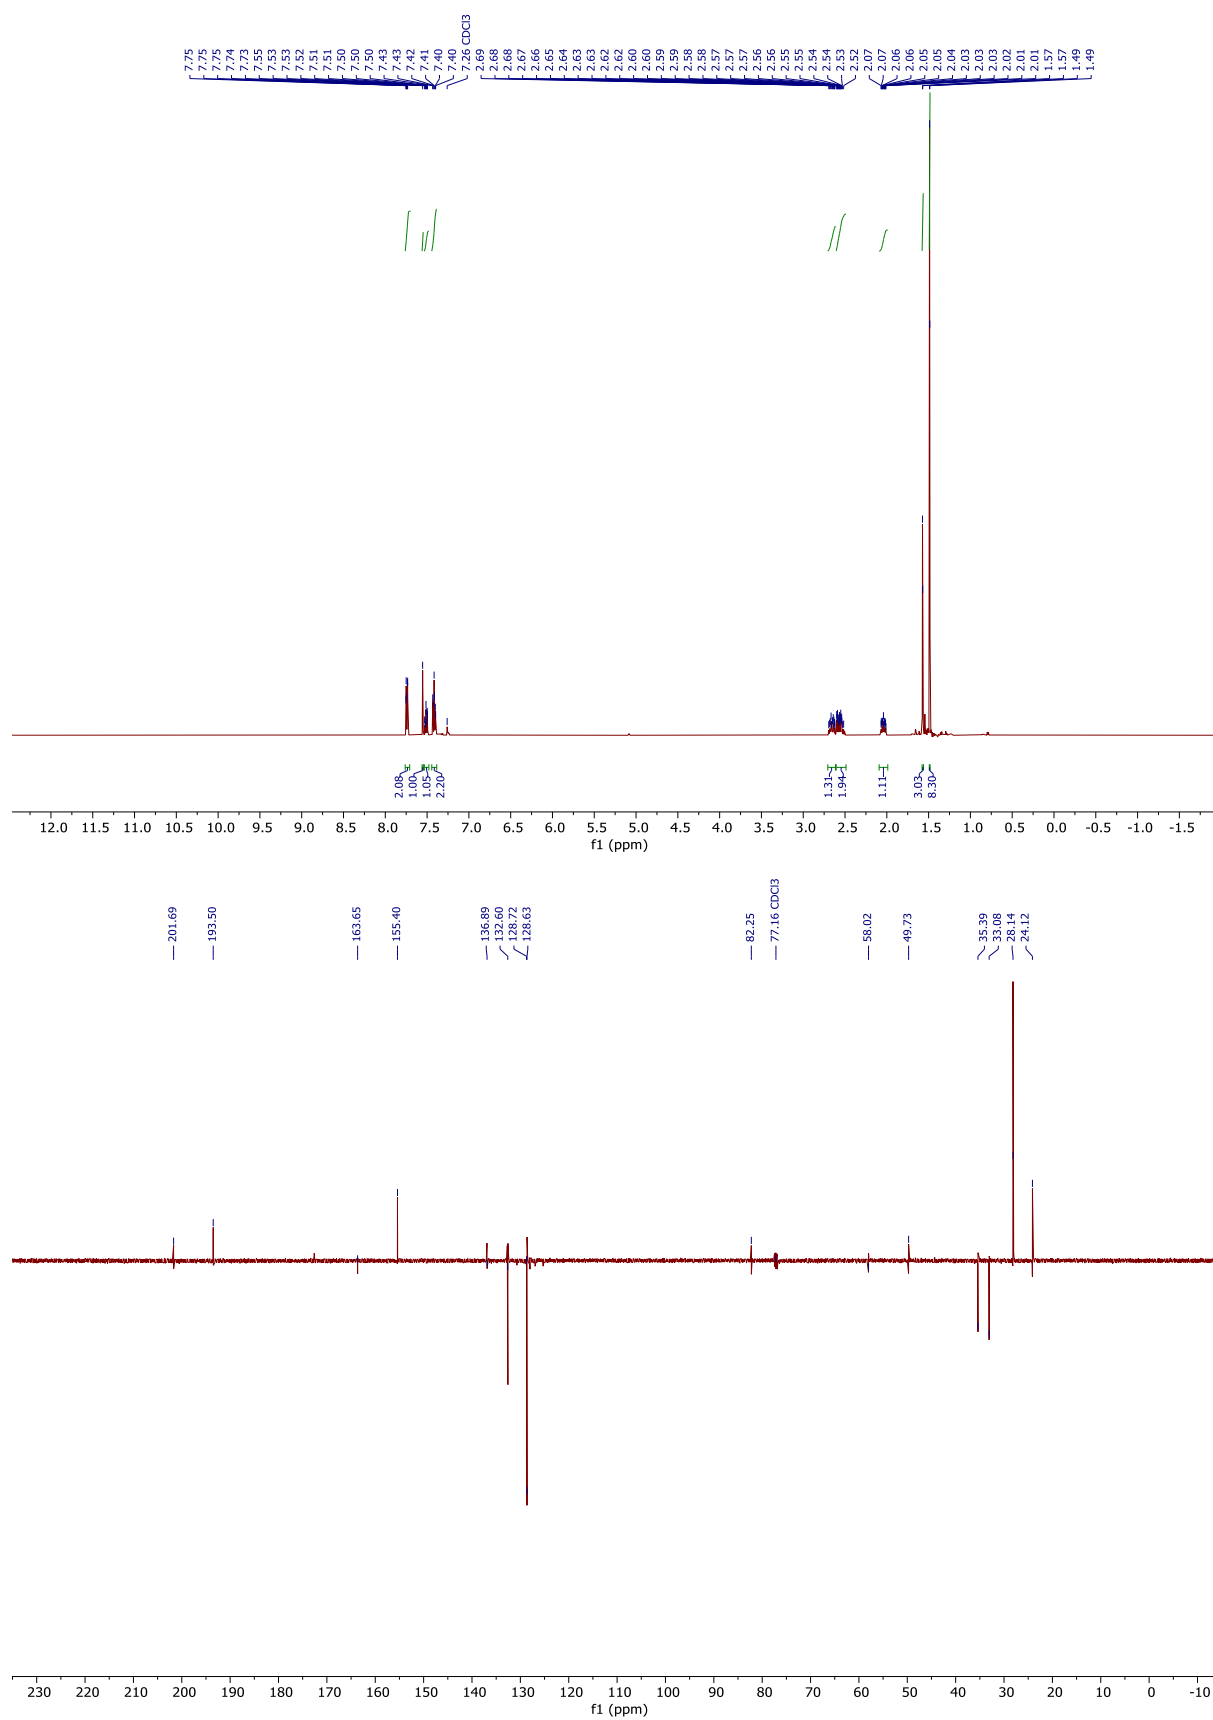

**Supplementary Fig. 41.** The <sup>1</sup>H-NMR (500 MHz) and APT-NMR (125 MHz) spectra of compound 15 in CDCl<sub>3</sub>



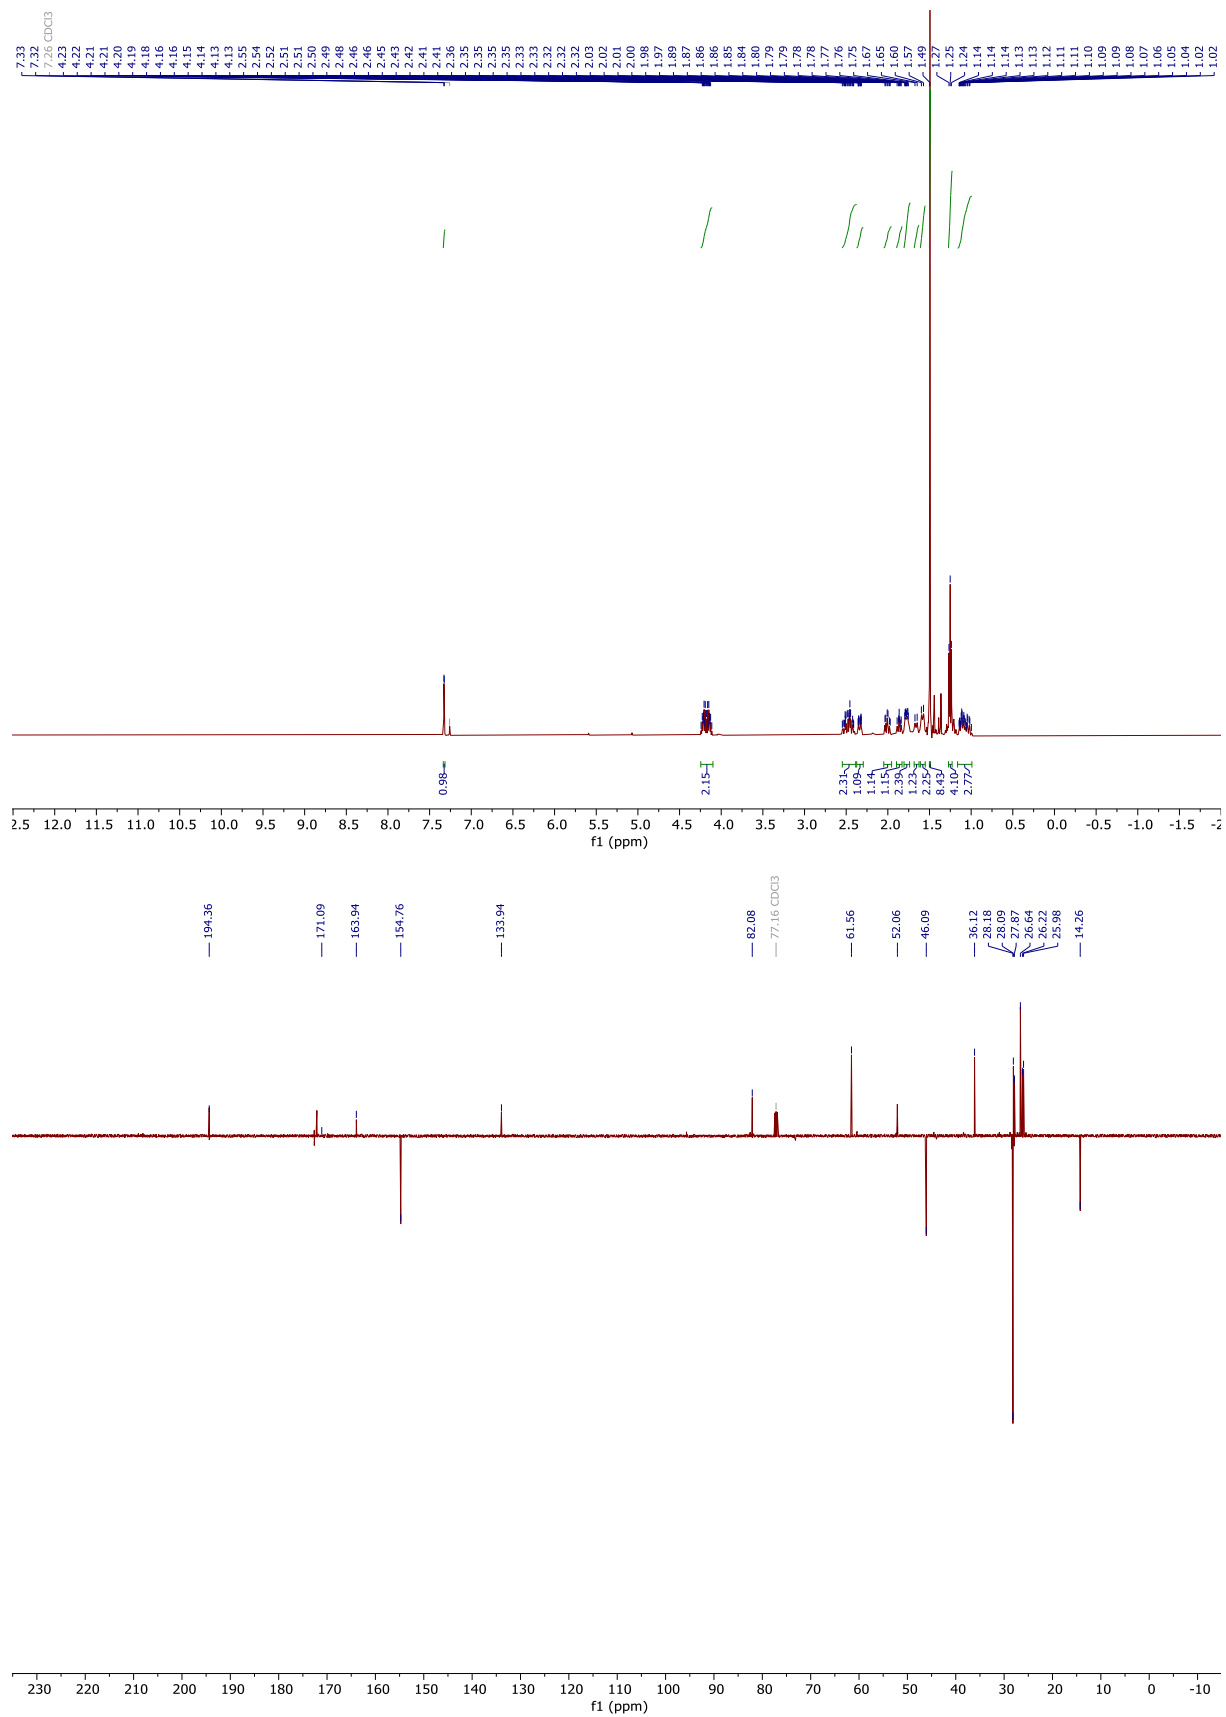

**Supplementary Fig. 42.** The <sup>1</sup>H-NMR (500 MHz) and APT-NMR (125 MHz) spectra of compound **16** in CDCl<sub>3</sub>

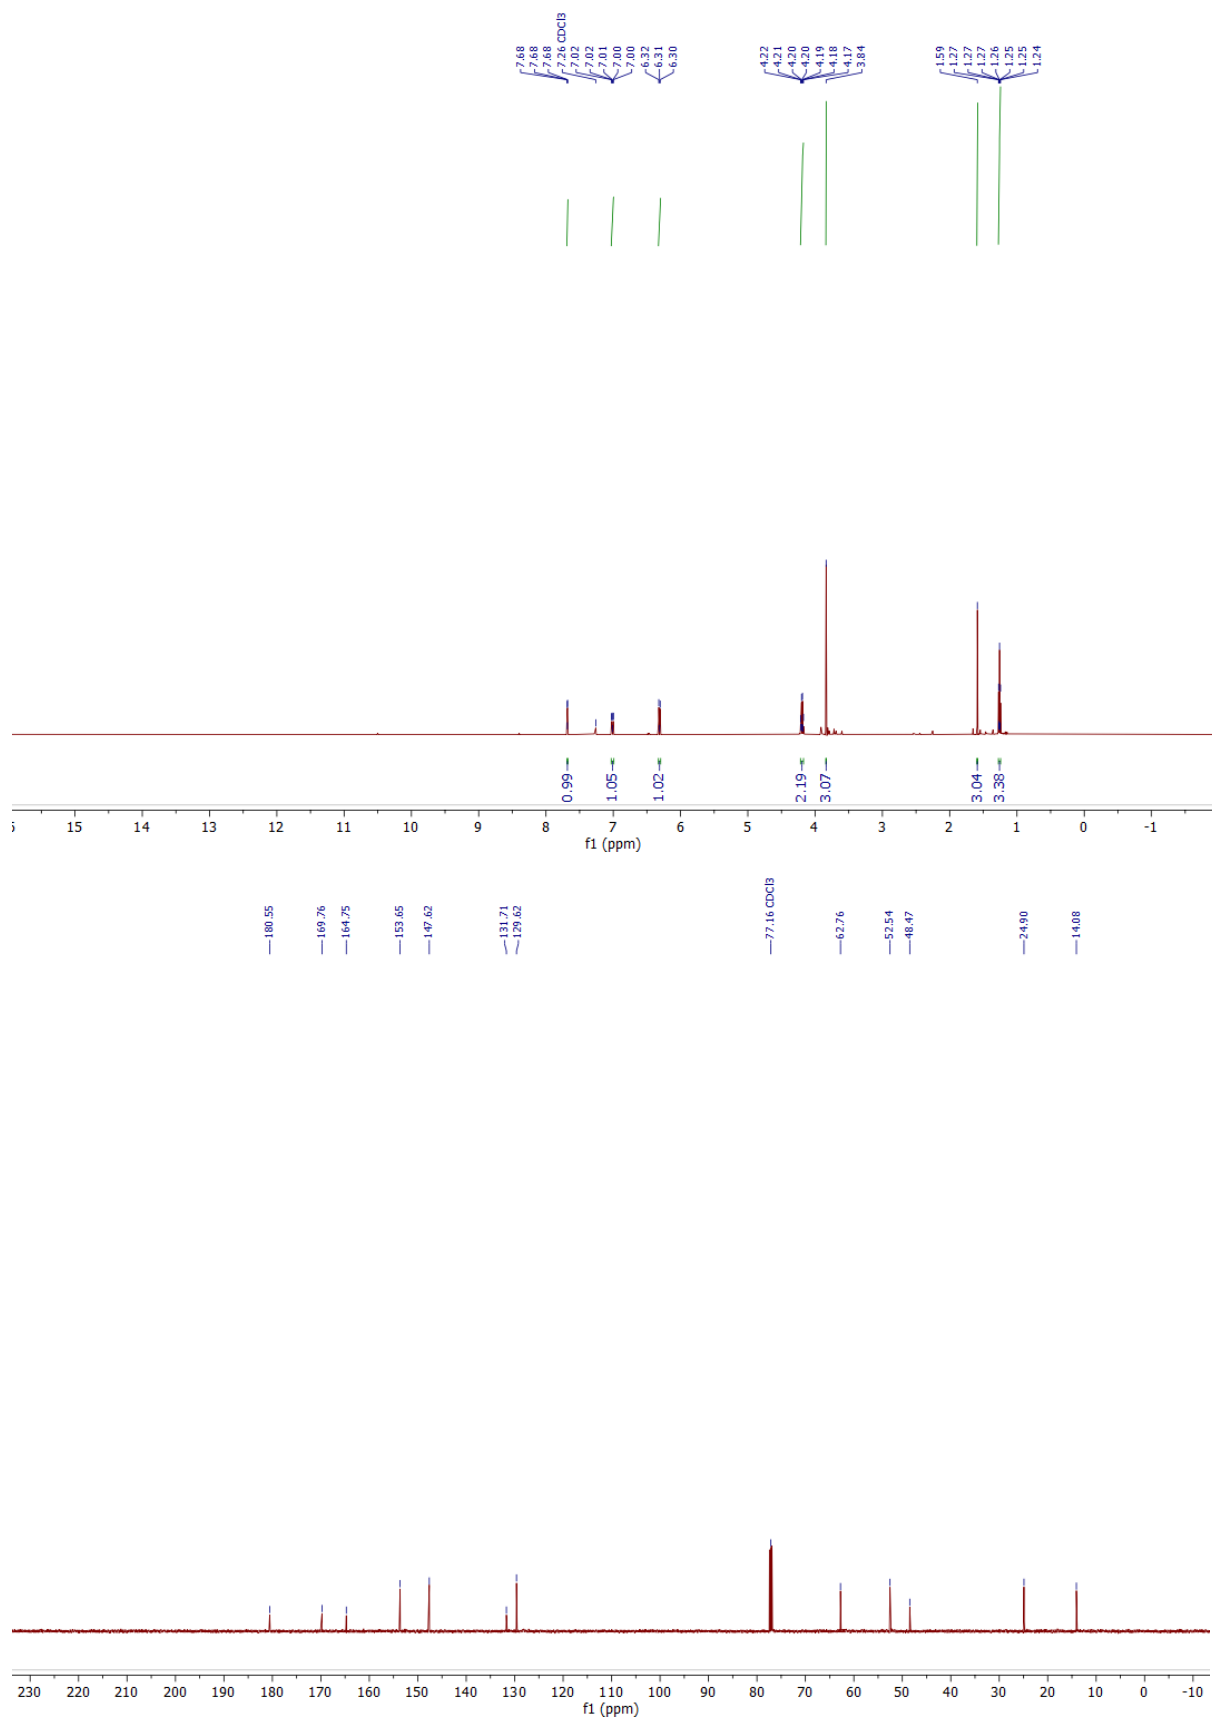

**Supplementary Fig. 43.** The <sup>1</sup>H-NMR (500 MHz) and <sup>13</sup>C-NMR (125 MHz) spectra of compound 17 in CDCl<sub>3</sub>

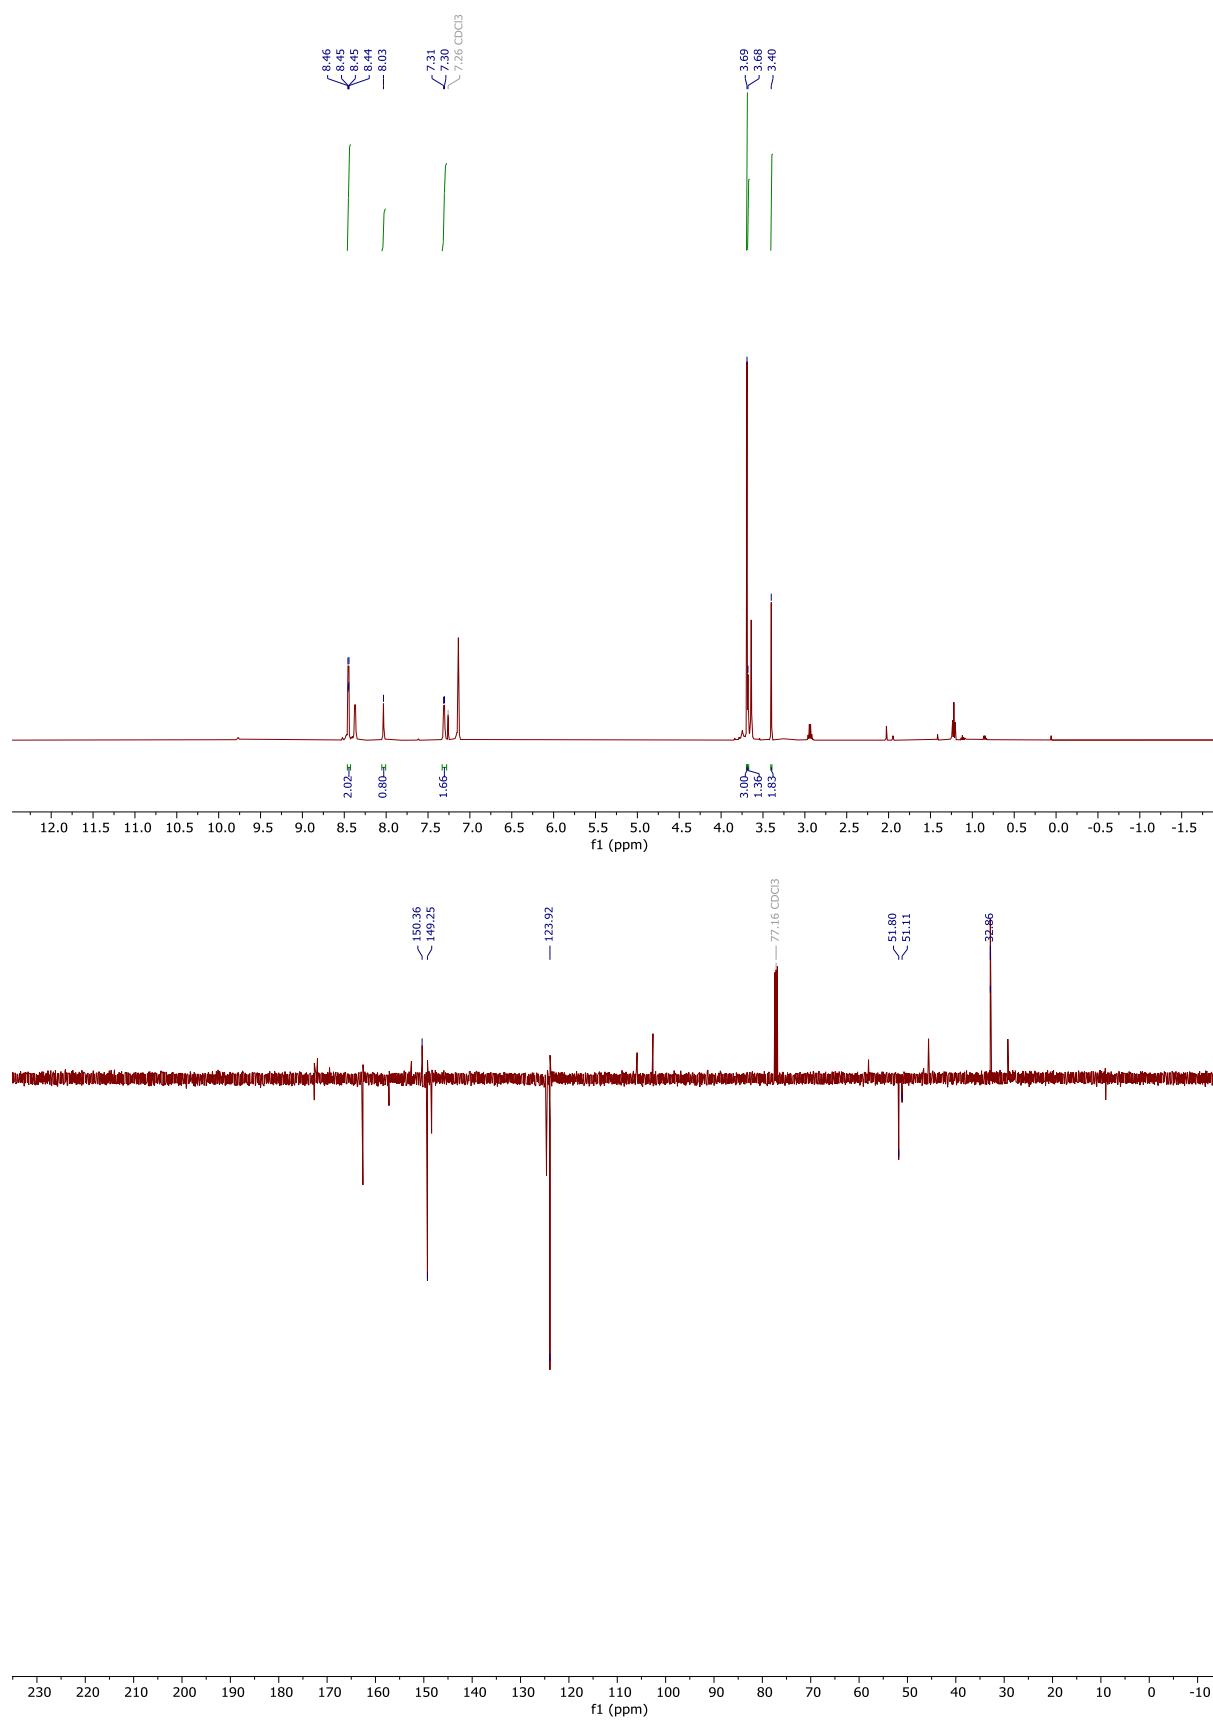

**Supplementary Fig. 44.** The <sup>1</sup>H-NMR (500 MHz) and APT-NMR (125 MHz) spectra of compound S2k in CDCl<sub>3</sub>

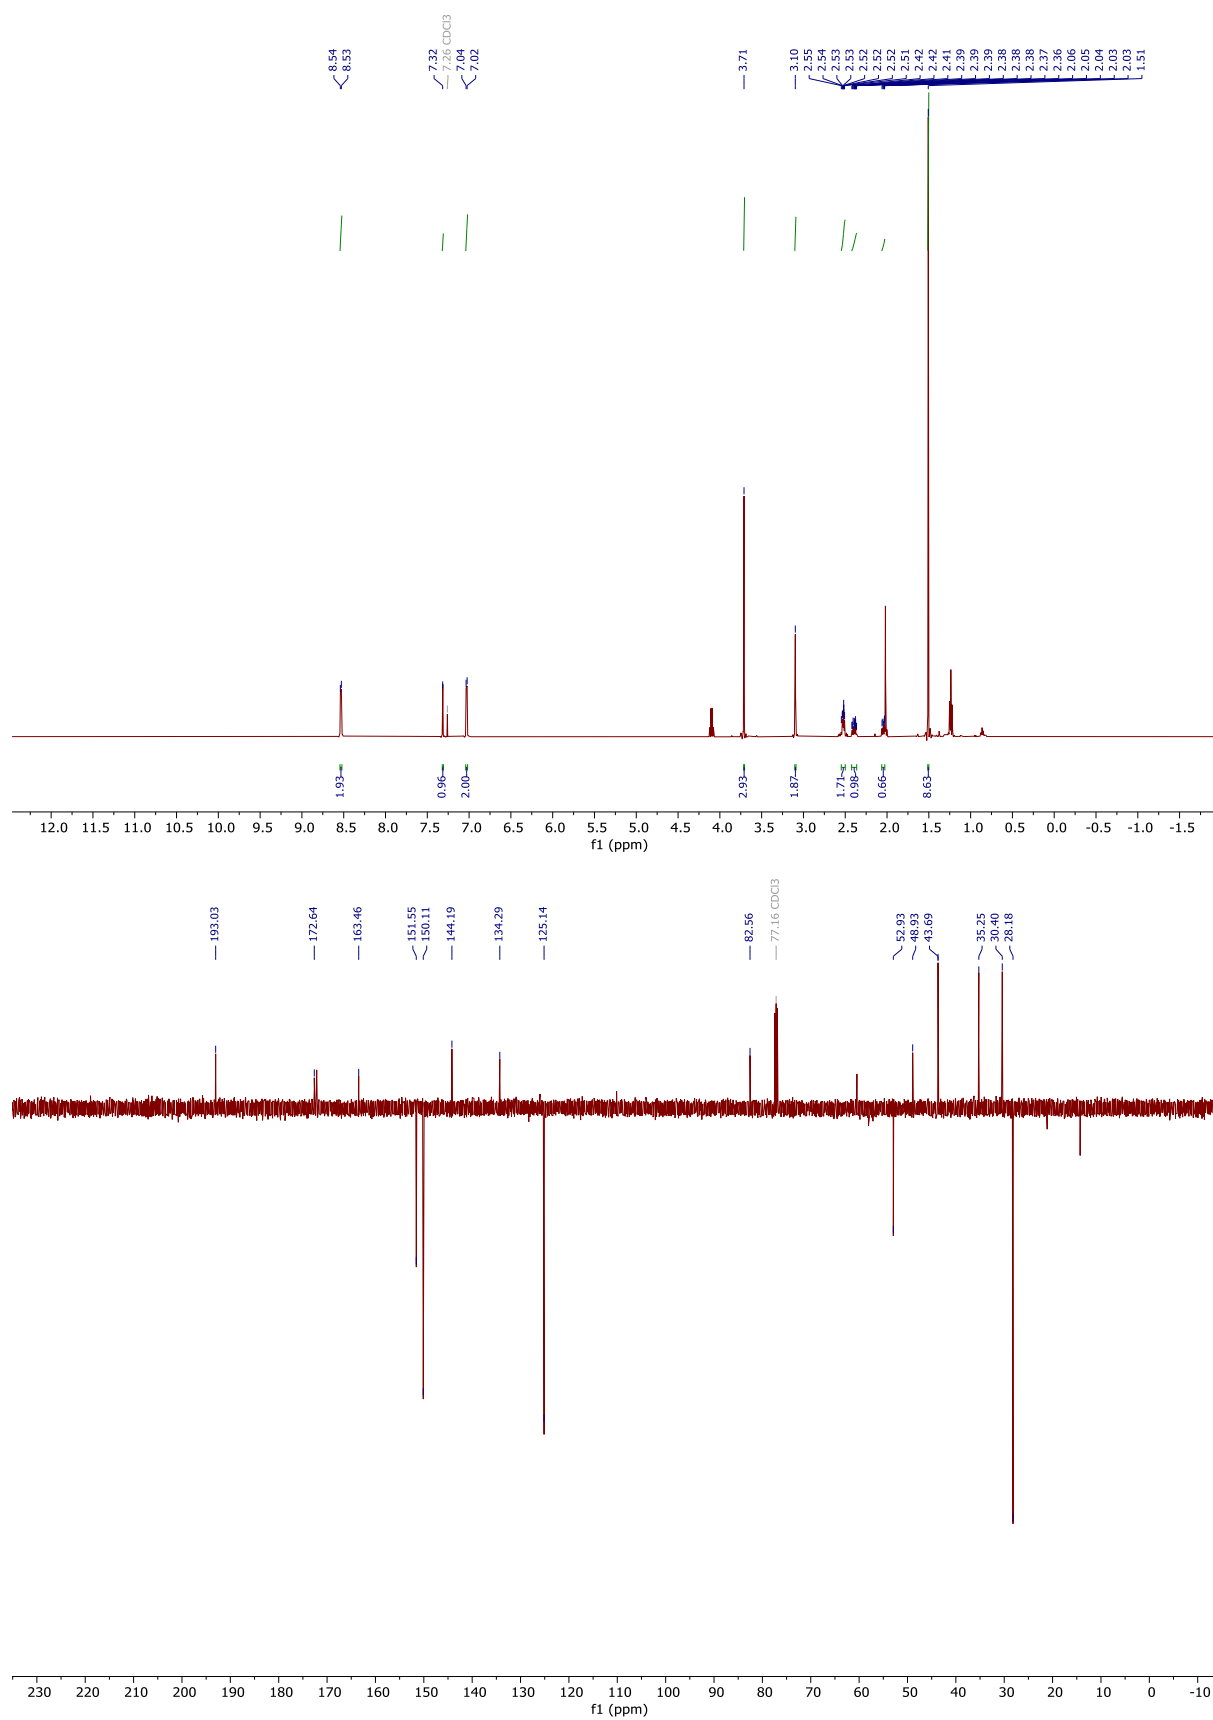

**Supplementary Fig. 45.** The <sup>1</sup>H-NMR (500 MHz) and APT-NMR (125 MHz) spectra of compound S7 in CDCl<sub>3</sub>

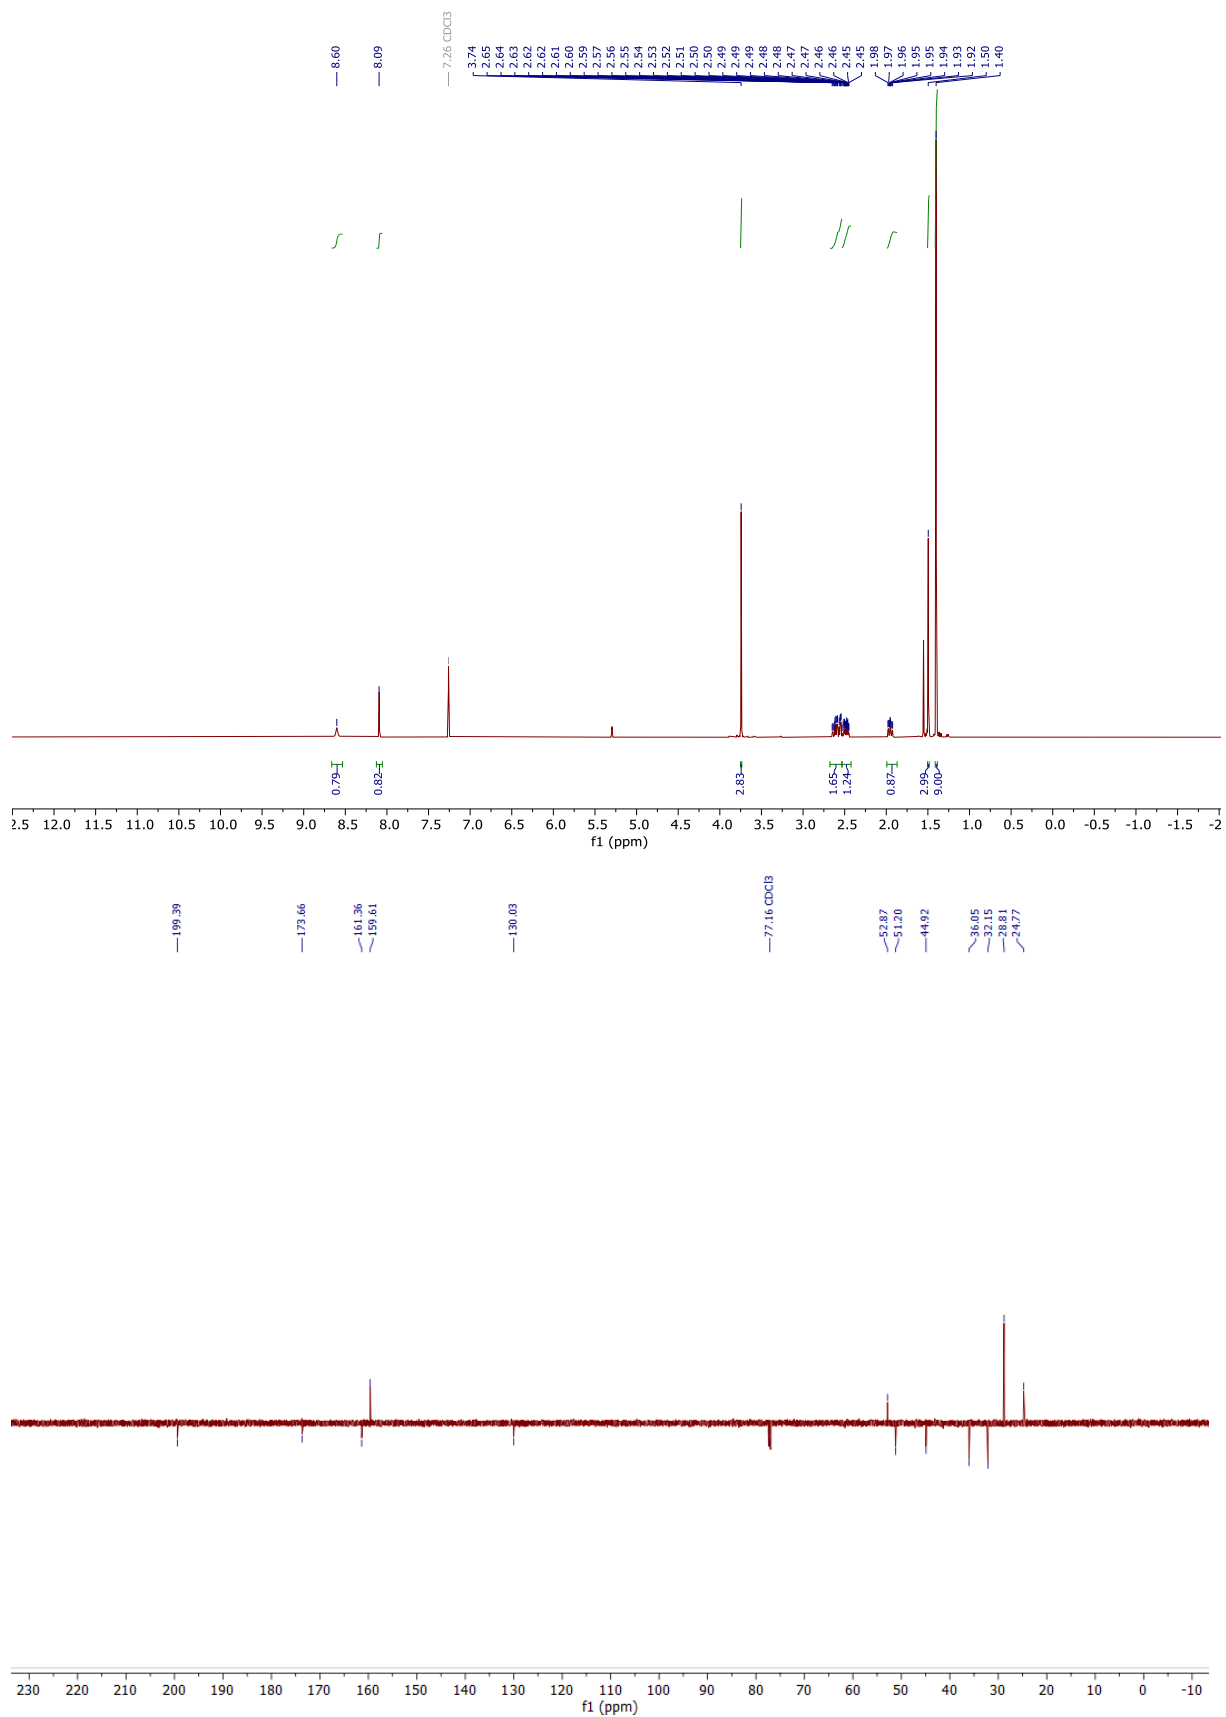

**Supplementary Fig. 46.** The  $^1\text{H-NMR}$  (500 MHz) and APT-NMR (125 MHz) spectra of compound **18/18R** in  $\text{CDCl}_3$



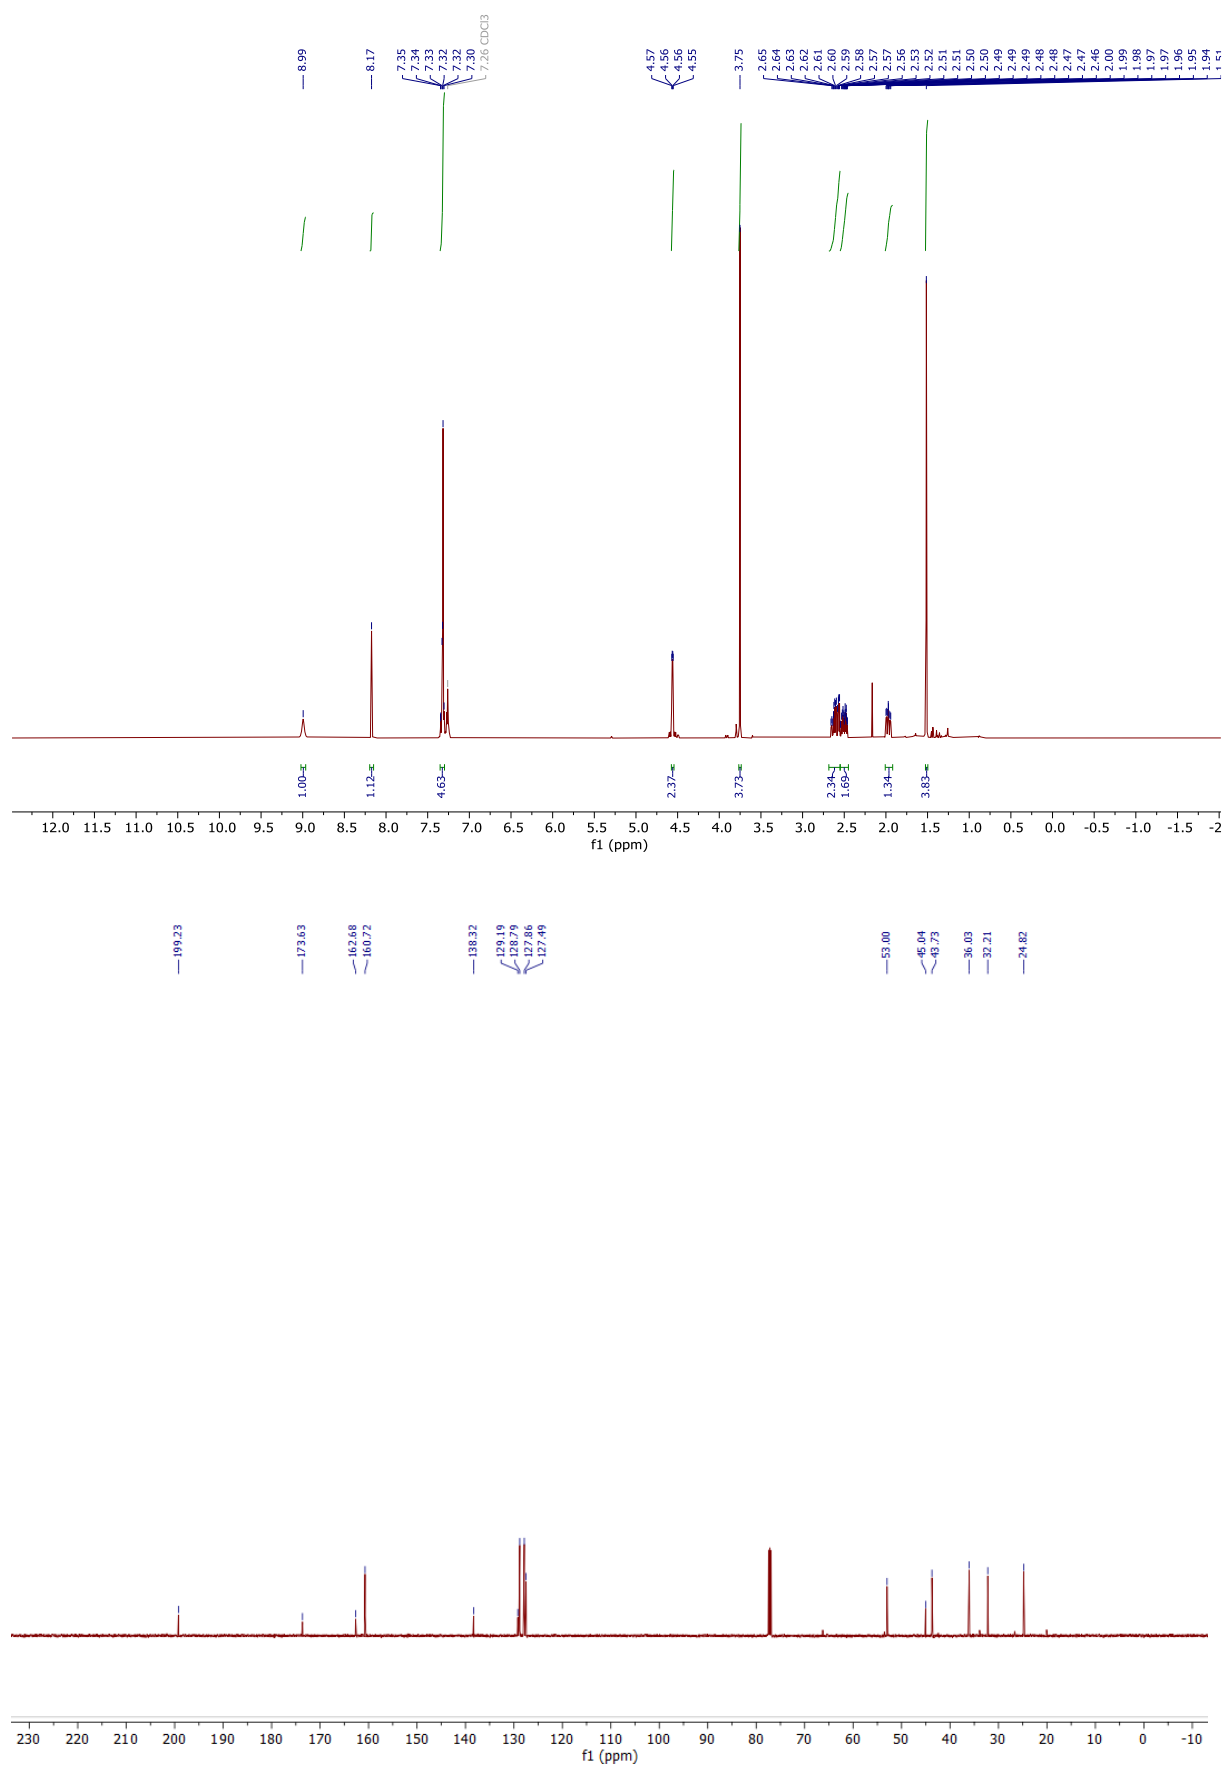

**Supplementary Fig. 48.** The <sup>1</sup>H-NMR (500 MHz) and <sup>13</sup>C-NMR (125 MHz) spectra of compound **20** in CDCl<sub>3</sub>

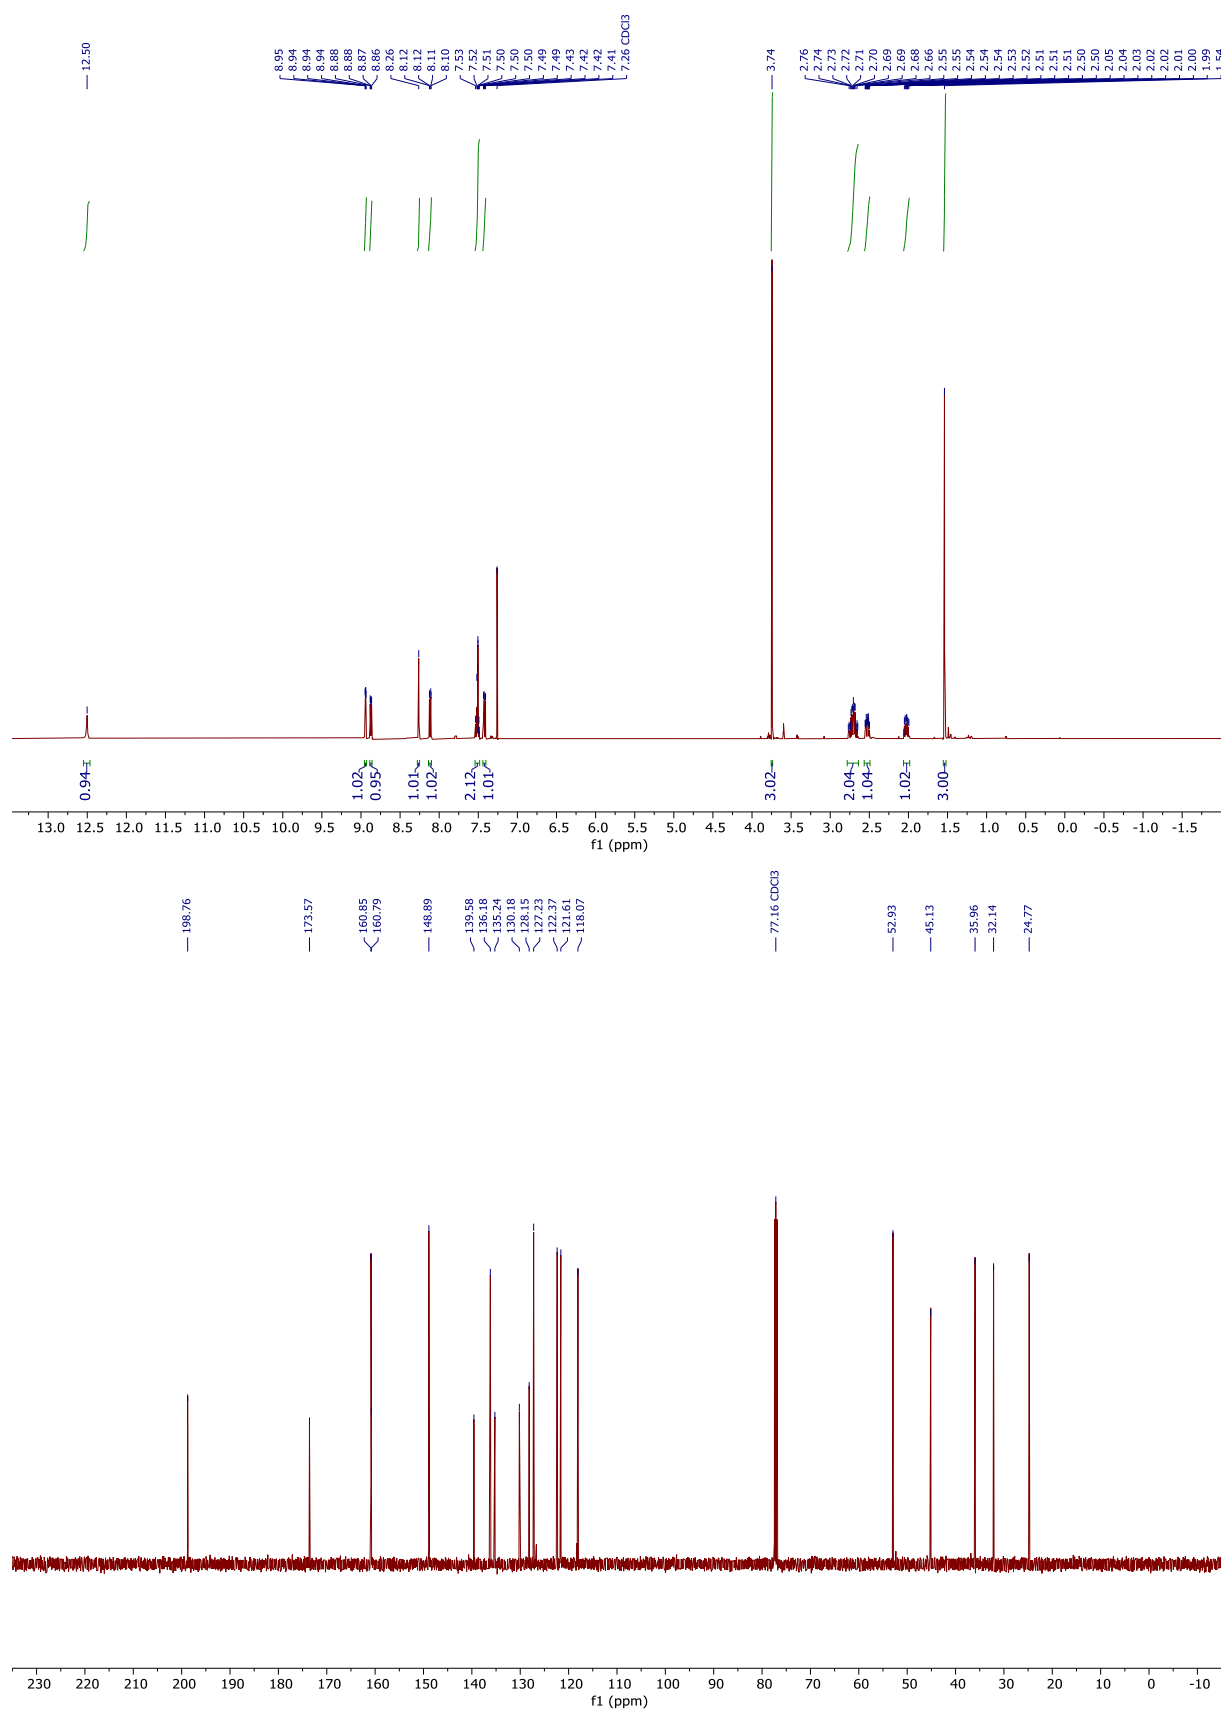

**Supplementary Fig. 49.** The <sup>1</sup>H-NMR (500 MHz) and <sup>13</sup>C-NMR (125 MHz) spectra of compound 21 in CDCl<sub>3</sub>



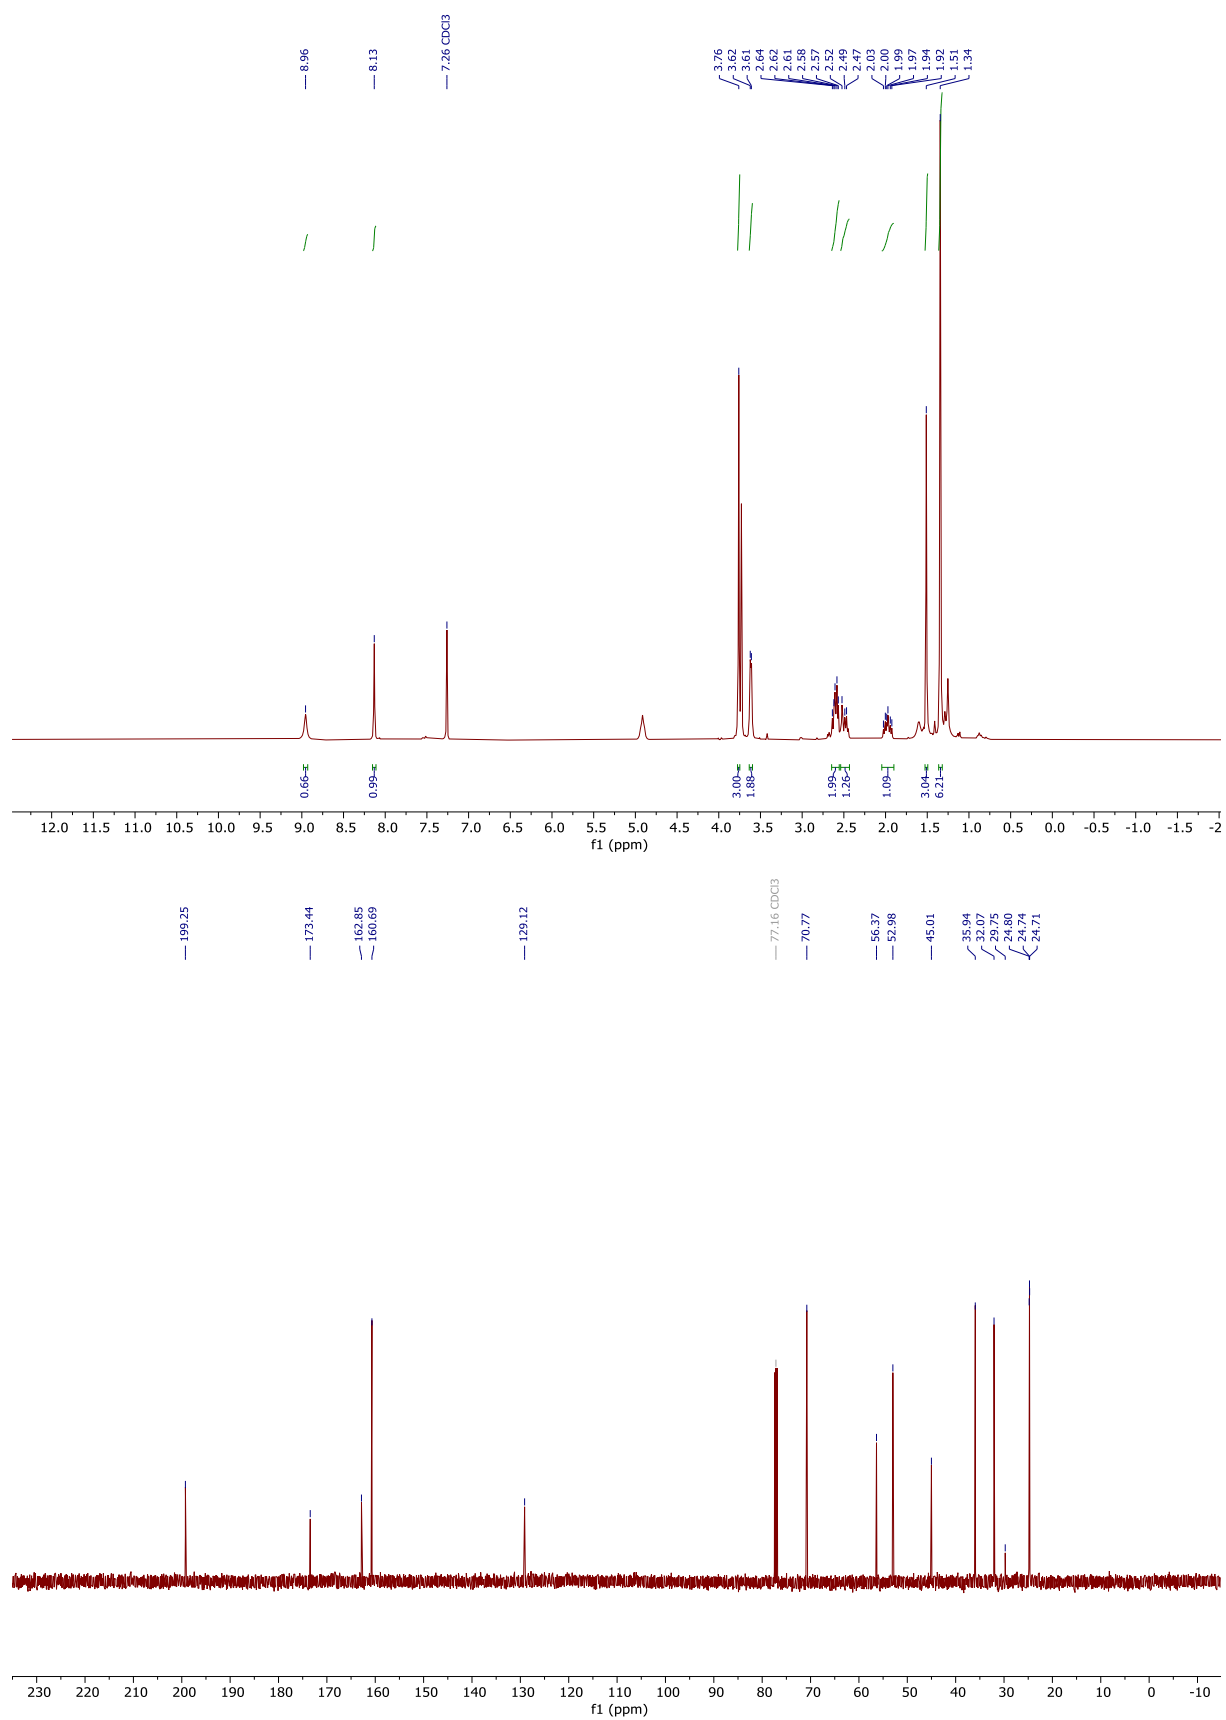

**Supplementary Fig. 50.** The <sup>1</sup>H-NMR (300 MHz) and <sup>13</sup>C-NMR (75 MHz) spectra of compound 22 in CDCl<sub>3</sub>

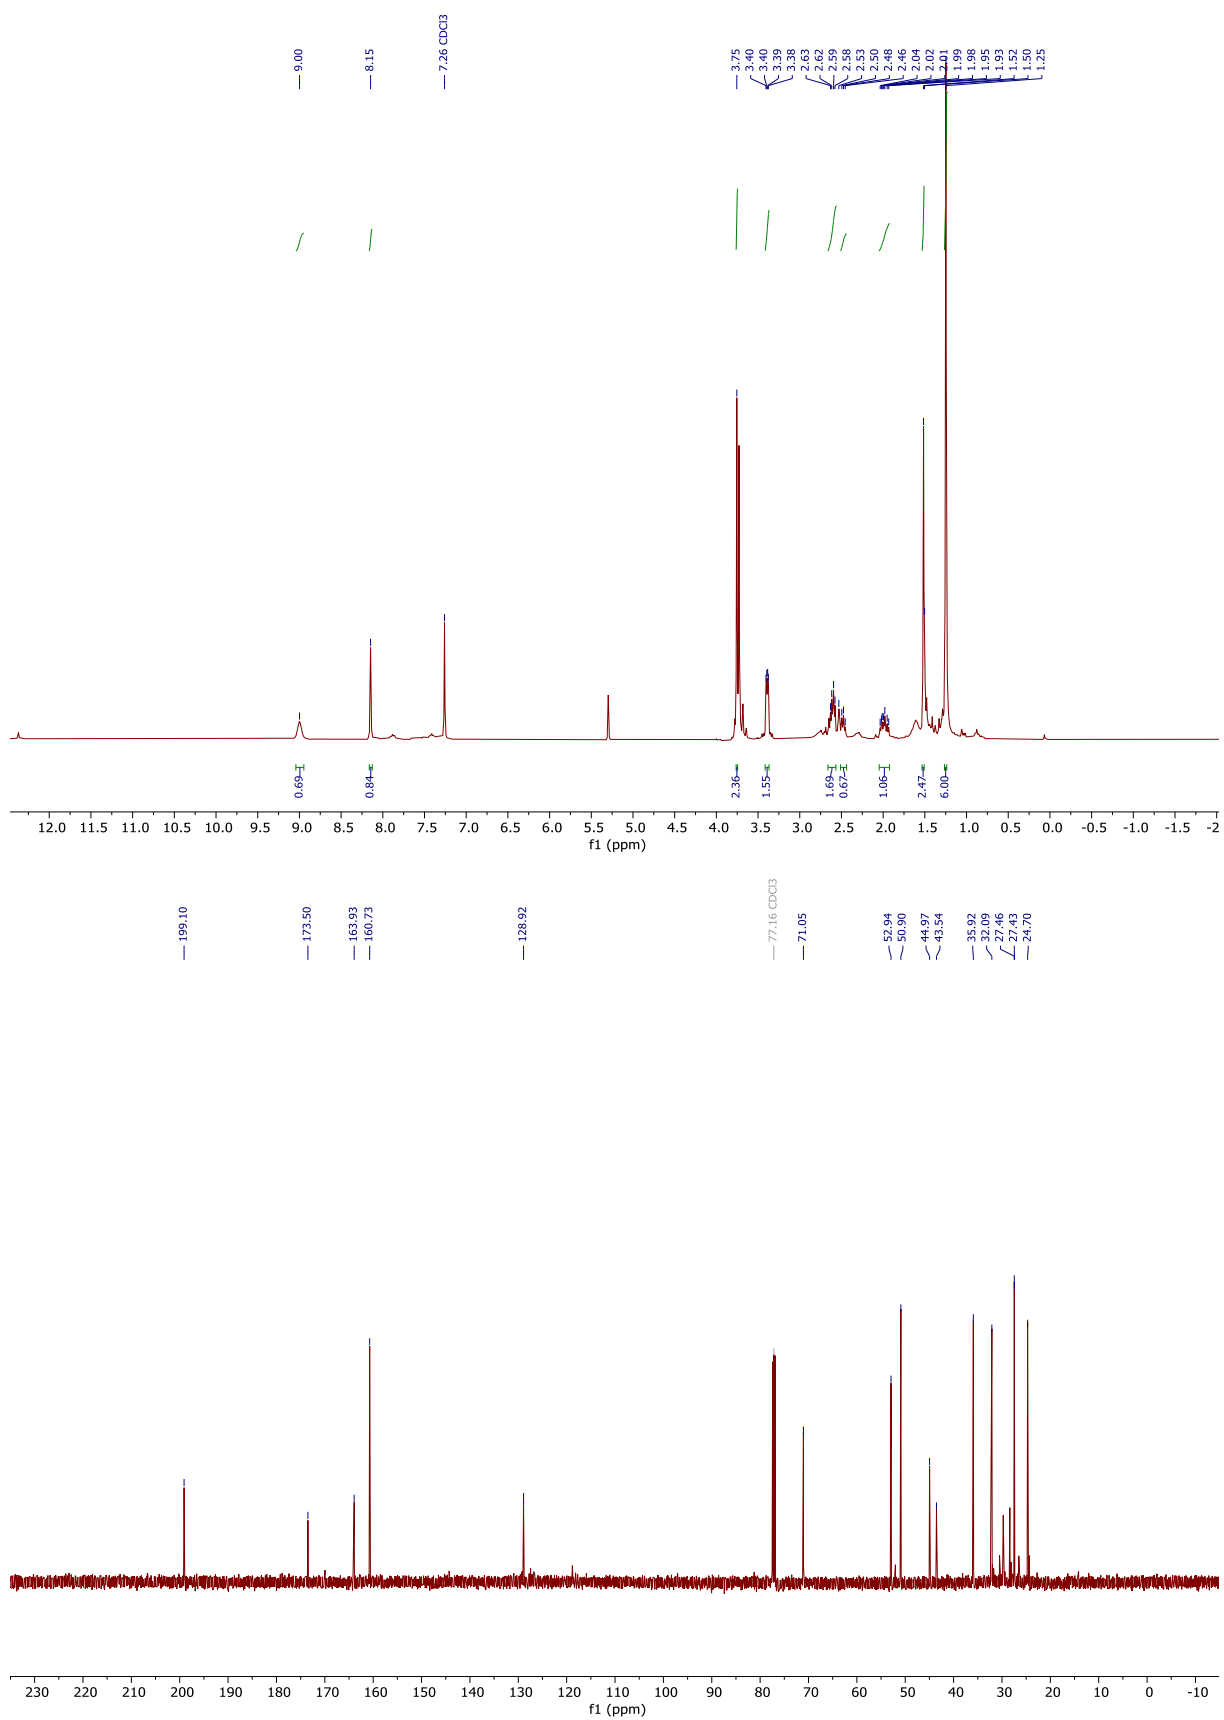

**Supplementary Fig. 51.** The <sup>1</sup>H-NMR (300 MHz) and <sup>13</sup>C-NMR (75 MHz) spectra of compound **23** in CDCl<sub>3</sub>

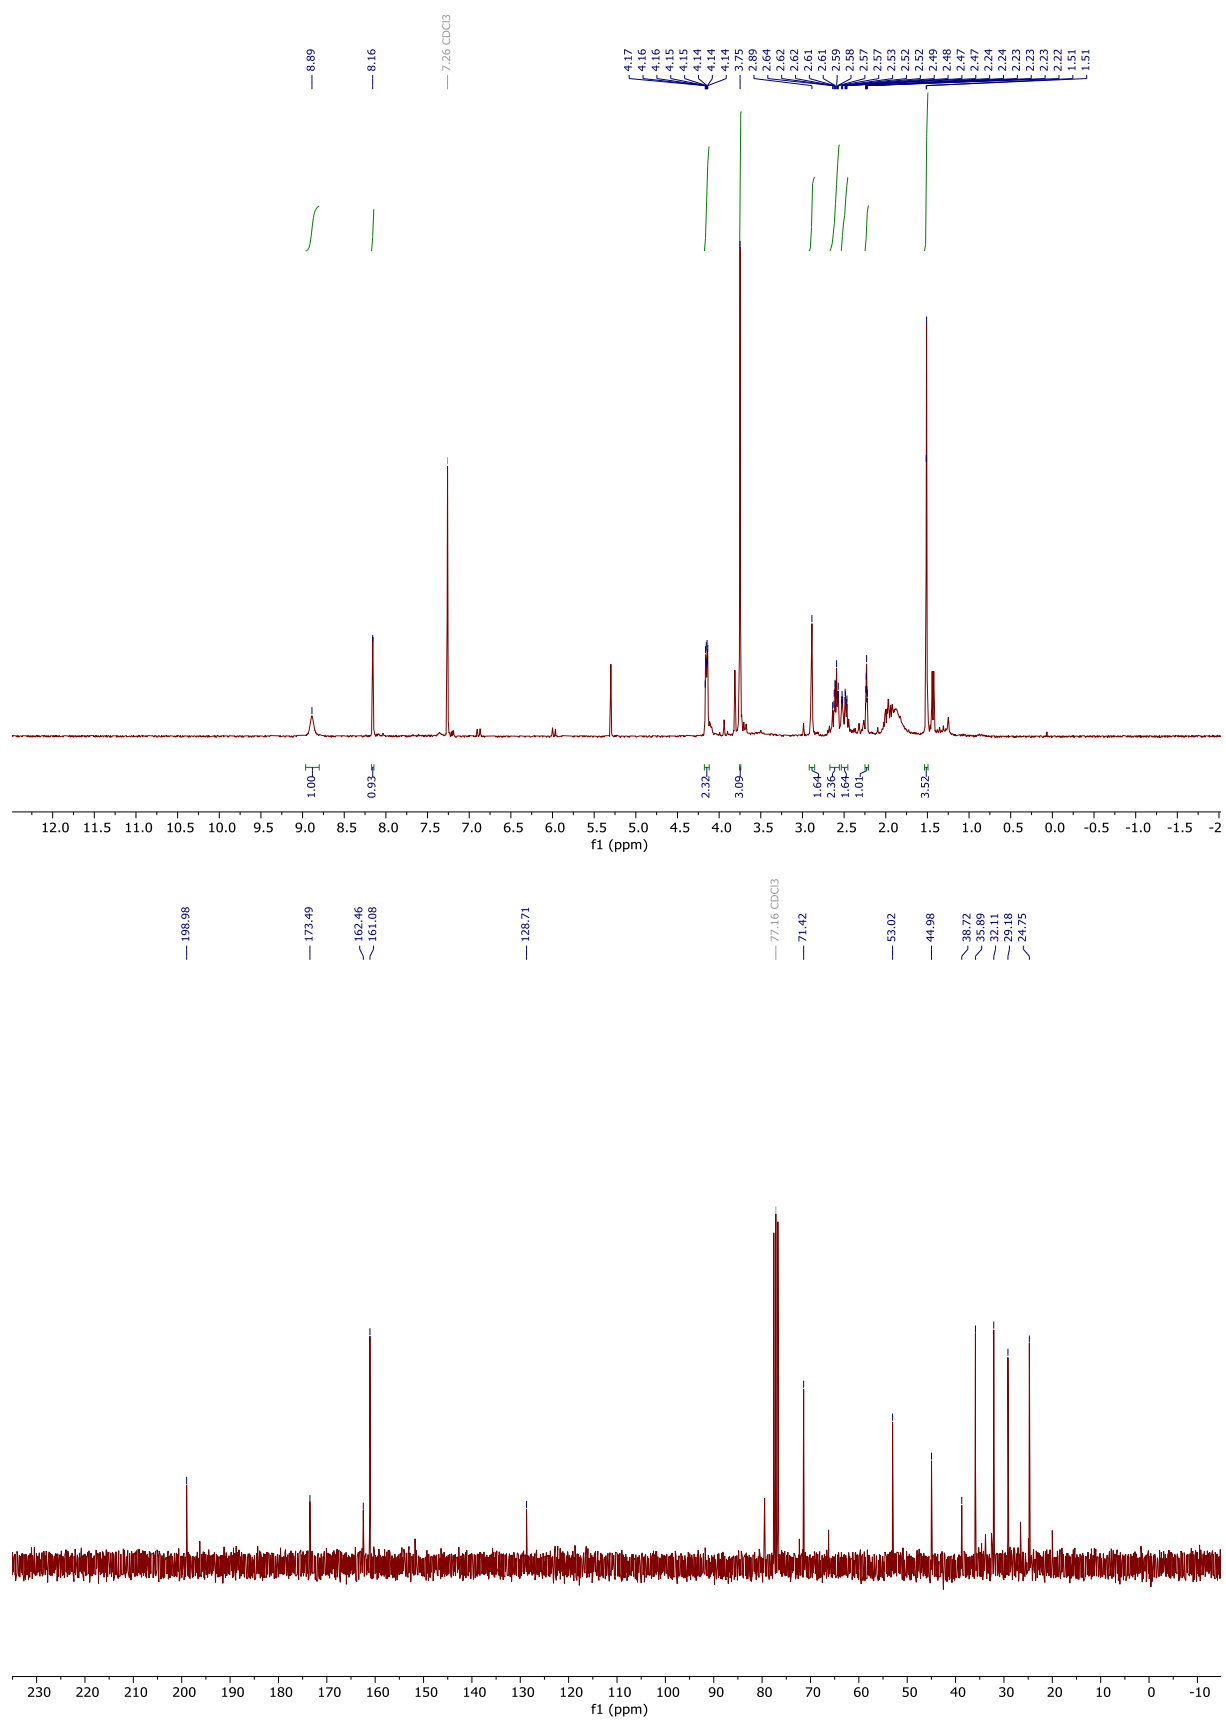

**Supplementary Fig. 52.** The <sup>1</sup>H-NMR (500 MHz) and <sup>13</sup>C-NMR (125 MHz) spectra of compound **S8** in CDCl<sub>3</sub>

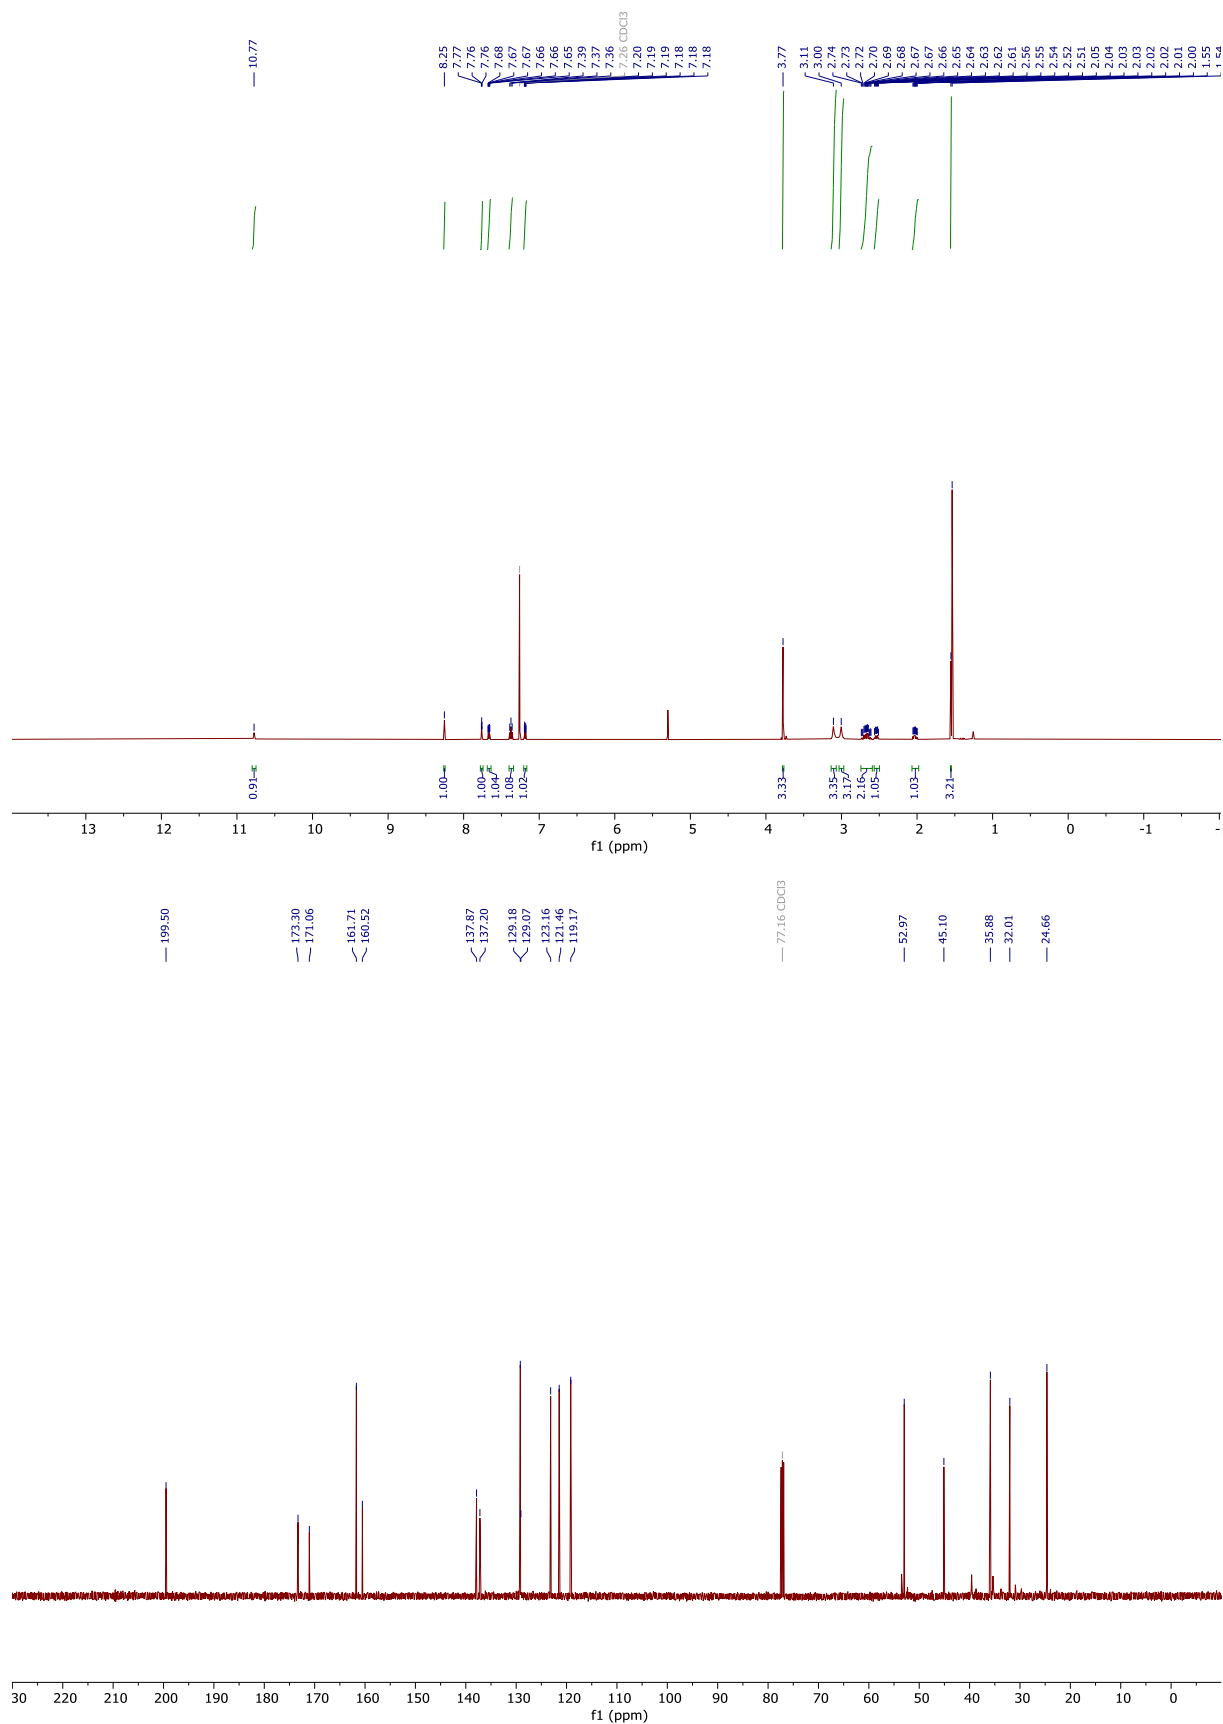

**Supplementary Fig. 53.** The <sup>1</sup>H-NMR (500 MHz) and <sup>13</sup>C-NMR (125 MHz) spectra of compound **19'S** in CDCl<sub>3</sub>

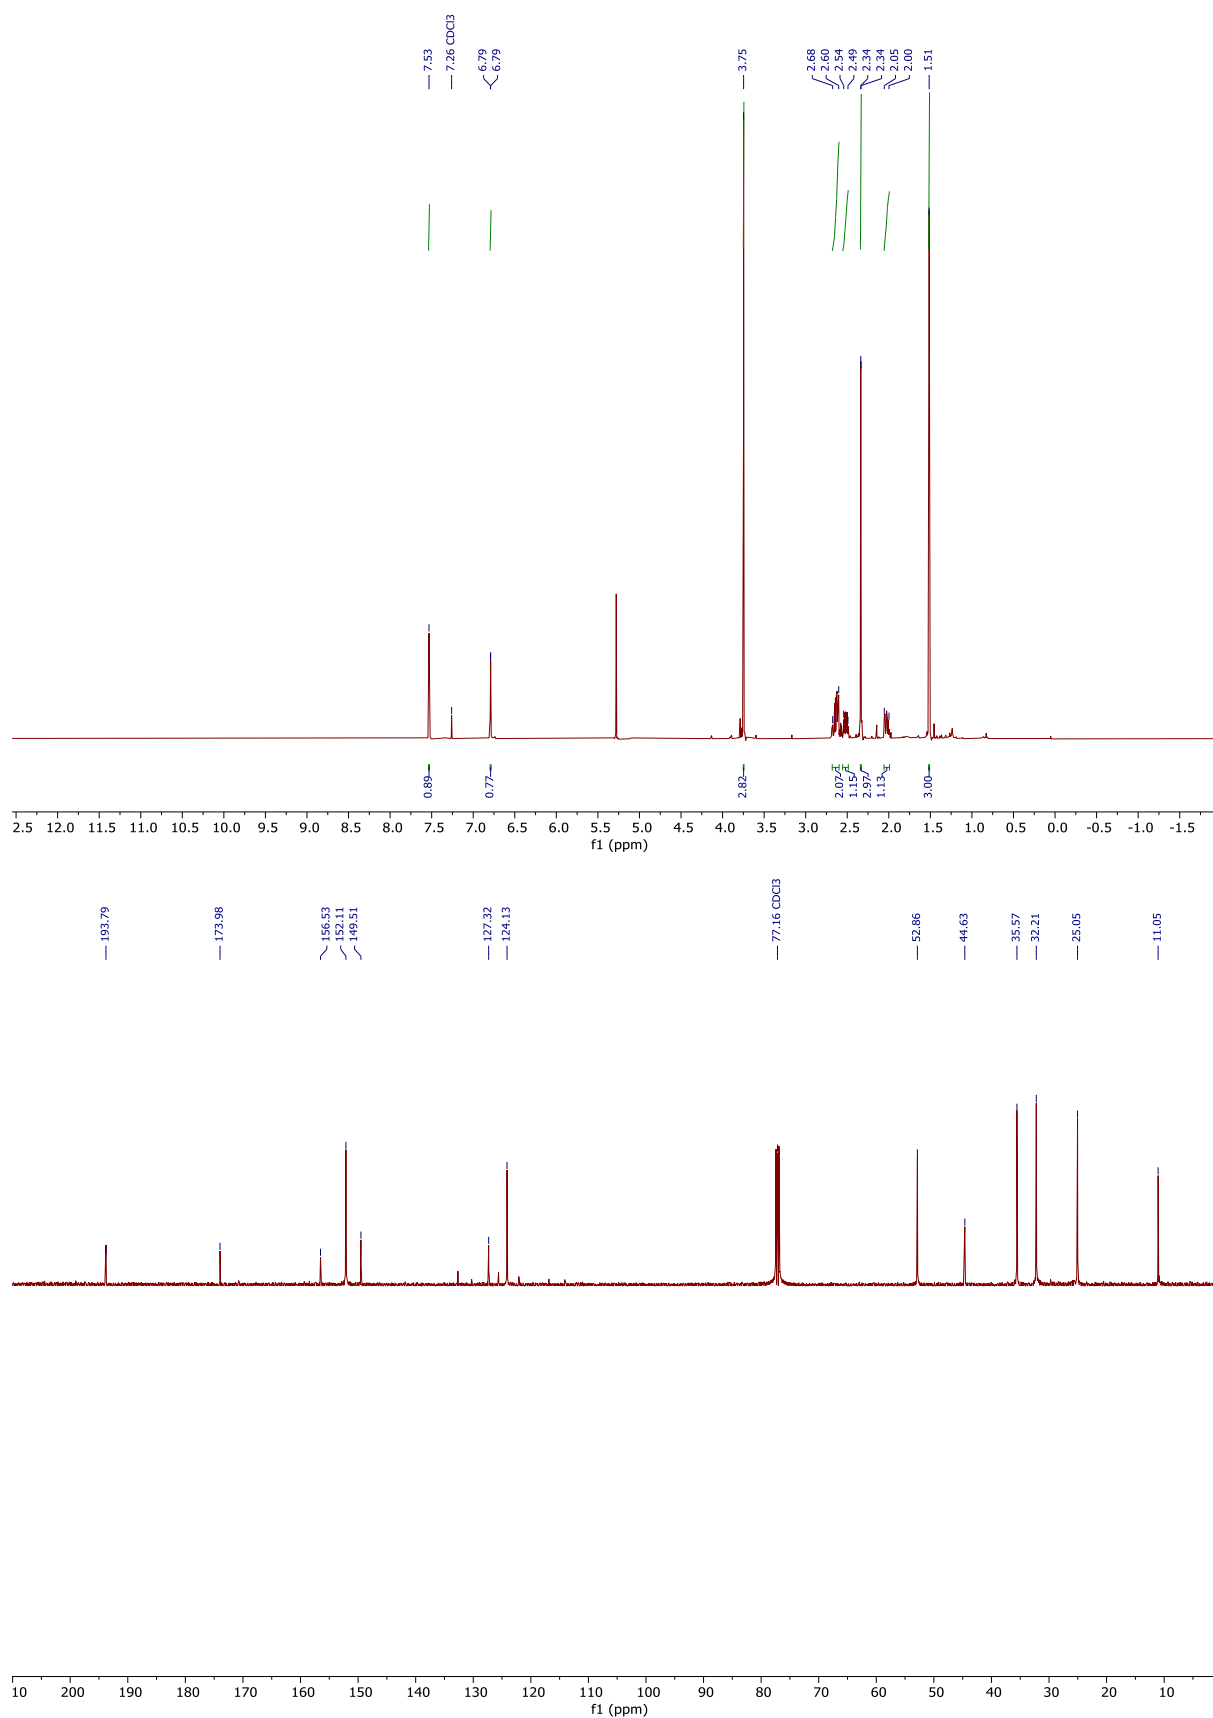

**Supplementary Fig. 54.** The <sup>1</sup>H-NMR (500 MHz) and <sup>13</sup>C-NMR (125 MHz) spectra of compound **24** in CDCl<sub>3</sub>

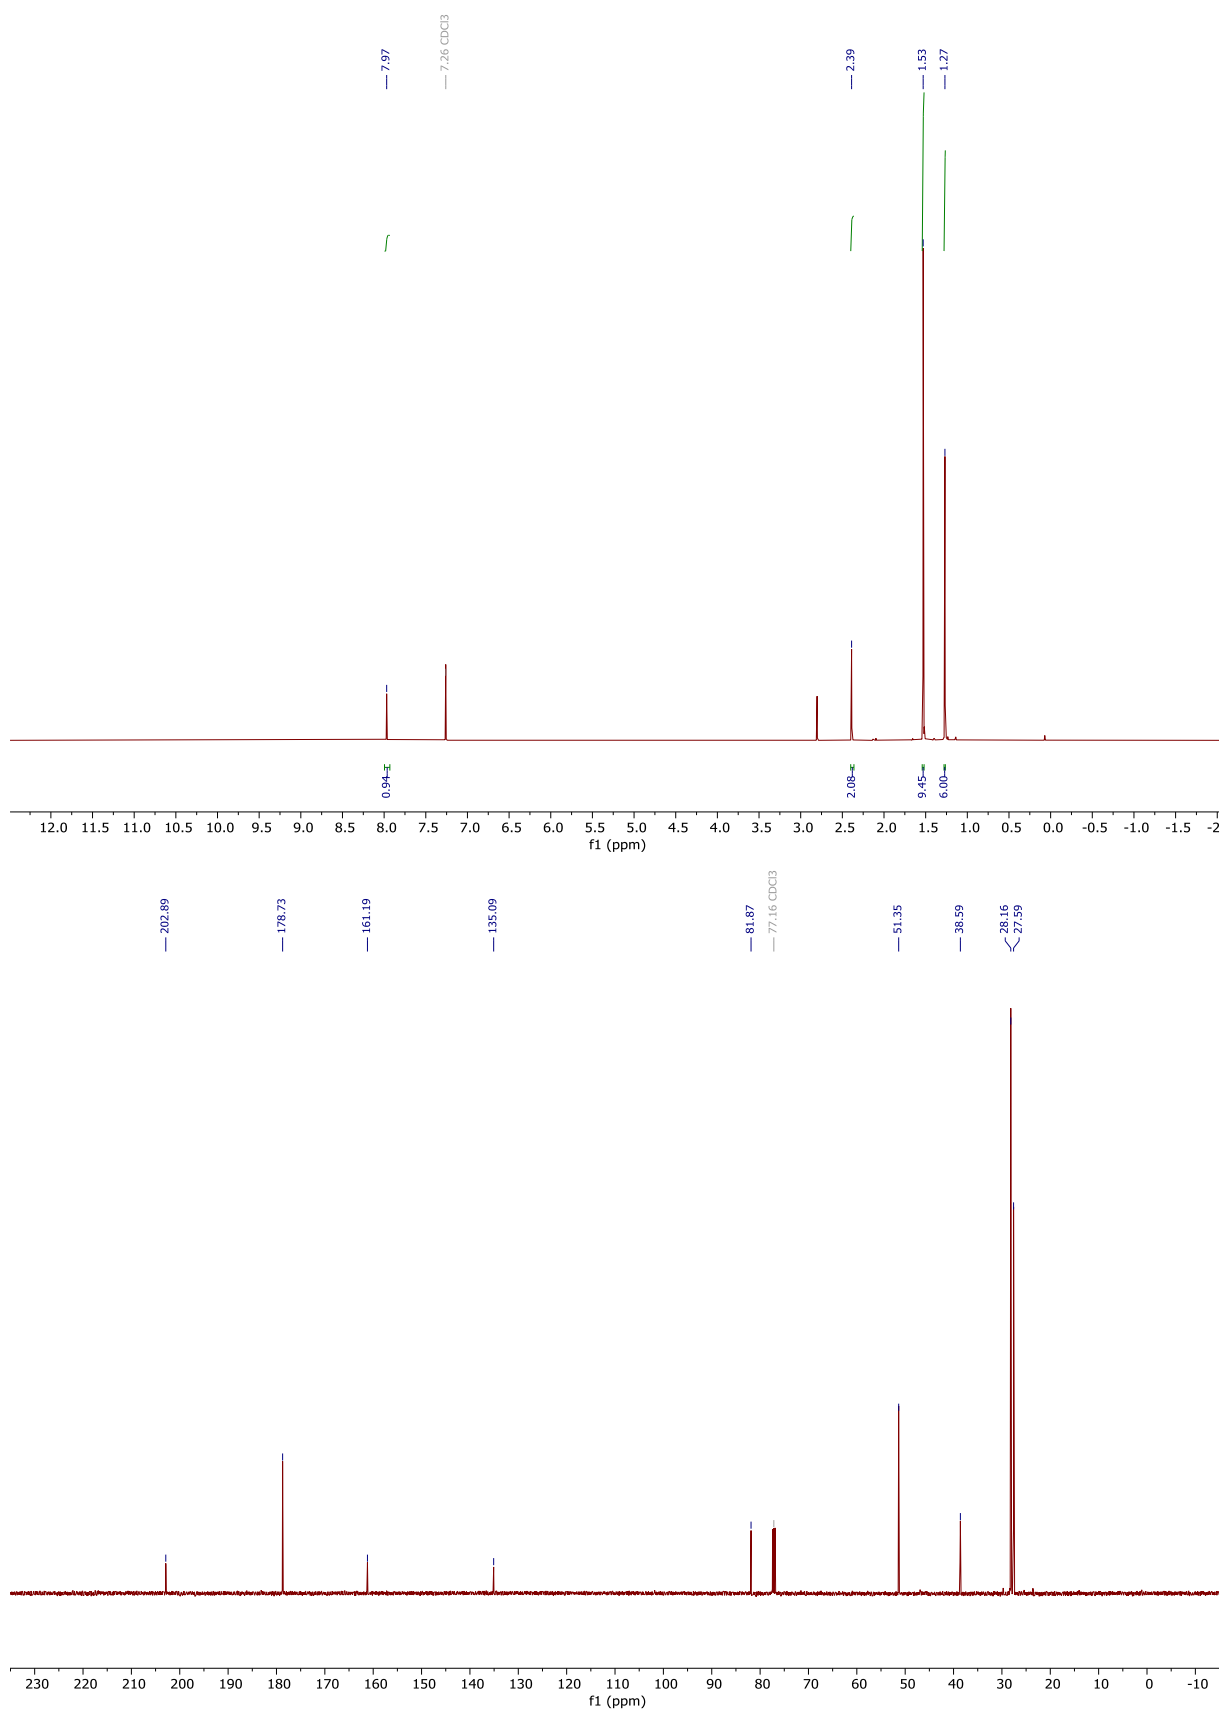

**Supplementary Fig. 55.** The <sup>1</sup>H-NMR (500 MHz) and <sup>13</sup>C-NMR (125 MHz) spectra of compound **26** in CDCl<sub>3</sub>

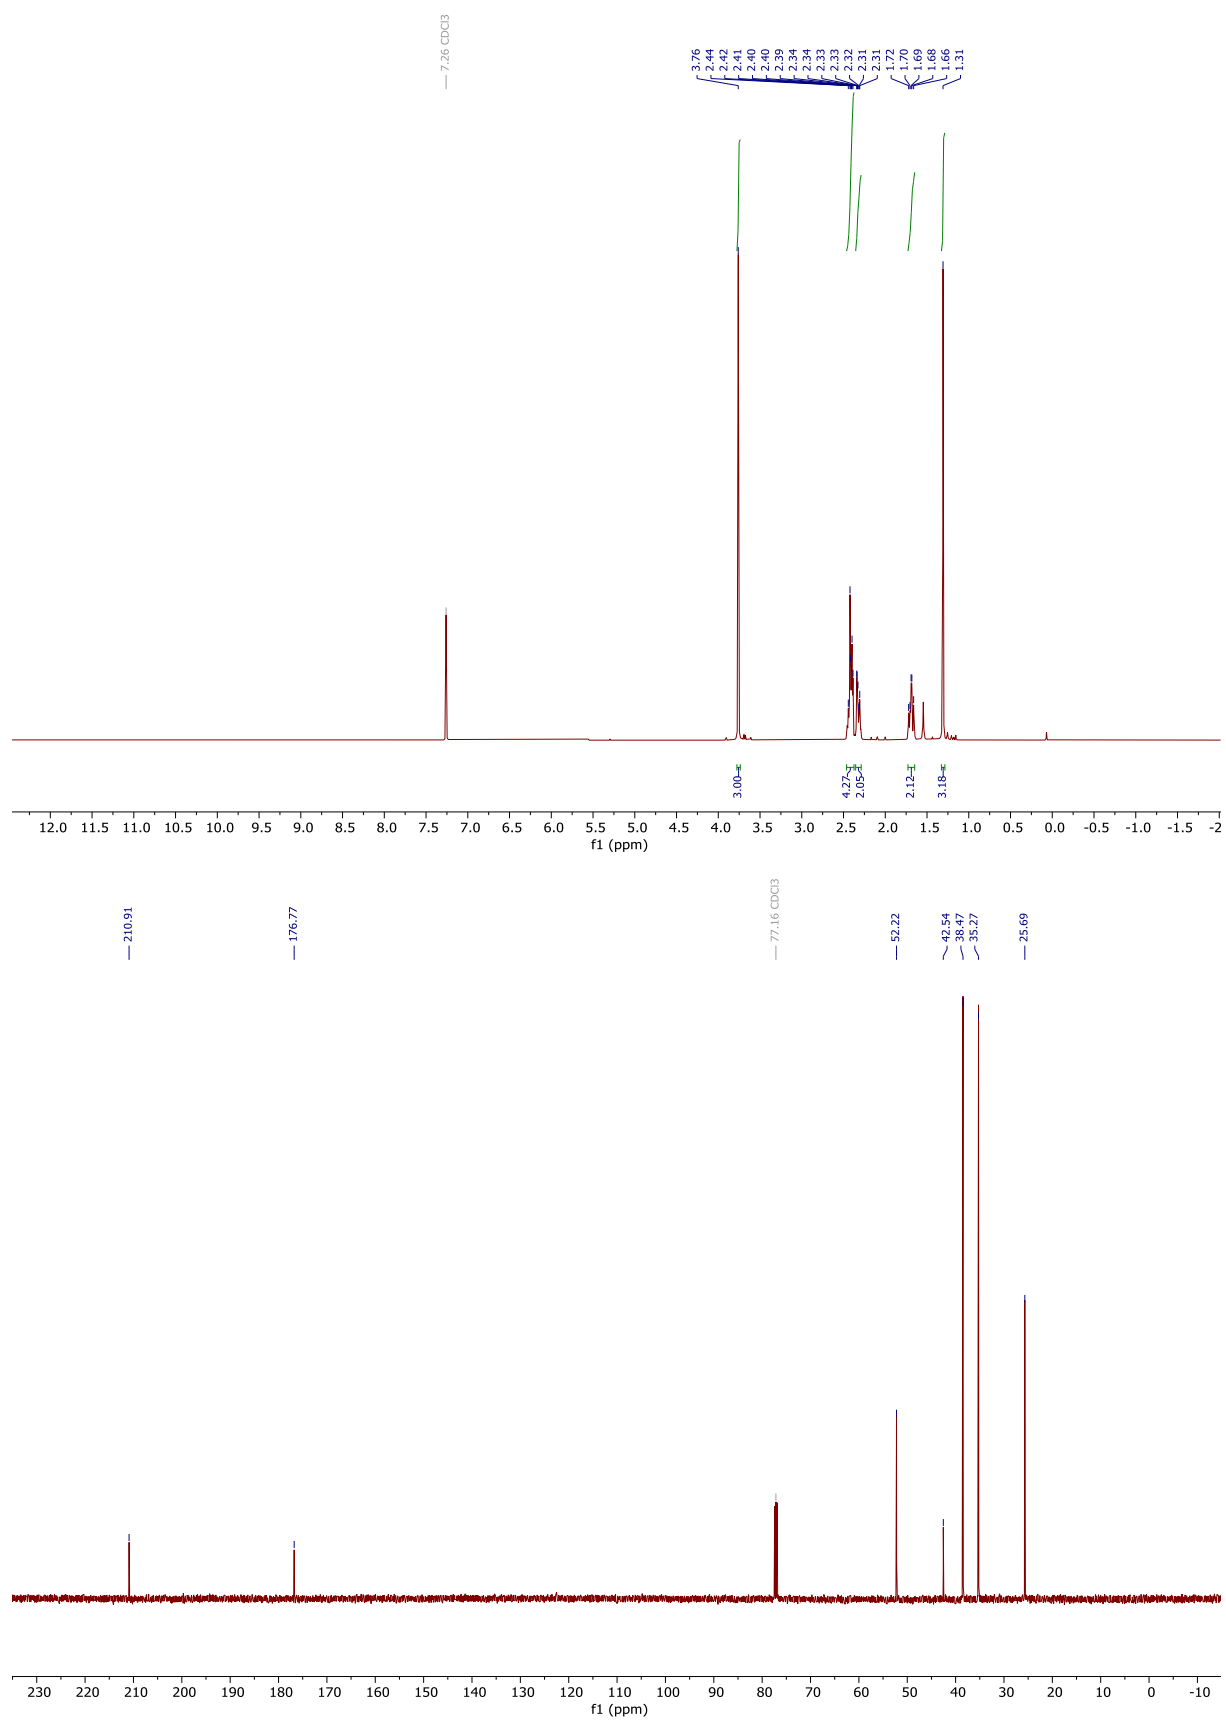

**Supplementary Fig. 56.** The <sup>1</sup>H-NMR (500 MHz) and <sup>13</sup>C-NMR (125 MHz) spectra of compound S10 in CDCl<sub>3</sub>

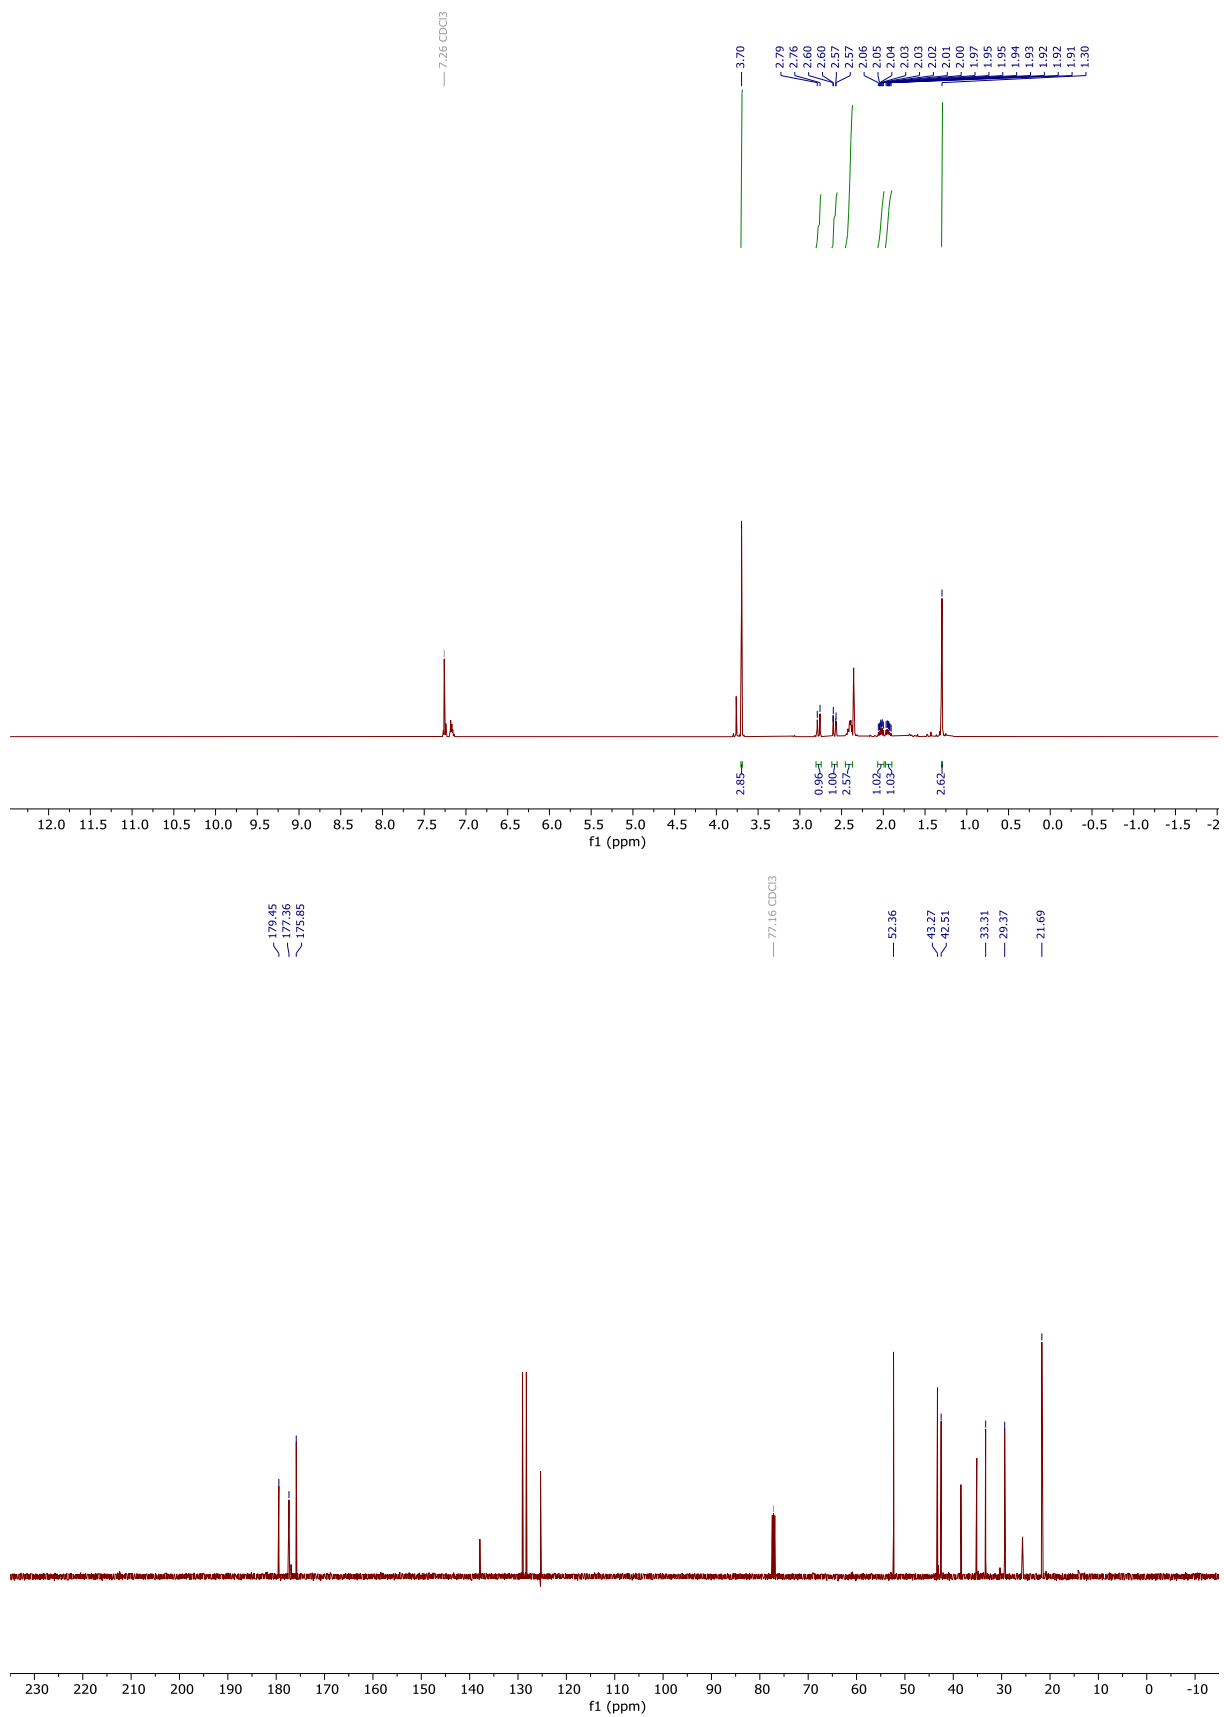

**Supplementary Fig. 57.** The <sup>1</sup>H-NMR (500 MHz) and <sup>13</sup>C-NMR (125 MHz) spectra of compound **S11** in CDCl<sub>3</sub>



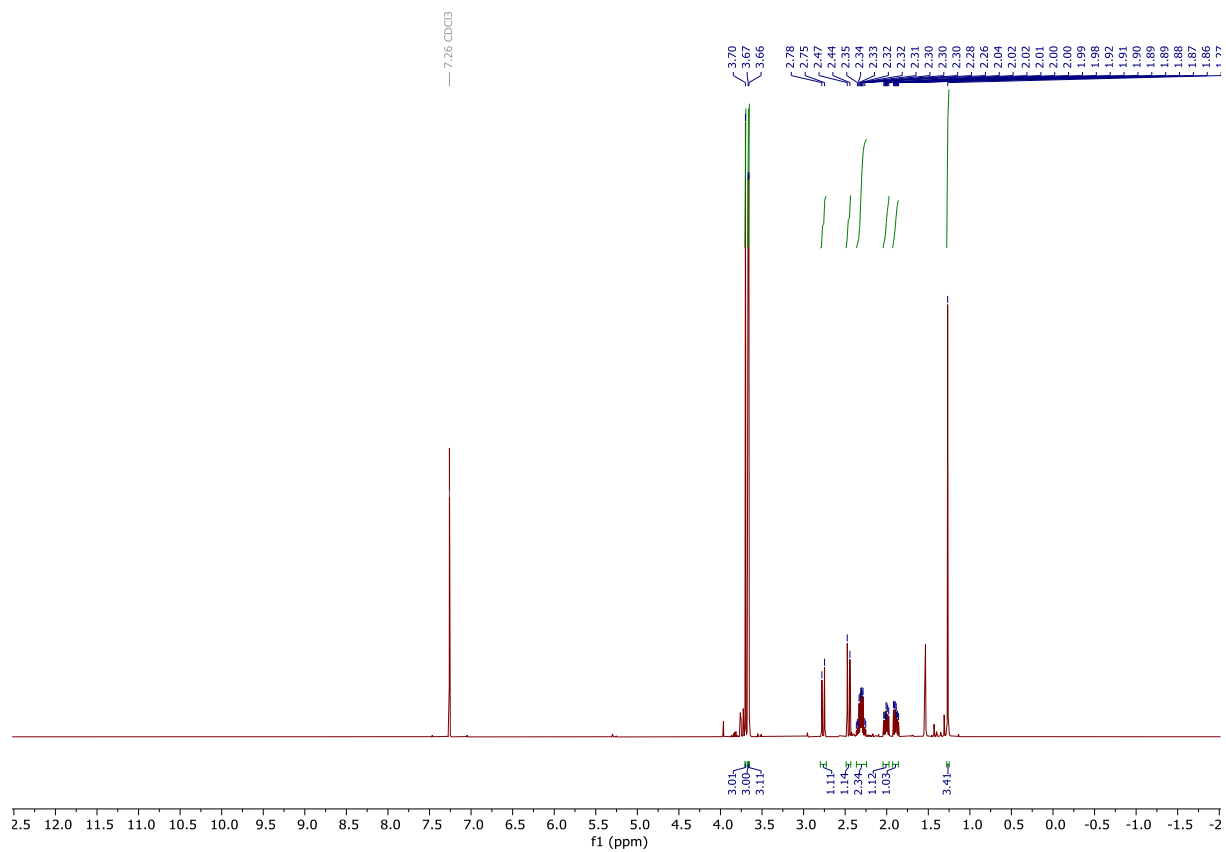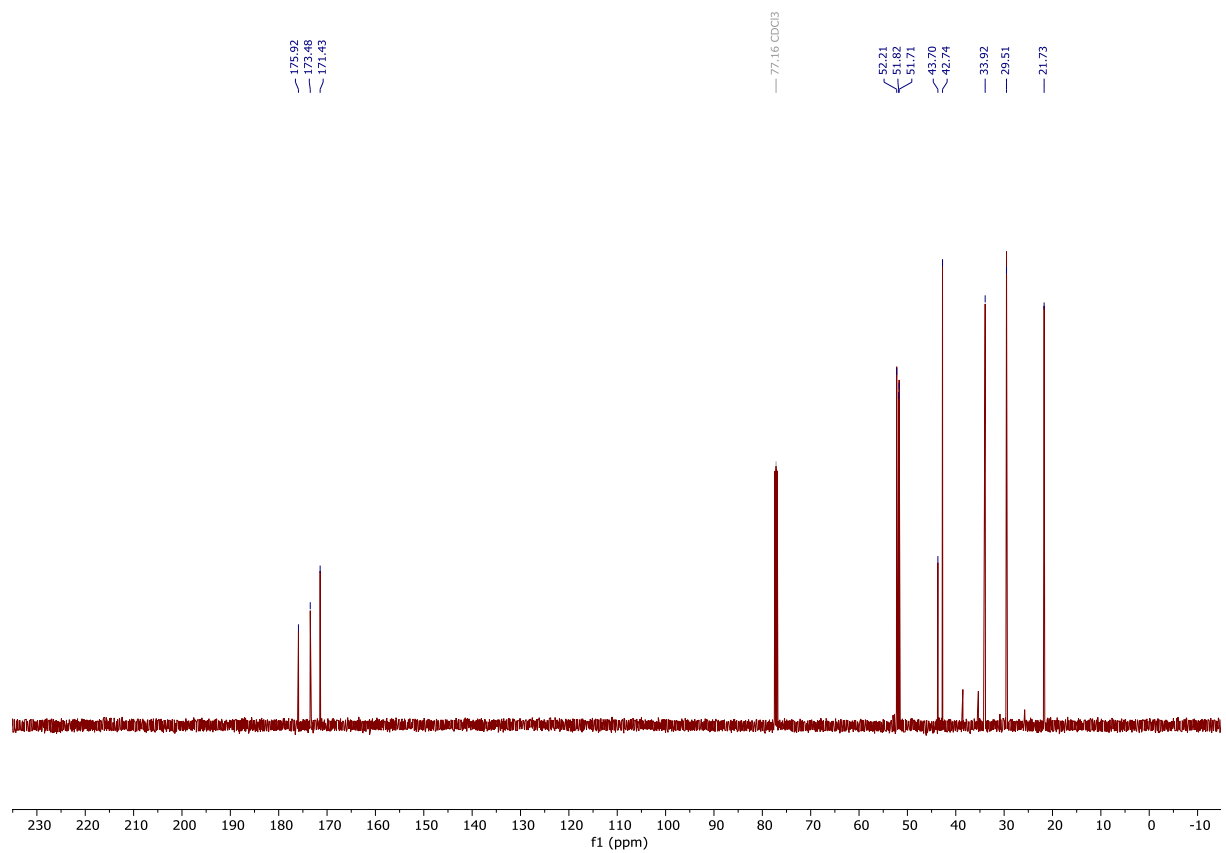

**Supplementary Fig. 58.** The <sup>1</sup>H-NMR (500 MHz) and <sup>13</sup>C-NMR (125 MHz) spectra of compound **S12** in CDCl<sub>3</sub>

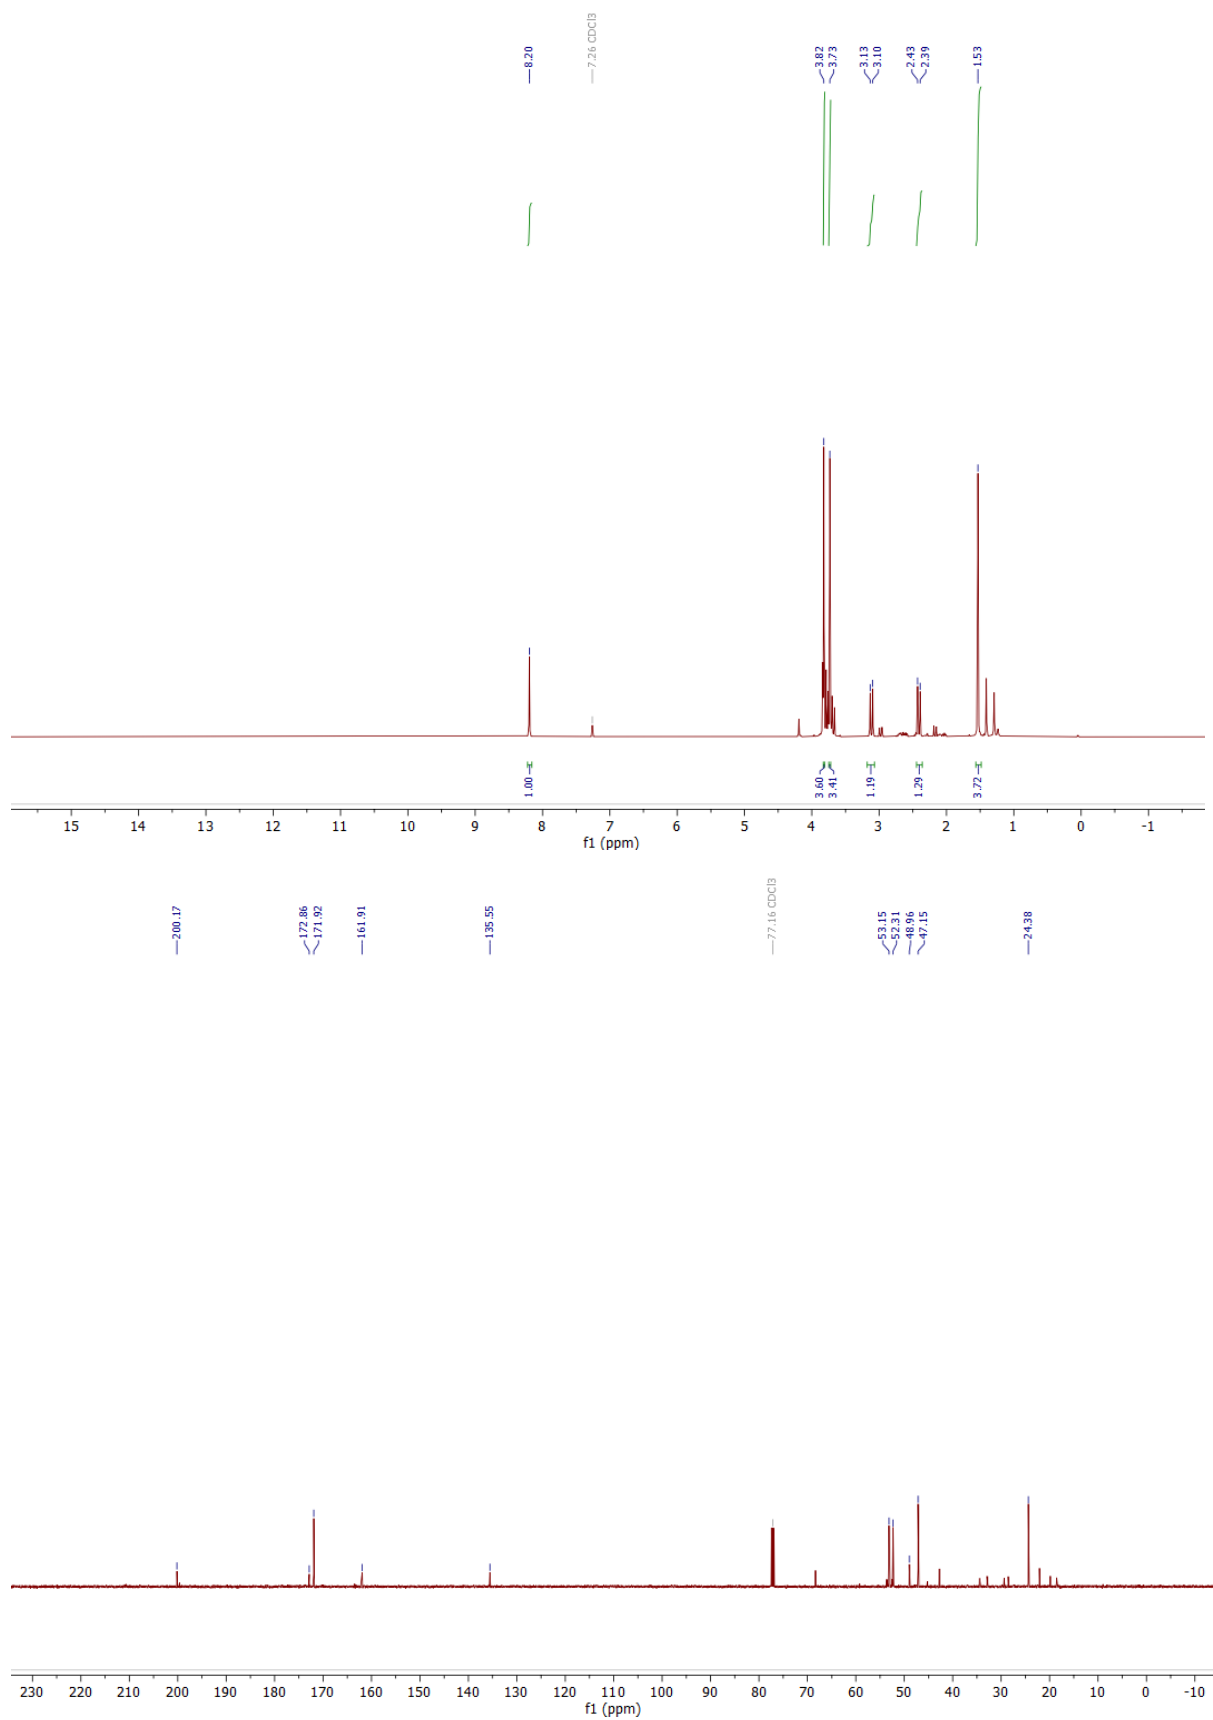

**Supplementary Fig. 59.** The <sup>1</sup>H-NMR (500 MHz) and <sup>13</sup>C-NMR (125 MHz) spectra of compound S15 in CDCl<sub>3</sub>

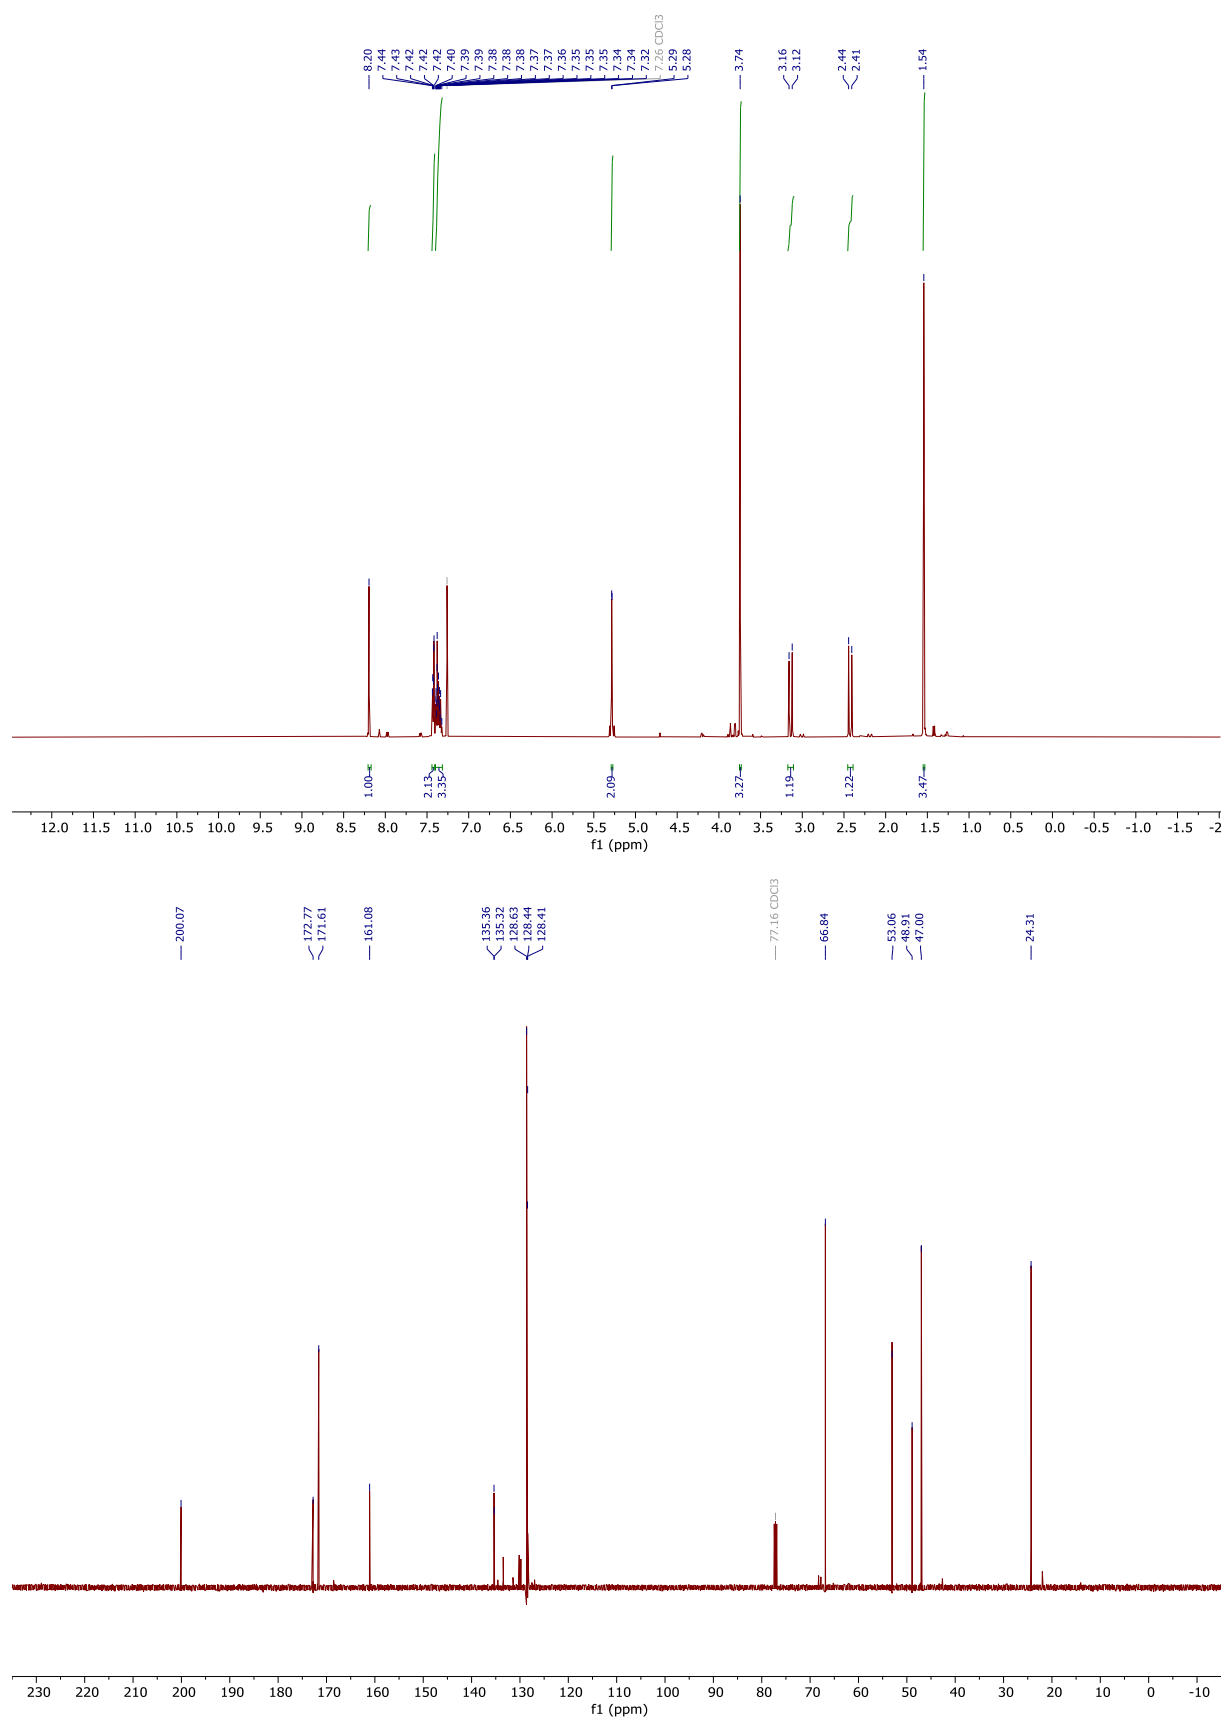

**Supplementary Fig. 60.** The <sup>1</sup>H-NMR (500 MHz) and <sup>13</sup>C-NMR (125 MHz) spectra of compound 27 in CDCl<sub>3</sub>

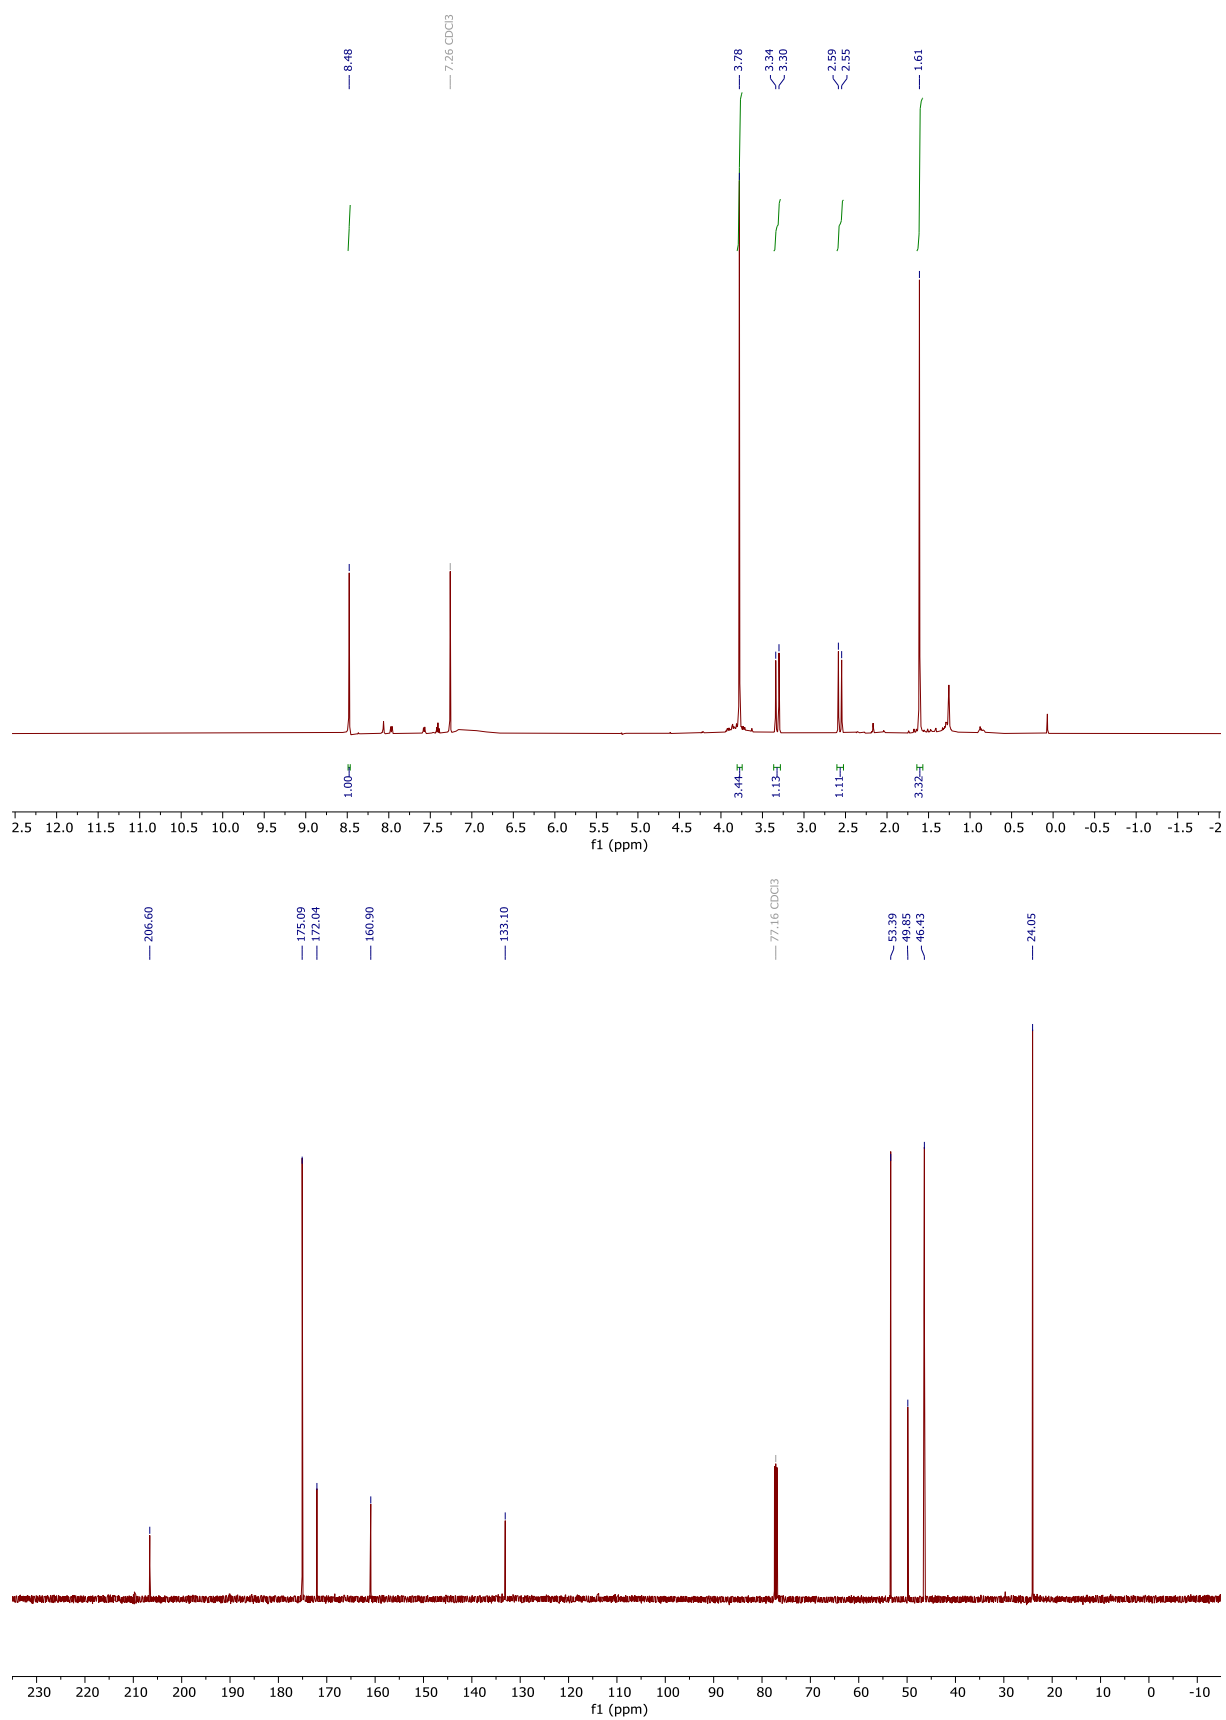

**Supplementary Fig. 61.** The <sup>1</sup>H-NMR (500 MHz) and <sup>13</sup>C-NMR (125 MHz) spectra of compound S16 in CDCl<sub>3</sub>

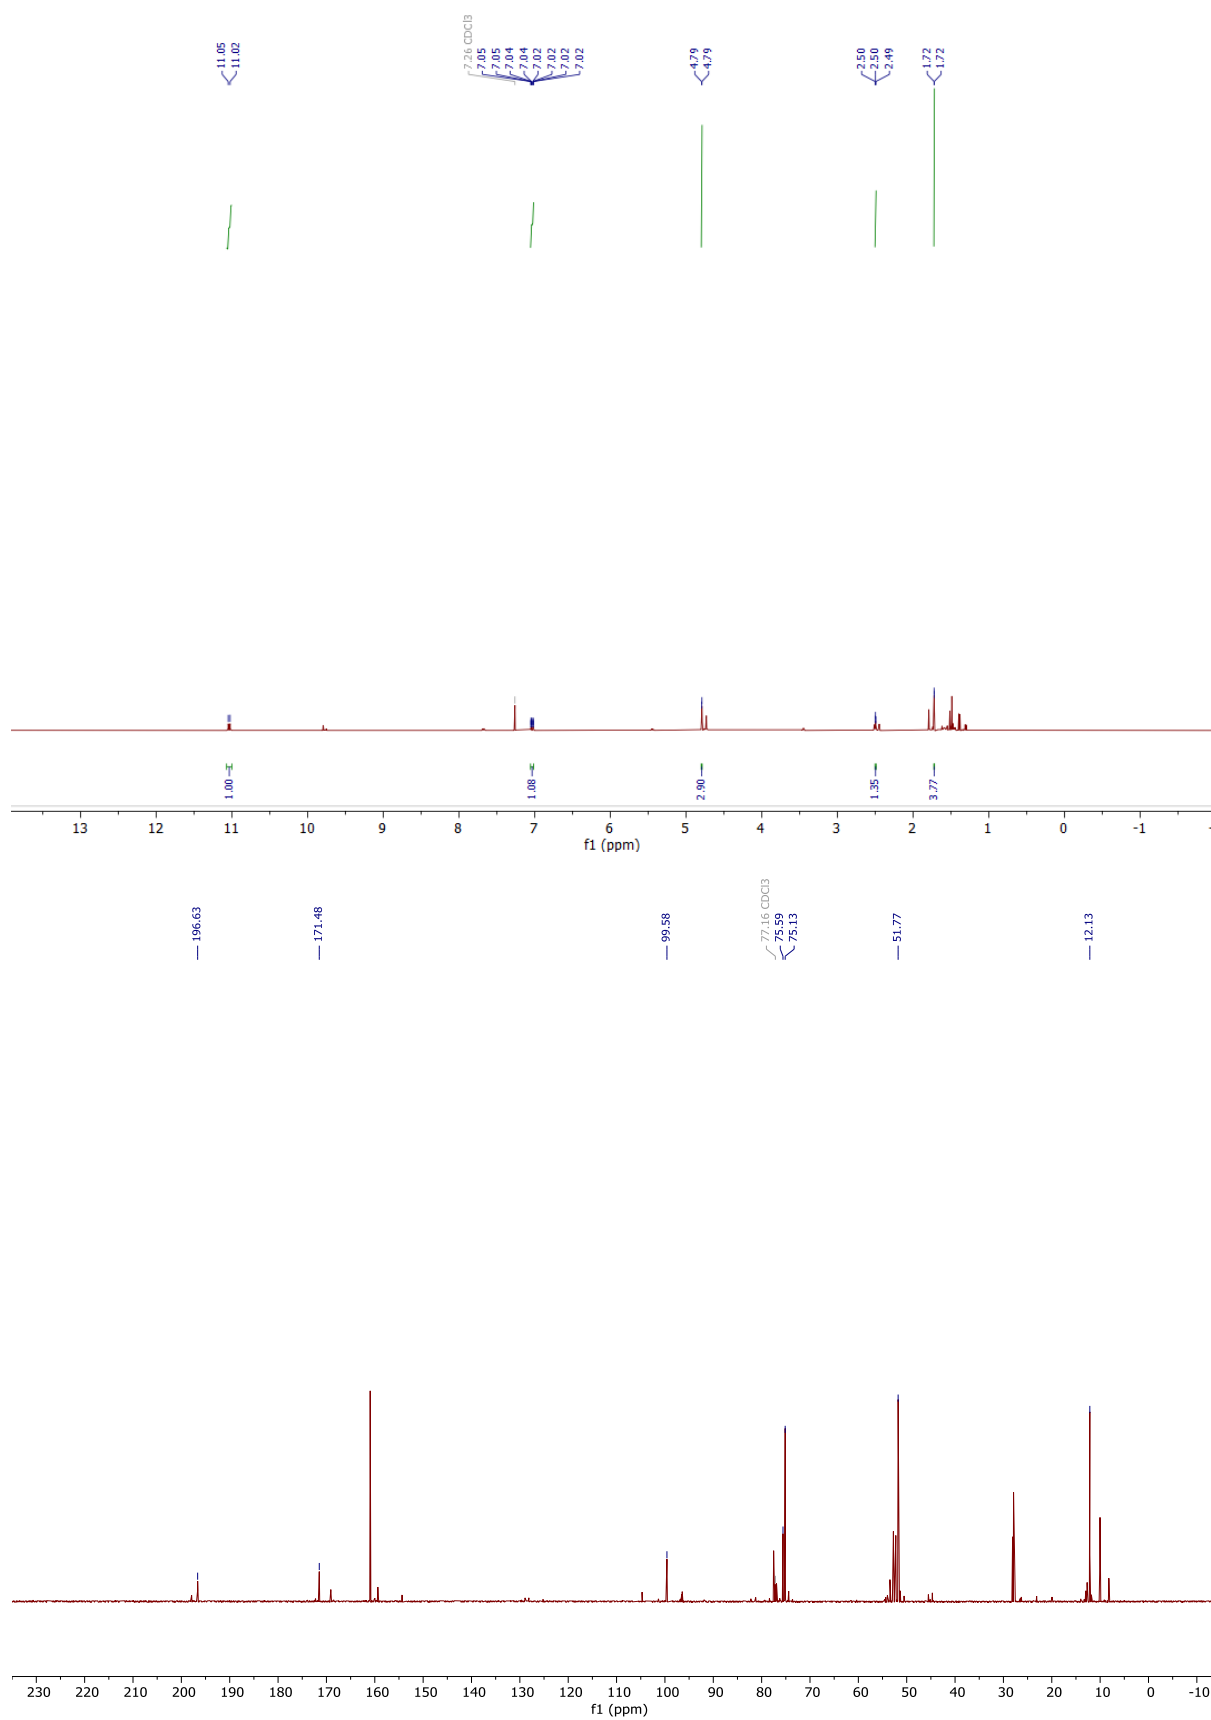

**Supplementary Fig. 62.** The <sup>1</sup>H-NMR (500 MHz) and <sup>13</sup>C-NMR (125 MHz) spectra of compound S21 in CDCl<sub>3</sub>

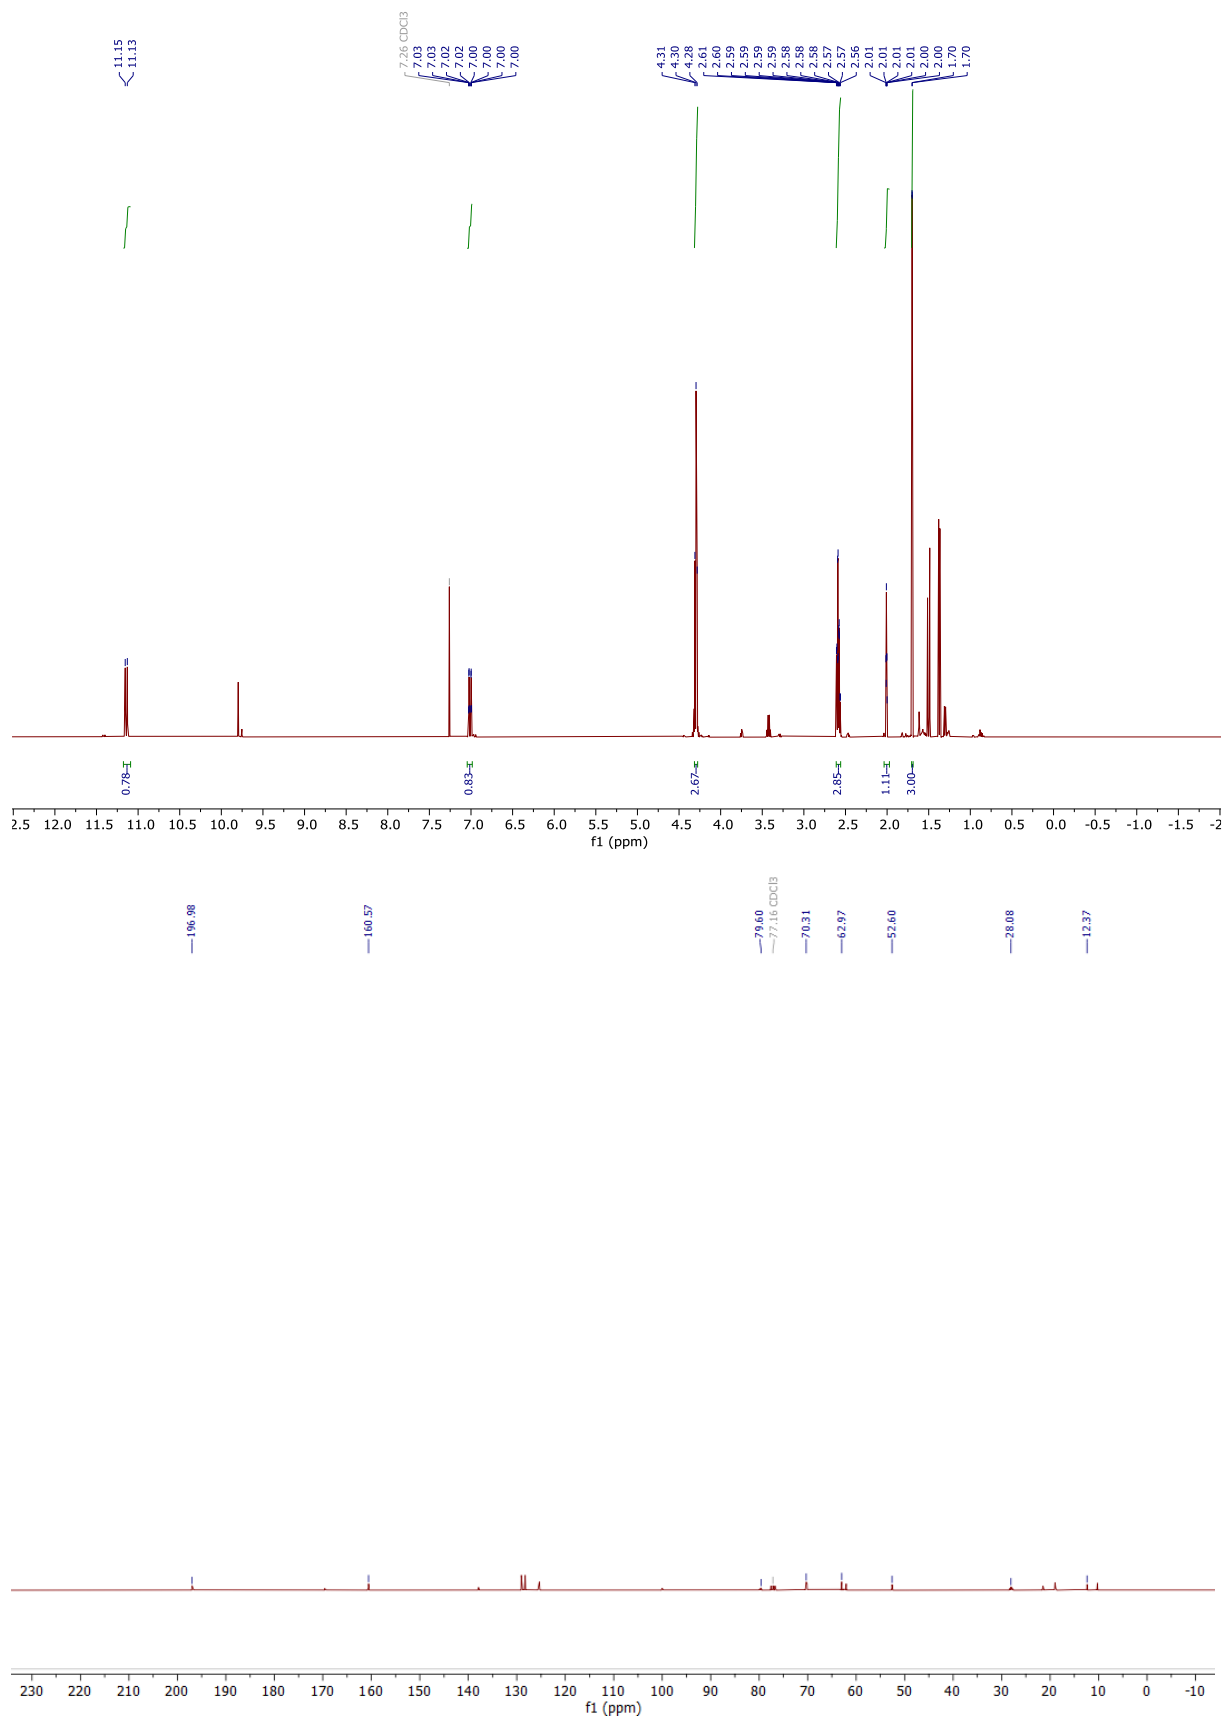

**Supplementary Fig. 63.** The <sup>1</sup>H-NMR (500 MHz) and <sup>13</sup>C-NMR (125 MHz) spectra of compound S2m in CDCl<sub>3</sub>

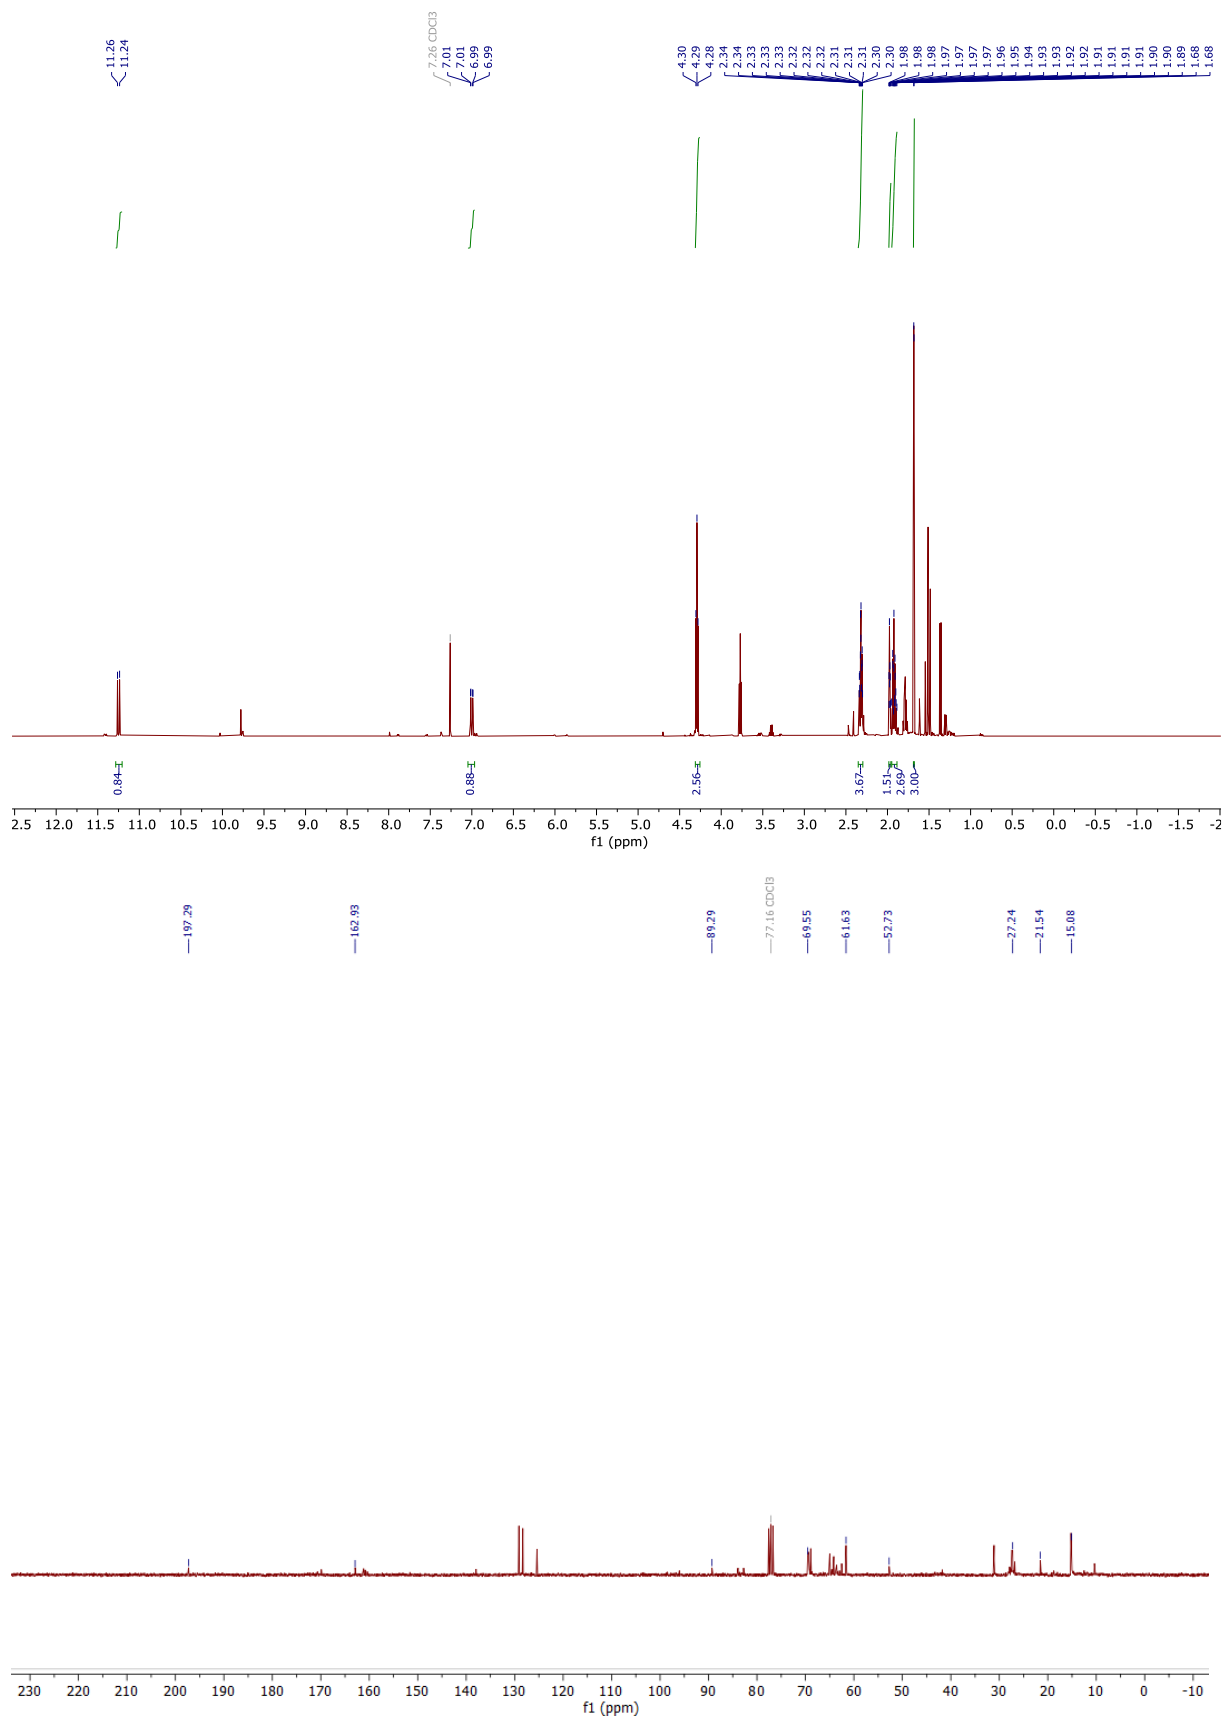

**Supplementary Fig. 64.** The <sup>1</sup>H-NMR (300 MHz) and <sup>13</sup>C-NMR (75 MHz) spectra of compound S2n in CDCl<sub>3</sub>

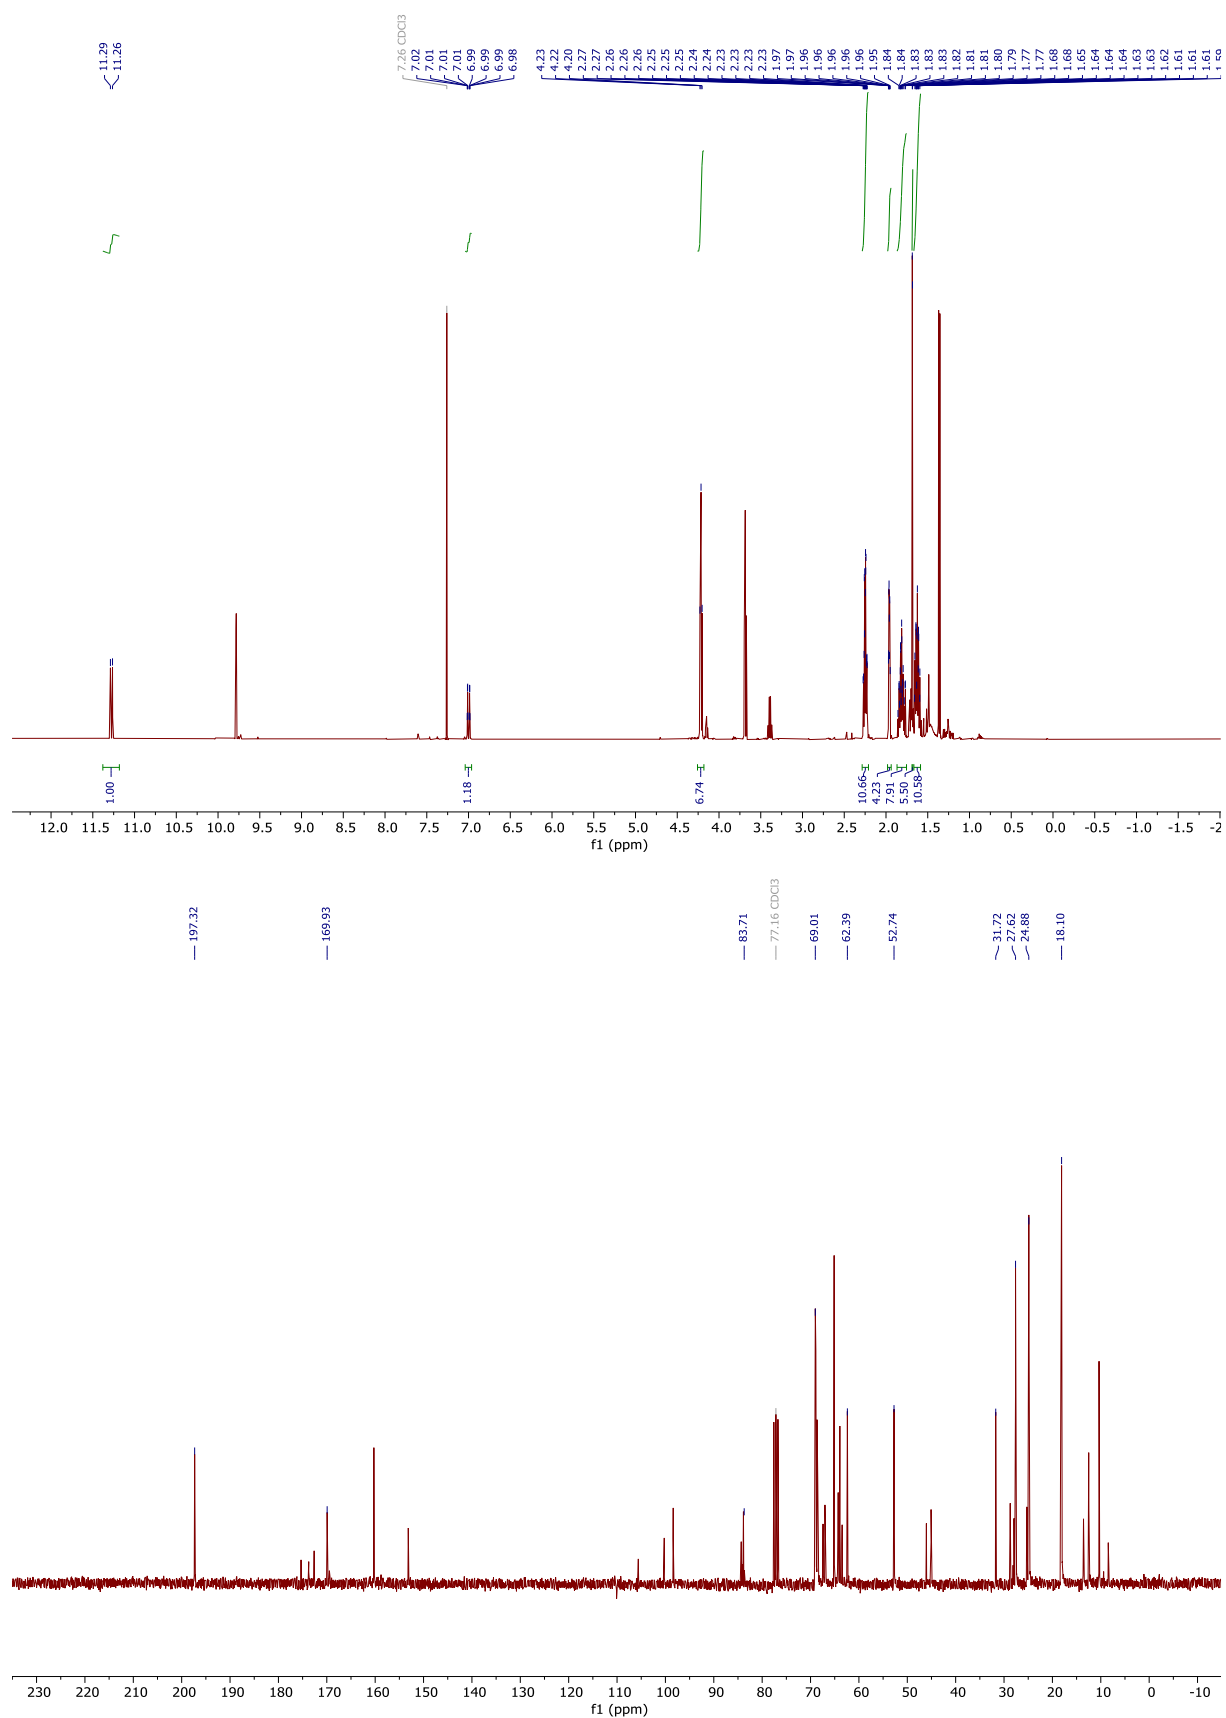

**Supplementary Fig. 65.** The  $^1\text{H}$ -NMR (300 MHz) and  $^{13}\text{C}$ -NMR (75 MHz) spectra of compound **S2o** in  $\text{CDCl}_3$



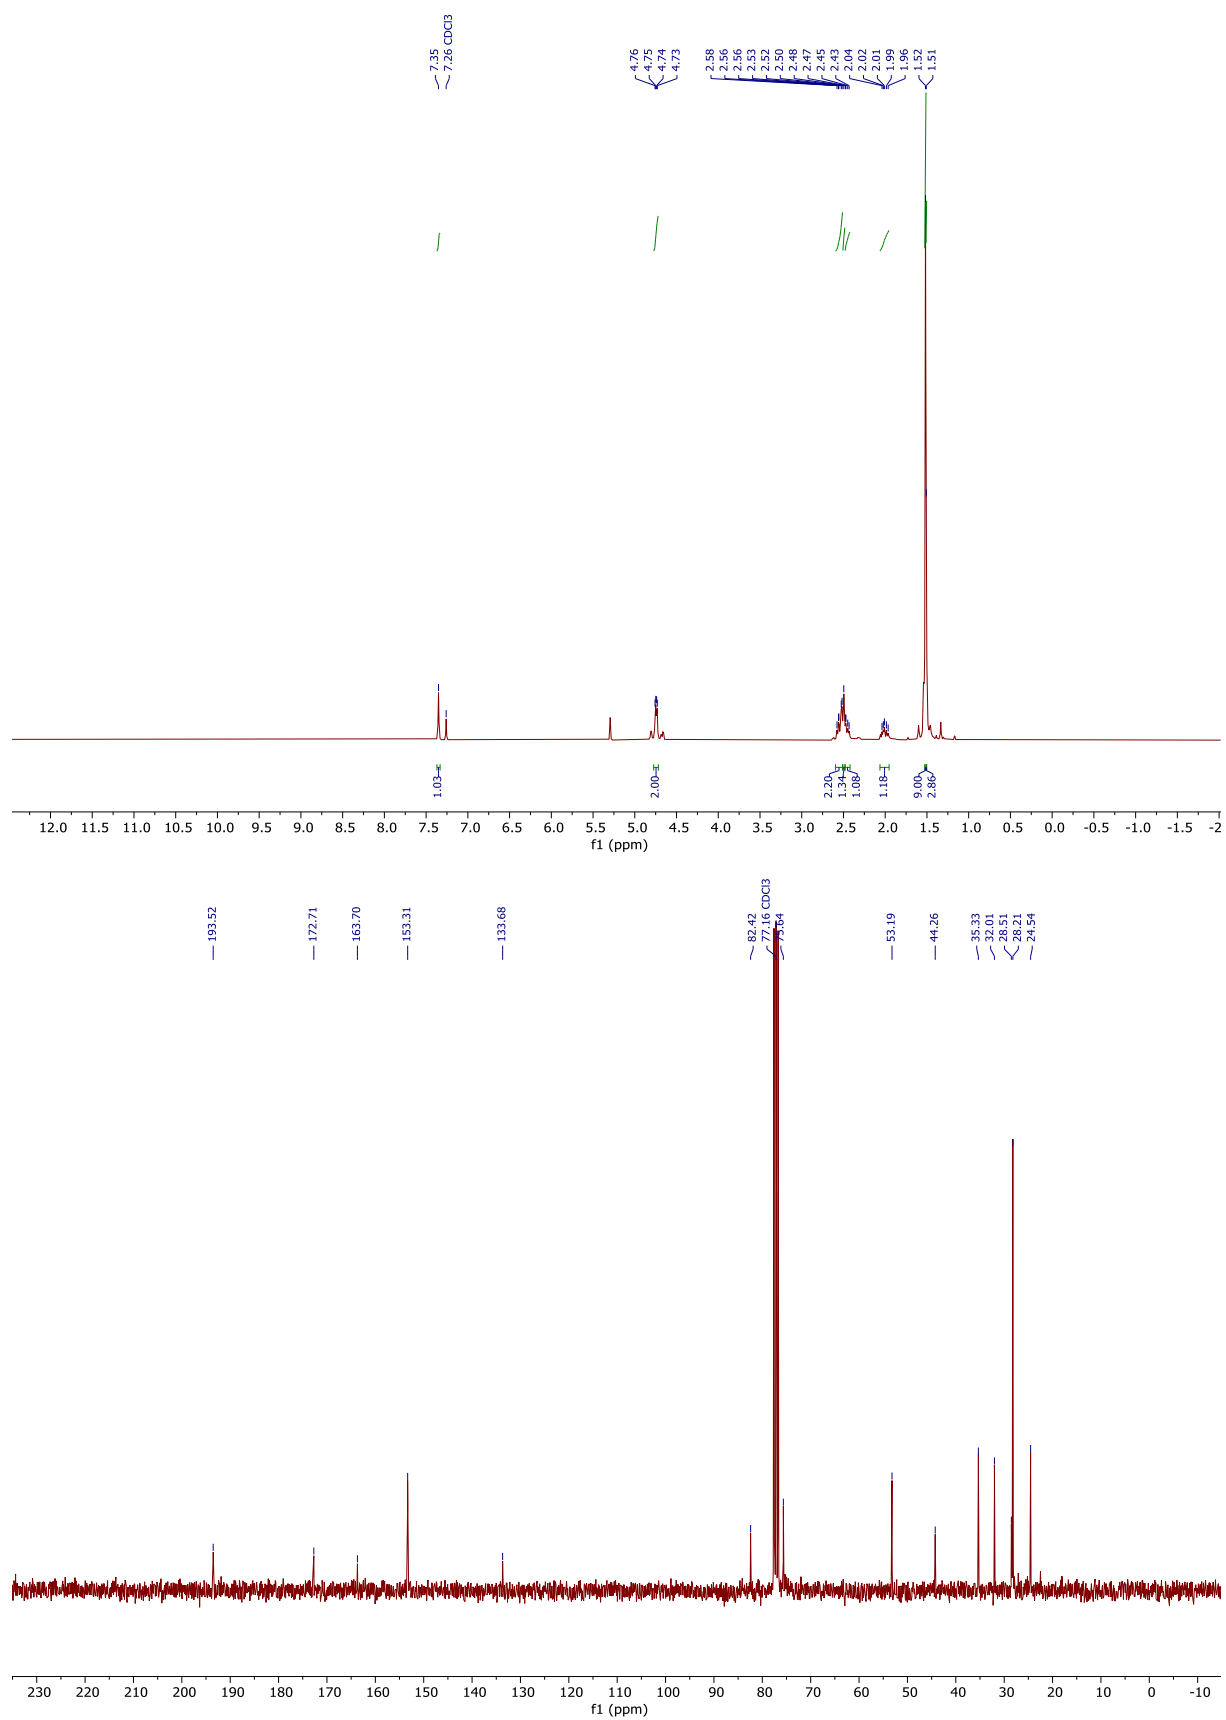

**Supplementary Fig. 66.** The <sup>1</sup>H-NMR (300 MHz) and <sup>13</sup>C-NMR (75 MHz) spectra of compound **28R/28S** in CDCl<sub>3</sub>

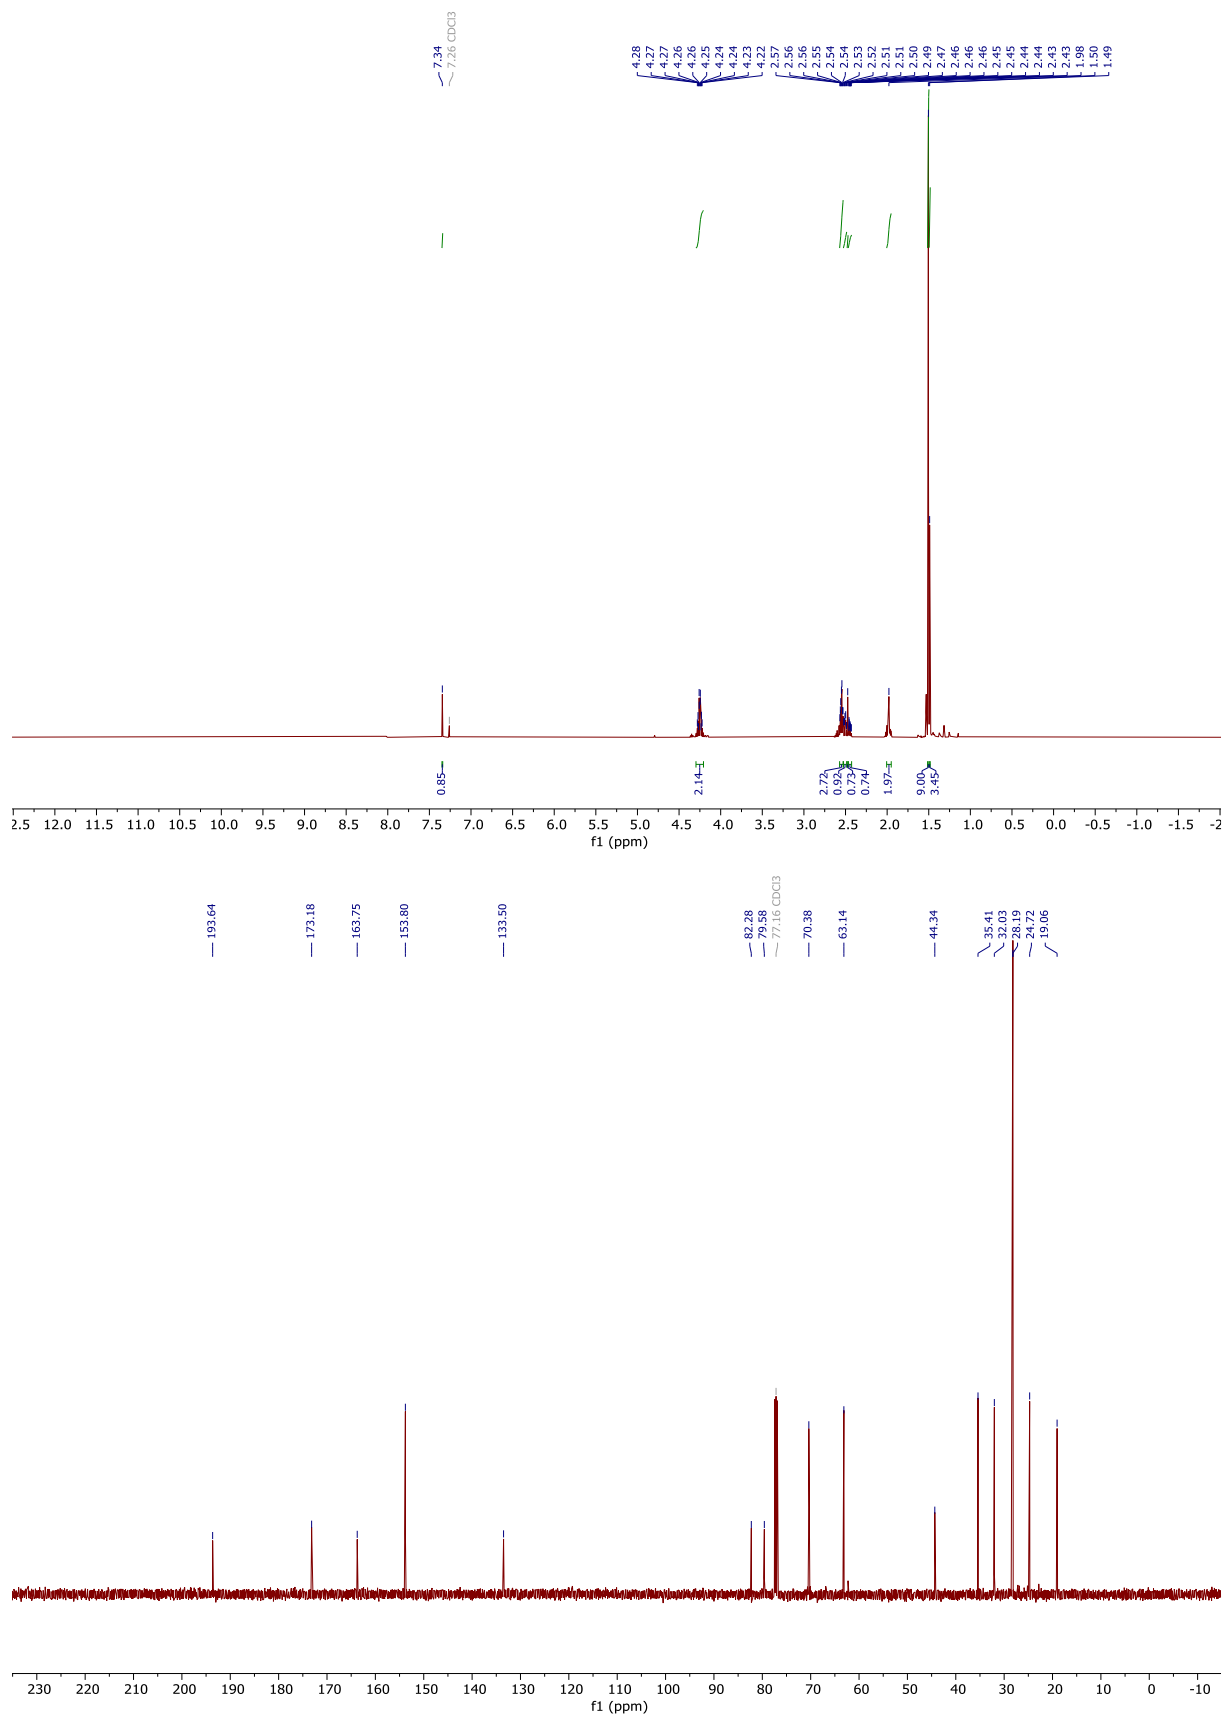

**Supplementary Fig. 67.** The <sup>1</sup>H-NMR (300 MHz) and <sup>13</sup>C-NMR (75 MHz) spectra of compound **29S** in CDCl<sub>3</sub>

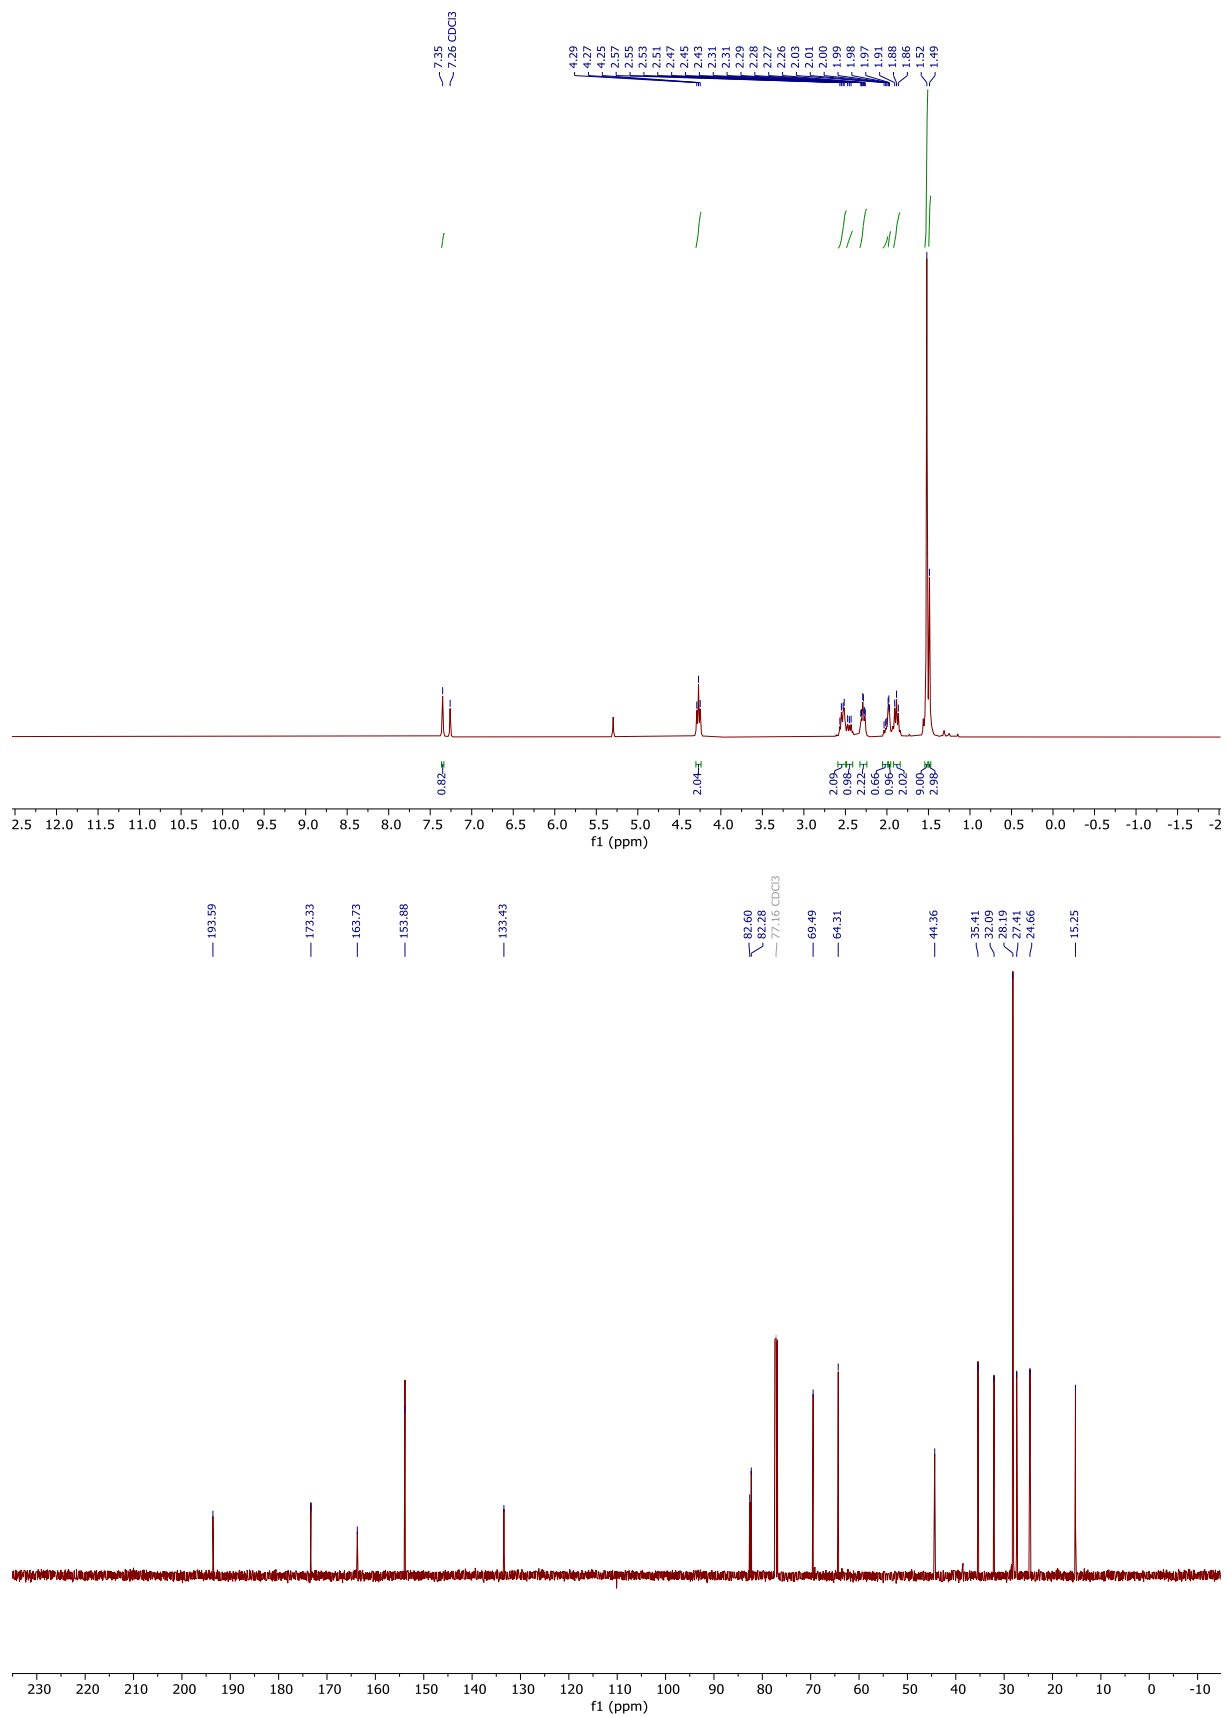

**Supplementary Fig. 68.** The <sup>1</sup>H-NMR (300 MHz) and <sup>13</sup>C-NMR (75 MHz) spectra of compound **30S** in CDCl<sub>3</sub>

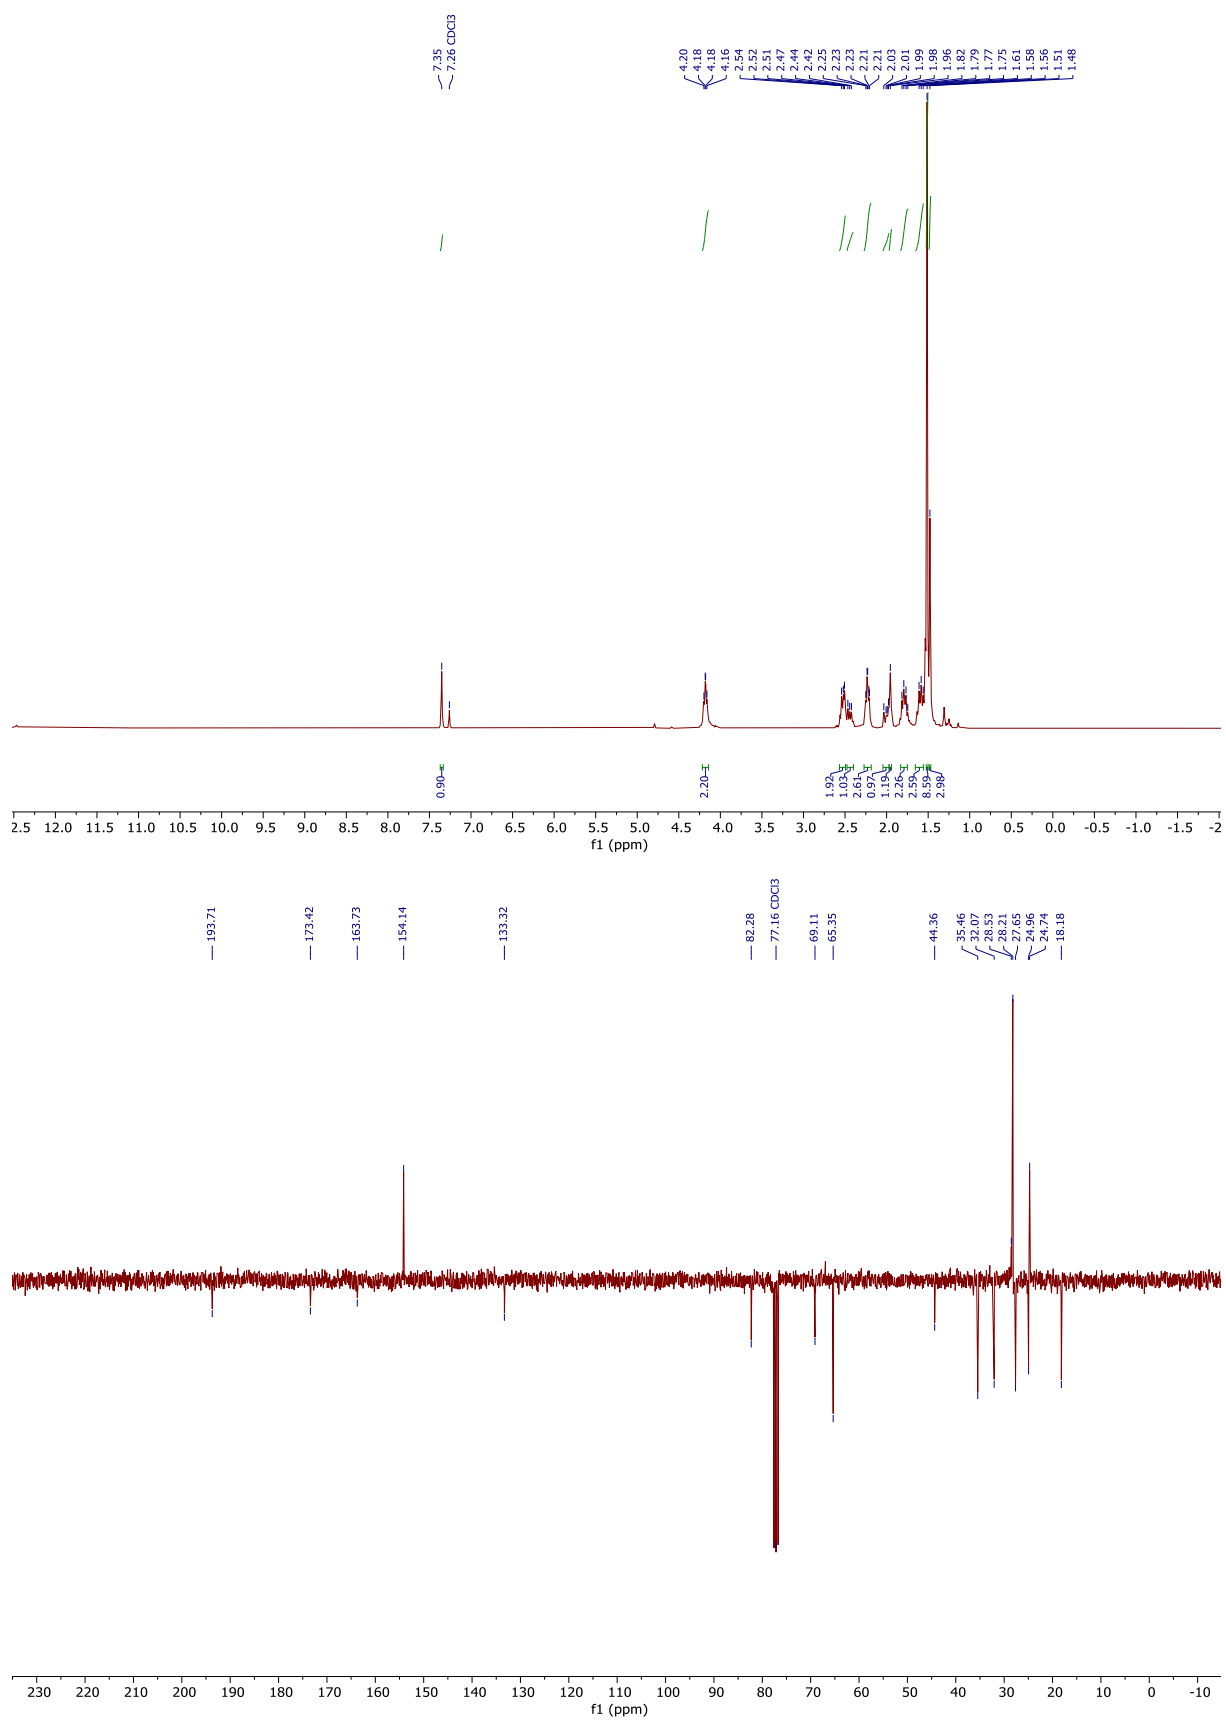

**Supplementary Fig. 69.** The <sup>1</sup>H-NMR (300 MHz) and APT-NMR (75 MHz) spectra of compound 31S in CDCl<sub>3</sub>

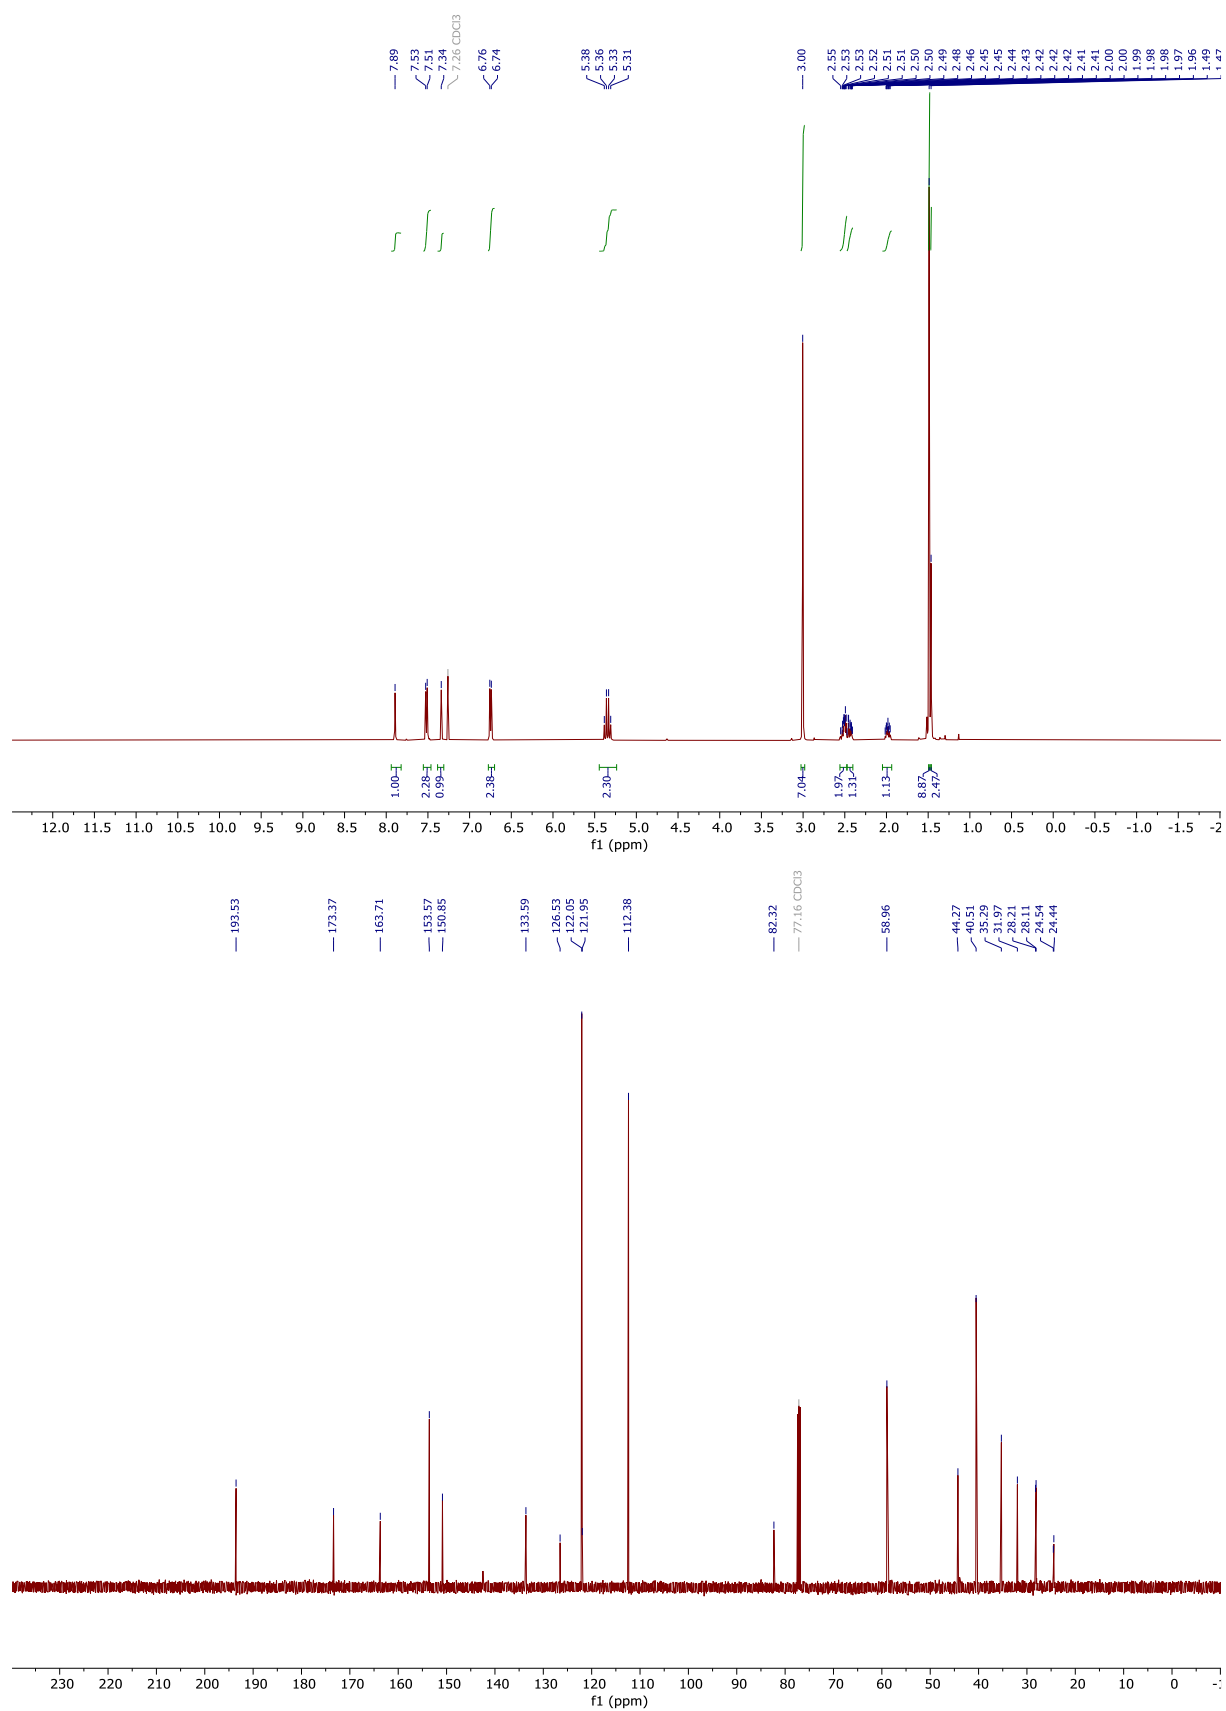

**Supplementary Fig. 70.** The <sup>1</sup>H-NMR (500 MHz) and <sup>13</sup>C-NMR (125 MHz) spectra of compound **32R/32S** in CDCl<sub>3</sub>

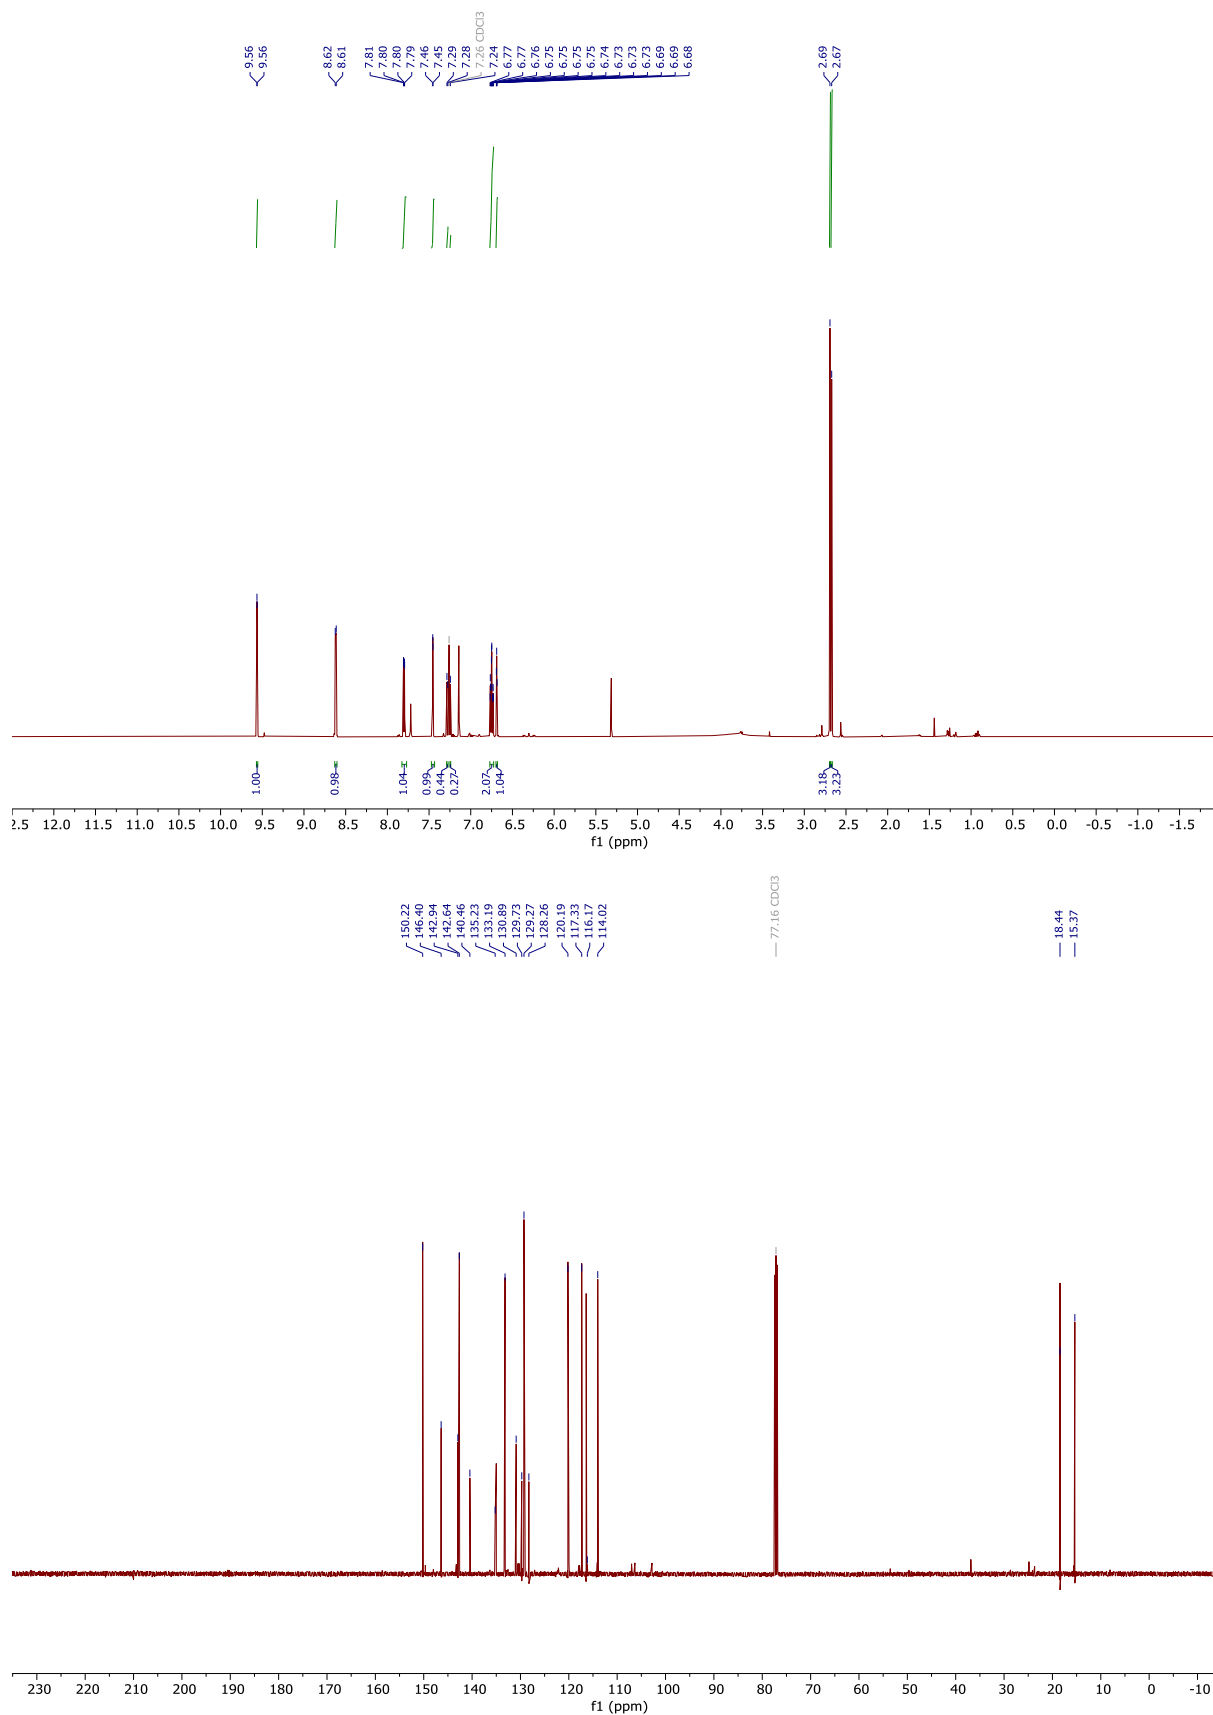

**Supplementary Fig. 71.** The  $^1\text{H-NMR}$  (500 MHz) and  $^{13}\text{C-NMR}$  (125 MHz) spectra of compound **S20** in  $\text{CDCl}_3$

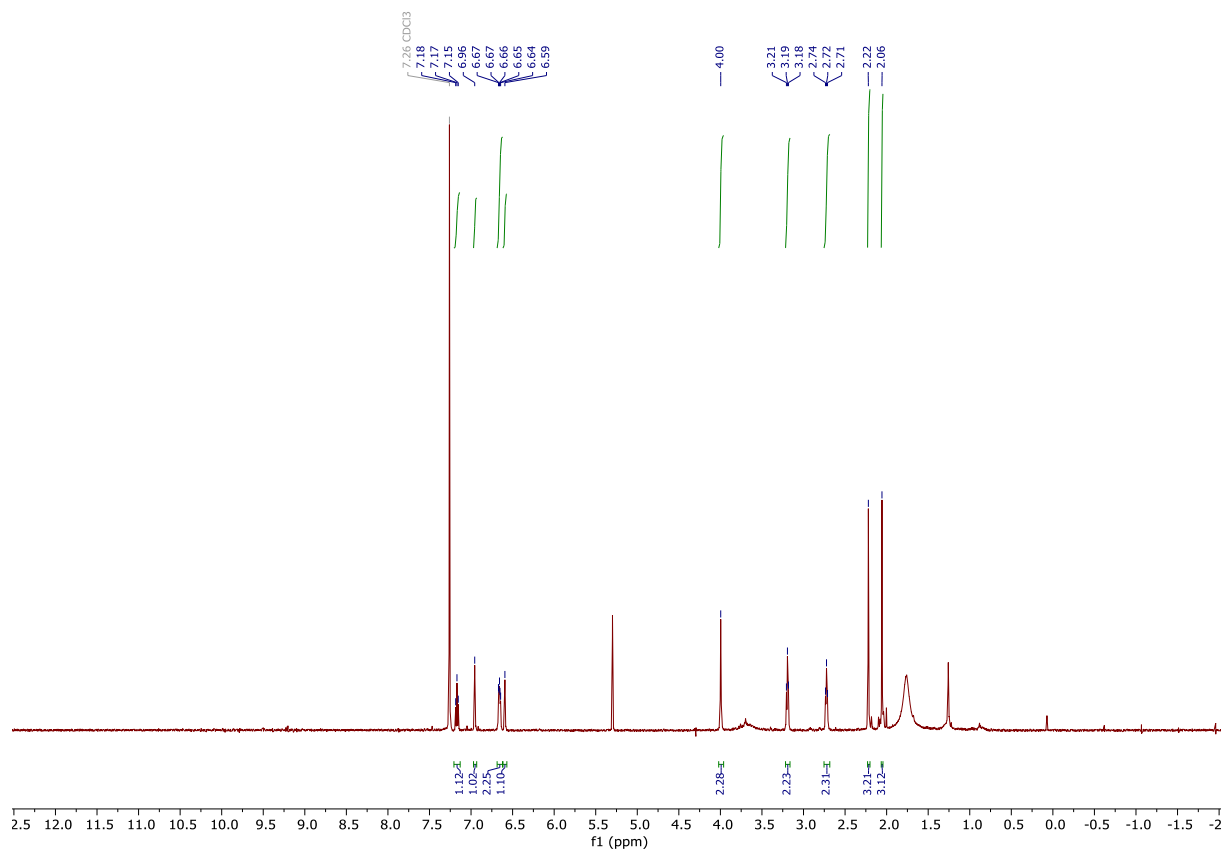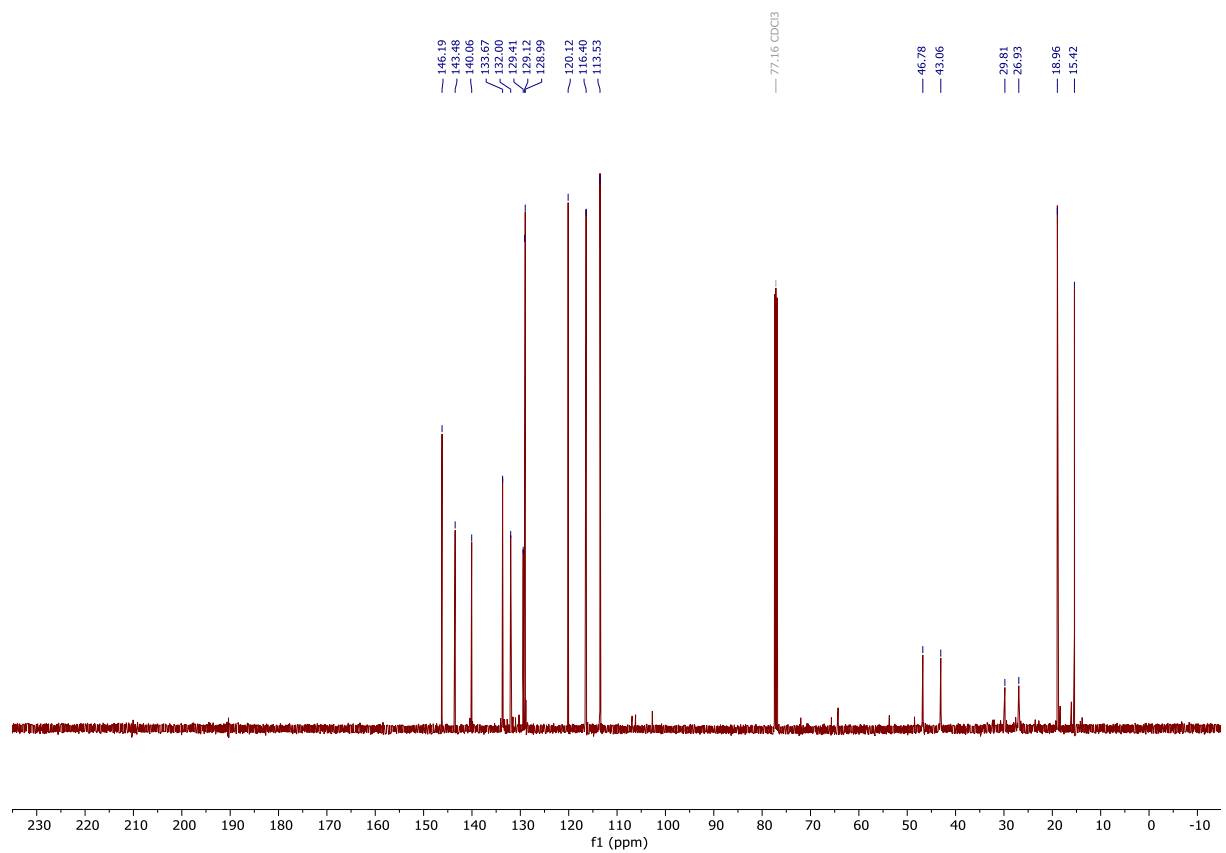

**Supplementary Fig. 72.** The <sup>1</sup>H-NMR (500 MHz) and <sup>13</sup>C-NMR (125 MHz) spectra of compound S21 in CDCl<sub>3</sub>

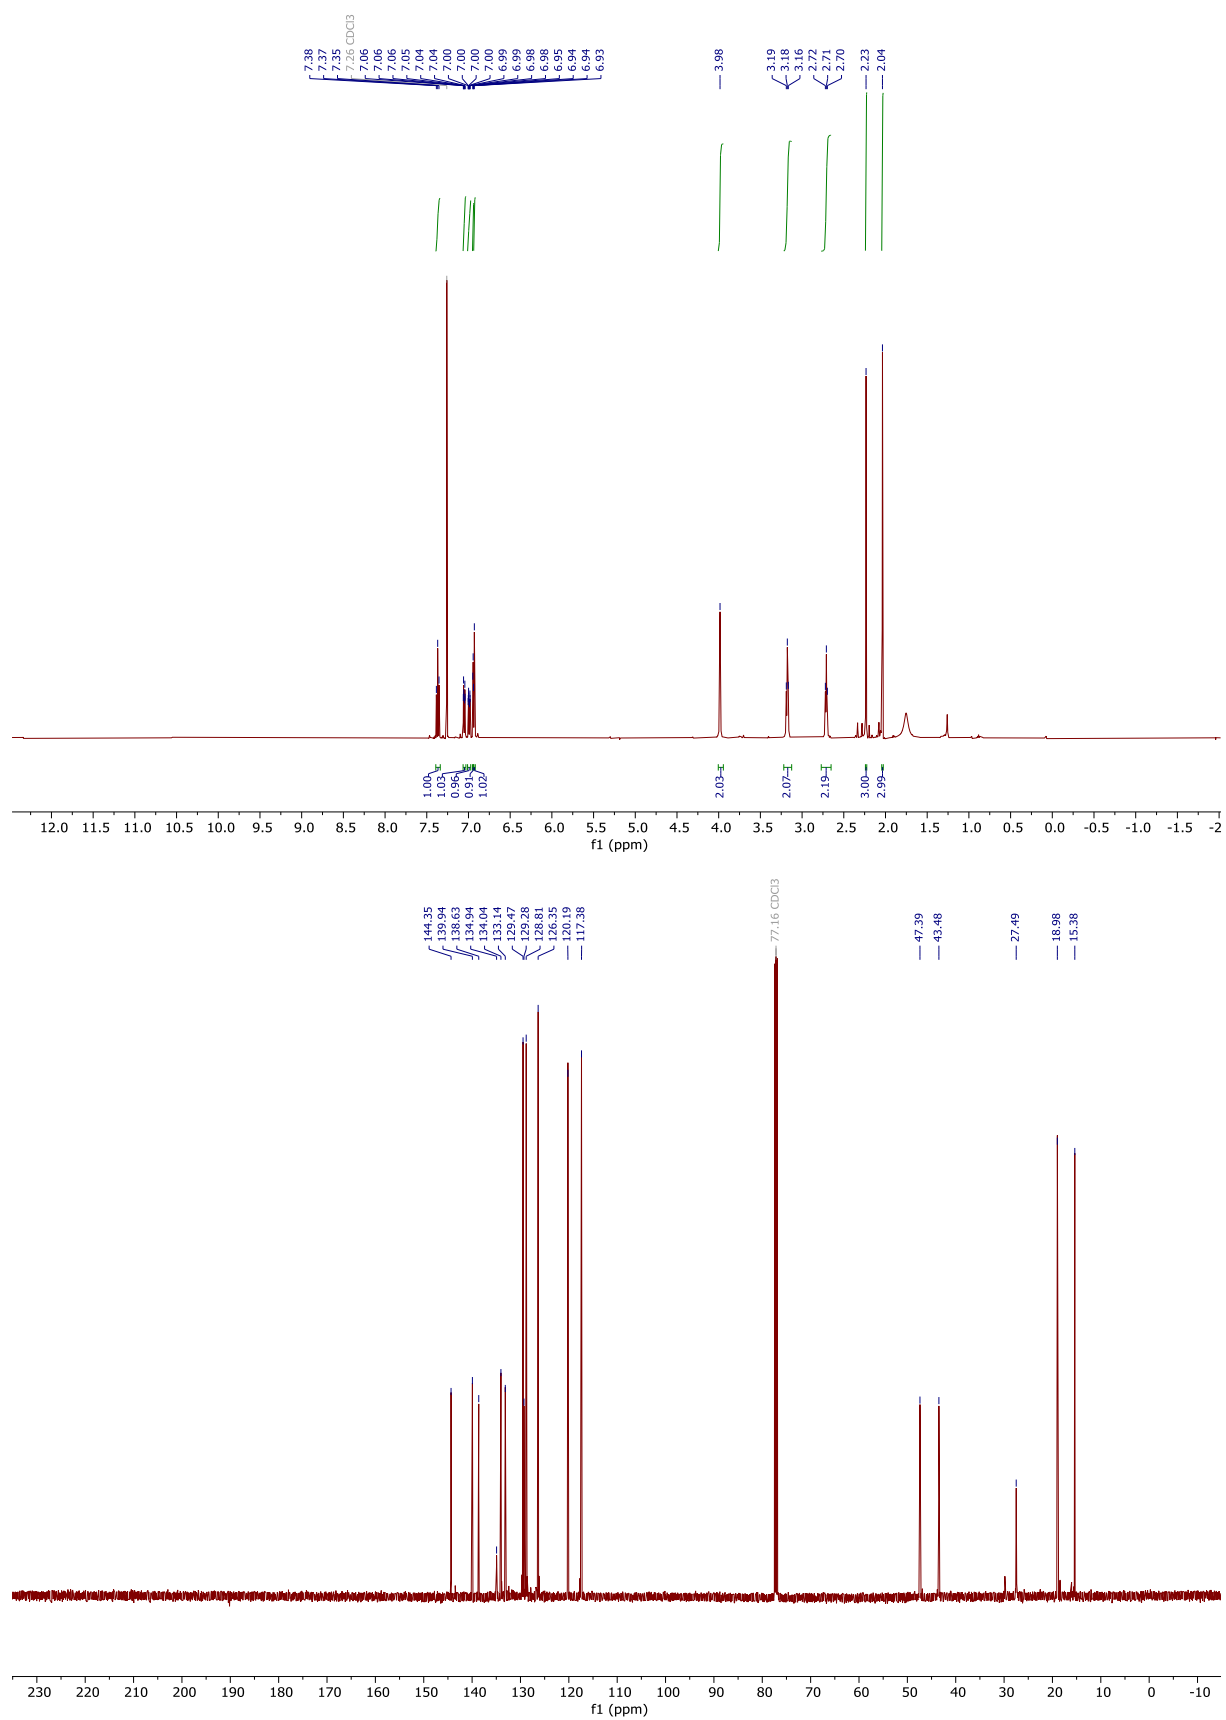

**Supplementary Fig. 73.** The <sup>1</sup>H-NMR (500 MHz) and <sup>13</sup>C-NMR (125 MHz) spectra of compound S22 in CDCl<sub>3</sub>



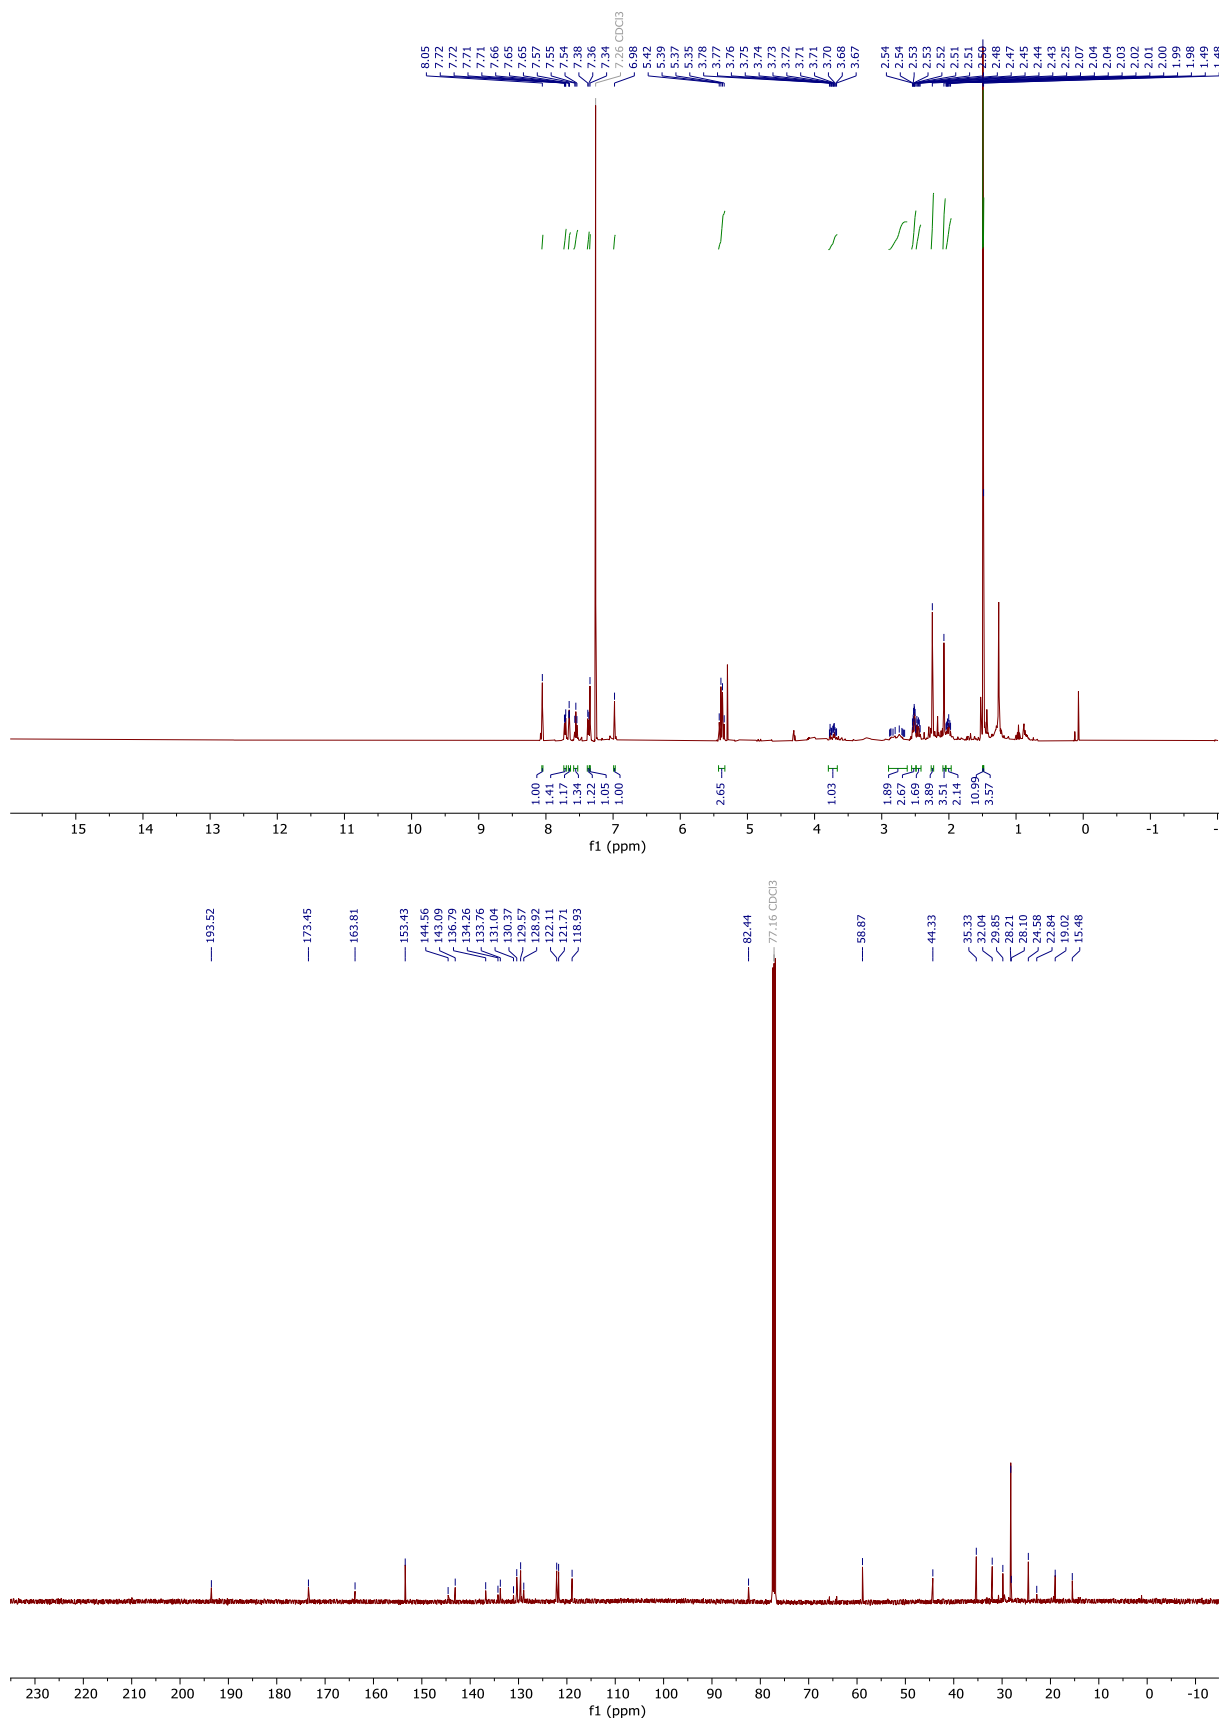

**Supplementary Fig. 74.** The  $^1\text{H-NMR}$  (500 MHz) and  $^{13}\text{C-NMR}$  (125 MHz) spectra of compound **33S** in  $\text{CDCl}_3$

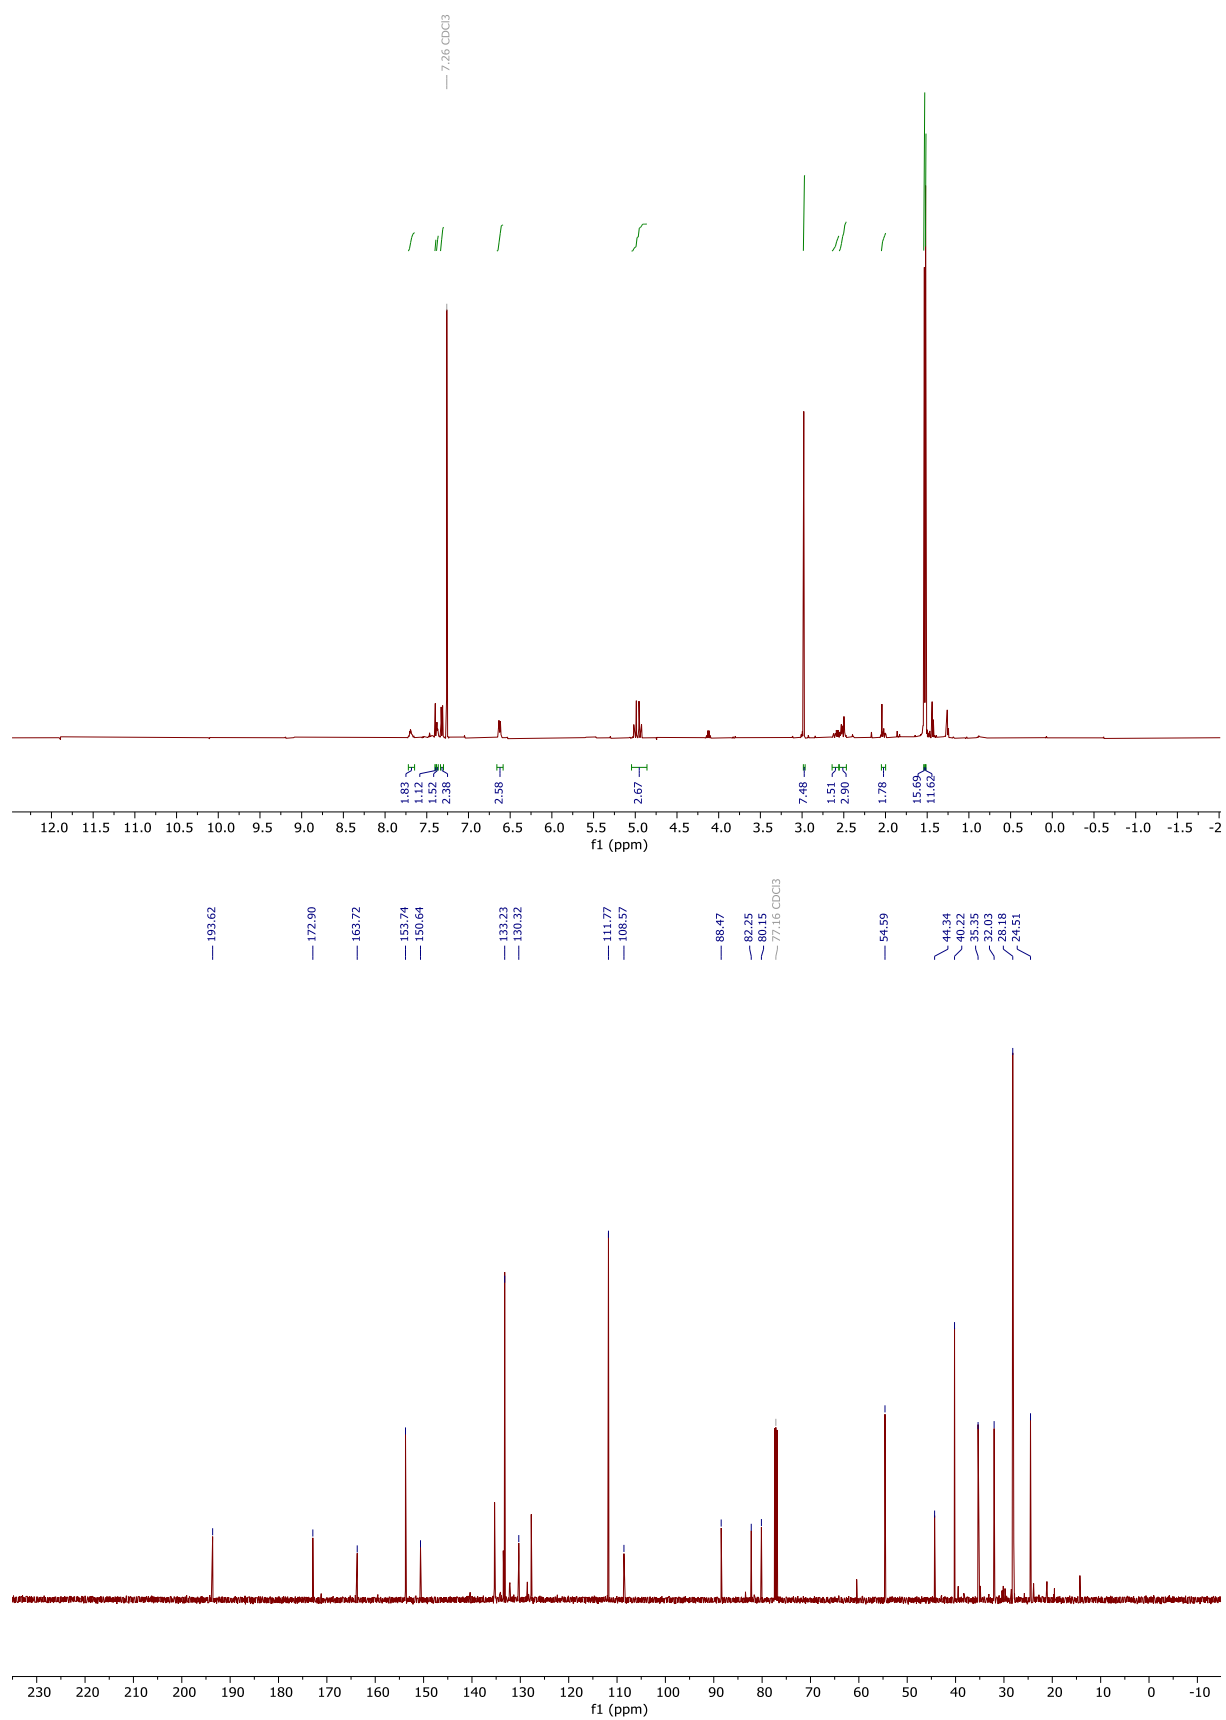

**Supplementary Fig. 75.** The <sup>1</sup>H-NMR (500 MHz) and <sup>13</sup>C-NMR (125 MHz) spectra of compound **34R/34S** in CDCl<sub>3</sub>

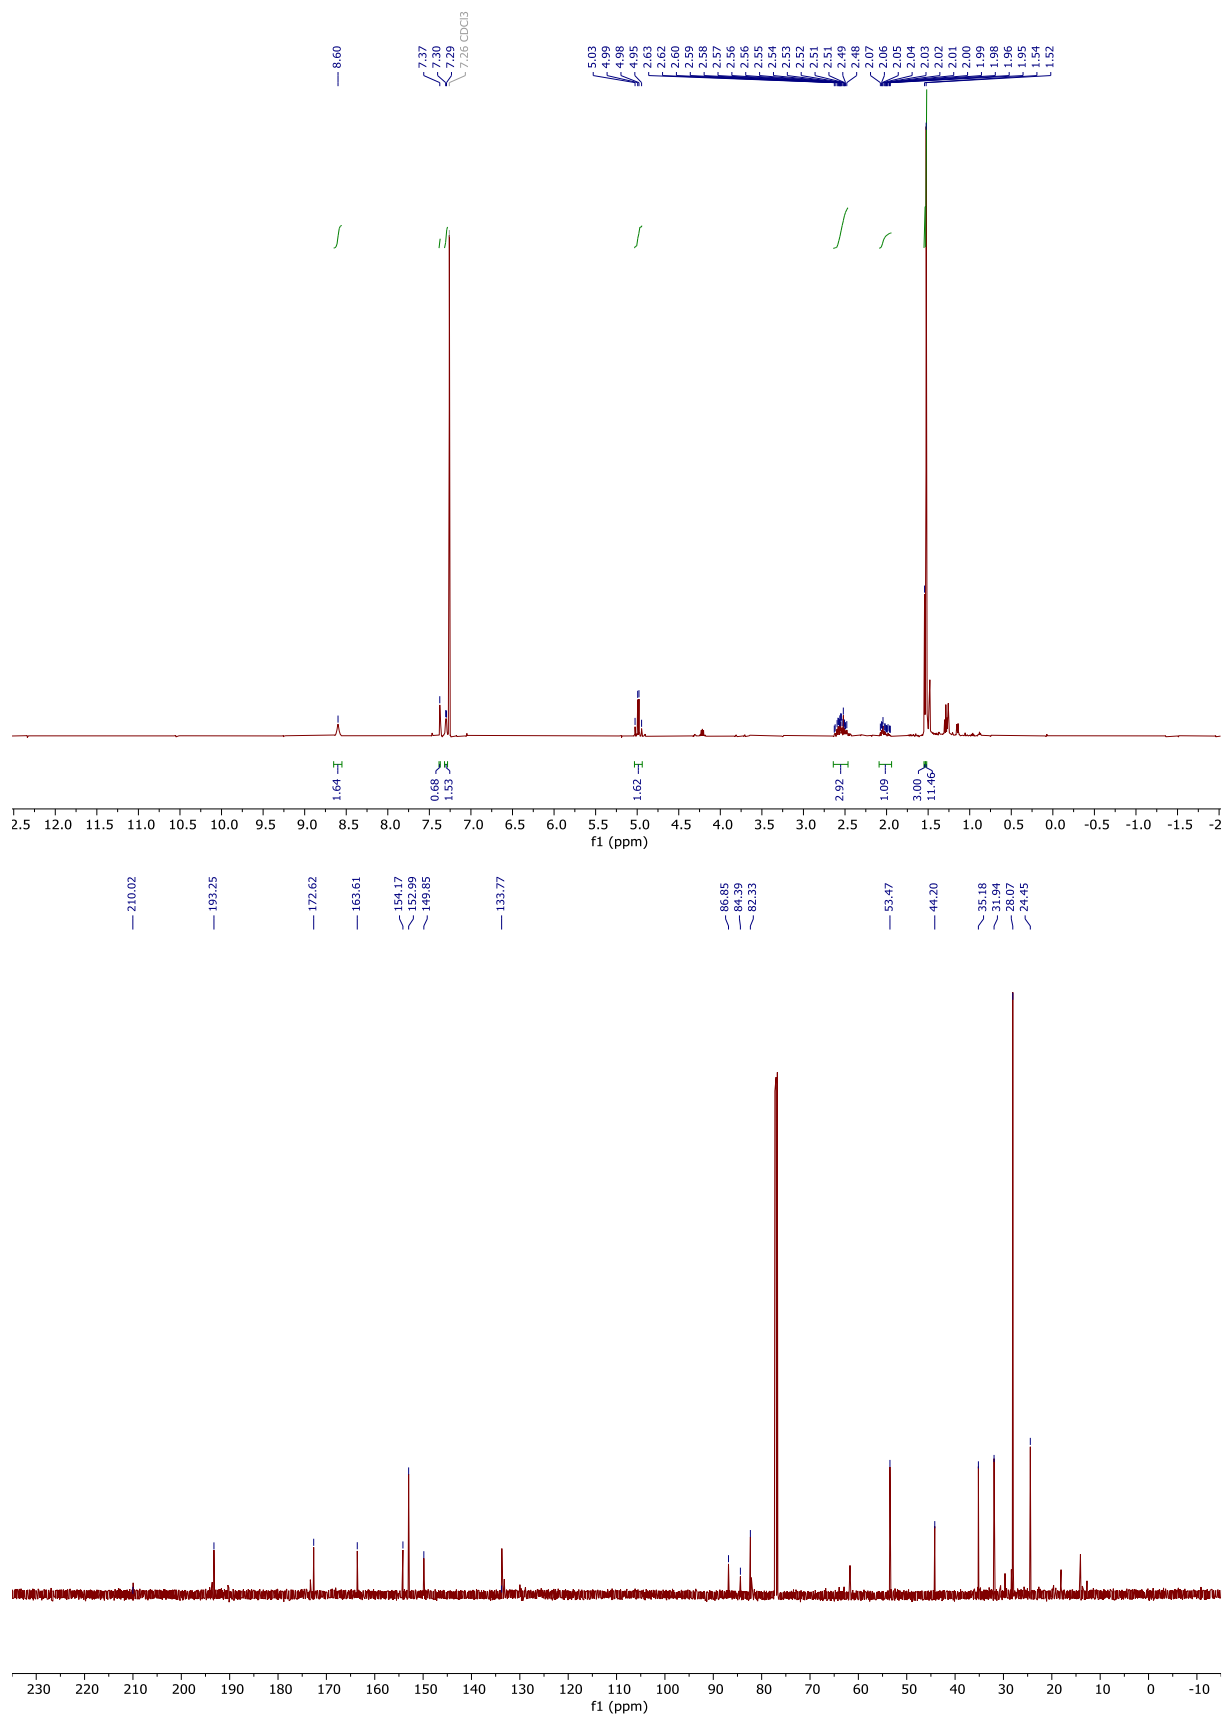

**Supplementary Fig. 76.** The <sup>1</sup>H-NMR (500 MHz) and <sup>13</sup>C-NMR (125 MHz) spectra of compound 35R/35S in CDCl<sub>3</sub>

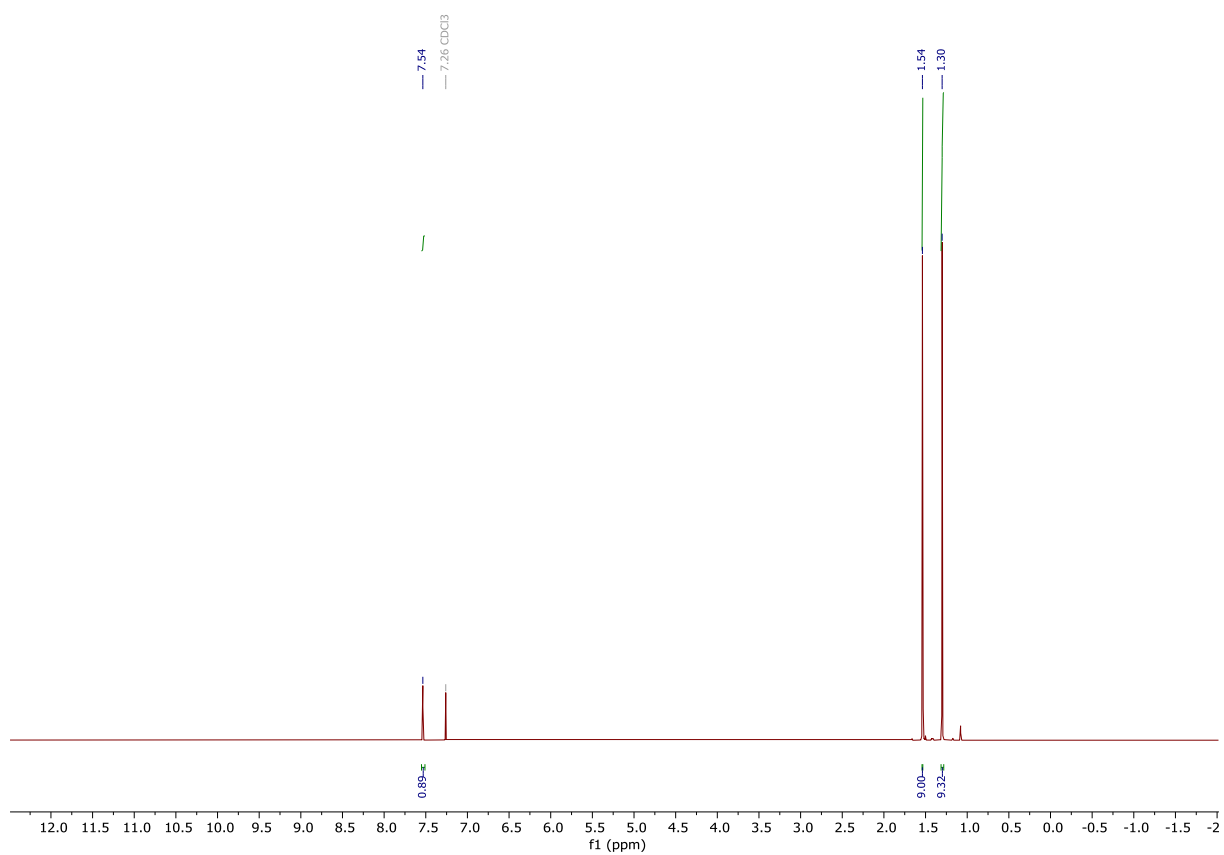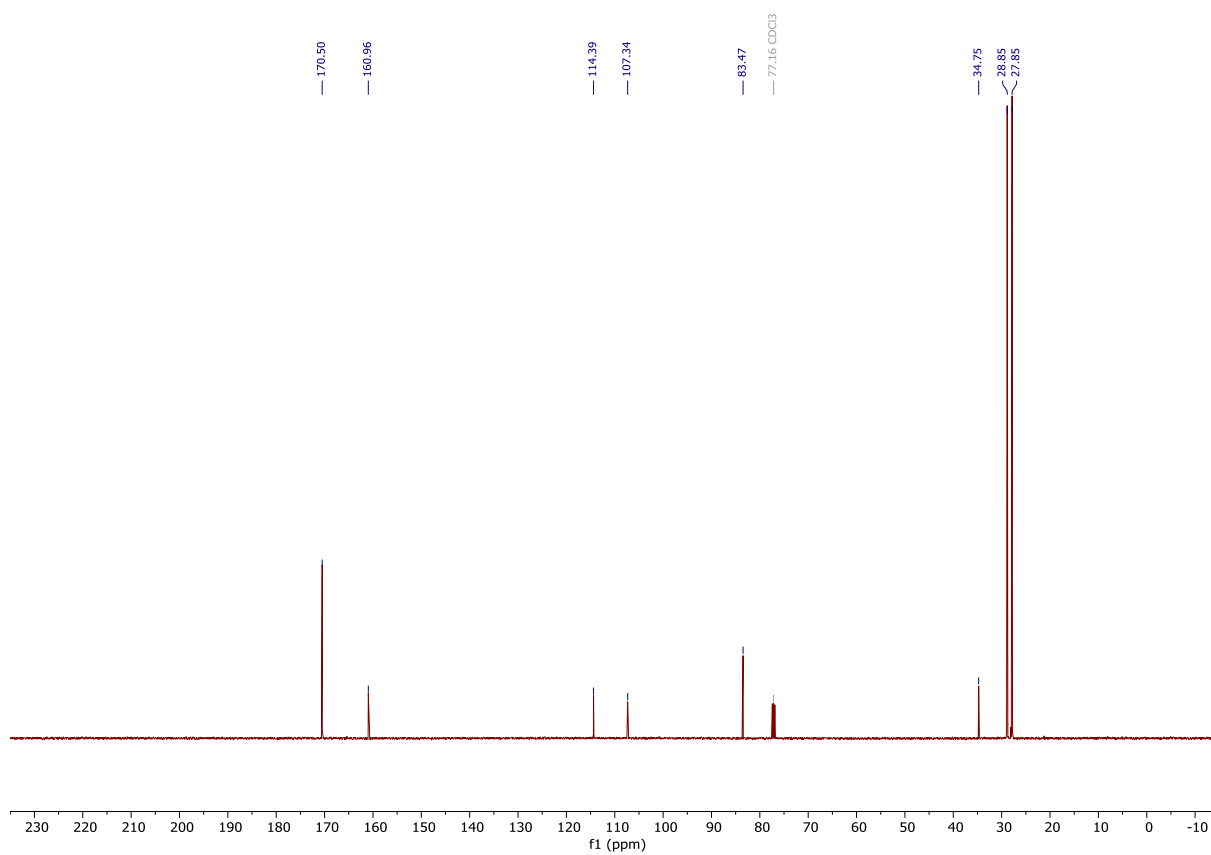

**Supplementary Fig. 77.** The  $^1\text{H-NMR}$  (500 MHz) and  $^{13}\text{C-NMR}$  (125 MHz) spectra of compound **40** in  $\text{CDCl}_3$

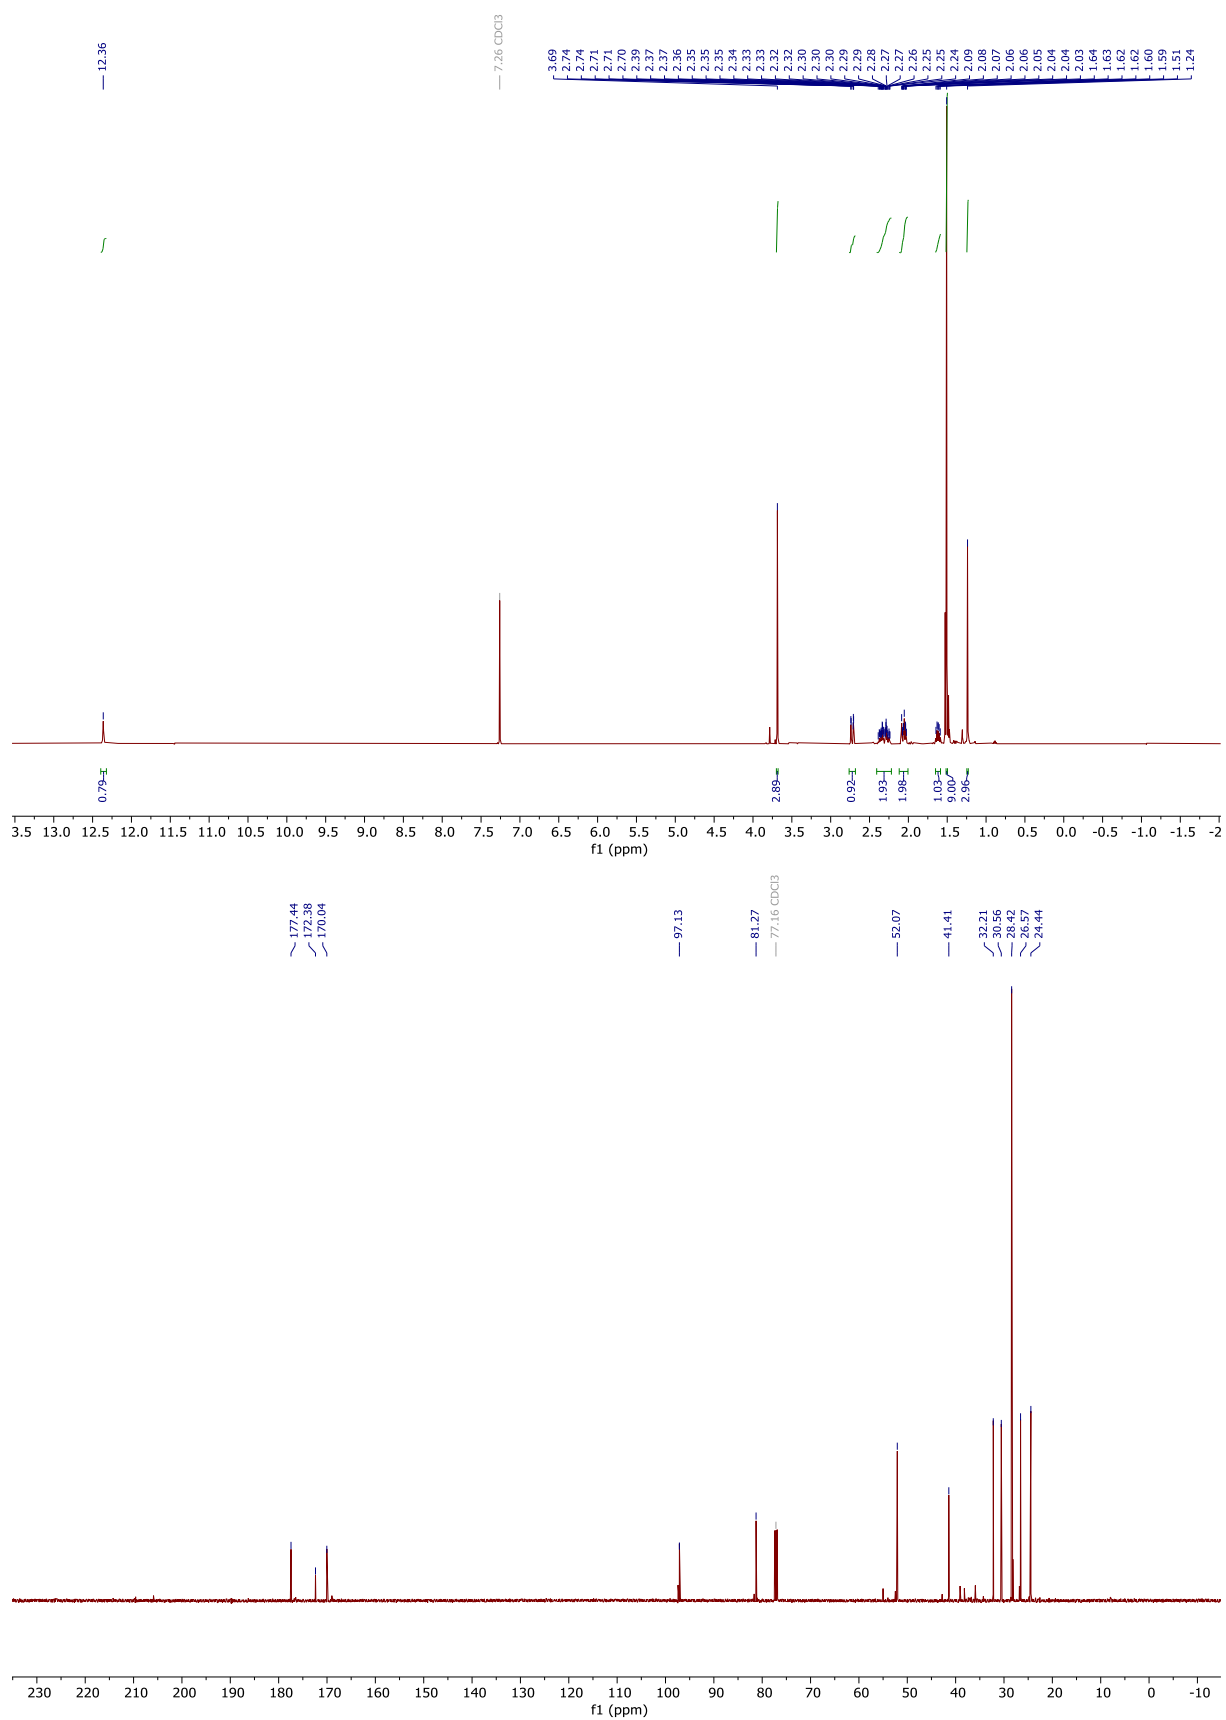

**Supplementary Fig. 78.** The <sup>1</sup>H-NMR (500 MHz) and <sup>13</sup>C-NMR (125 MHz) spectra of compound 3''R in CDCl<sub>3</sub>

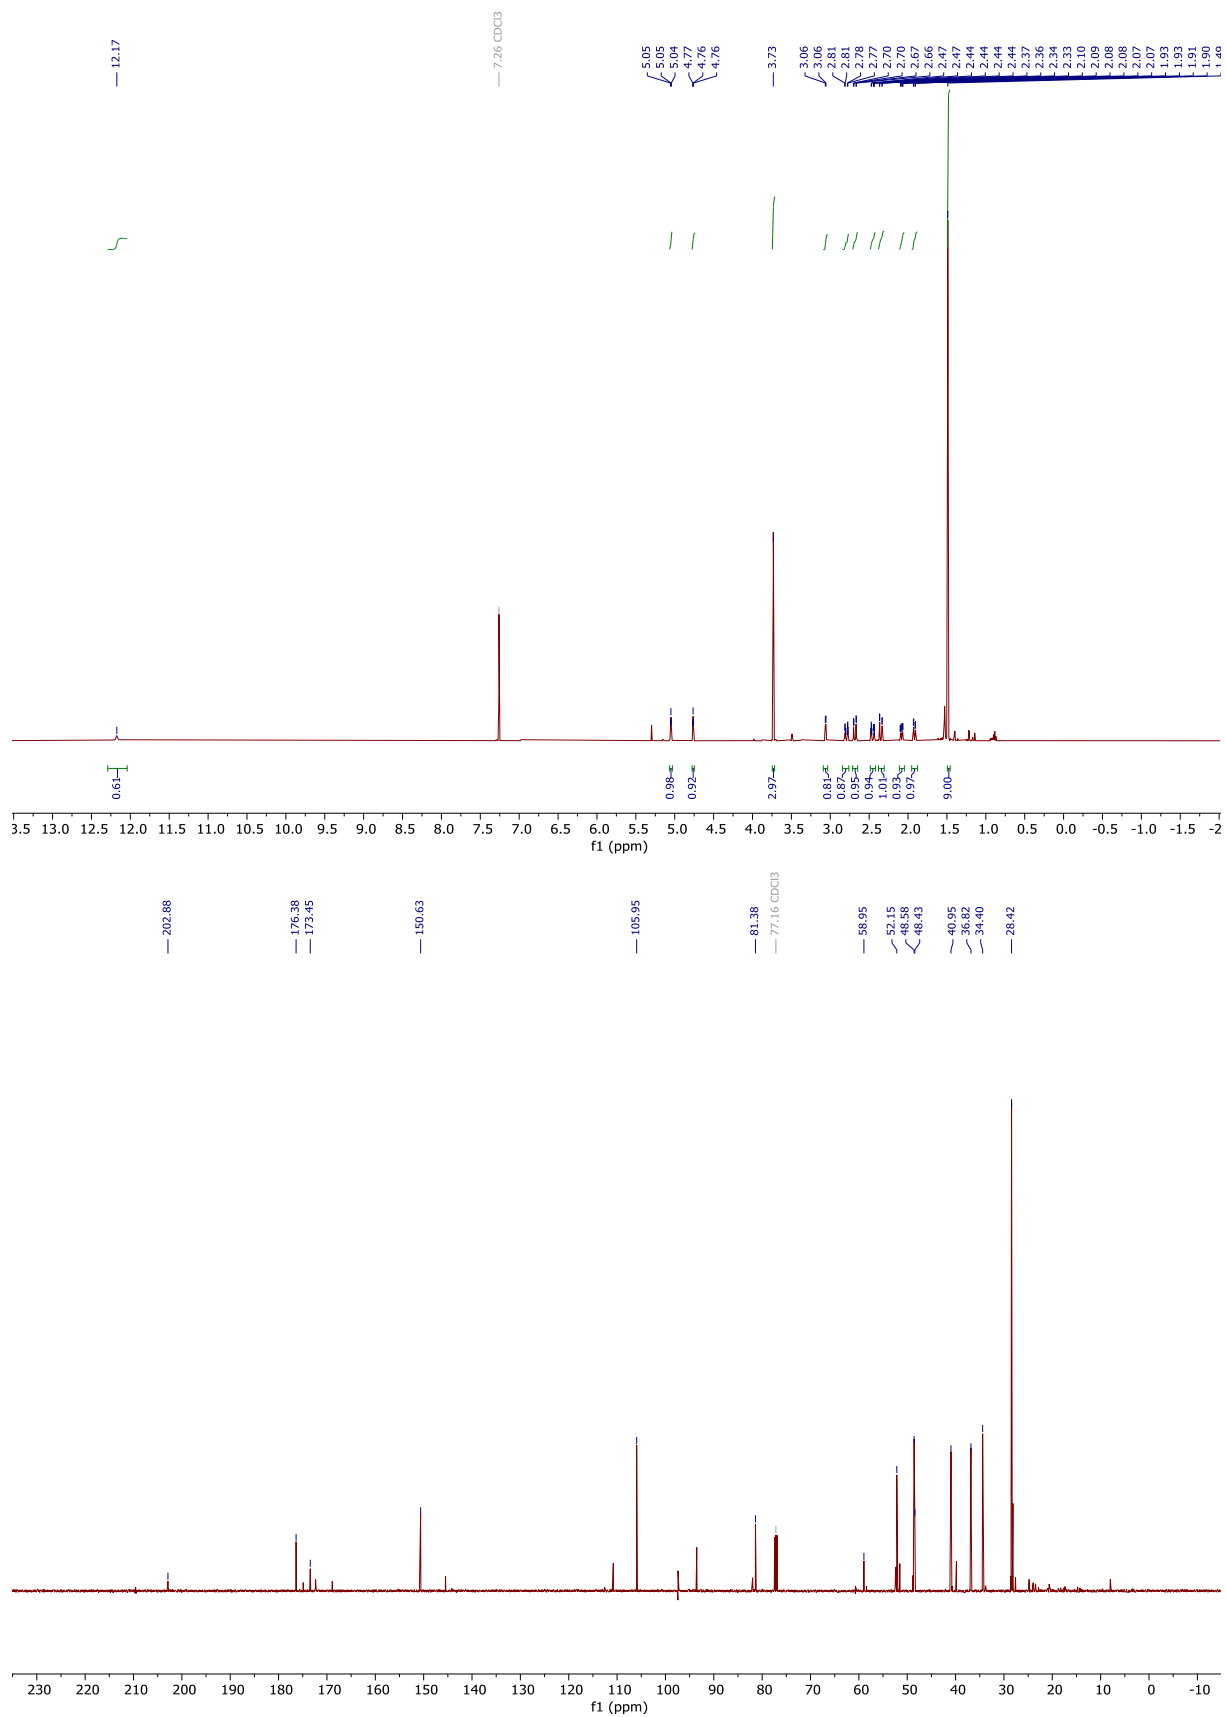

**Supplementary Fig. 79.** The  $^1\text{H-NMR}$  (500 MHz) and  $^{13}\text{C-NMR}$  (125 MHz) spectra of compound **6''R,R** in  $\text{CDCl}_3$

## High-performance liquid chromatography chromatograms

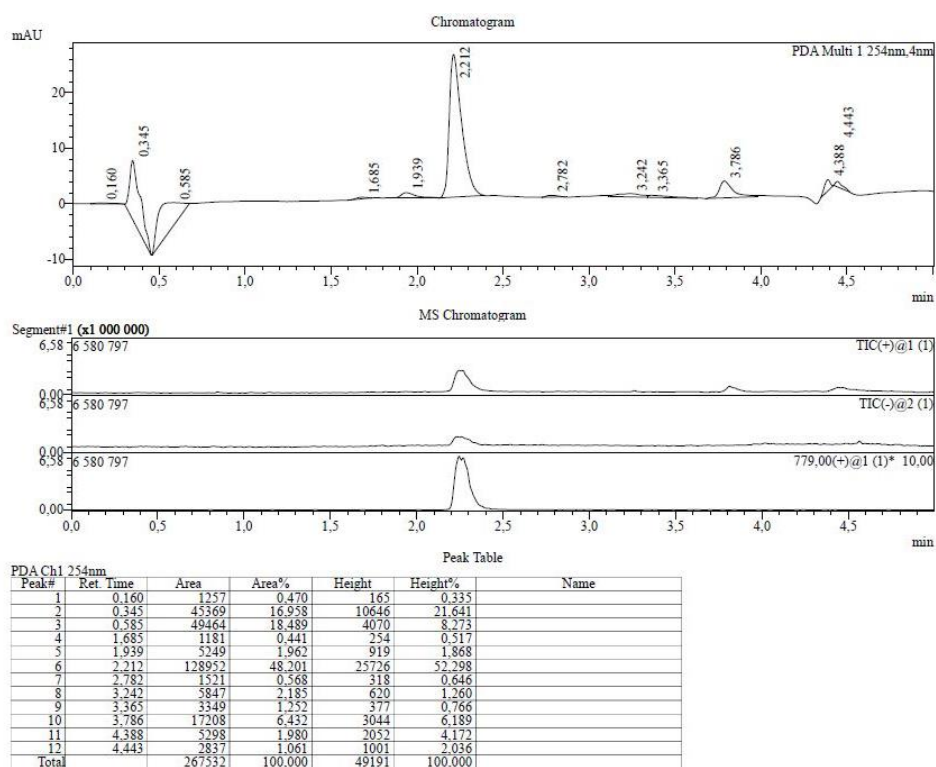

**Supplementary Fig. 80.** The high-performance liquid chromatography chromatogram of compound **2-biotin**

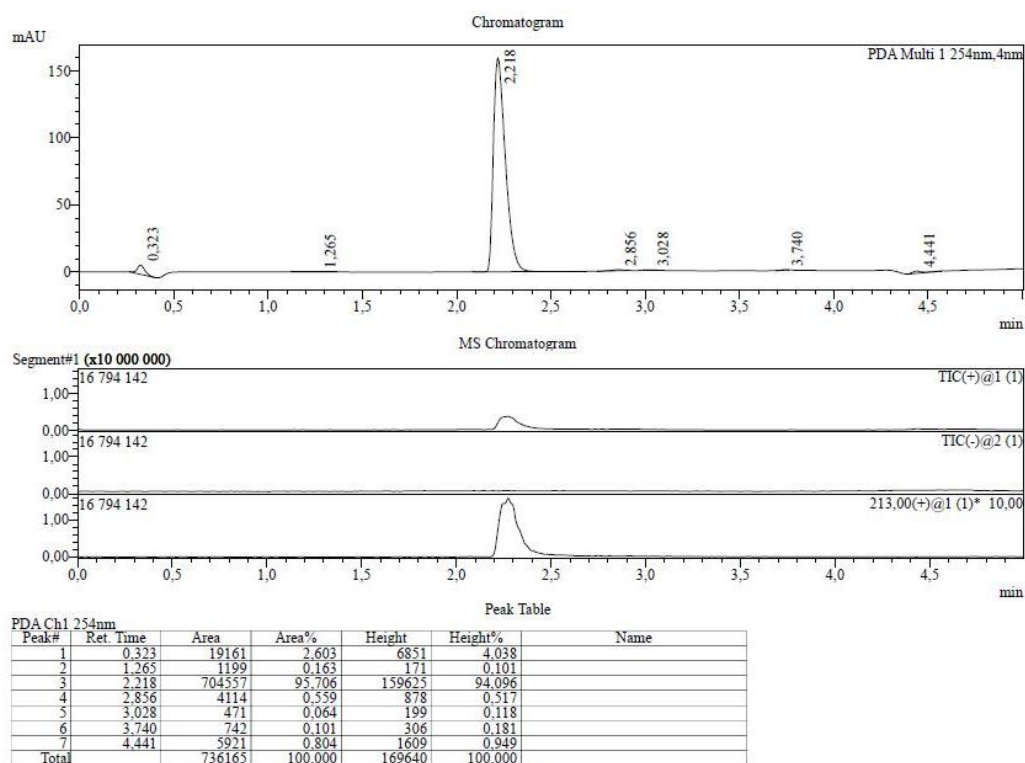

**Supplementary Fig. 81.** The high-performance liquid chromatography chromatogram of compound **3/3R/3S**

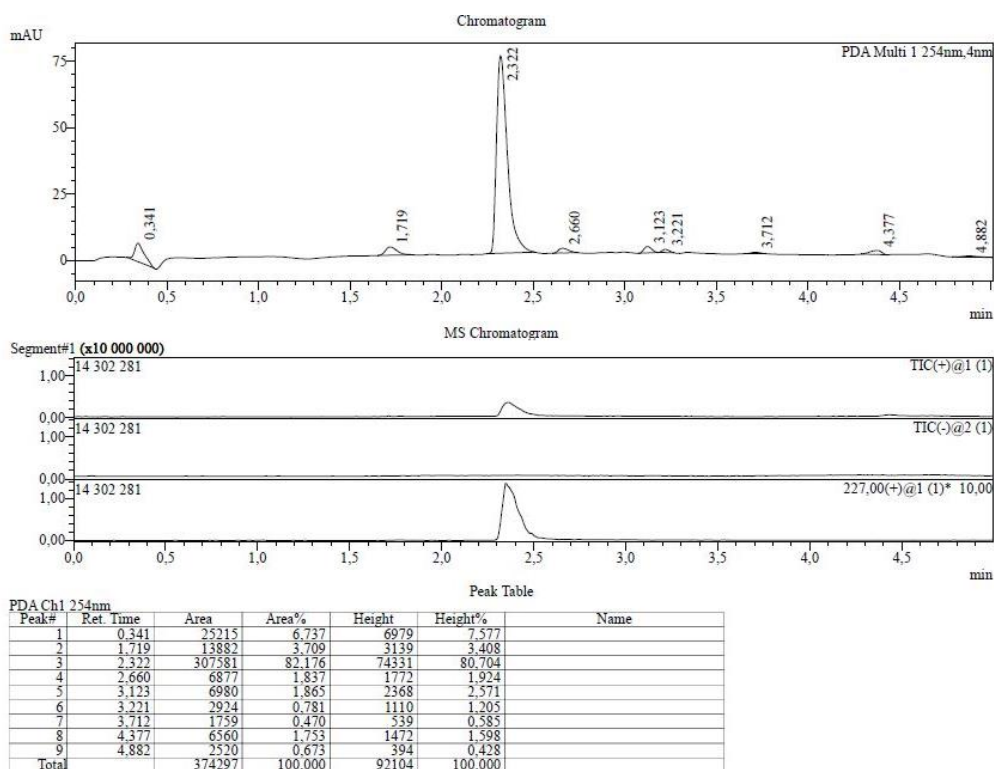

**Supplementary Fig. 82.** The high-performance liquid chromatography chromatogram of compound 3'R

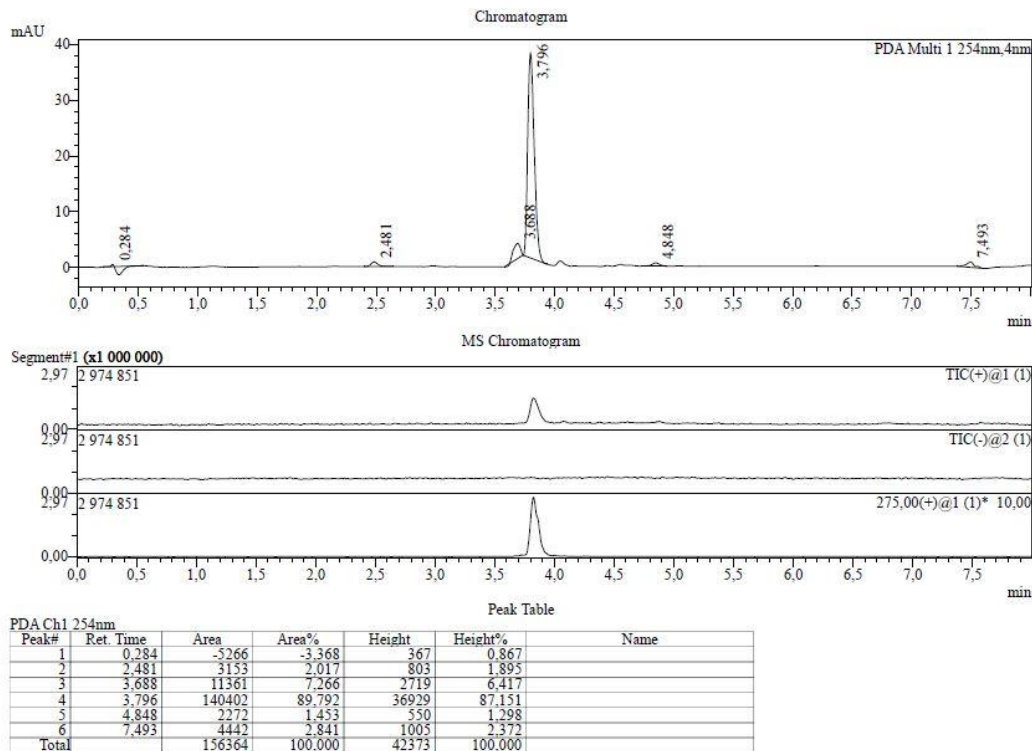

**Supplementary Fig. 83.** The high-performance liquid chromatography chromatogram of compound 5



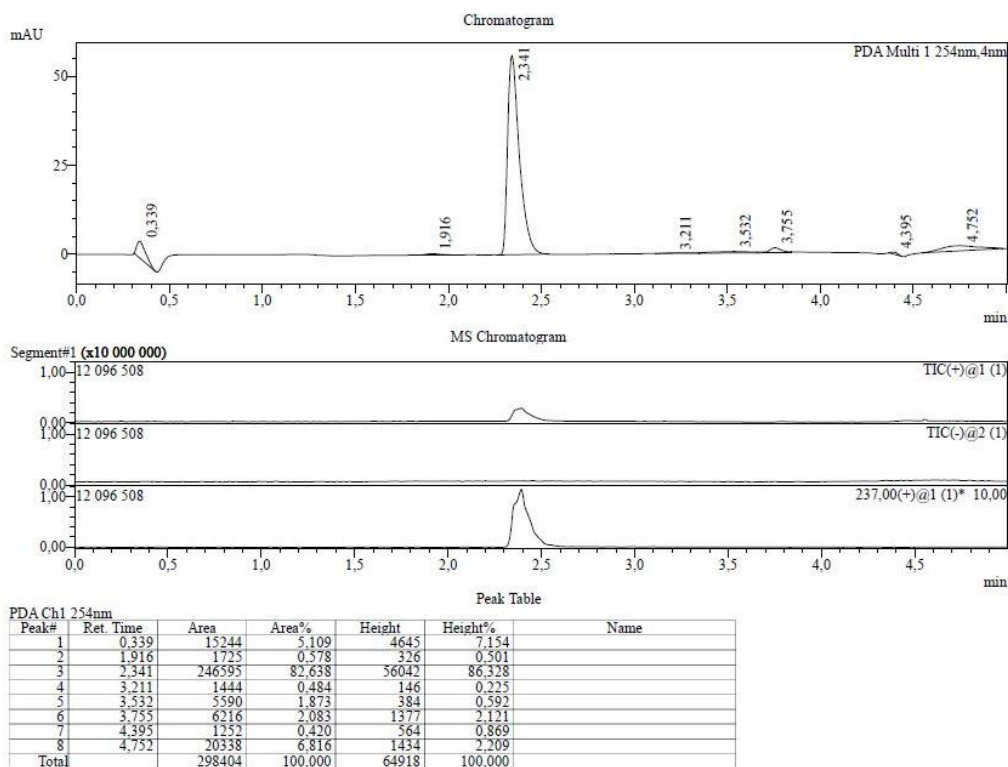

**Supplementary Fig. 84.** The high-performance liquid chromatography chromatogram of compound 6, 6*R,R*,6*S,S*

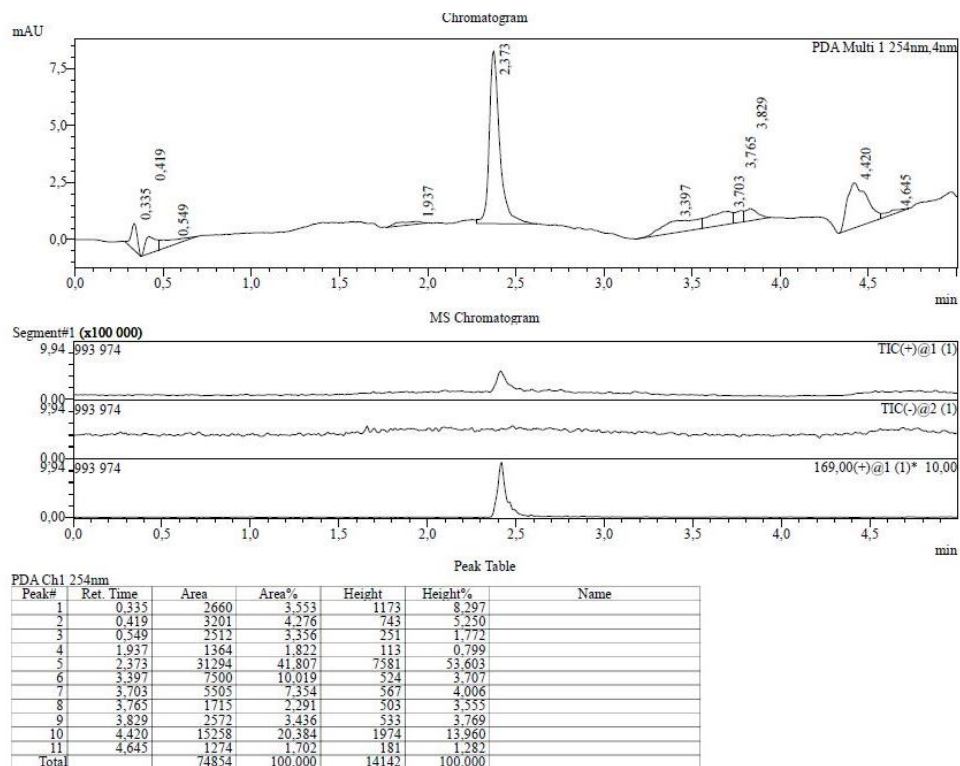

**Supplementary Fig. 85.** The high-performance liquid chromatography chromatogram of compound 7

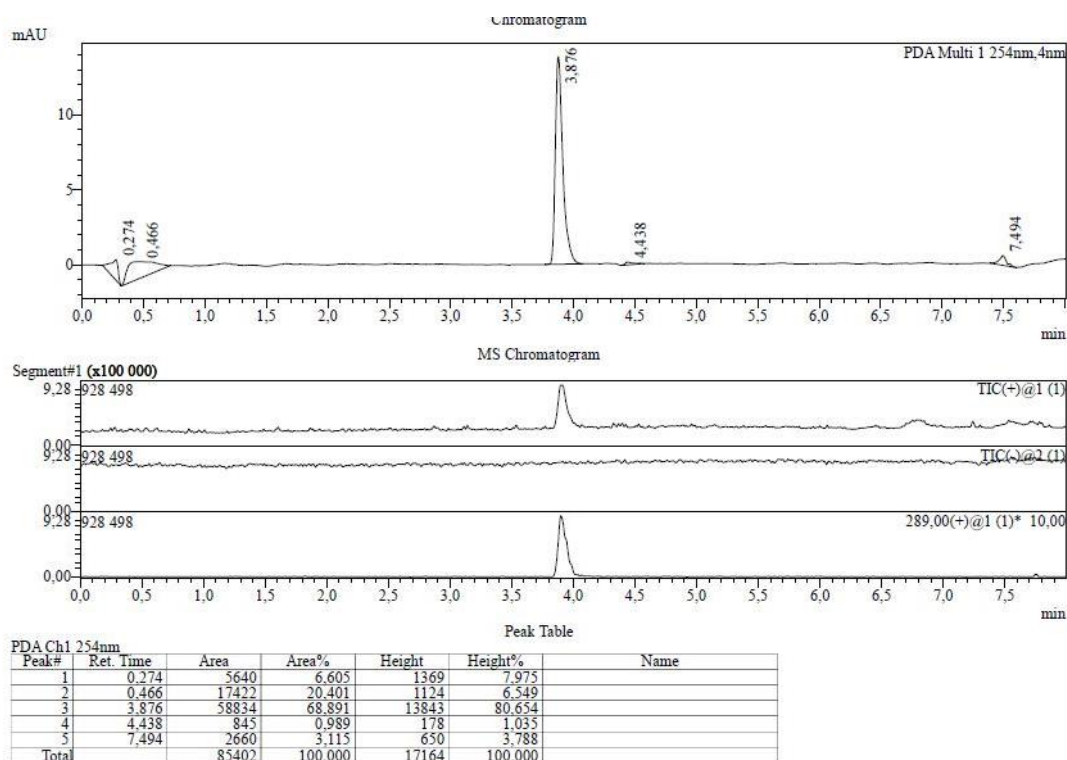

**Supplementary Fig. 86.** The high-performance liquid chromatography chromatogram of compound **8**, **8R/8S**

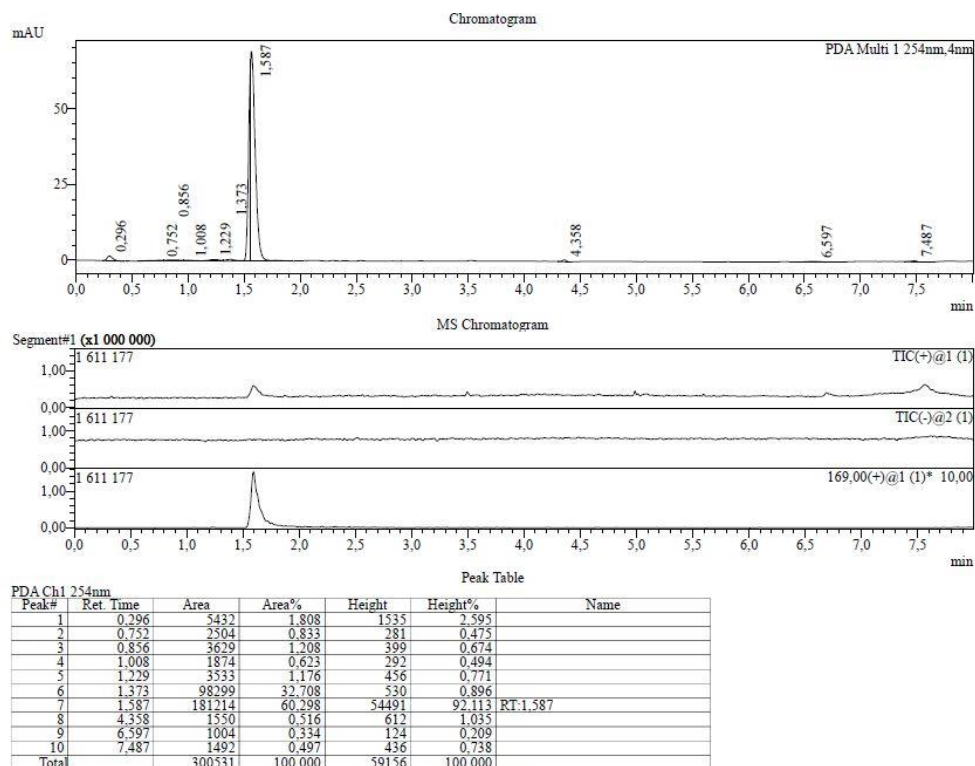

**Supplementary Fig. 87.** The high-performance liquid chromatography chromatogram of compound **9**

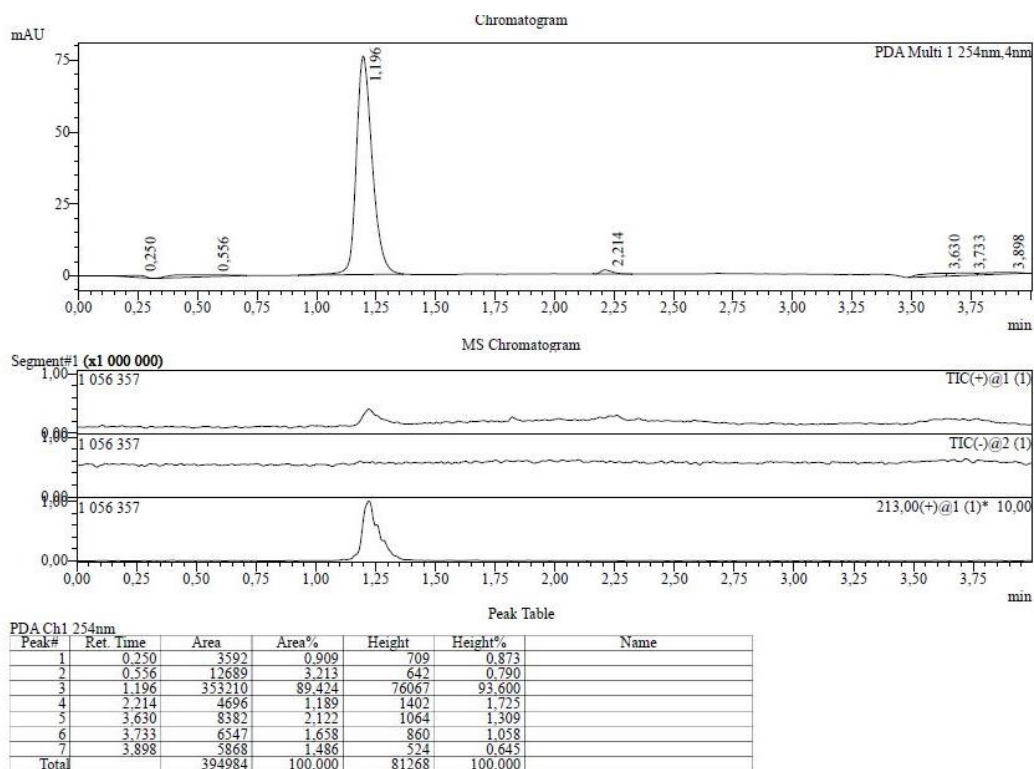

**Supplementary Fig. 88.** The high-performance liquid chromatography chromatogram of compound 10, 10R/10S

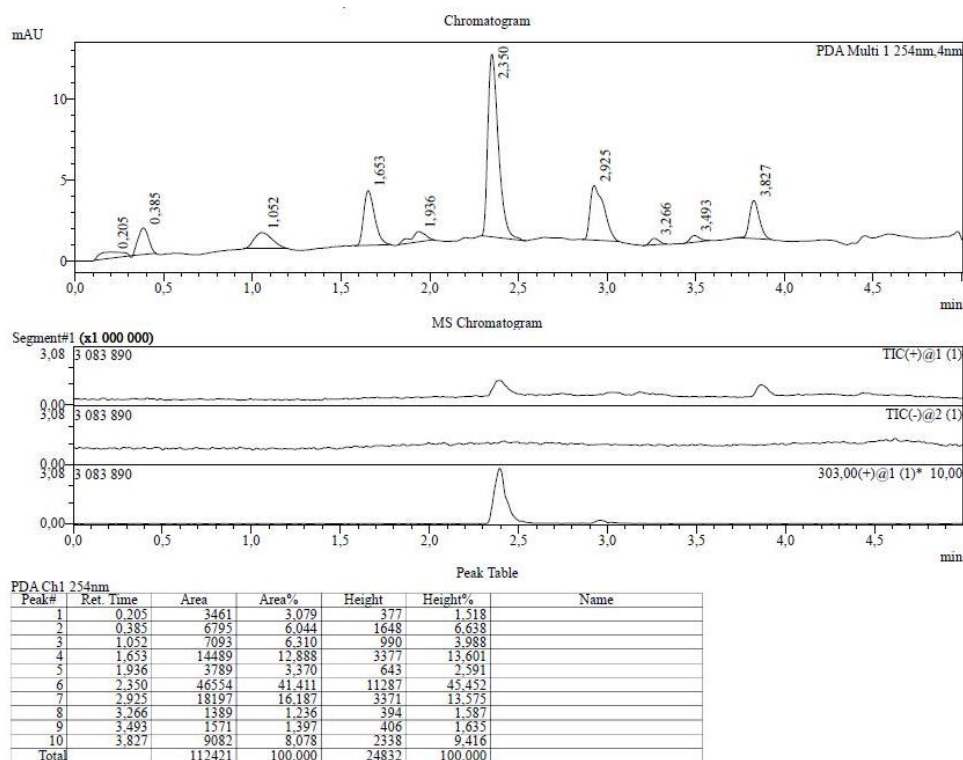

**Supplementary Fig. 89.** The high-performance liquid chromatography chromatogram of compound 12, 12R/12S

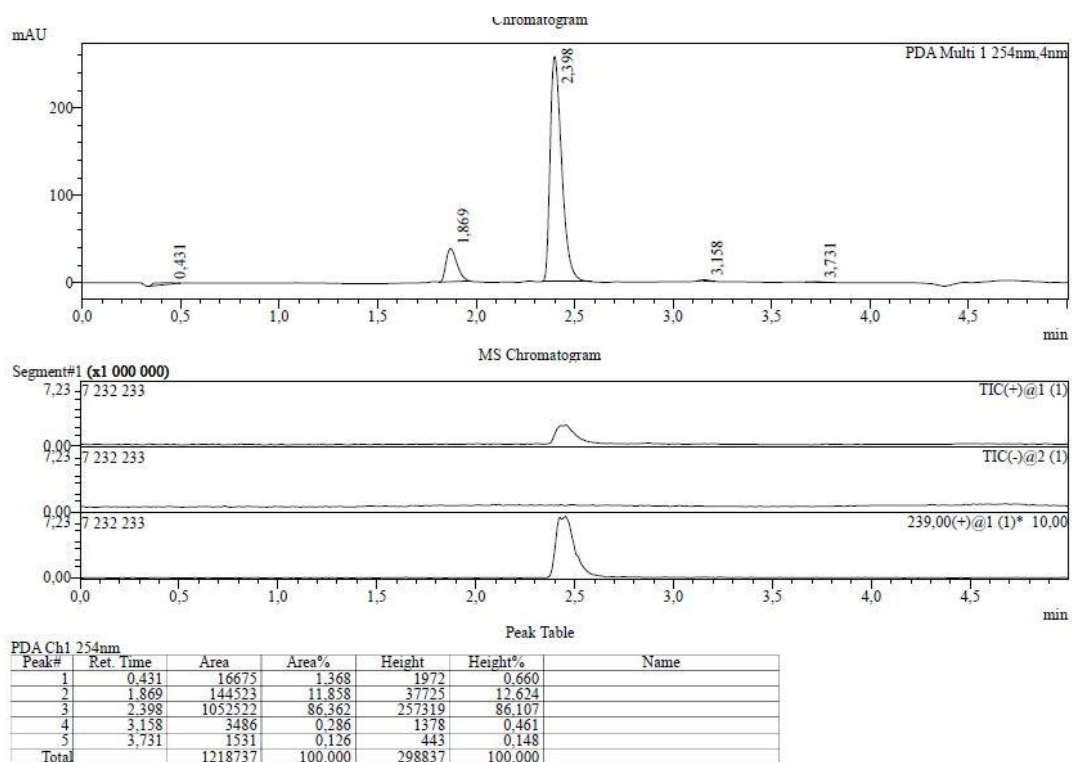

**Supplementary Fig. 90.** The high-performance liquid chromatography chromatogram of compound 13, 13R/13S

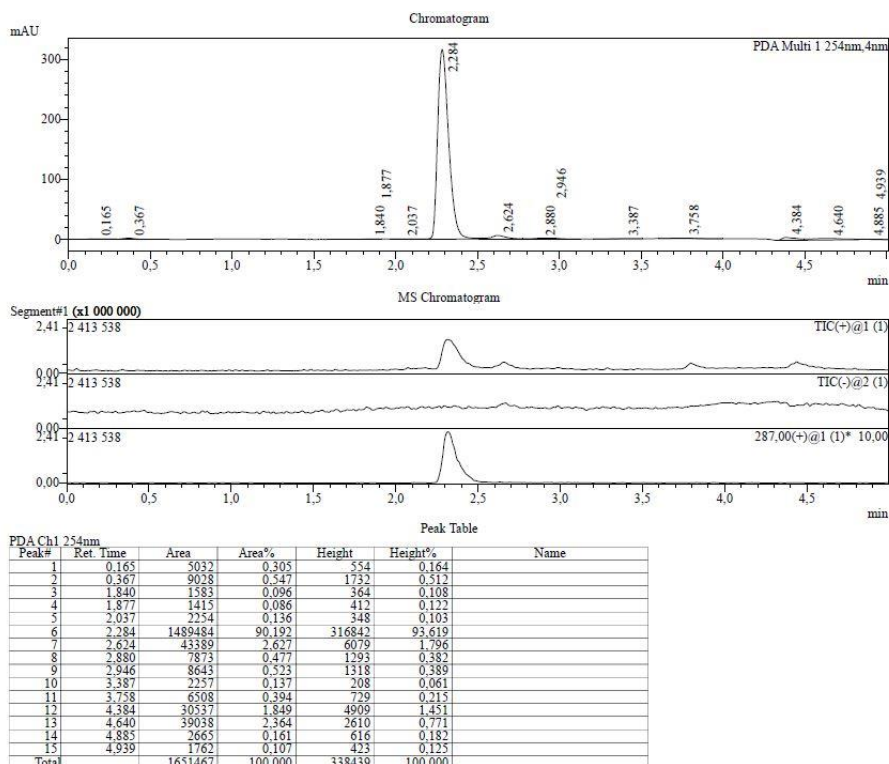

**Supplementary Fig. 91.** The high-performance liquid chromatography chromatogram of compound 14

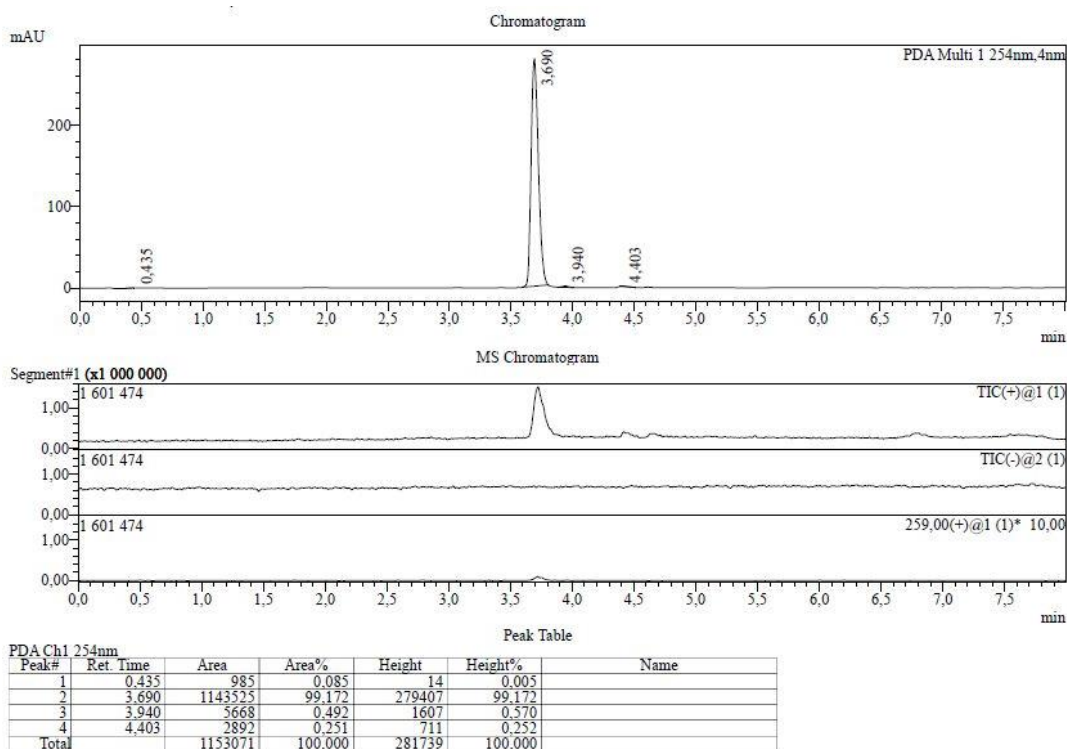

**Supplementary Fig. 92.** The high-performance liquid chromatography chromatogram of compound 15

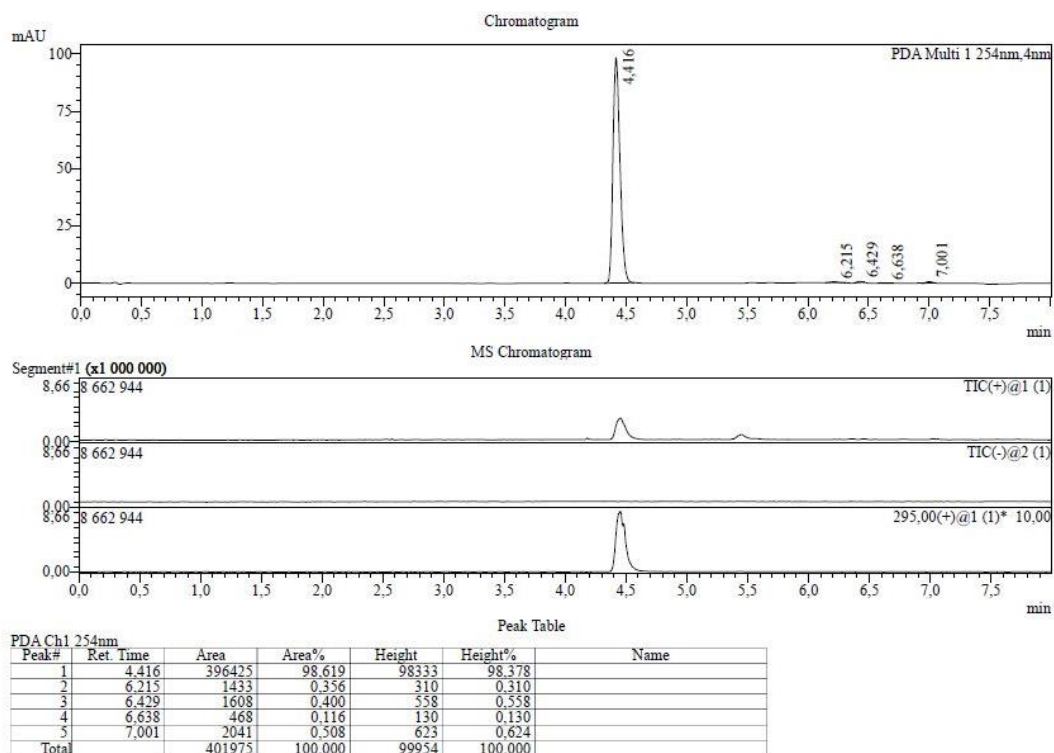

**Supplementary Fig. 93.** The high-performance liquid chromatography chromatogram of compound 16

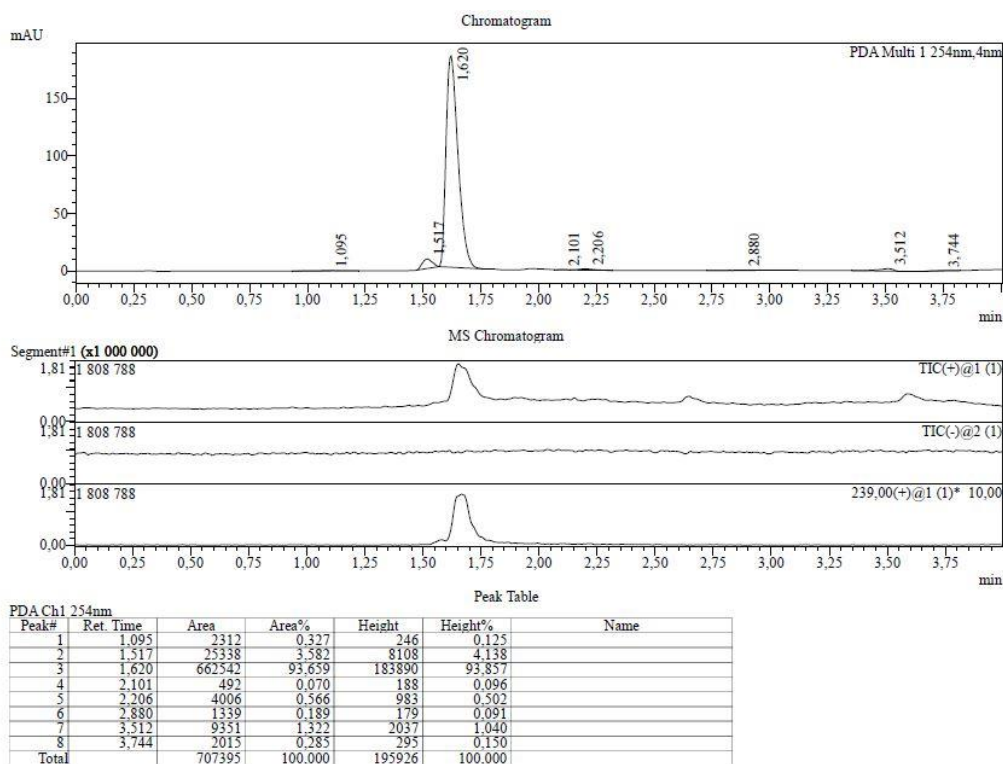

**Supplementary Fig. 94.** The high-performance liquid chromatography chromatogram of compound 17

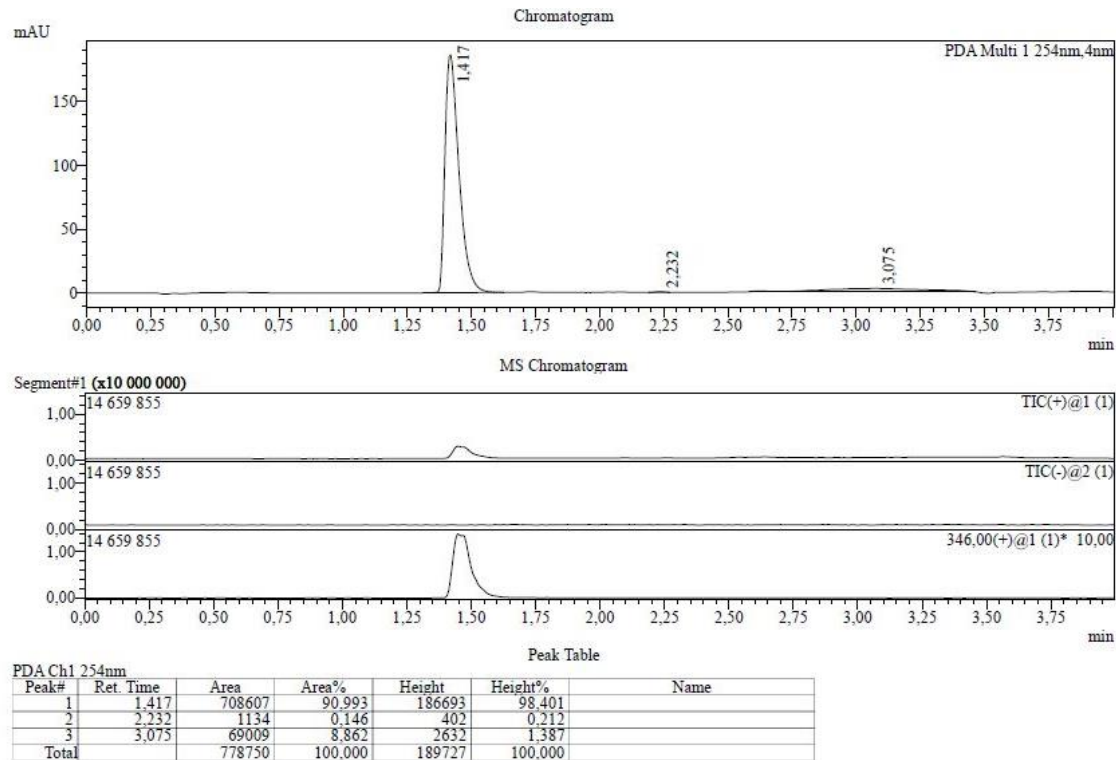

**Supplementary Fig. 95.** The high-performance liquid chromatography chromatogram of compound S7

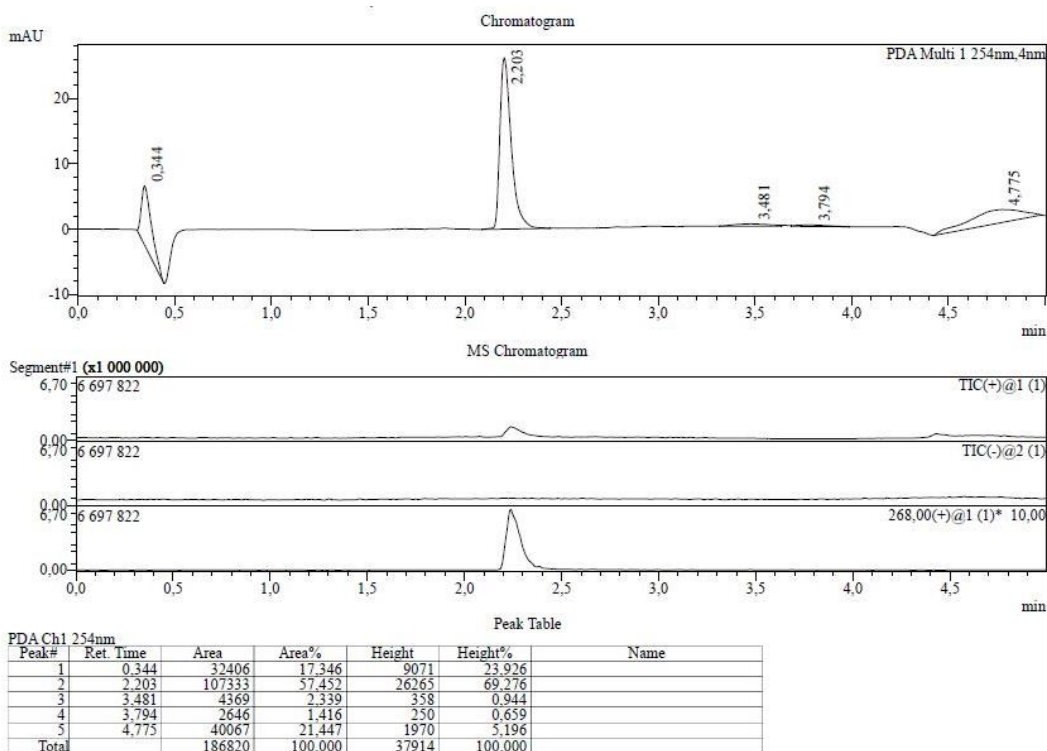

**Supplementary Fig. 96.** The high-performance liquid chromatography chromatogram of compound **18/18R**

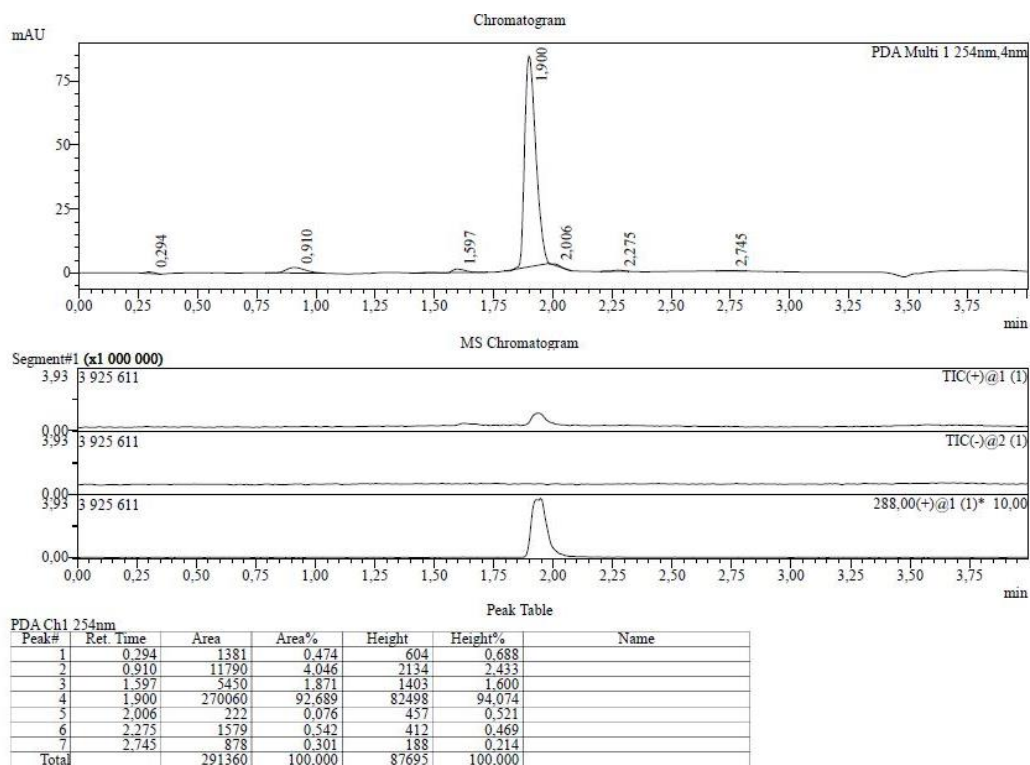

**Supplementary Fig. 97.** The high-performance liquid chromatography chromatogram of compound **19**

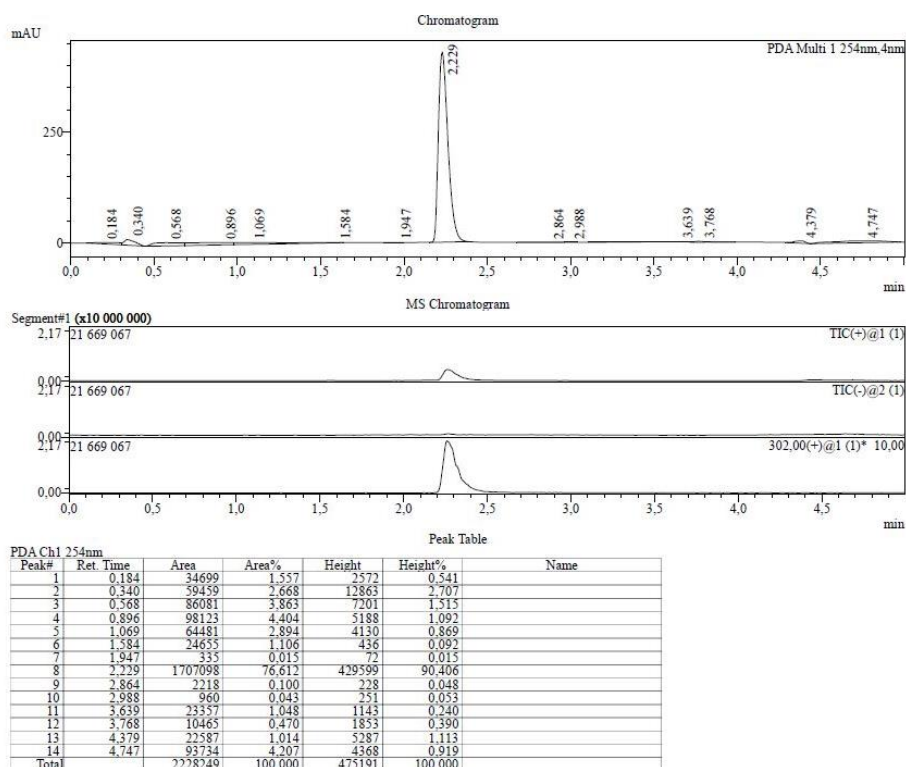

**Supplementary Fig. 98.** The high-performance liquid chromatography chromatogram of compound 20

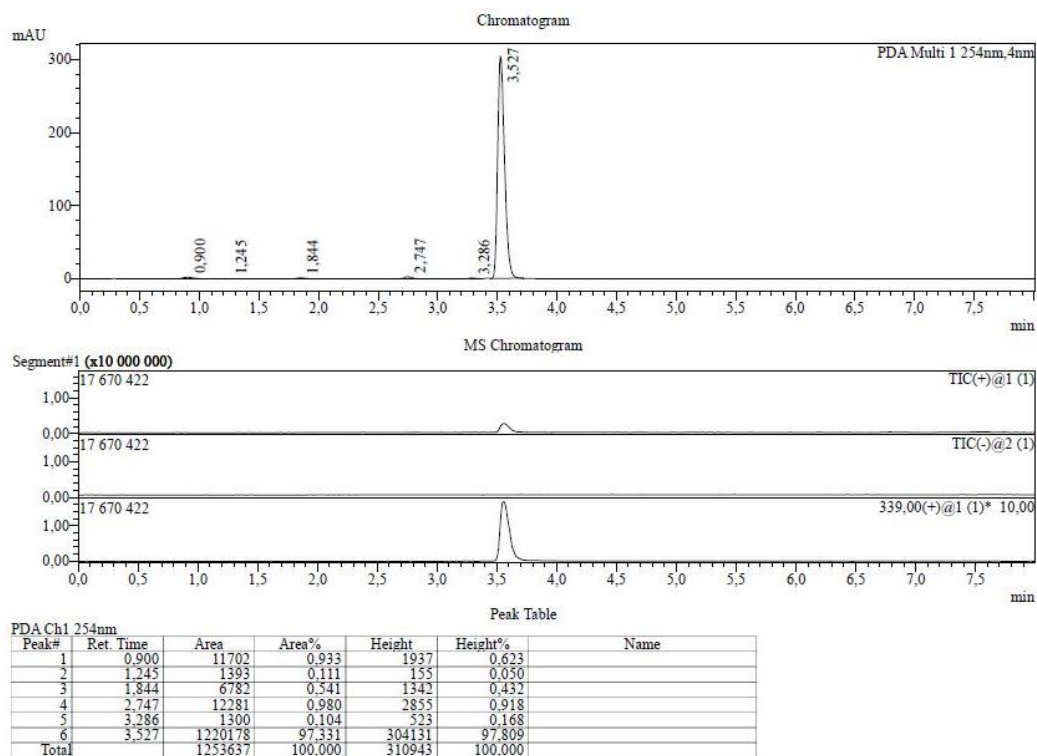

**Supplementary Fig. 99.** The high-performance liquid chromatography chromatogram of compound 21



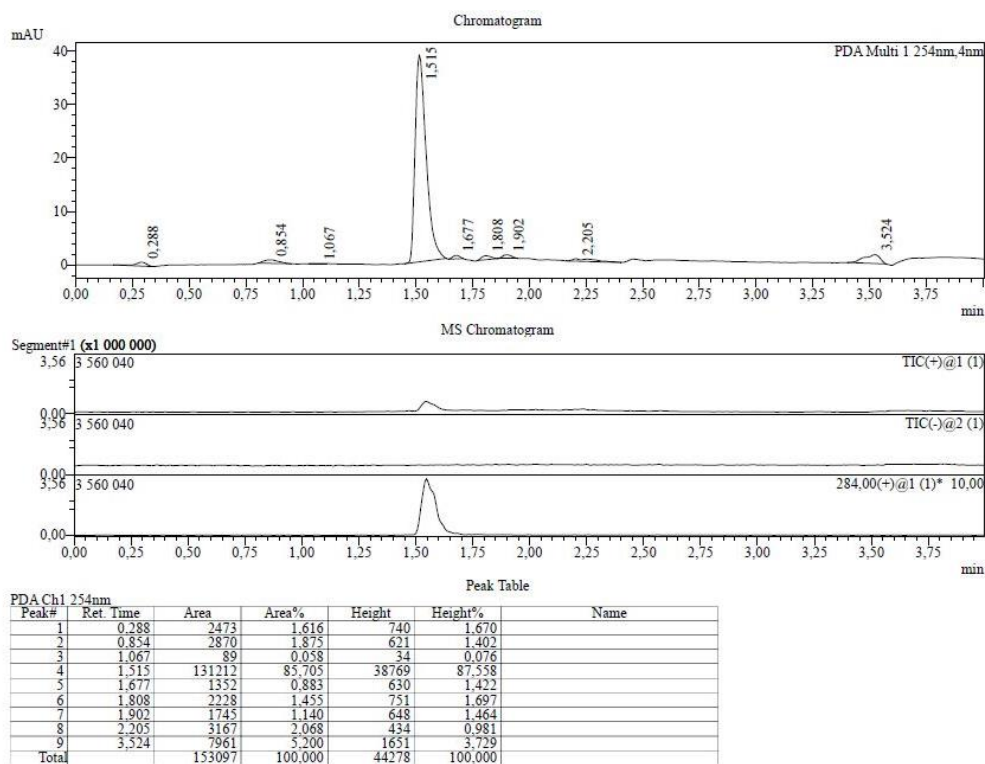

**Supplementary Fig. 100.** The high-performance liquid chromatography chromatogram of compound 22

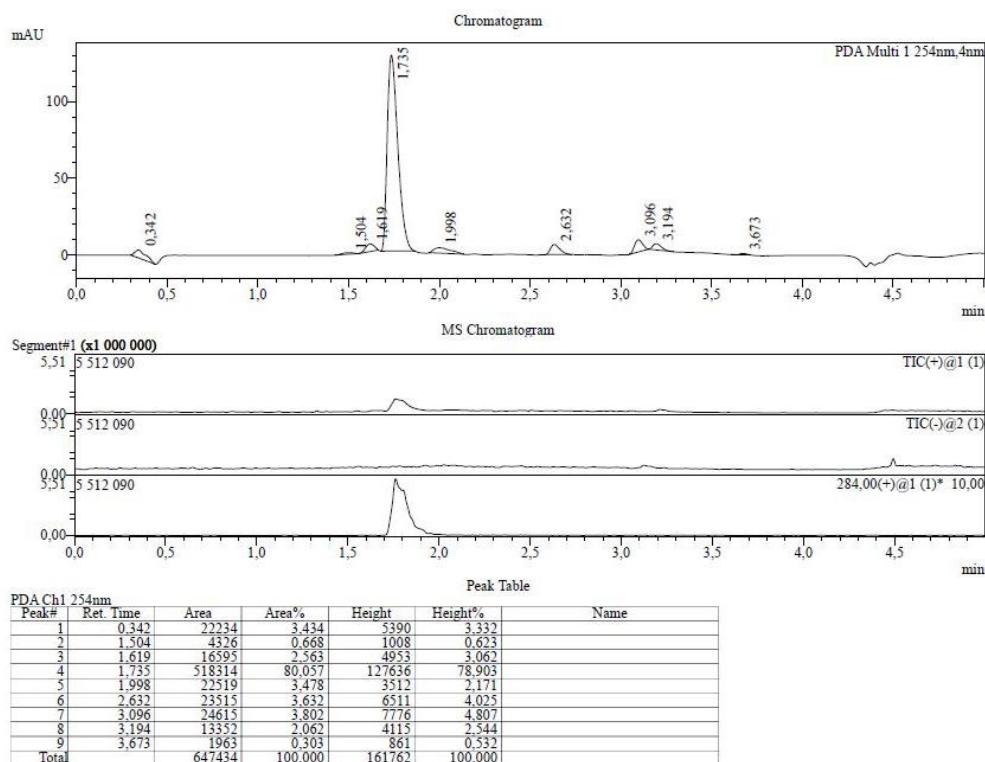

**Supplementary Fig. 101.** The high-performance liquid chromatography chromatogram of compound 23

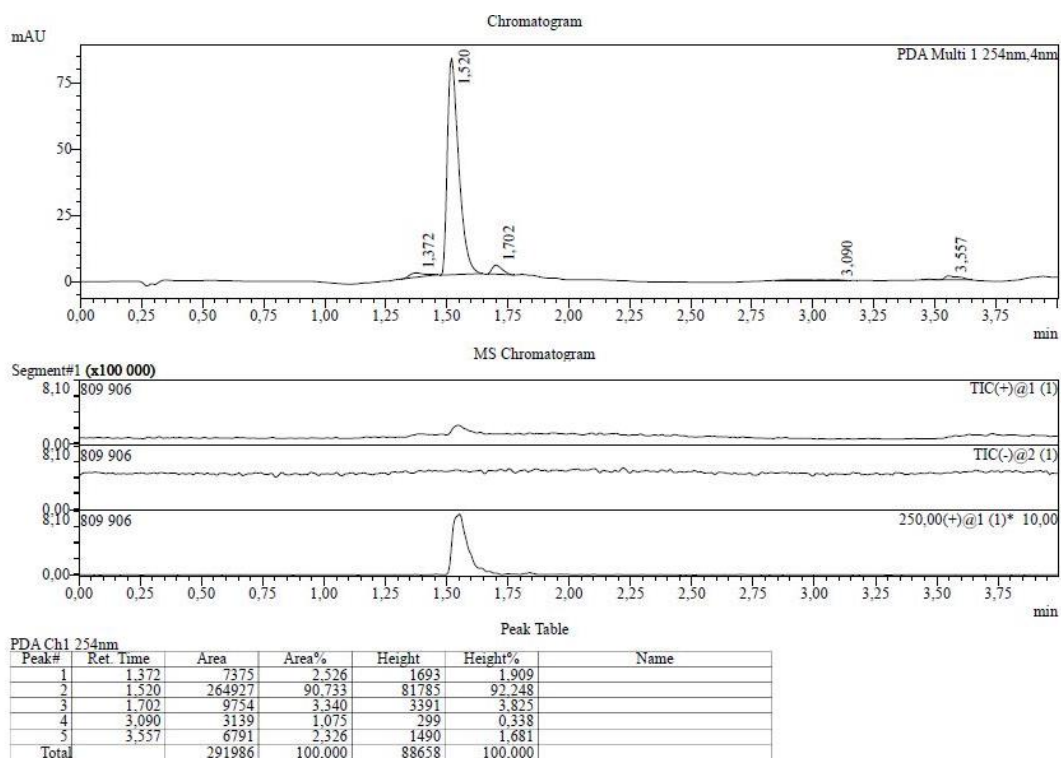

**Supplementary Fig. 102.** The high-performance liquid chromatography chromatogram of compound **S8**

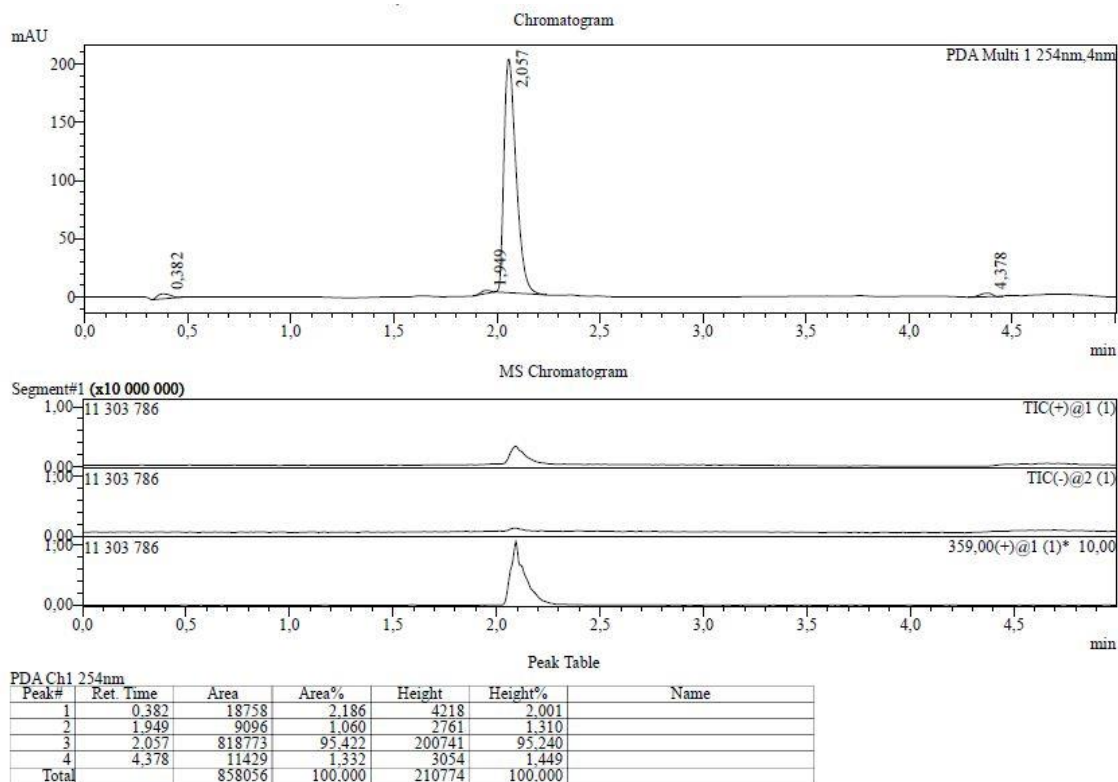

**Supplementary Fig. 103.** The high-performance liquid chromatography chromatogram of compound **19'S**

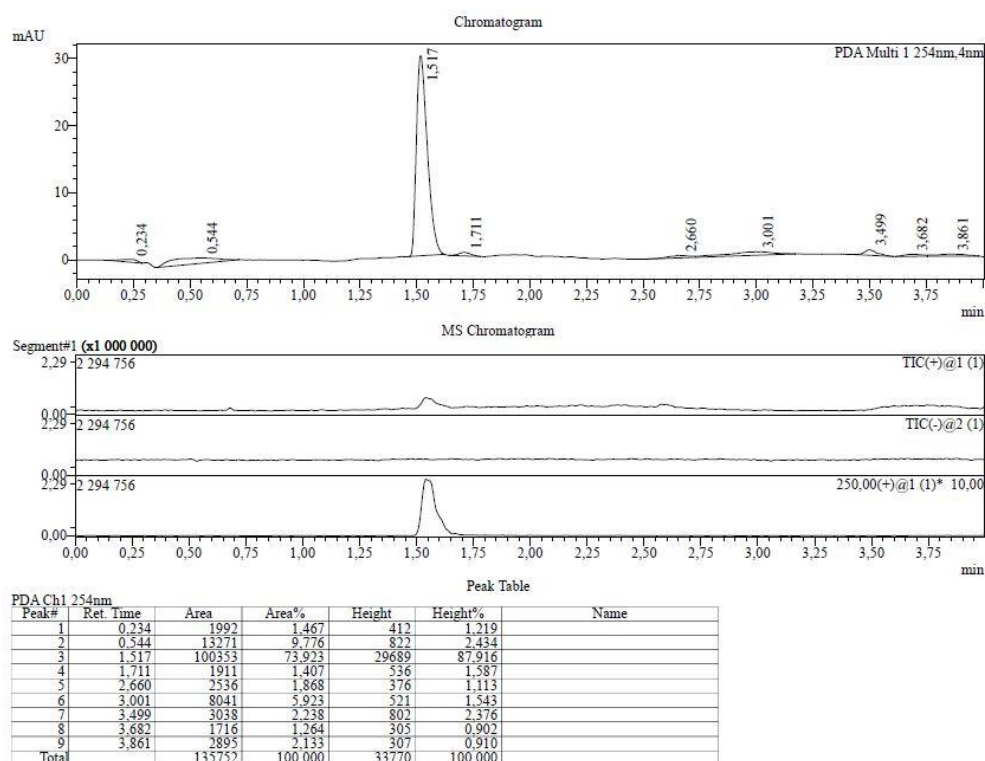

**Supplementary Fig. 104.** The high-performance liquid chromatography chromatogram of compound 24

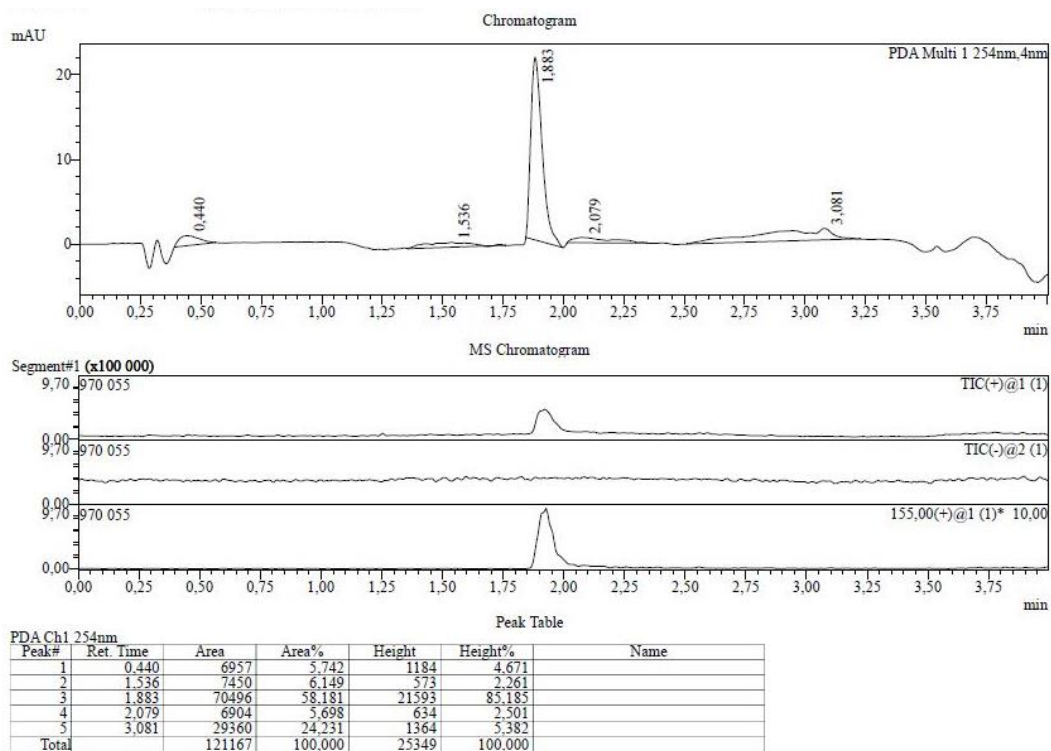

**Supplementary Fig. 105.** The high-performance liquid chromatography chromatogram of compound 26

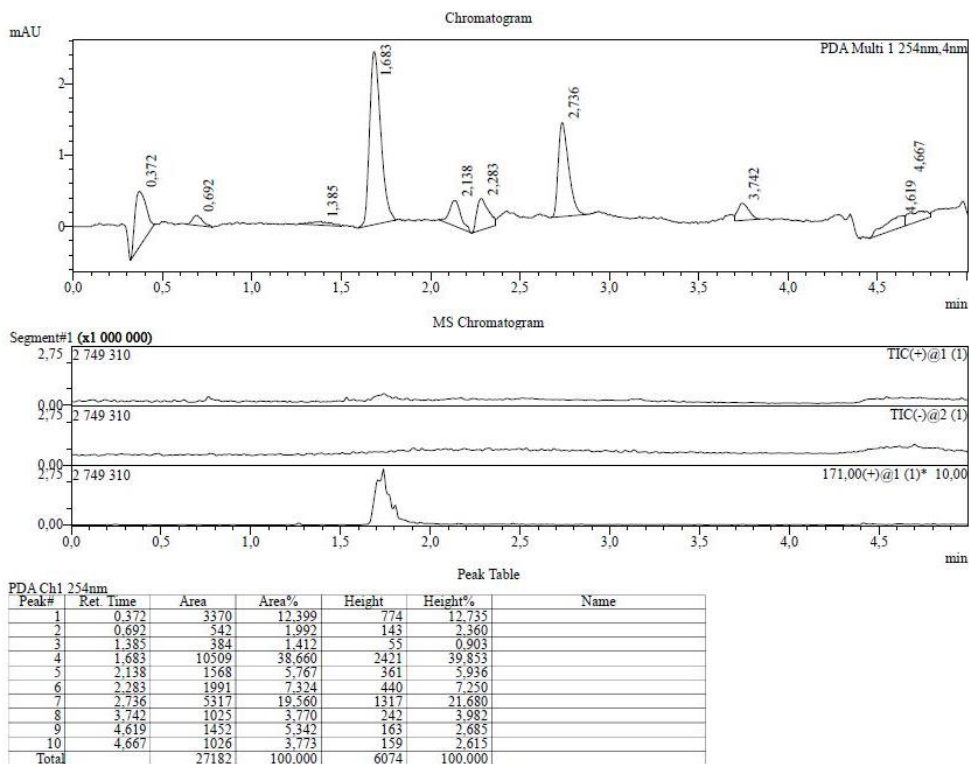

**Supplementary Fig. 106.** The high-performance liquid chromatography chromatogram of compound **S10**

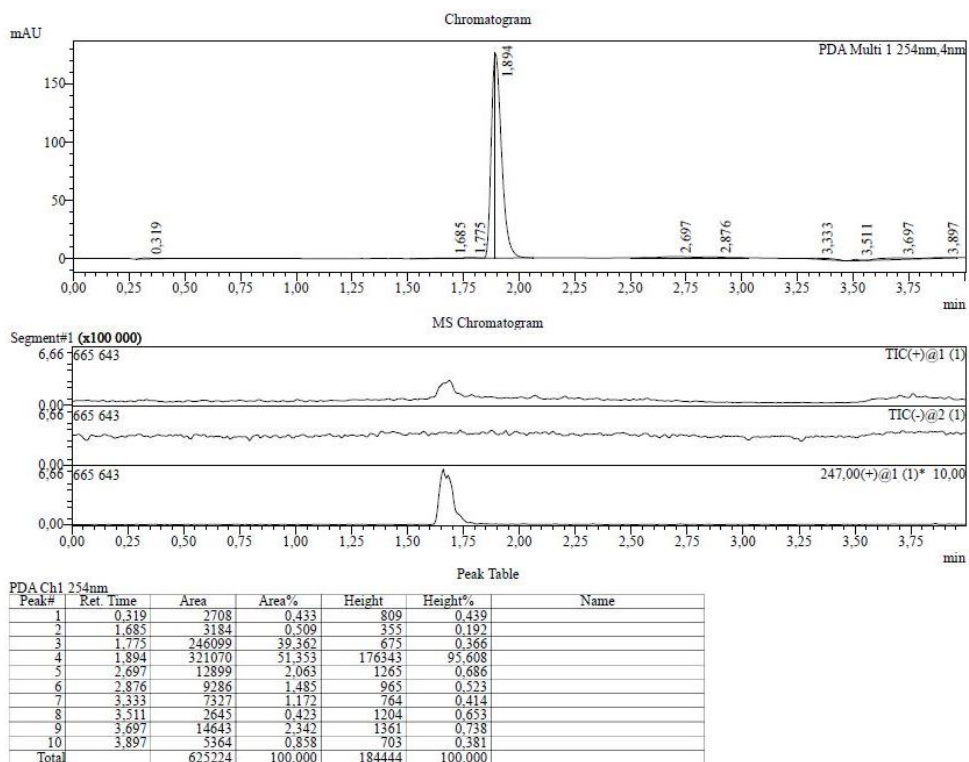

**Supplementary Fig. 107.** The high-performance liquid chromatography chromatogram of compound **S12**

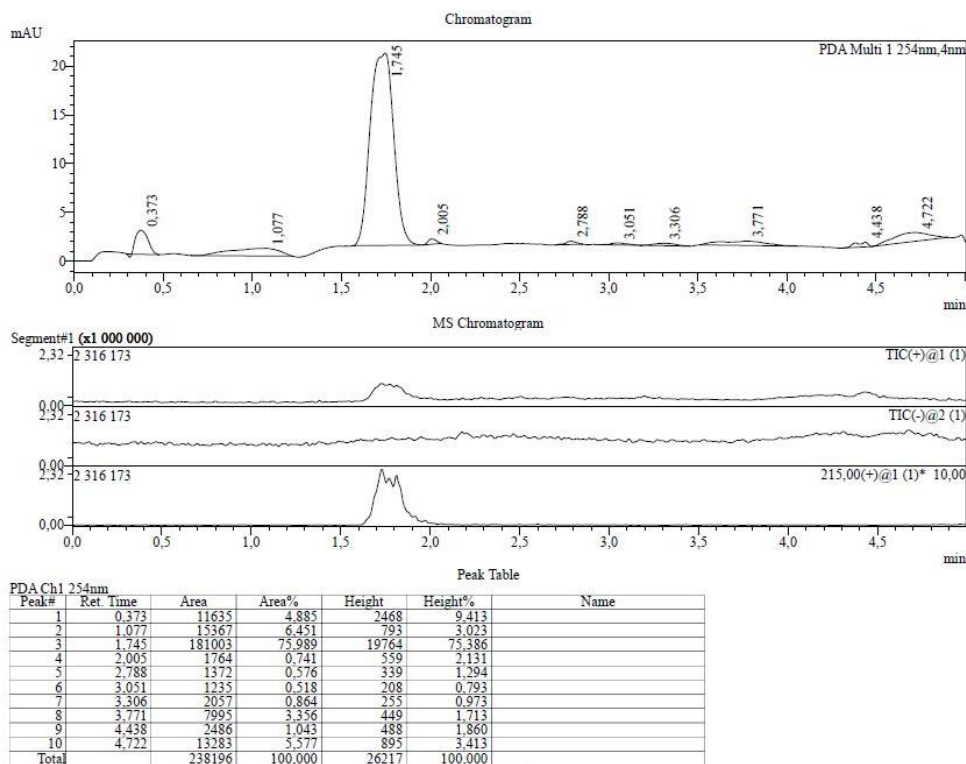

**Supplementary Fig. 108.** The high-performance liquid chromatography chromatogram of compound S13

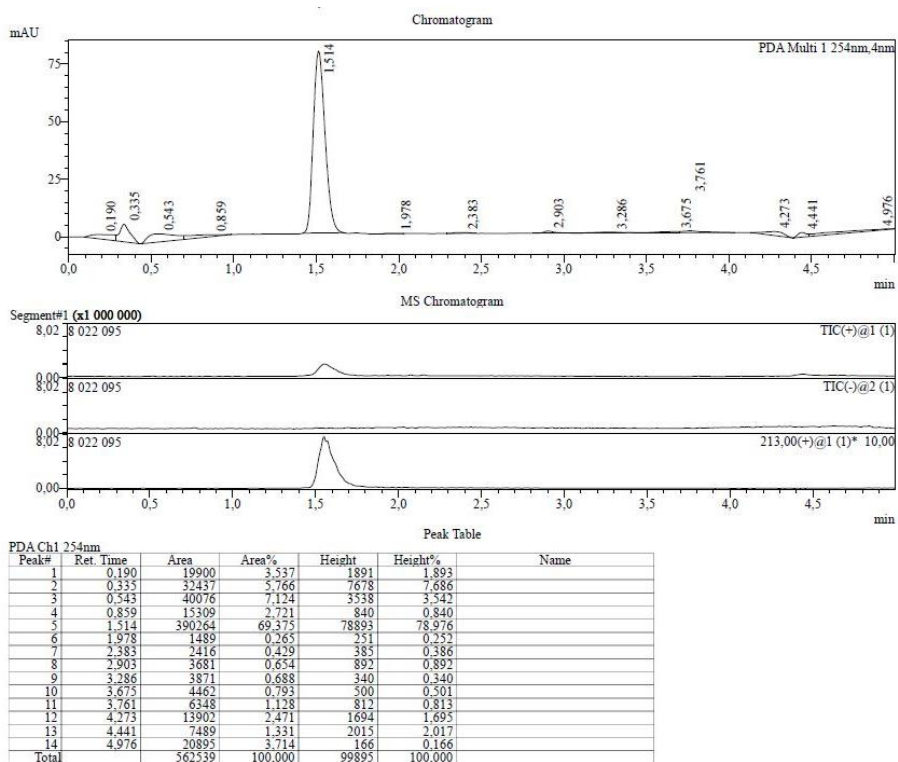

**Supplementary Fig. 109.** The high-performance liquid chromatography chromatogram of compound S15

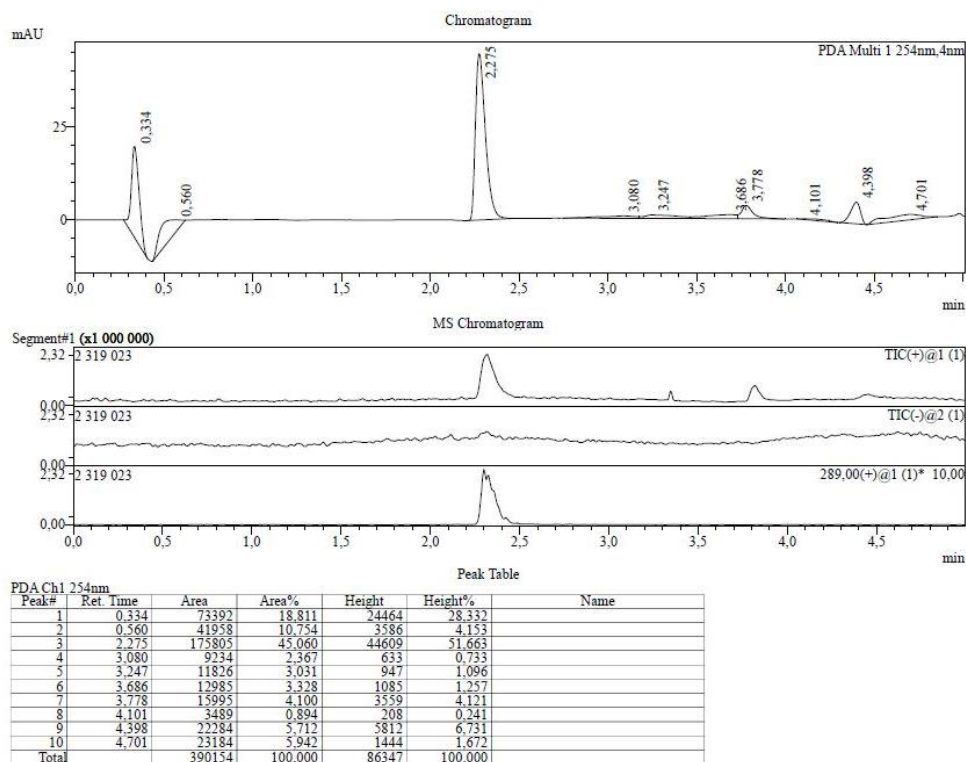

**Supplementary Fig. 110.** The high-performance liquid chromatography chromatogram of compound 27

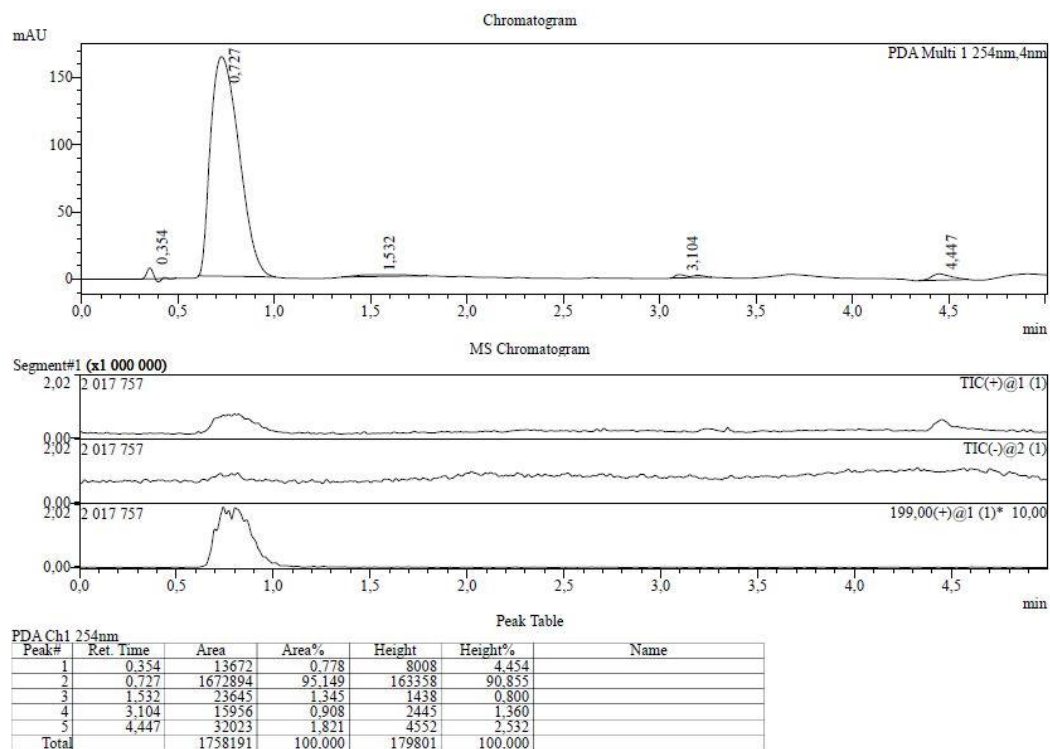

**Supplementary Fig. 111.** The high-performance liquid chromatography chromatogram of compound S16

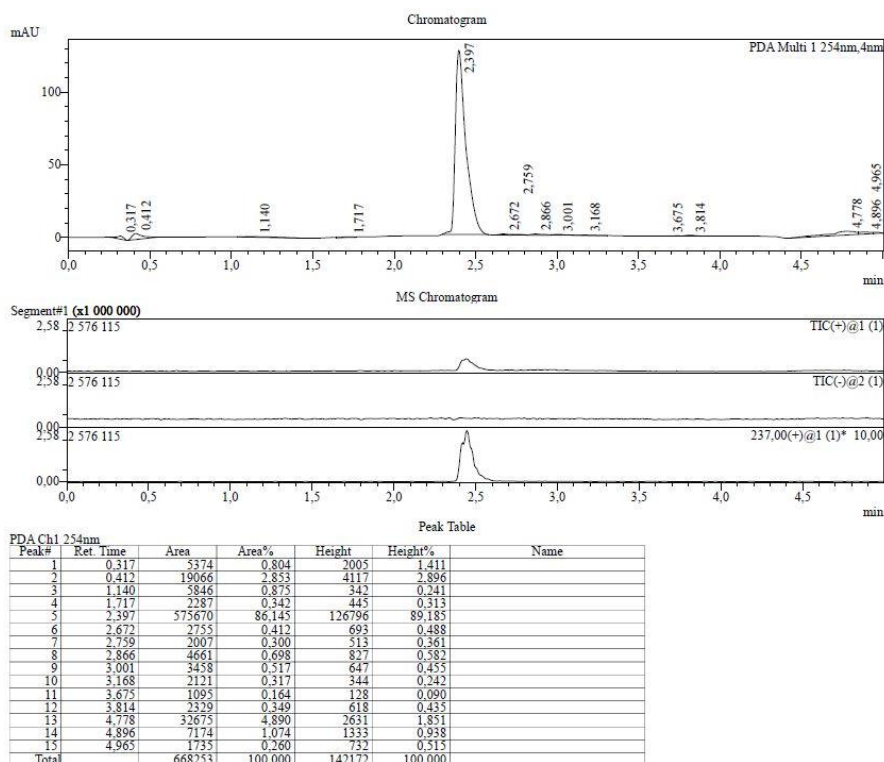

**Supplementary Fig. 112.** The high-performance liquid chromatography chromatogram of compound **28R/28S**

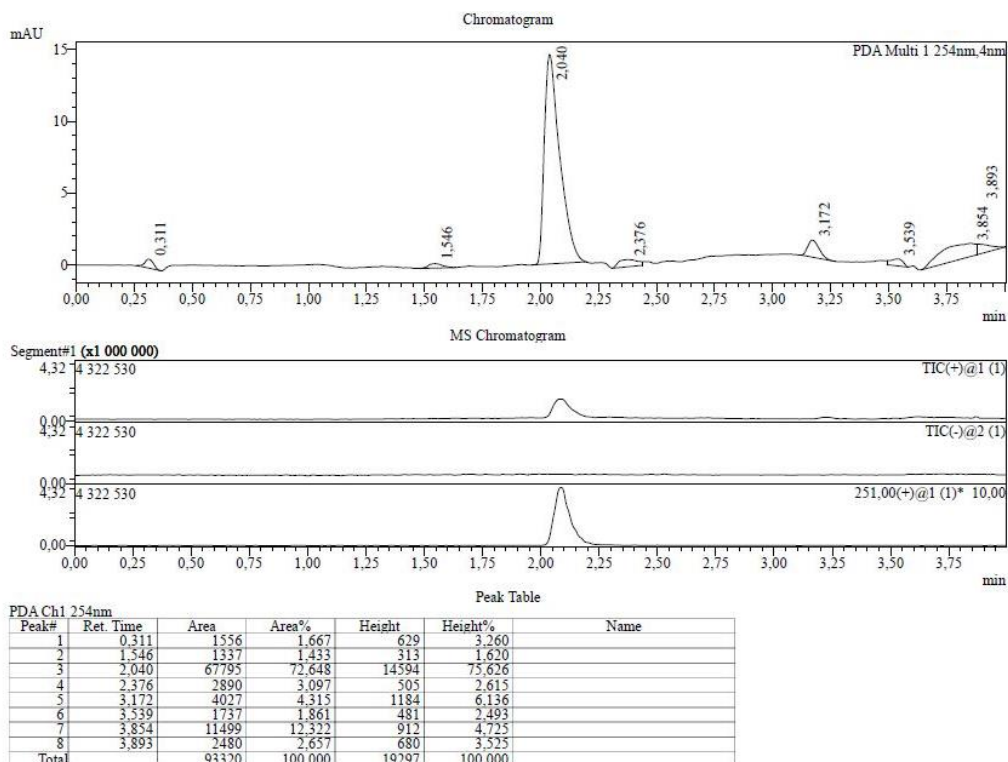

**Supplementary Fig. 113.** The high-performance liquid chromatography chromatogram of compound **29S**

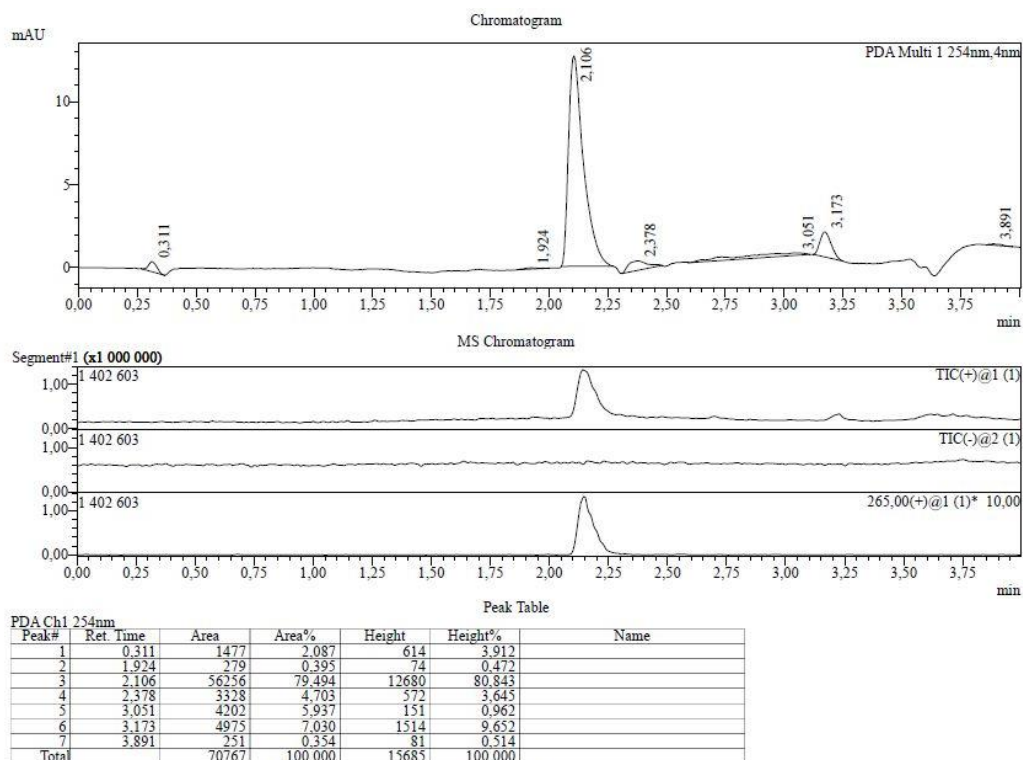

**Supplementary Fig. 114.** The high-performance liquid chromatography chromatogram of compound **30S**

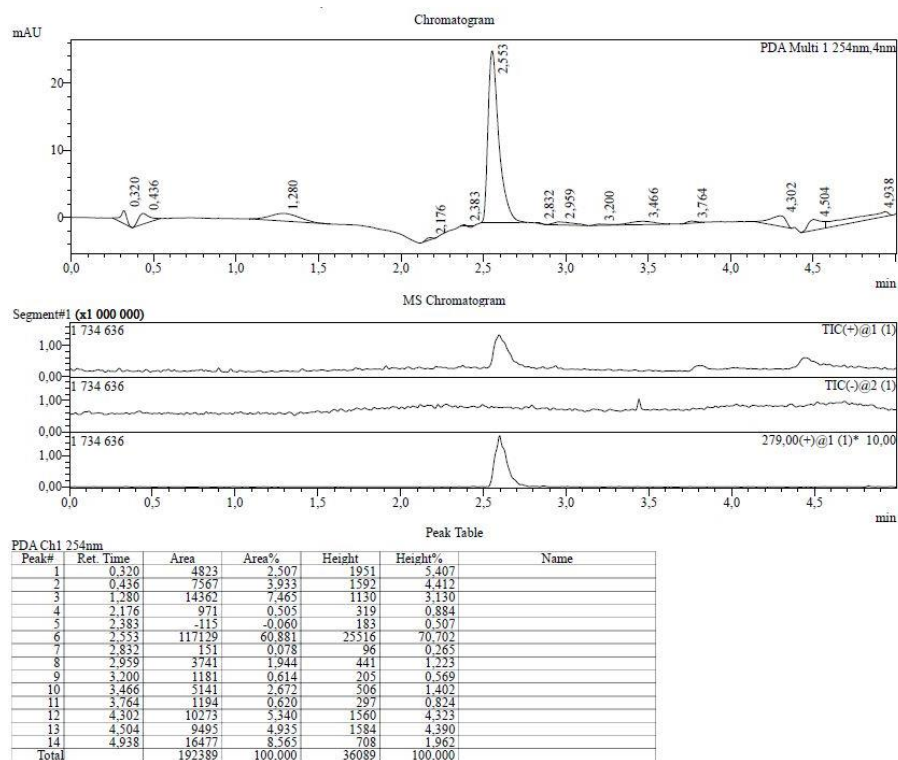

**Supplementary Fig. 115.** The high-performance liquid chromatography chromatogram of compound **31S**



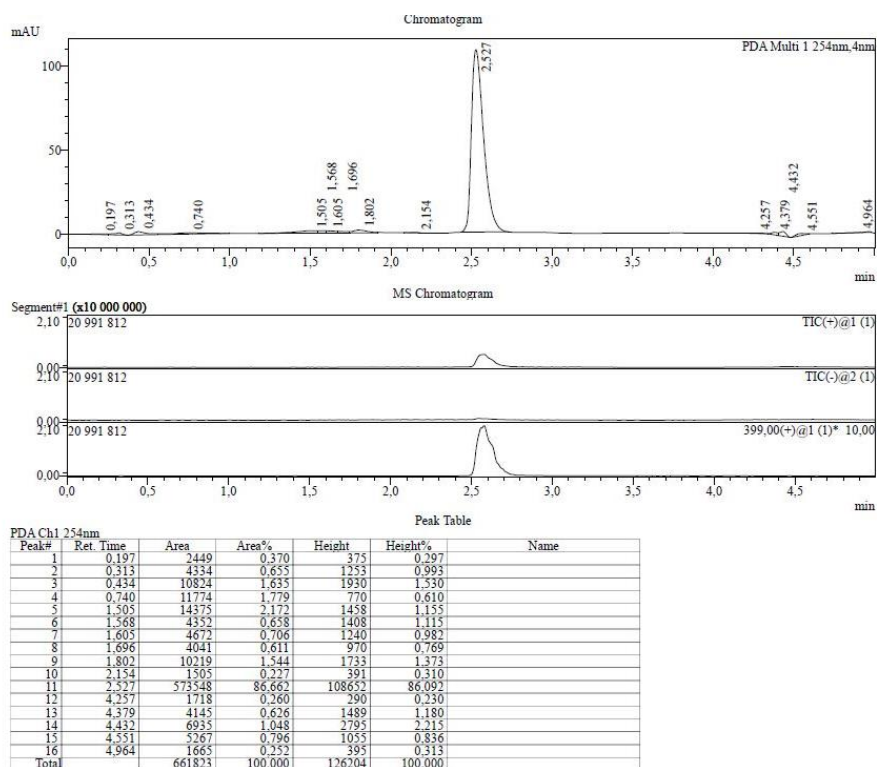

**Supplementary Fig. 116.** The high-performance liquid chromatography chromatogram of compound **32R/32S**

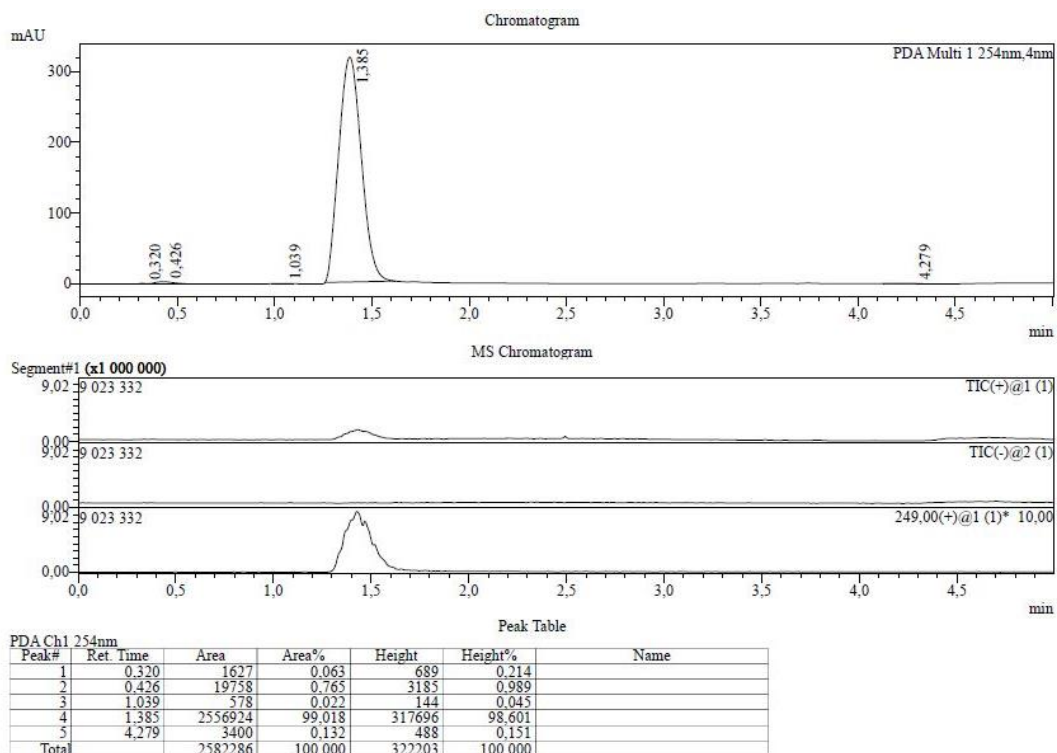

**Supplementary Fig. 117.** The high-performance liquid chromatography chromatogram of compound **S20**

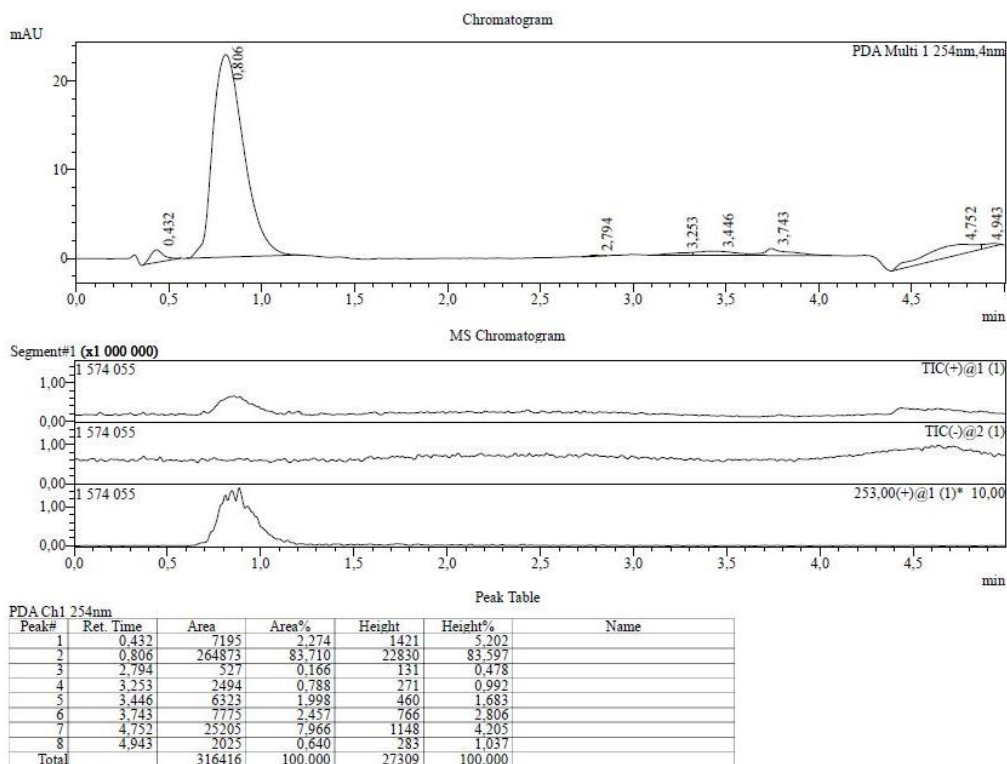

**Supplementary Fig. 118.** The high-performance liquid chromatography chromatogram of compound S21

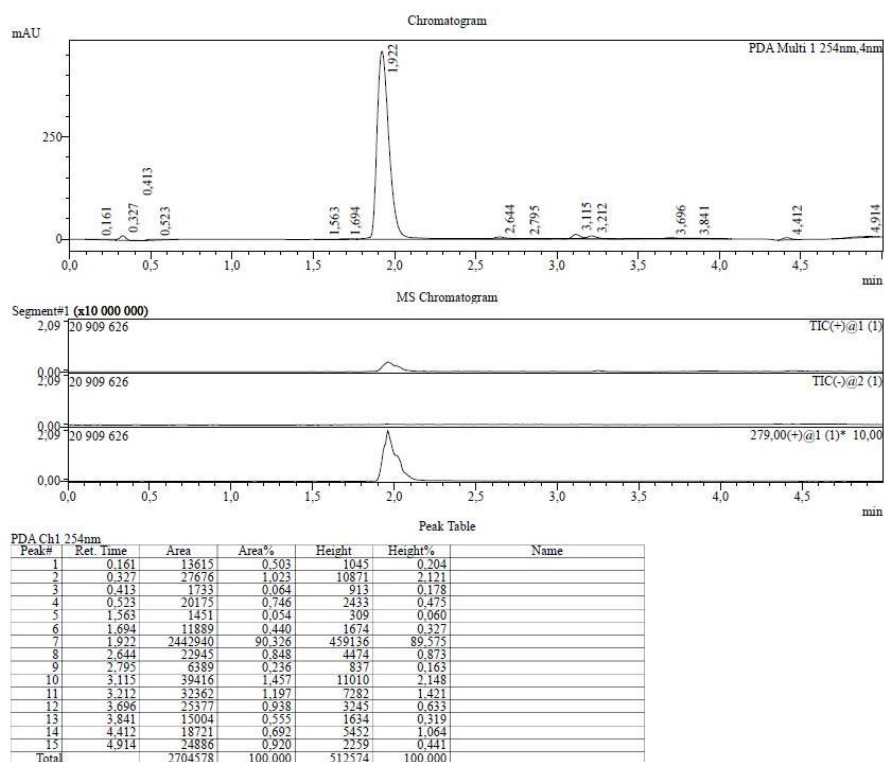

**Supplementary Fig. 119.** The high-performance liquid chromatography chromatogram of compound S22

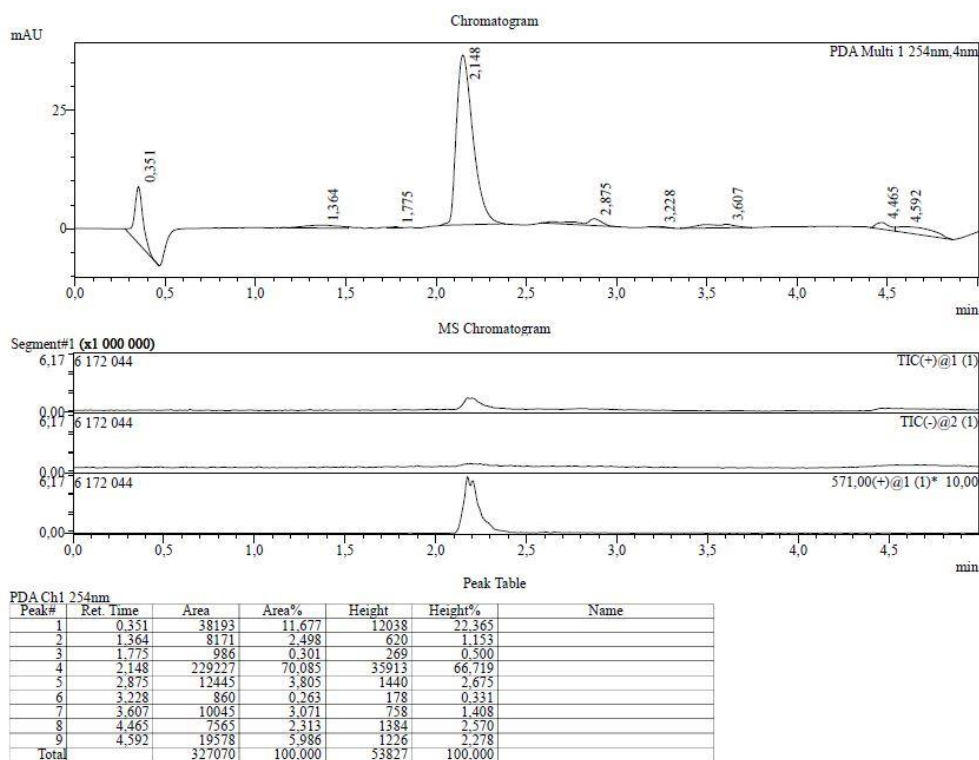

**Supplementary Fig. 120.** The high-performance liquid chromatography chromatogram of compound **33S**

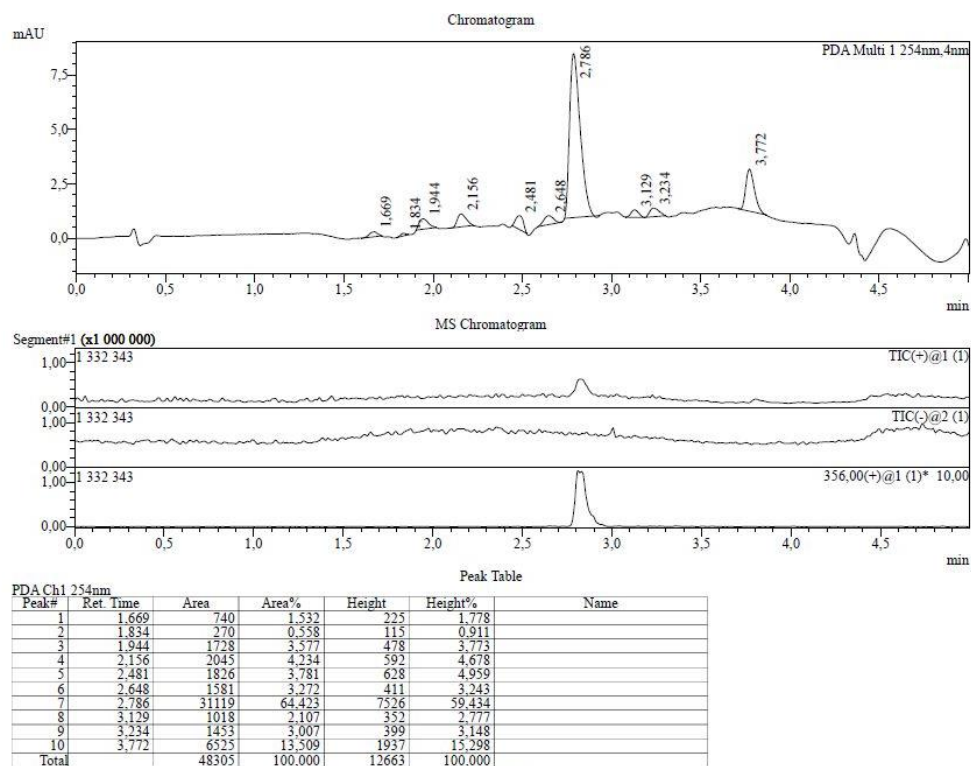

**Supplementary Fig. 121.** The high-performance liquid chromatography chromatogram of compound **34R/34S**

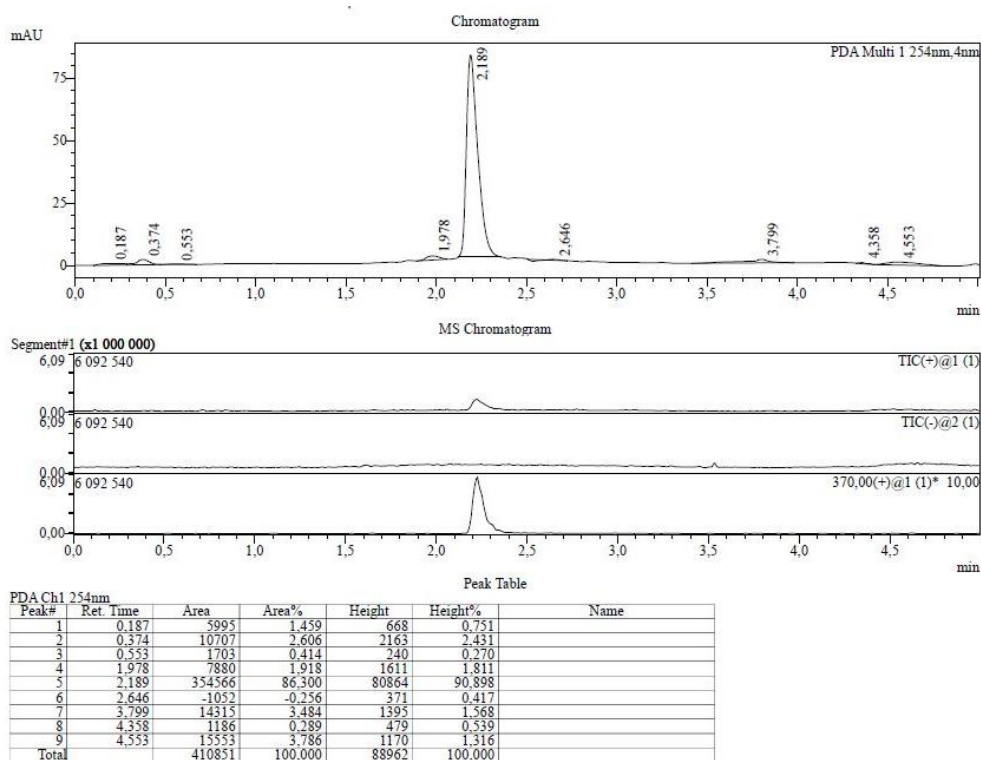

**Supplementary Fig. 122.** The high-performance liquid chromatography chromatogram of compound 35R/35S

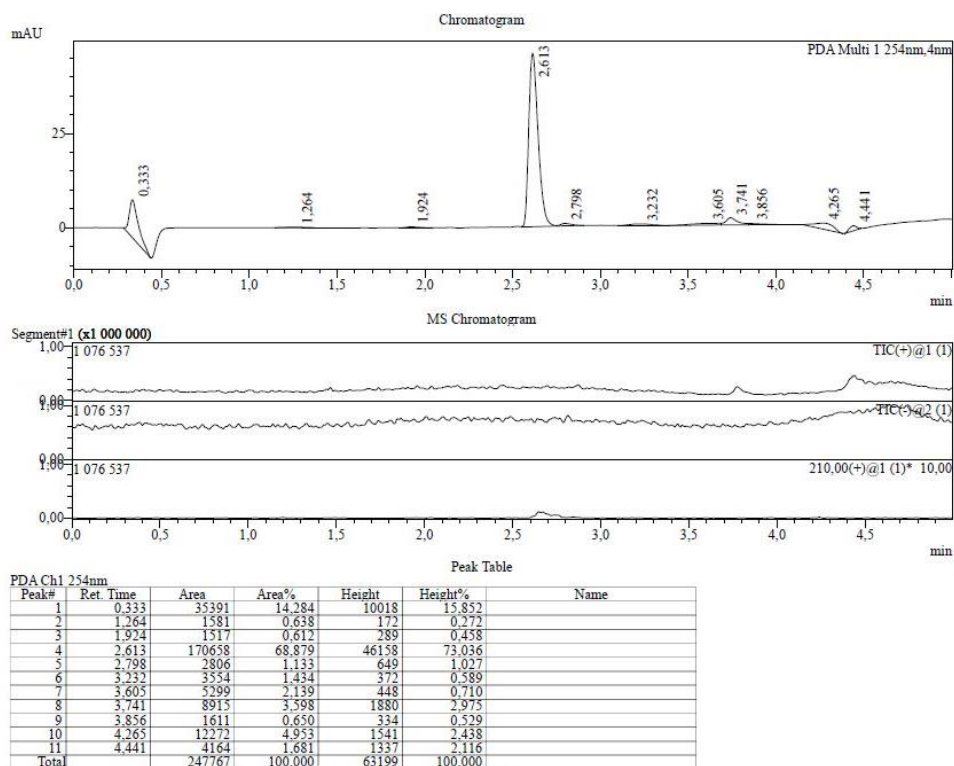

**Supplementary Fig. 123.** The high-performance liquid chromatography chromatogram of compound 40

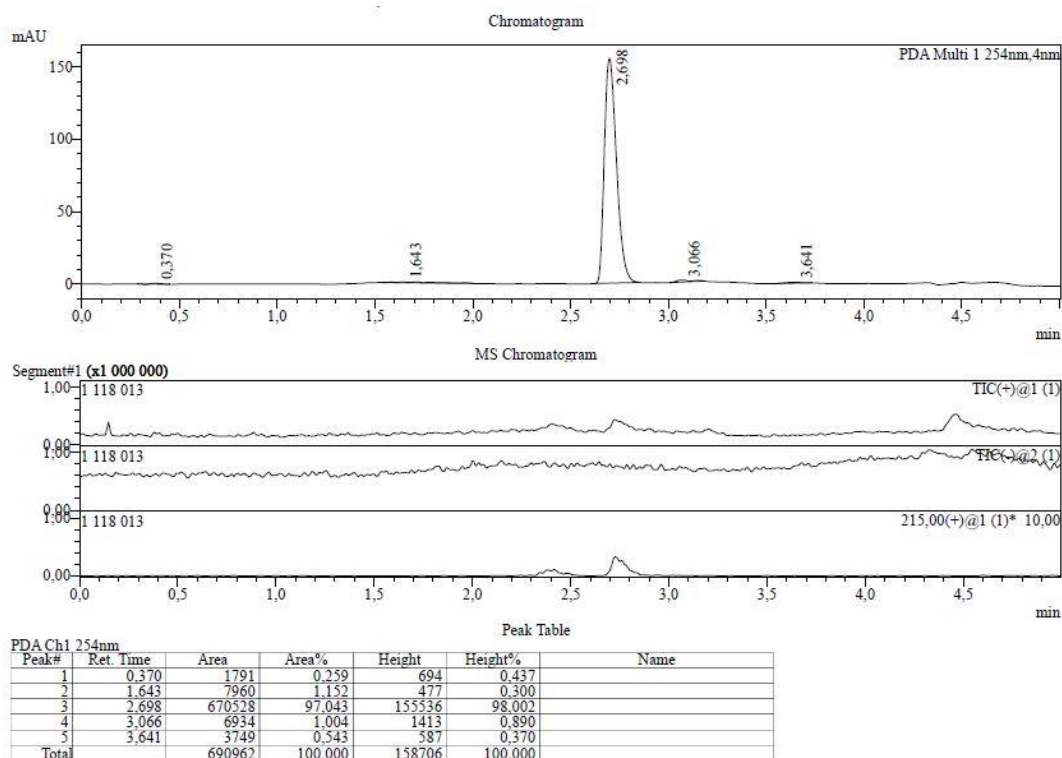

**Supplementary Fig. 124.** The high-performance liquid chromatography chromatogram of compound **3''R**

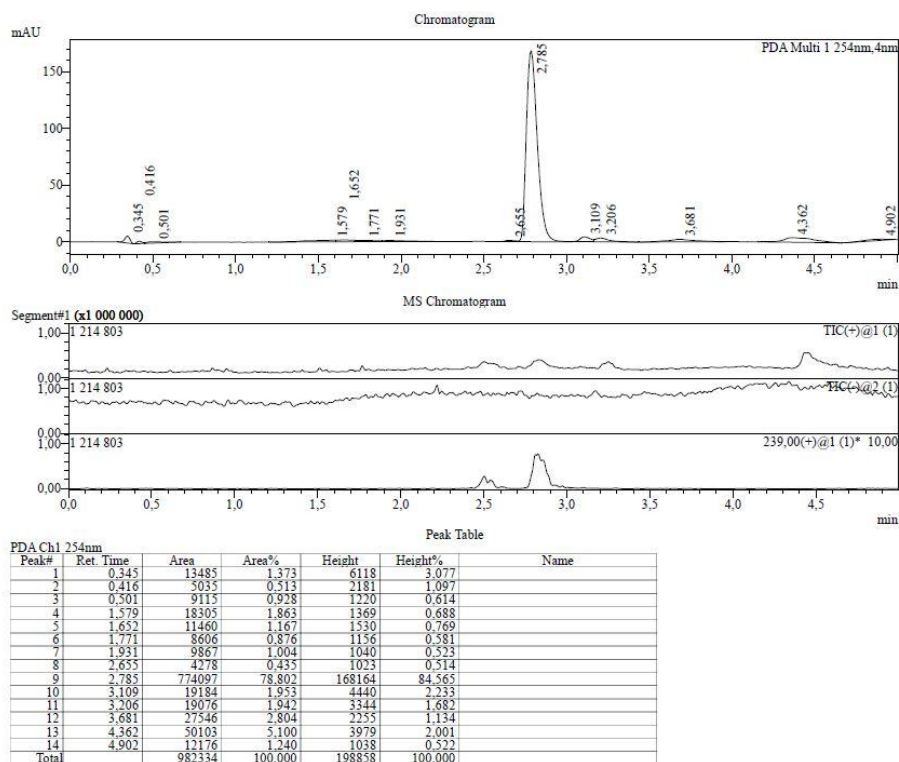

**Supplementary Fig. 125.** The high-performance liquid chromatography chromatogram of compound **6''R,R**

## SUPPLEMENTARY REFERENCES

1. Póti, Á. L. et al. Phosphorylation-Assisted Luciferase Complementation Assay Designed to Monitor Kinase Activity and Kinase-Domain-Mediated Protein-Protein Binding. *Int. J. Mol. Sci.* **24**, (2023).
2. Berkes, B. et al. Expedient and Diastereodivergent Assembly of Terpenoid Decalin Subunits having Quaternary Stereocenters through Organocatalytic Robinson Annulation of Nazarov Reagent. *Chemistry – A European Journal* **22**, 18101–18106 (2016).
3. Varga, S. et al. Total Syntheses of (-)-Minovincine and (-)-Aspidofractinine through a Sequence of Cascade Reactions. *Angewandte Chemie International Edition* **59**, 13547–13551 (2020).
4. Flaugh, M. E., Crowell, T. A. & Farlow, D. S. Acid-Catalyzed Annelation of  $\alpha$ -Alkyl Aldehydes and  $\alpha,\beta$ -Unsaturated Ketones. A One-Pot Synthesis of 4,4-Dimethyl-2-cyclohexen-1-one. *Journal of Organic Chemistry* **45**, 5399–5400 (1980).
5. Deny, L. J. et al. Bis-Michael Acceptors as Novel Probes to Study the Keap1/Nrf2/ARE Pathway. *J Med Chem* **59**, 9431–9442 (2016).
6. Brown, T. H. et al. Isocytosine H<sub>2</sub>-receptor histamine antagonists II. Synthesis and evaluation of biological activity at histamine H<sub>1</sub>- and H<sub>2</sub>-receptors of 5-(heterocyclyl)methylisocytosines. *Eur J Med Chem* **24**, 65–72 (1989).
7. Zhang, J. et al. A hydrogen bonding motif for forming extended assemblies. *Chemical Communications* **46**, 1062 (2010).
8. GARY, G. et al. Compounds and compositions for treating conditions associated with nlrp activity. **WO2017184624A1**, (2019).
9. Schultz, A. G. & Sundararaman, P. Stereochemical Control in Cyclofunctionalization of Olefinic Alcohols and Olefinic Phenols with Benzeneselenenyl Chloride. *Journal of Organic Chemistry* **49**, 2455–2462 (1984).
10. Peelen, T. J., Chi, Y., English, E. P. & Gellman, S. H. Synthesis of 4,4-disubstituted 2-aminocyclopentanecarboxylic acid derivatives and their incorporation into 12-helical  $\beta$ -peptides. *Org Lett* **6**, 4411–4414 (2004).
11. Meyer, C., Piva, O. & Pete, J. P. [2+2] Photocycloadditions and Photorearrangements of 2-Alkenylcarboxamido-2-cycloalken-1-ones. *Tetrahedron* **56**, 4479–4489 (2000).
12. El-Mansy, M. F., Kang, J. Y., Lingampally, R. & Carter, R. G. Proline Sulfonamide-Catalyzed, Domino Process for Asymmetric Synthesis of Amino- and Hydroxy-Substituted Bicyclo[2.2.2]octanes. *European J Org Chem* **2016**, 150–157 (2016).
13. Schulz, A., Thomas, M. & Villinger, A. Tetrazastannoles versus distannadiazanes – a question of the tin(  $\text{II}$  ) source. *Dalton Transactions* **48**, 125–132 (2019).
14. Horváth, D., Domonyi, F., Palkó, R., Lomoschitz, A. & Soós, T. Regioexhaustive Functionalization of the Carbocyclic Core of Isoquinoline: Concise Synthesis of Oxoaporphine Core and Ellipticine. *Synthesis (Stuttg)* **50**, 2181–2190 (2018).

15. Maynard, S. J., Almeida, A. M., Yoshimi, Y. & Gellman, S. H. New charge-bearing amino acid residues that promote  $\beta$ -sheet secondary structure. *J Am Chem Soc* **136**, 16683–16688 (2014).
16. Bendiabdellah, Y. *et al.* One-Pot Synthesis of Fused-Tetracyclic Scaffolds Employing a Lewis Acid Promoted Domino Reaction of Naphthoquinones. *Synthesis (Stuttg)* 2321–2333 (2011) doi:10.1055/S-0030-1260073.
17. Elemes, Y. & Foote, C. S. Stepwise Mechanisms in the Ene Reaction of  $\alpha,\beta$ -Unsaturated Esters with N-Phenyl-1,2,4-triazoline-3,5-dione and Singlet Oxygen. Intermolecular Primary and Secondary Hydrogen Isotope Effects. *J Am Chem Soc* **114**, 6044–6050 (1992).
18. Alan Aitken, R., Armstrong, J. M., Drysdale, M. J., Ross, F. C. & Ryan, B. M. Flash vacuum pyrolysis of stabilised phosphorus ylides. Part 15.1 Generation of alkoxy carbonyl(sulfonyl)carbenes and their intramolecular insertion to give alkenyl sulfides. *J Chem Soc Perkin 1* 593–604 (1999) doi:10.1039/A808813F.
19. Mandal, P. K., Ren, Z., Chen, X., Xiong, C. & McMurray, J. S. Structure-affinity relationships of glutamine mimics incorporated into phosphopeptides targeted to the SH2 domain of signal transducer and activator of transcription 3. *J Med Chem* **52**, 6126–6141 (2009).
20. Schmitz, J., Li, T., Bartz, U. & Gütschow, M. Cathepsin B Inhibitors: Combining Dipeptide Nitriles with an Occluding Loop Recognition Element by Click Chemistry. *ACS Med Chem Lett* **7**, 211–216 (2016).
21. Schädel, N. *et al.* Synthesis of Imidazole and Histidine-Derived Cross-Linkers as Analogues of GOLD and Desmosine. *Synthesis (Stuttg)* **53**, 2260–2268 (2021).
